# Supplementary material for: From the RNA-Peptide World: Prebiotic Reaction Conditions Compatible with Lipid Membranes for the Formation of Lipophilic Random Peptides in the Presence of Short Oligonucleotides, and More
Source: MDPI journal article supplement (doi:10.3390/life14010108), 2024-01-09
Supplement: s1 [file s1]

# Supporting information — From the RNA-Peptide World: Prebiotic reaction conditions compatible with lipid membranes for the formation of lipophilic random peptides in the presence of short oligonucleotides, and more.

Augustin Lopez, Antoine Vauchez, Ghinwa Ajram, Anastasiia Shvetsova, Gabrielle Leveau, Michele Fiore and Peter Strazewski\*

Université de Lyon, Université Claude Bernard Lyon 1, Institut de Chimie et Biochimie Moléculaires et Supramoléculaires (ICBMS), Laboratoire de Chimie Organique 2 (LCO2), Bâtiment Edgar Lederer, 1 rue Victor Grignard, 69100 Villeurbanne, France

\* Correspondence: strazewski@univ-lyon1.fr

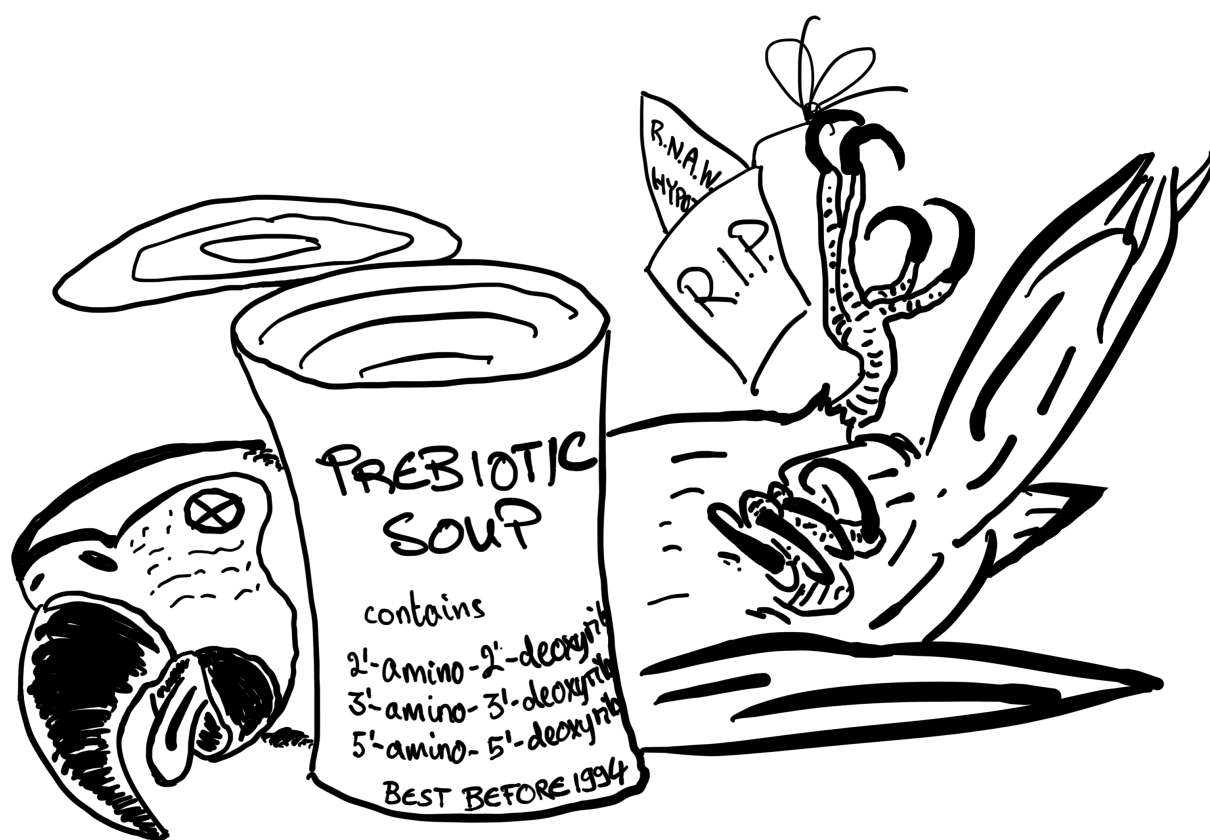

The graphical abstract on the first webpage of the article is an illustration of the current situation in the origins of life sciences where the community is split into those that, like in Monty Python's "Dead Parrot Sketch" [see ref. 60], believe that the RNA world hypothesis is not valid any more (pet buyer: "this parrot is dead, stone-dead, it has deceased, it is no more") and those that still cling to it (pet seller: "no, no, it's resting, it just sleeps"). Ever since experimenters have shown that, in order to make nucleic acids grow enzyme-free and efficiently in length, they needed to be artificially modified by noticeably more nucleophilic amino groups that replaced the natural hydroxy groups, which was an approach that started 1987, peaked 1994 and went on for one and a half decades. It has thus become more and more evident that natural nucleic acids would just not be able to grow considerably without the help of other molecular players, most likely composed of catalytic peptides, proteins.

## Table of contents

|                                                                                                                                                                                          |     |
|------------------------------------------------------------------------------------------------------------------------------------------------------------------------------------------|-----|
| 1) Chemicals, general instruments and analytical procedures .....                                                                                                                        | 3   |
| 1)1) Chemicals .....                                                                                                                                                                     | 3   |
| 1)2) General instruments.....                                                                                                                                                            | 3   |
| 1)3) HPLC instruments and materials .....                                                                                                                                                | 3   |
| 1)4) Instrument and material for the solid-supported synthesis of oligonucleotides .....                                                                                                 | 3   |
| 1)5) MS analyses .....                                                                                                                                                                   | 4   |
| 1)6) NMR analyses .....                                                                                                                                                                  | 4   |
| 2) Supplementary information to: Production and characterization of mixtures of random peptides..                                                                                        | 4   |
| 2)1) NMR characterizations of the random peptides generated in GAVLPSAA mixtures.....                                                                                                    | 4   |
| 2)2) MS characterizations of the random peptides generated in GAVLPSAA mixtures.....                                                                                                     | 10  |
| 2)3) HPLC characterizations of the random peptides generated in GAVLPSAA mixtures (click reactions) .....                                                                                | 16  |
| 3) Supplementary information to: Coupling attempts of peptides with oligonucleotides in prebiotic conditions compatible with the presence of lipidic giant vesicles.....                 | 18  |
| 3)1) pUGGU RNA production and analysis.....                                                                                                                                              | 19  |
| 3)2) Coupling attempts and vesicles production in the presence of EDC and EtIm.....                                                                                                      | 20  |
| 3)3) Coupling attempts and vesicles production in the presence of EDC and DMAP .....                                                                                                     | 35  |
| 3)4) Coupling attempts with NCA in the presence of EDC and EtIm.....                                                                                                                     | 54  |
| 4) Supplementary information to: Ligation attempts between activated complementary oligonucleotides in prebiotic conditions compatible with the presence of lipidic giant vesicles ..... | 59  |
| 4)1) Oligonucleotides production and analyses.....                                                                                                                                       | 60  |
| 4)2) Templated ligation attempts performed in two steps and vesicle production in the presence of EDC and sulfo-NHS.....                                                                 | 75  |
| 4)3) Templated ligation attempts performed in one step and vesicle production in the presence of EDC and NaCl .....                                                                      | 100 |
| 5) References .....                                                                                                                                                                      | 127 |

## 1) Chemicals, general instruments and analytical procedures

### 1)1) Chemicals

4-(Dimethylamino)pyridine (DMAP), *Nile Red*<sup>™</sup> dye, trimethylamine tris-hydrofluoride (97 %, Et<sub>3</sub>N-3HF) were purchased from Acros Organics. 1,2-Dilauroyl-*sn*-glycerol-3-phosphate (DLPA) and 1,2-dioleoyl-*sn*-glycerol-3-phosphoethanolamine-N-(lissamine rhodamine B sulfonyl) (DOPE-Rhodamine) were from Avanti Lipids. MeOH, ammonia solution (35 % v/v), sodium chloride (NaCl) and methoxytrimethylsilane were from Fisher Scientific. Magnesium chloride, *O*-phospho-L-serine and L-leucine were from Fluka. 3-Azido-L-alanine ( $\beta$ -azidoalanine) and the fluorescent and clickable probes (DBCO-AF488 and DBCO-PEG<sub>4</sub>-5/6-FAM) were from Jena Biosciences. Ethanolic methylamine (33 % v/v), glycine, L-alanine, L-valine, 1,1'-carbonyl diimidazole (CDI) and lauric acid (LA) were from Sigma-Aldrich. 1-Ethyl-3-(3-dimethylaminopropyl)carbodiimide (EDC), N-hydroxysulfosuccinimide (sulfo-NHS), 1-monolauroylglycerol (MLG) and 1-ethylimidazole (EtIm) were from TCI.

### 1)2) General instruments

The instruments used were an Eppendorf<sup>™</sup> Thermomixer Compact, a Christ Alpha 1-4 LD plus lyophiliser, a Herafreeze<sup>™</sup> 586 Basic freezer, a Sigma *Laborzentrifugen* centrifuge from Fisher Scientific, a V-730 UV/visible light spectrophotometer from Jasco, a programmable IPP55plus incubator from Memmert, a SC110A SpeedVac<sup>™</sup> concentrator from Savant, an OsmoTouch<sup>™</sup> 1 osmometer from Astori, a pH meter and microelectrode from Toledo, a Carl Zeiss inverted microscope Observer Z1 equipped with 20x, 50x and 100x oil immersion objectives and AxioCam recording.

### 1)3) HPLC instruments and materials

All High-Performance Liquid Chromatography (HPLC) analyses and purifications were performed using reversed-phase elution on a LC20 system from Shimadzu (high-pressure mixing double-pump system; max flow rate 20 mL/min for each pump). The system was equipped with a DGU-20A3R degasser from Shimadzu (operative up to 10 mL/min per line), separate analytical and preparative capillary lines, two separate injectors from Rheodyne (100  $\mu$ L and 2 mL loops). The columns were sometimes placed in a programmable incubator (Memmert) to maintain a thermostatic column temperature. For each analysis 5  $\mu$ L were commonly injected, purifications could involve up to 1.8 mL per injection, depending on the column, including multiple injections. The eluted compounds were observed using ultraviolet (UV) detection at two wavelengths at a time (SPD-20A from Shimadzu), fluorescence detection (RF-20A XS from Shimadzu) and laser-driven evaporative light scattering detection (ELSD, Sedex 90 LT from Sedere). The three detectors could be used separately, pairwise or all together in the sequential order as mentioned above.

HPLC grade acetonitrile and methanol eluents were from Fisher Scientific. Ultra-pure water was taken from an ACCU20 Ultra-Pure Water System from Fisher Scientific. Glacial acetic acid (HPLC grade) and aqueous ammonia (35 %) were also from Fisher Scientific.

### 1)4) Instrument and material for the solid-supported synthesis of oligonucleotides

Oligonucleotide synthesis on solid support was performed on an Applied Biosystems DNA/RNA Synthesizer, model ABI 392 (8 monomer bottles) equipped with conductivity monitoring of stepwise yields and operated using a computer with the *OligoNet 1.0.1*<sup>™</sup> software. The dry solvents (CH<sub>3</sub>CN and DCM) were from Sigma-Aldrich (DNA synthesis grade). The synthesizer-related chemicals, solutions and solid supports (crystalline ETT activator, Cap Mix A: THF/lutidine/acetic anhydride 8/1/1, Cap Mix B: 10% NMI/THF, Deblock Mix: 3% TCA/DCM and Oxidiser: 0.02 M iodine in THF/pyridine/water 7/2/1, chemical 5'-phosphorylation reagent (CPR), CE-phosphoramidites (dmf-G and U) and 10  $\mu$ mole-scale

columns filled with CPG 1000 solid-support-bound 3'-terminal nucleoside or phosphate were all purchased from Link Technologies.

## 1)5) MS analyses

Low-resolution Mass Spectrometry (MS) was carried out on a Bruker AmaZon SL ion trap spectrometer with an electrospray ionization (ESI) source. Both positive and negative ion modes could be used.

Ultra-High-Performance Liquid Chromatography/Mass Spectrometry (UHPLC/MS) was carried out a U3000 system (Thermo Scientific), hyphenated to a Bruker Impact II quadrupole/time of flight (Q-TOF) high-resolution mass spectrometer. For ESI-MS both positive and negative ion modes were used.

Matrix assisted Laser-desorption (MALDI)-MS was carried out on a Bruker Autoflex speed MALDI-TOF spectrometer operated in positive ion mode. Each sample (0.5  $\mu$ L) was mixed with a matrix solution (0.5  $\mu$ L) consisting of 2',4',6'-trihydroxy acetophenone and diammonium citrate, spotted on a stainless-steel plate then dried at room temperature.

## 1)6) NMR analyses

All deuterated solvents originated from Eurisotop. NMR spectra were recorded on Bruker Advance spectrometers: 300 MHz (for  $^1\text{H}$ ) or 400 MHz (for  $^1\text{H}$ ).

## 2) Supplementary information to: Production and characterization of mixtures of random peptides

### 2)1) NMR characterizations of the random peptides generated in GAVLPSSAA mixtures

Glycine (Fig. S1), L-Alanine (Fig. S2), L-Valine (Fig. S3) and L-Leucine (Fig. S4) in  $\text{D}_2\text{O}$  were independently added in different concentrations to 2.5 corresponding equivalents of solid CDI and left for different times under agitation. The  $^1\text{H}$  NMR (300 MHz) spectra were recorded A) before and B) after addition of CDI.

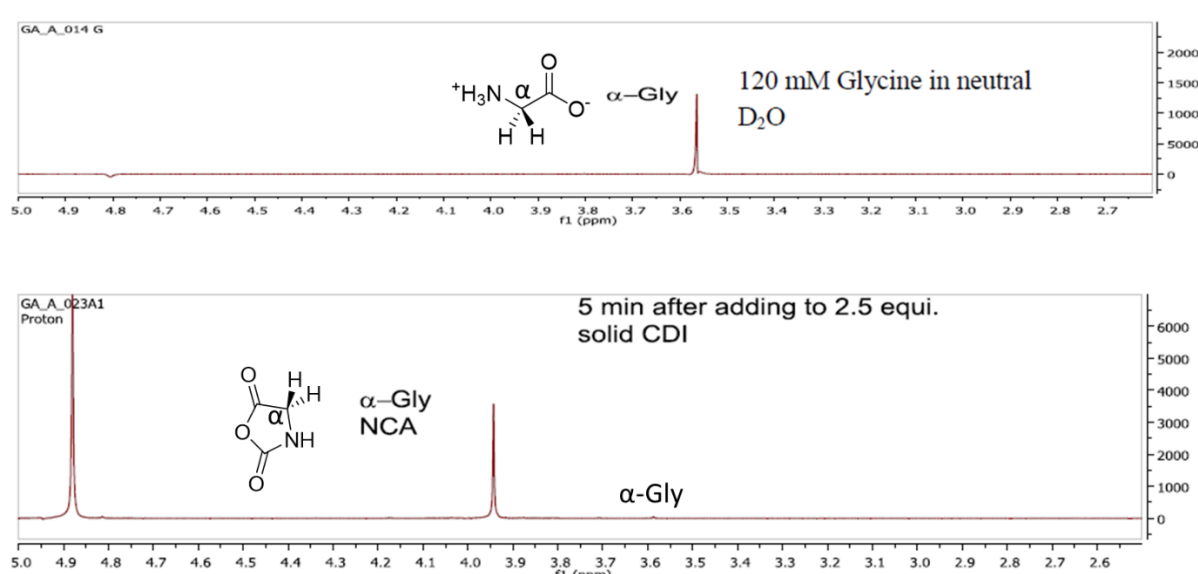

Figure S1.  $^1\text{H}$  NMR (300 MHz) of 120 mM glycine in  $\text{D}_2\text{O}$  recorded before (upper spectrum) and 5 minutes under agitation after the addition to 2.5 equivalents of solid CDI (lower spectrum). Residual HDO at  $\delta_{\text{H}} = 4.88$  ppm.



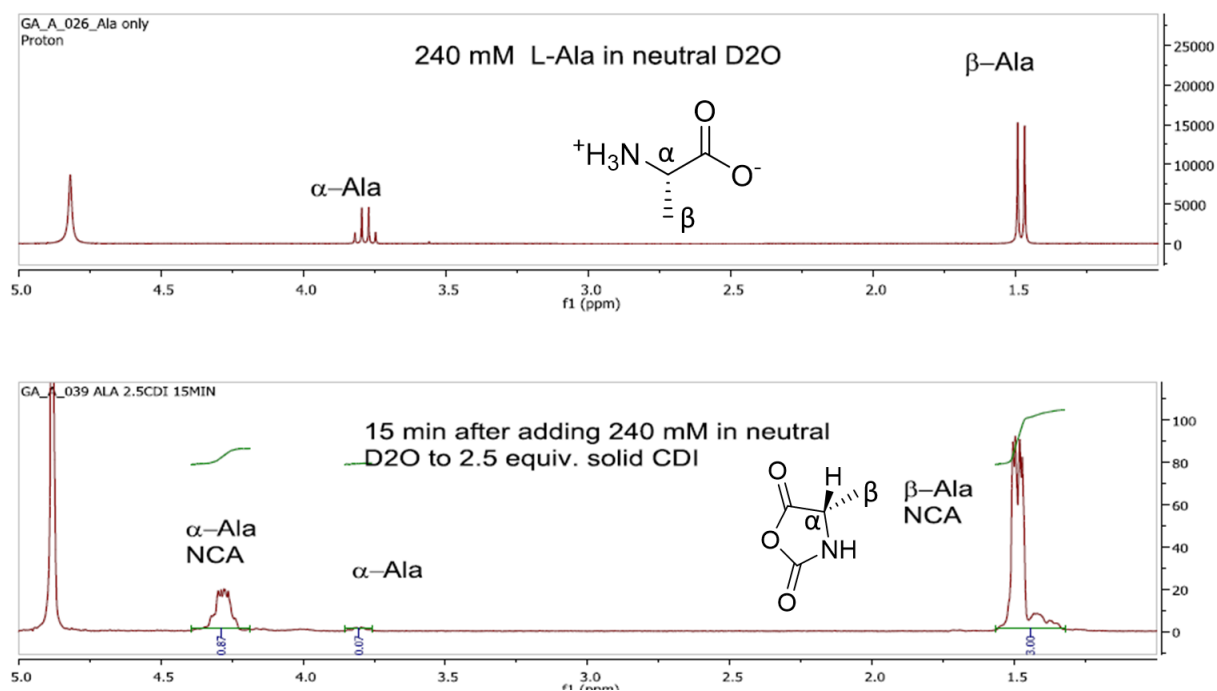

Figure S2. <sup>1</sup>H NMR (300 MHz) of 240 mM L-alanine in D<sub>2</sub>O recorded before (upper spectrum) and 15 minutes under agitation after the addition to 2.5 equivalents of solid CDI (lower spectrum).

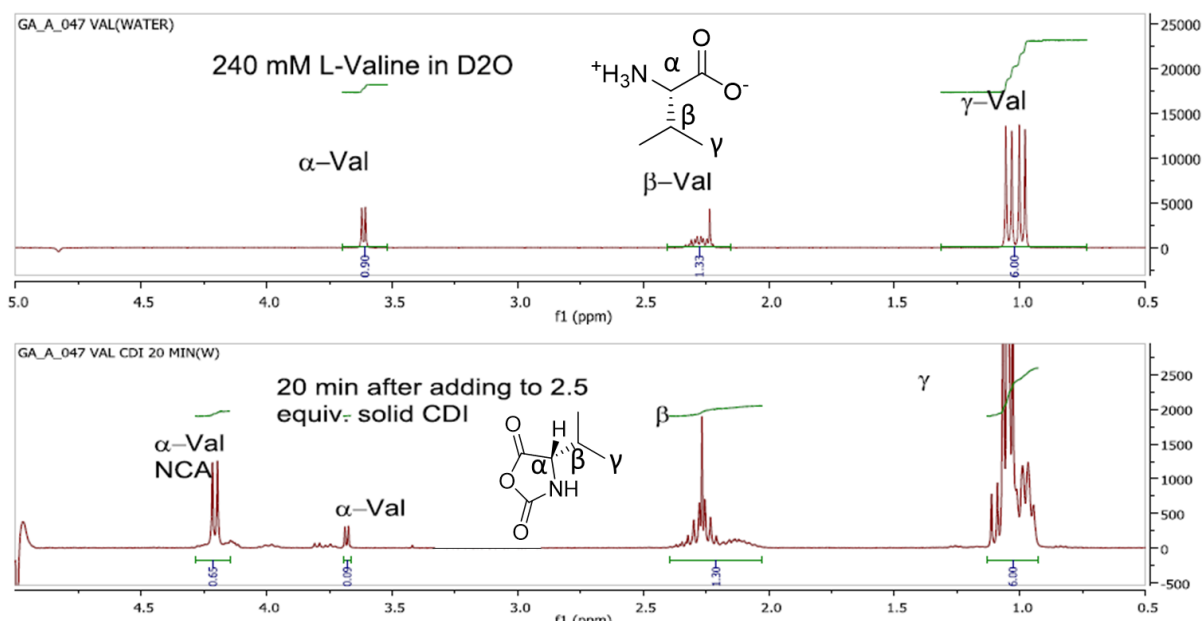

Figure S3. <sup>1</sup>H NMR (300 MHz) of 240 mM L-Valine in D<sub>2</sub>O recorded before (upper spectrum) and 20 minutes under agitation after the addition to 2.5 equivalents of solid CDI (lower spectrum).



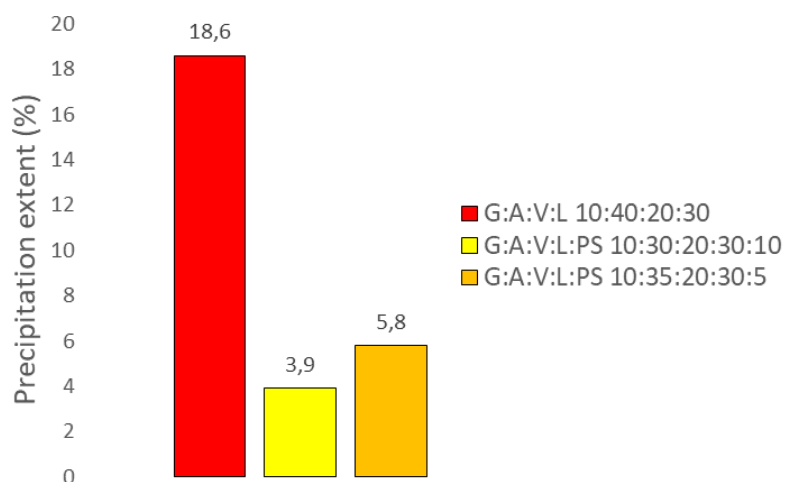

Figure S5. Precipitation extents of peptides generated from several combinations of amino acids: Glycine (G), alanine (A), valine (V), leucine (L) and *O*-phospho-serine (PS) (ratios given in molar percentage). In a combination containing only neutral and lipophilic amino acids (G:A:V:L) a relatively high extent of precipitation was observed for the peptides formed (around 19 %). The addition of a polar and charged amino acid (PS) at random positions allowed to decrease the precipitation extent.

Following the GMPP, the activations of 12 mM *O*-phospho-L-serine (PS) (Fig. S6) and 12 mM azido-L-alanine (AA) (Fig. S7) into their NCAs by 2.5 equivalents of CDI were assessed using  $^1\text{H}$  NMR spectroscopy.

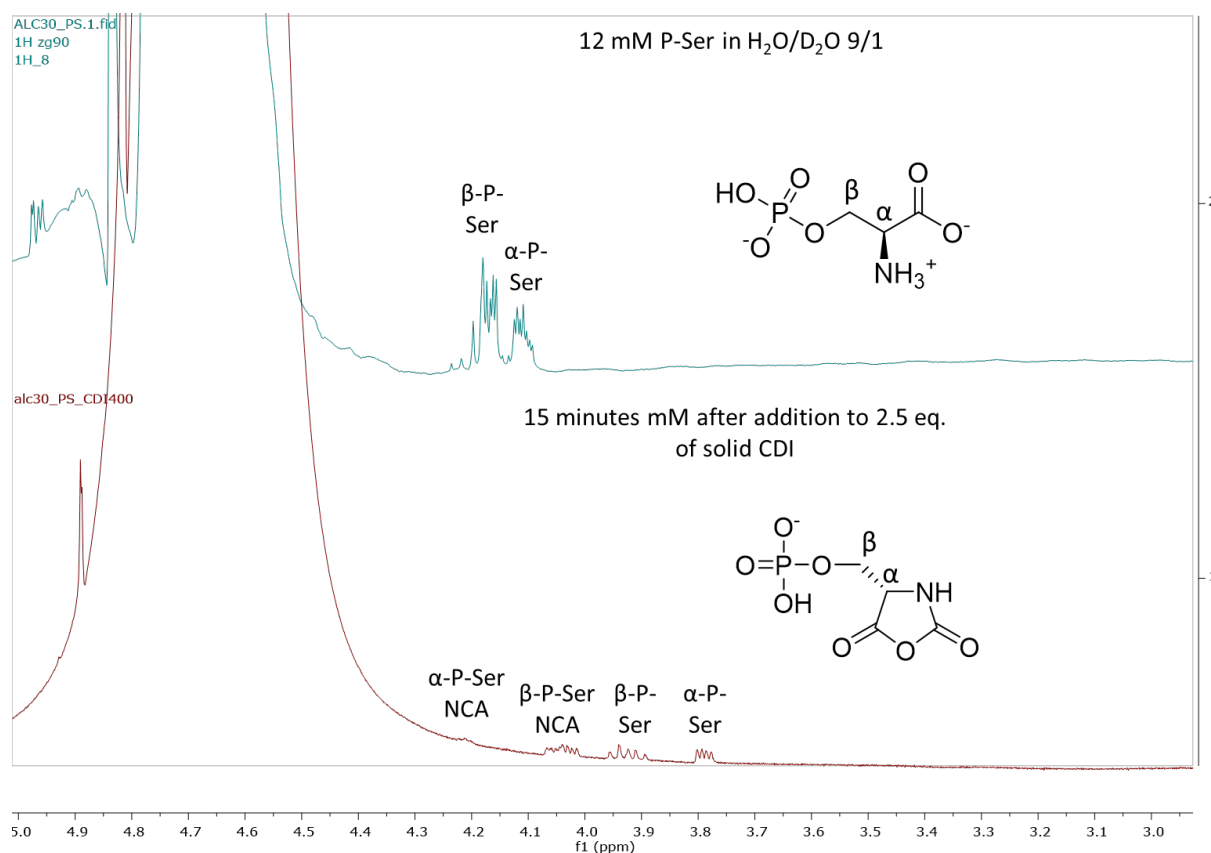

Figure S6.  $^1\text{H}$  NMR at 300 MHz and 400 MHz of 12 mM *O*-phospho-L-serine in  $\text{H}_2\text{O}/\text{D}_2\text{O}$  9:1 recorded before (upper spectrum) and 15 minutes under agitation after the addition of 2.5 equivalents of solid CDI (lower spectrum).

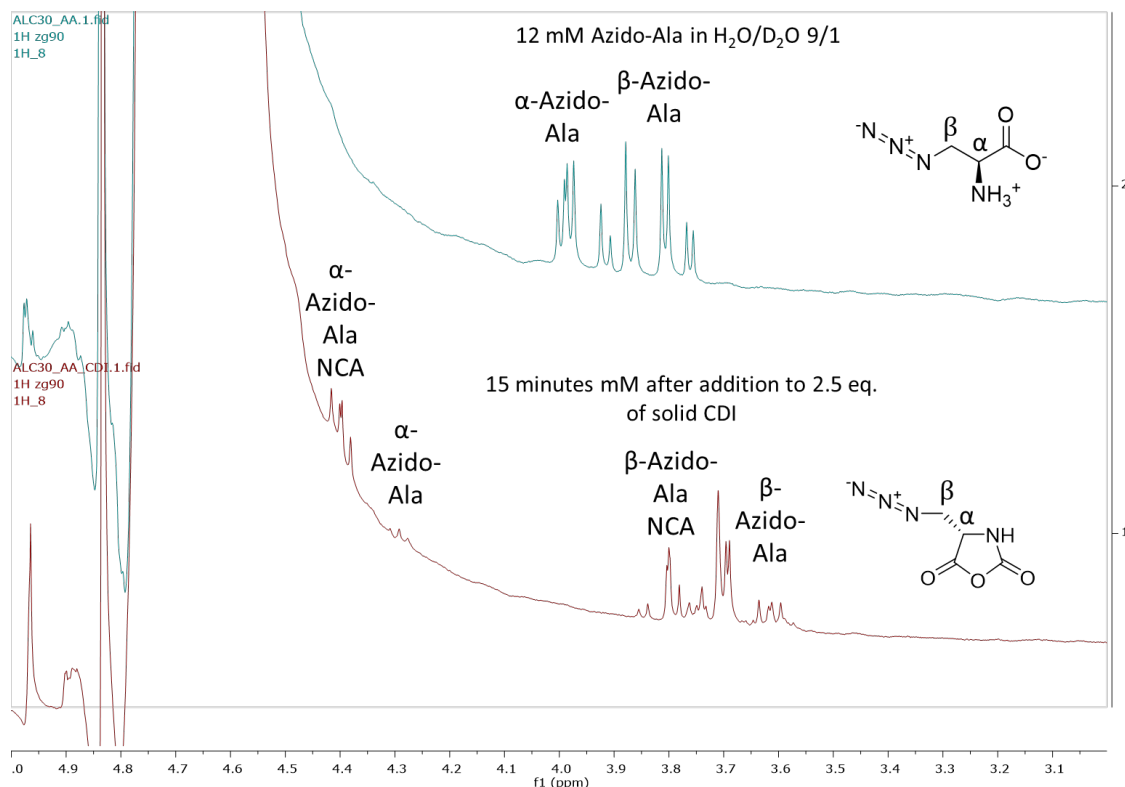

Figure S7.  $^1\text{H}$  NMR (300 MHz) of 12 mM azido-L-alanine in  $\text{H}_2\text{O}/\text{D}_2\text{O}$  9:1 recorded before (upper spectrum) and 15 minutes under agitation after the addition of 2.5 equivalents of solid CDI (lower spectrum).

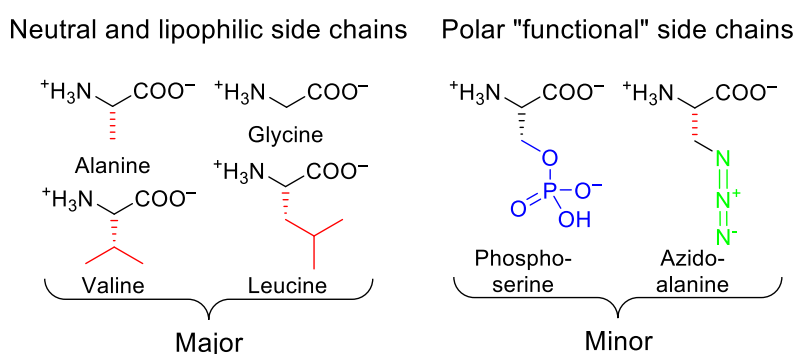

Figure S8. Structures of the amino acids selected for the production of lipophilic and prebiotic peptides.

In order to attribute the peaks found using NMR after activation, the NMR spectra were recorded before and after activation (Fig. S9). This information, in addition to the standards (Fig. S1-4, S6-7), enabled us to determine the origin of each peak in the region of interest. Then, the integration to calculate the activation and the oligomerisation extents could be performed (Fig. S10).

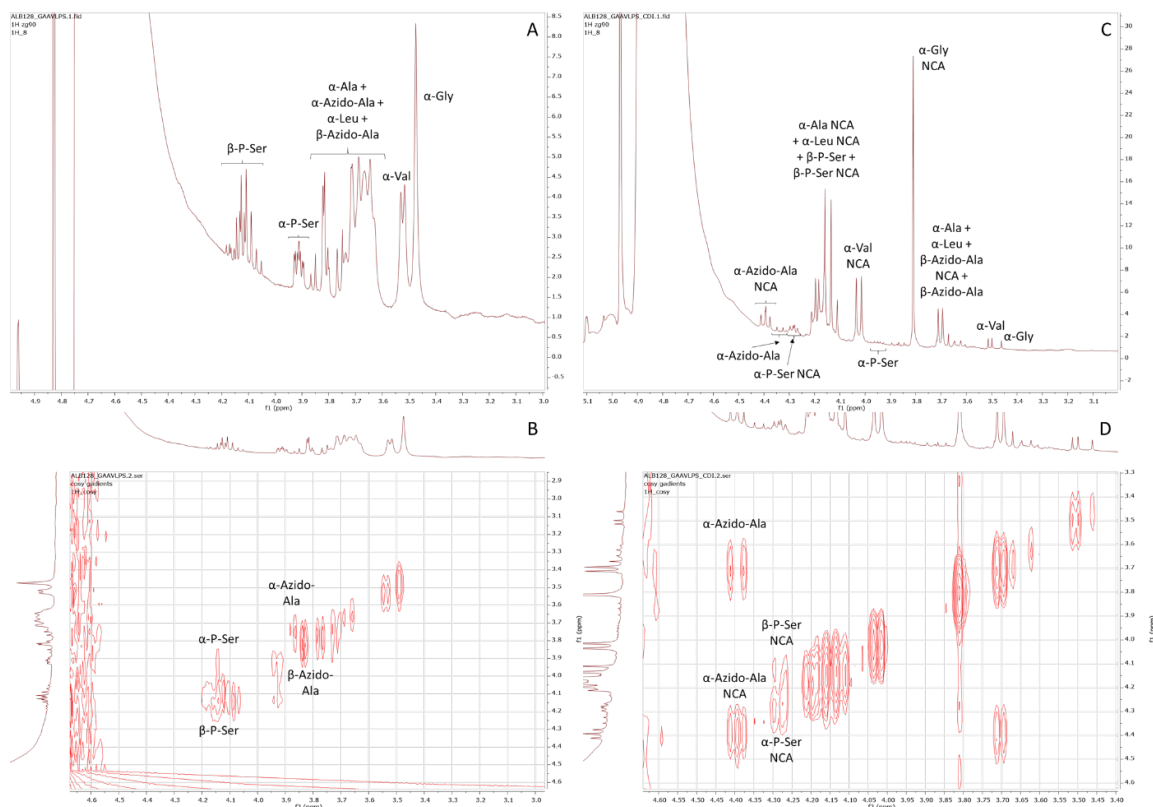

Figure S9.  $^1\text{H}$  NMR and COSY spectra (300 MHz) allowing the attribution of the peaks found after activation with CDI. **A)** Example of  $^1\text{H}$  NMR spectrum obtained from the GAVLPSAA combination before activation with CDI. The origin of all the peaks in the region of interest could be determined thanks to the standards (Fig. S1-4 and S6-7) and **B)** the corresponding COSY. **C)** Example of  $^1\text{H}$  NMR spectrum obtained from the GAVLPSAA combination after activation with CDI. The most important peaks in the region of interest could be attributed thanks to the standards (Fig. S1-4 and S6-7) and **D)** the corresponding COSY.

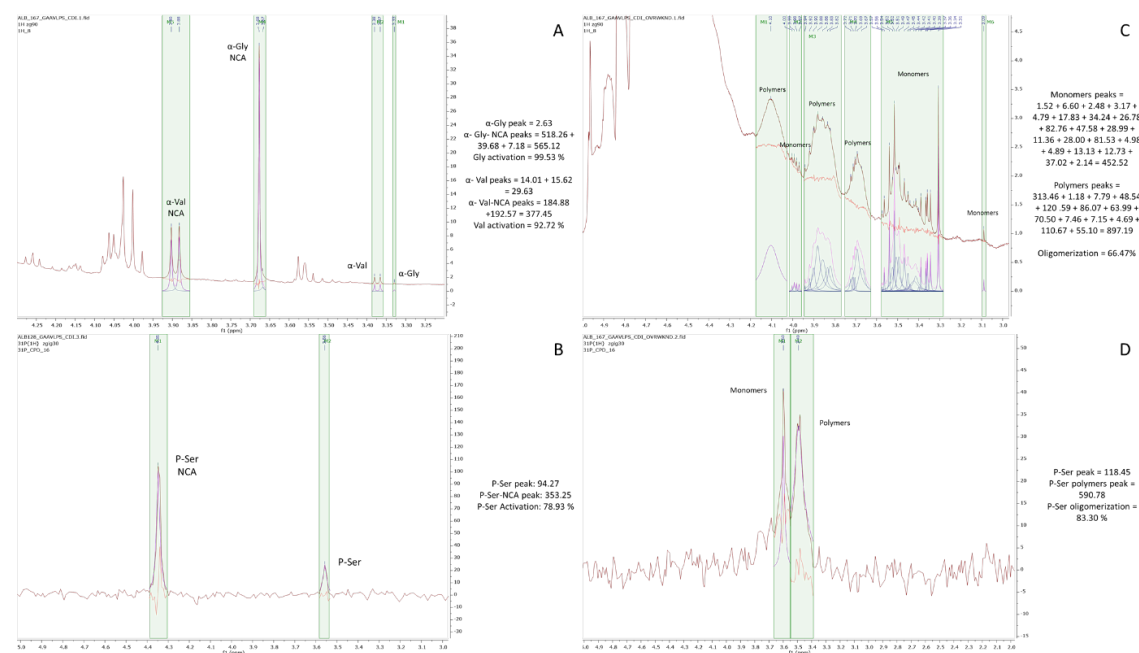

Figure S10. Examples of NMR spectra (**A, C**:  $^1\text{H}$ , 300 MHz and **B, D**:  $^{31}\text{P}$ , 120 MHz) and integration (area values) of deconvoluted peaks (Mestre software) used to calculate the (**A, B**) activation and (**C, D**) oligomerization extents of the different amino acids of the GAVLPSAA combinations.

## 2)2) MS characterizations of the random peptides generated in GAVLPSAA mixtures

The GAVLPSAA peptides were analysed using reversed-phase LC-ESI-MS (positive ion mode) with a C18 *Gemini*<sup>TM</sup> column (5  $\mu$ m, 250  $\times$  4.6 mm, *Phenomenex*<sup>®</sup>). Eluants A (5 mM NH<sub>4</sub>OAc in H<sub>2</sub>O) and B (CH<sub>3</sub>CN/A 95:5) were used with various linear binary gradients operating from 2 % B to 50 % B in 30 min at 1.0 mL/min (Fig. S11, see below and the following 3 pages).

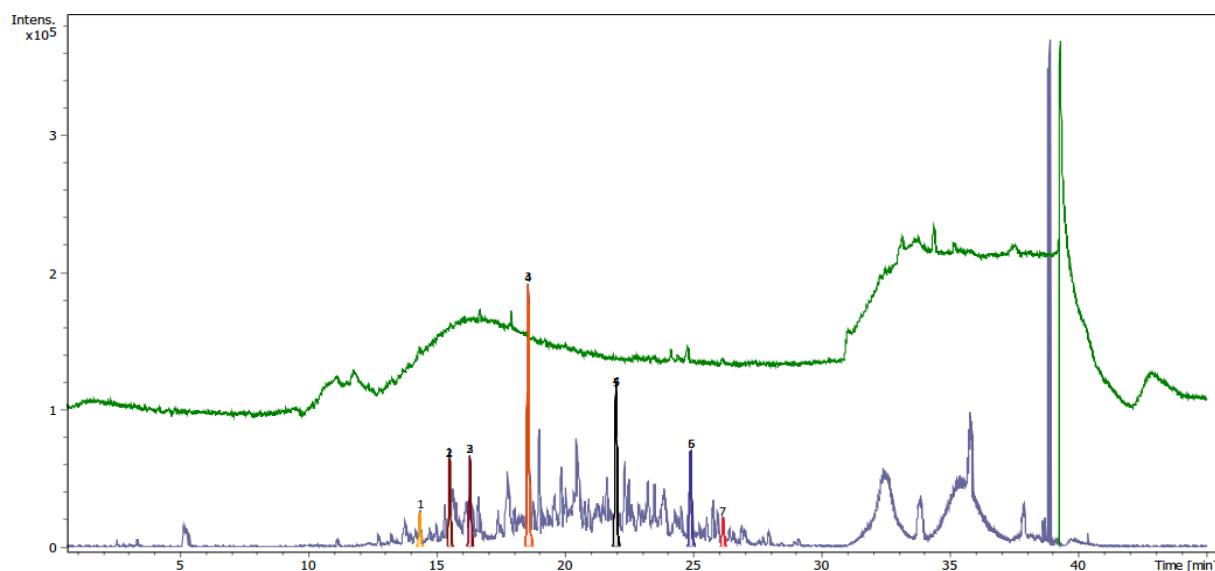

### ■ Composé 1 - Tr = 14.5 min

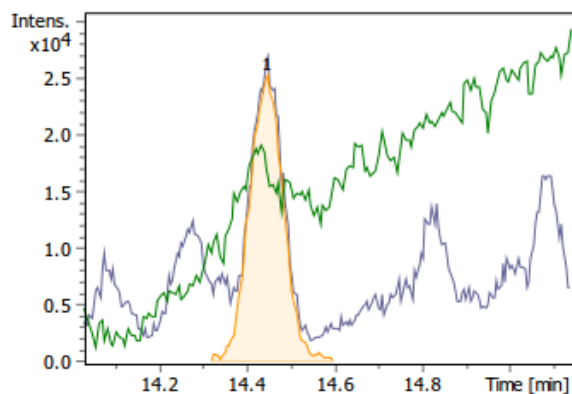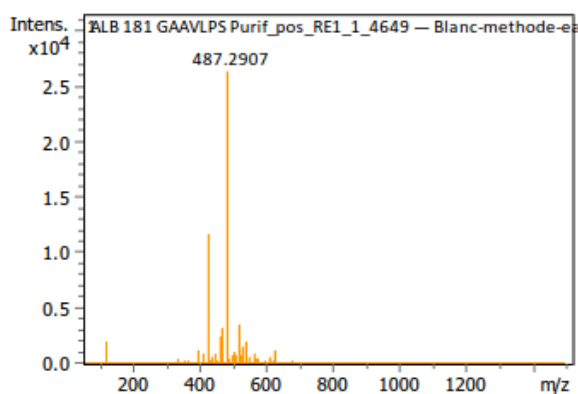

Unidentified compound

■ Composé 2 - Tr = 15.6 min

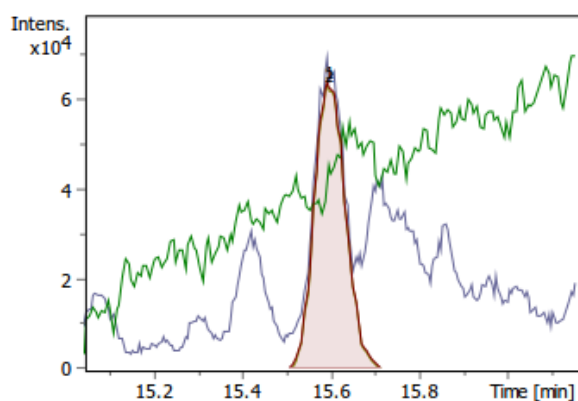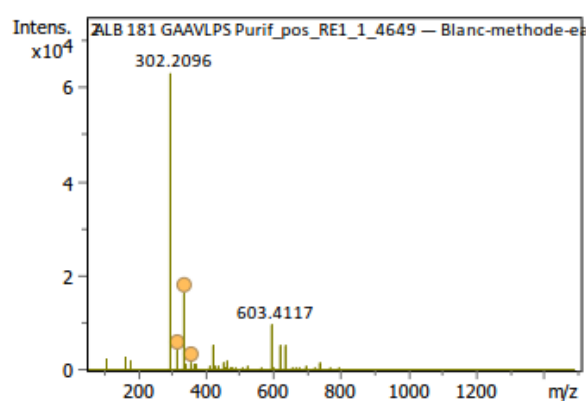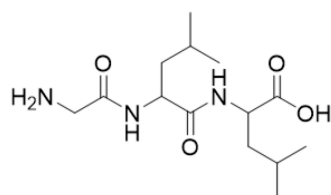

Chemical Formula: C<sub>14</sub>H<sub>27</sub>N<sub>3</sub>O<sub>4</sub>  
Exact Mass: 301,20

Gly-Leu-Leu (or Leu-Gly-Leu or Leu-Leu-Gly)

■ Composé 3 - Tr = 16.4 min

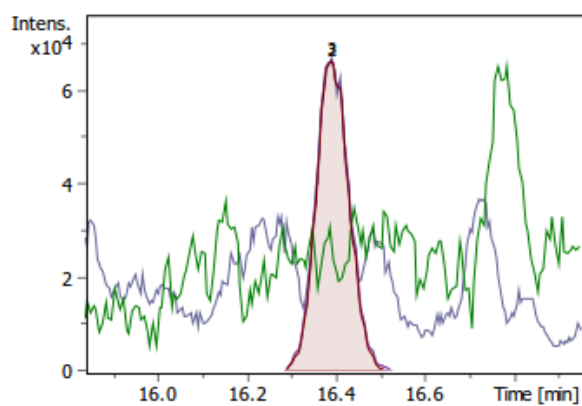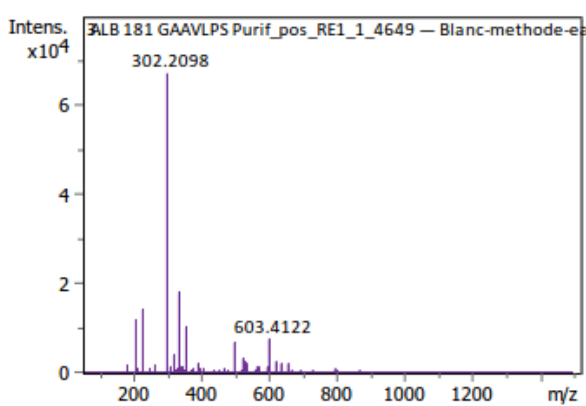

Gly-Leu-Leu (or Leu-Gly-Leu or Leu-Leu-Gly)

▪ Composé 4 - Tr = 18.7 min

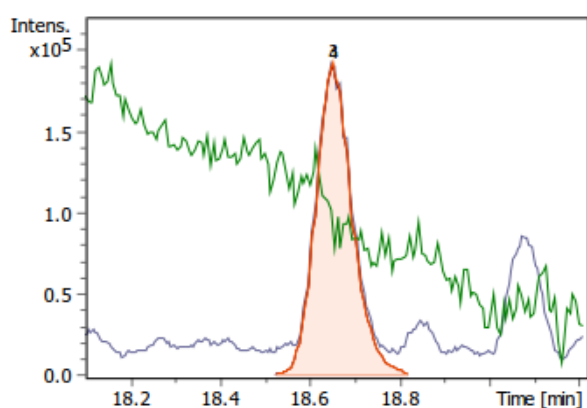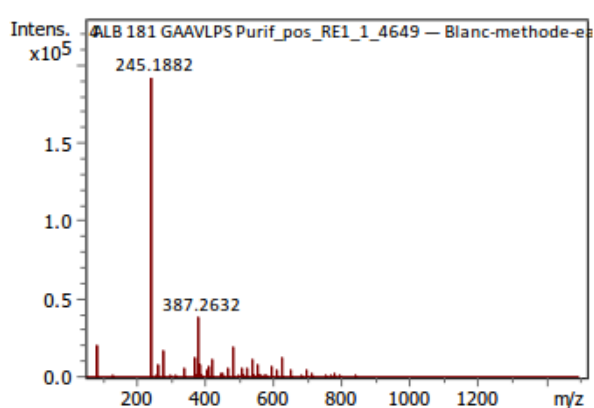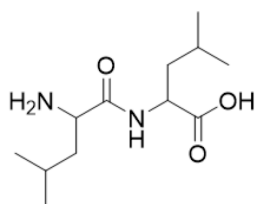

Chemical Formula: C<sub>12</sub>H<sub>24</sub>N<sub>2</sub>O<sub>3</sub>  
Exact Mass: 244,18

Leu-Leu

▪ Composé 5 - Tr = 22.1 min

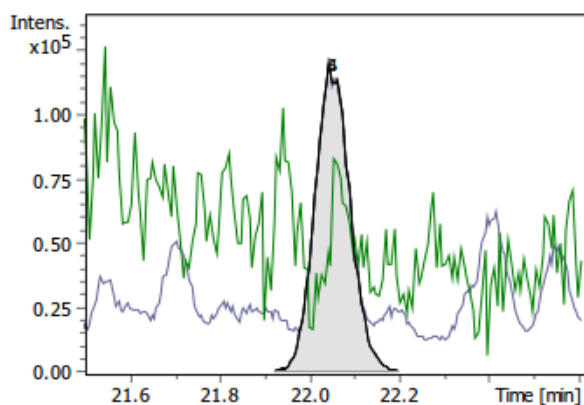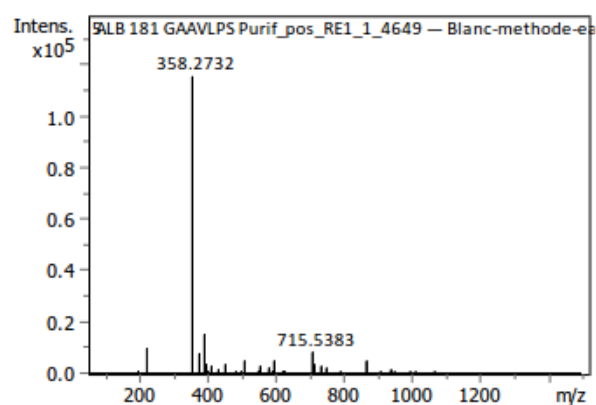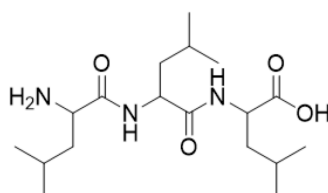

Chemical Formula: C<sub>18</sub>H<sub>35</sub>N<sub>3</sub>O<sub>4</sub>  
Exact Mass: 357,26

Leu-Leu-Leu



▪ Composé 6 - Tr = 25.0 min

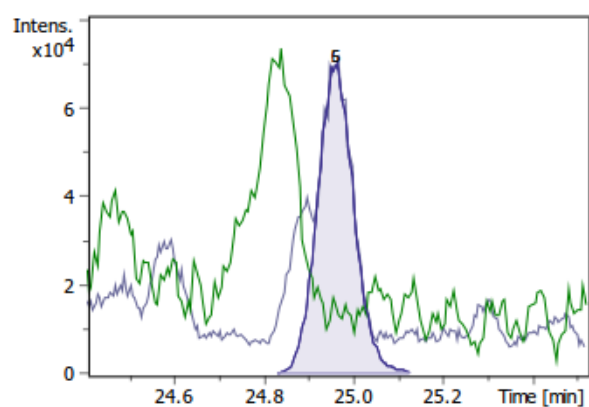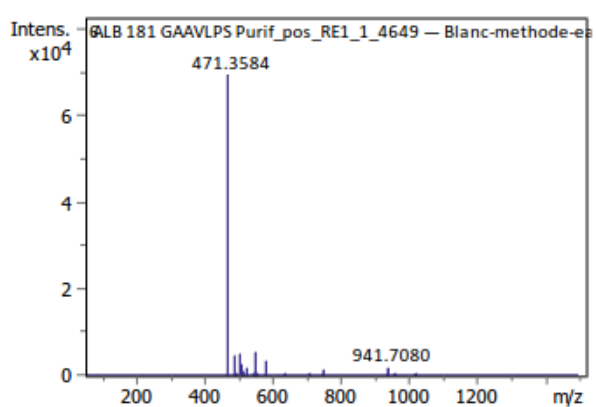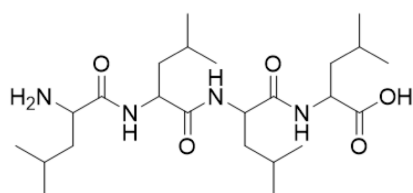

Chemical Formula: C<sub>24</sub>H<sub>46</sub>N<sub>4</sub>O<sub>5</sub>  
Exact Mass: 470,35

Leu-Leu-Leu-Leu

The size of the peptides present was obtained using ion-extraction of the LC-ESI-MS integrating the area of ten intervals of masses that represented the estimated average masses of the peptides generated from GAVLPSAA mixtures (Fig. S12).

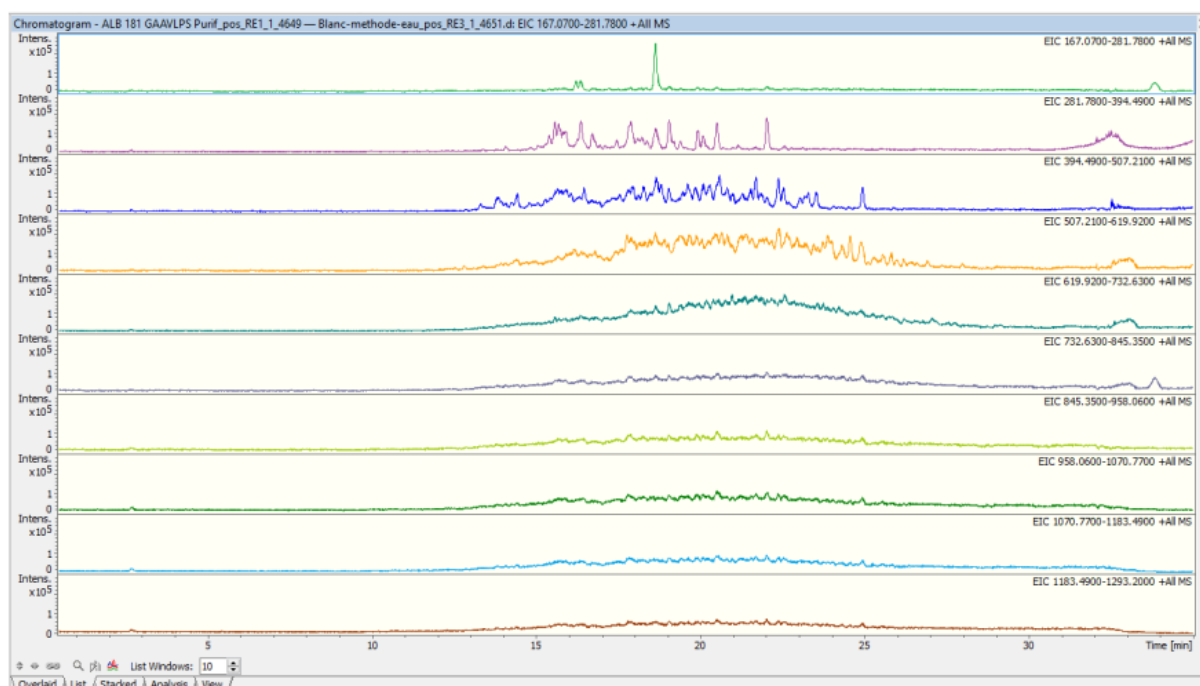

Figure S12. LC-ESI-MS in positive ion mode: extracted ion chromatograms (EICs) for ten ranges of extracted masses representing the estimated average mono-charged masses of short peptides generated from GAVLPSAA combinations; from average-molecular-weight 2-mers (top EIC) to average-MW 11-mers (bottom EIC). The integrated areas of each mass range, cf. upper right { $m/z$  range, area} values for each EIC range, are depicted in a histogram in Fig. 3B.

GAVLPSAA mixtures were also analysed using MALDI-ToF-MS. For such analyses, most of the imidazole was separated from peptides using chromatography using a Sephadex G-10 column. The supernatant of the GAVLPSAA mixture was analysed as such, whereas the pellet was first dissolved in pure trifluoroacetic acid (1 mg pellet in 10  $\mu$ L TFA). Then, these 10  $\mu$ L were added to 990  $\mu$ L of H<sub>2</sub>O for the MS analysis (Fig. S13).

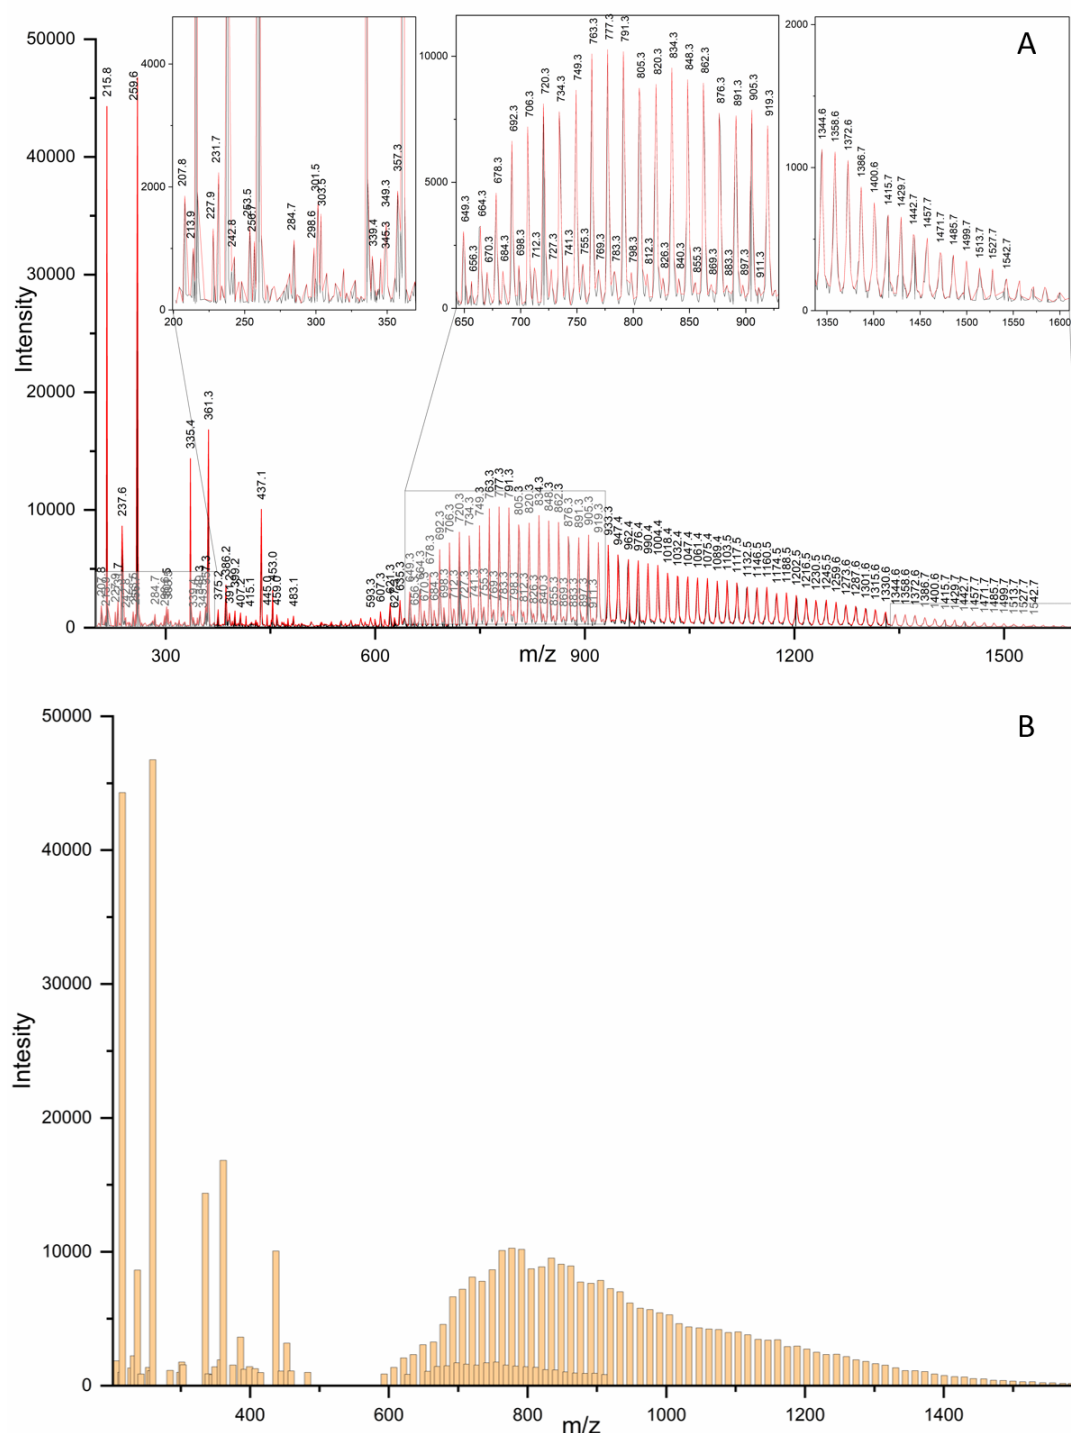

Figure S13. MALDI-ToF-MS analysis was performed on GAVLPSAA mixtures on the pellet isolated using centrifugation, after polymerization mediated by CDI and purification through a Sephadex G-10 column. The raw data (black line in inserts) was convoluted to depict **A**) groups of single peaks each within 5 Da (red lines) and **B**) a histogram gathering two sub-populations of peaks in a same range.

## 2)3) HPLC characterizations of the random peptides generated in GAVLPSAA mixtures (click reactions)

In order to assess the presence of azido-alanine in the random GAVLPSAA peptides, clicked reactions with cyclooctyne-containing fluorophores (DBCO-AF488 and DBCO-PEG<sub>4</sub>-5/6-FAM) were performed, but first we carried out control reactions with pure azido-alanine (Scheme S2).

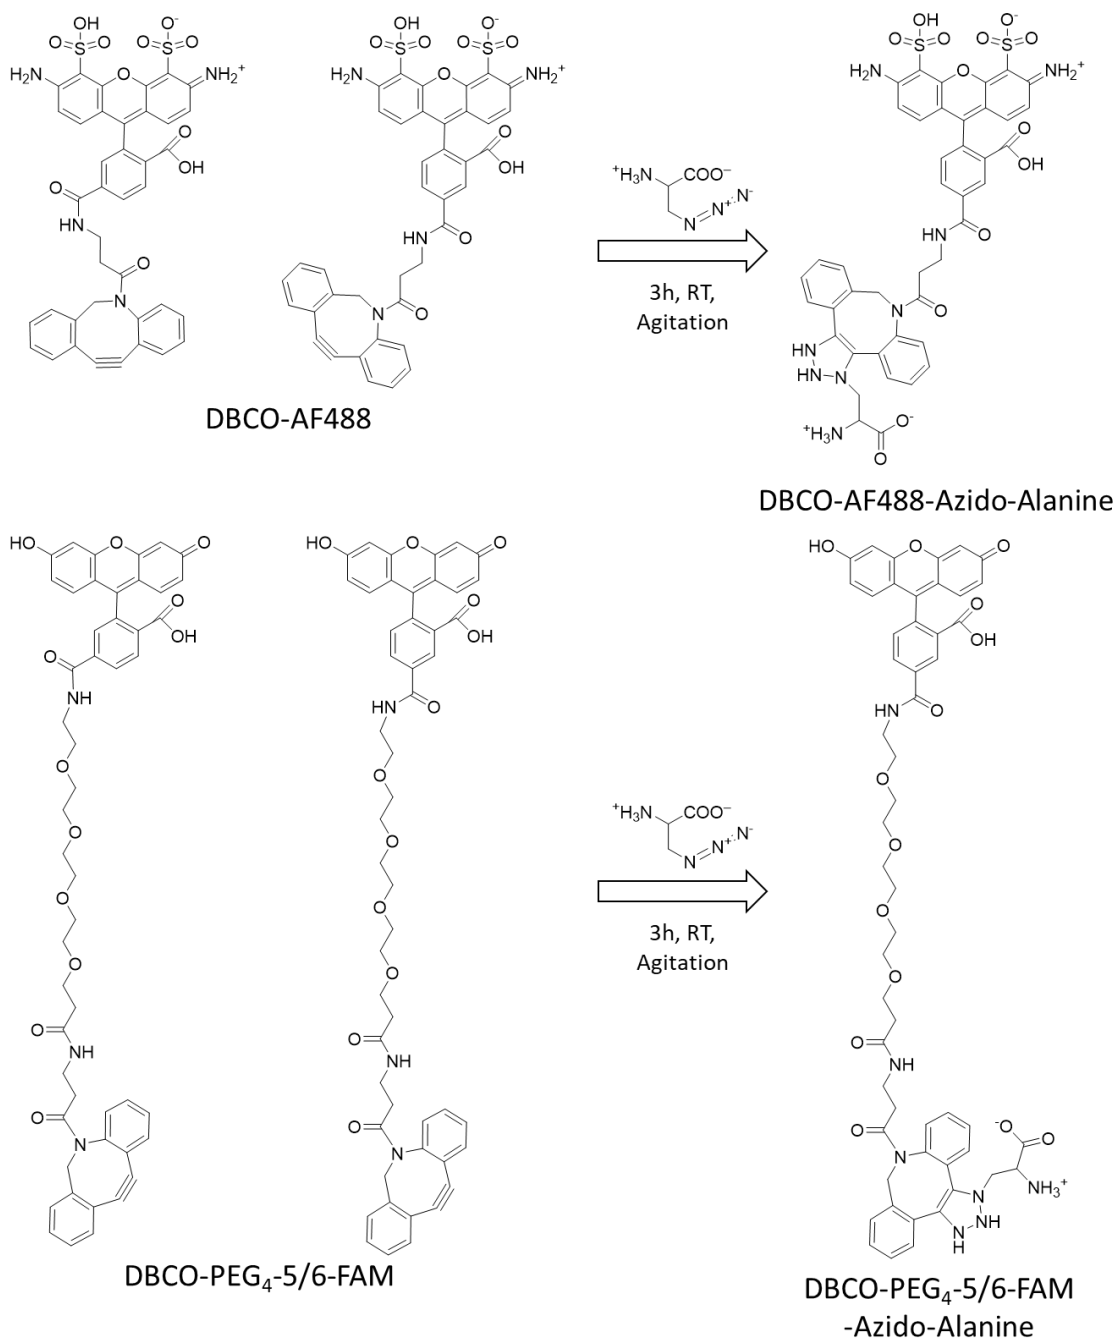

Scheme S2. Click reactions between two fluorescent clickable hydrophilic probes: DBCO-AF488 and DBCO-PEG<sub>4</sub>-5/6-FAM (isomer mixtures shown only for the unclicked) and azido-alanine yielding a fluorescent modified amino acid. If azido-alanine is present inside peptides (as in GAVLPSAA mixtures), then fluorescent peptides can be yielded in this way. These reactions were performed with 50  $\mu\text{M}$  fluorescent probe and 1 mM azido-alanine during 3 h at room temperature under slow agitation (300 RPM).

The result of the reaction and the other click-reactions was analysed by RP-HPLC using a *Gemini*<sup>TM</sup> C18 column (250 × 4.6 mm, 5 µm, *Phenomenex*<sup>®</sup>). The fluorescent compounds were separated with a binary linear gradient from 2 to 56 % B in 27 min at 1.0 mL/min using eluants A) 5 mM NH<sub>4</sub>OAc pH 8.0 and B) CH<sub>3</sub>CN/A 95:5 and detected using fluorescence at 517 nm emission wavelength (excited at 493 nm).

Both probes were diluted 20 times in 1 mL of HPLC eluent A from concentrated solutions in DMSO (1 mM, 1 mg in 1.26 mL DMSO (DBCO-AF488) or 1 mg in 1.13 mL DMSO (DBCO-PEG<sub>4</sub>-5/6-FAM)) (50 µM final concentration after dilution). Then, they were separately injected as HPLC references. Azido-alanine was added through a 10-fold dilution in eluent A (10 mM, 1.30 mg in 1 mL) (1 mM final concentration after dilution) to these solutions to yield the clicked fluorescent amino acid. After 3 h at RT and under slow agitation (300 rpm), these solutions were injected and analysed similarly using HPLC (Fig. 4A). Moreover, both probes (50 µM each) were separately and independently incubated in similar conditions with around 20 mM GAVLPSAA solution (thus, the concentration of azido-alanine should be more or less of 1 mM), in order to generate clicked peptides. To estimate the concentration of peptides in solution after polymerisation with CDI, the amount of salts, imidazole, non-polymerised amino acids (obtained with the oligomerisation extent of all amino acids previously determined (Fig. 2F) and the average masses of the obtained peptides (≈ 600 Da, Fig. 3) were all taken into account. In the end, 9.70 mg lyophilised GAVLPSAA mixtures were dissolved in 1 mL eluent A to yield a solution of about 50 mM and diluted 2.5 times when added to the probes in 1 mL eluent A (20 mM final concentration in 1 mL, final volume). The reaction was left for 3 h at RT under slow agitation (300 rpm). In order to highlight the diversity of the clicked peptides generated, spiking experiments were performed. To do so, 5 µL of the previous reaction solutions (GAVLPSAA + probes) were injected with 0.5 µL of the probes alone (50 µM) or with 0.5 µL of the probes clicked with azido-alanine (50 µM and 1 mM respectively) (Fig. S14).

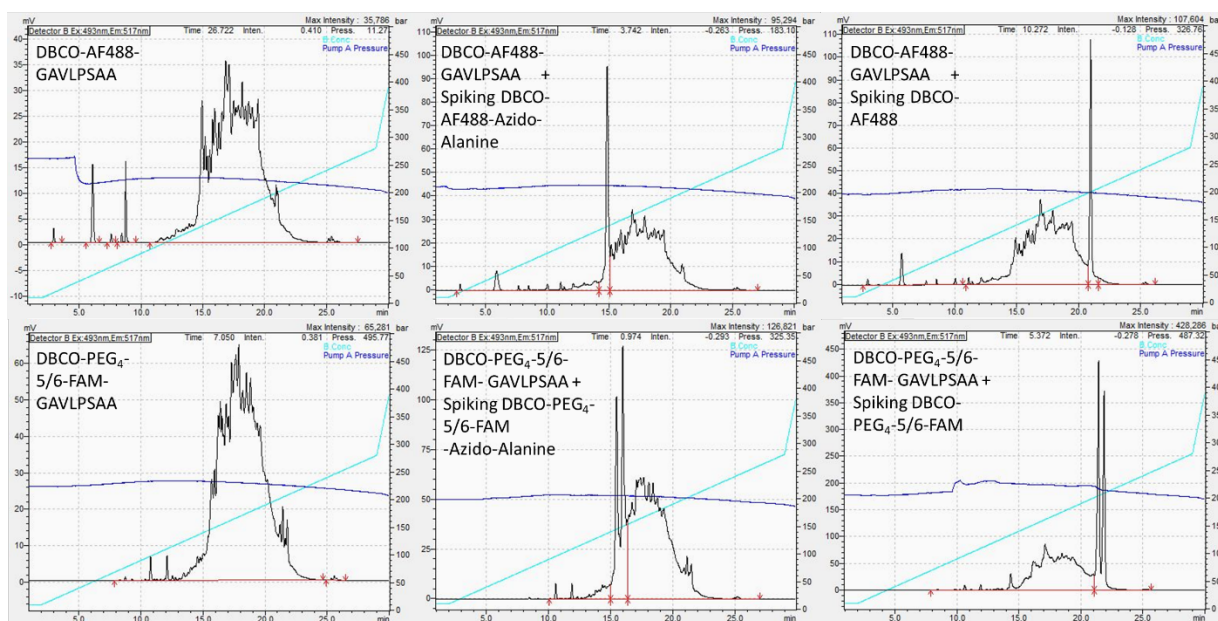

Figure S14. HPLC chromatograms obtained by fluorescence detection (493/517 nm excit/em) from spiking injections after reaction of GAVLPSAA with the clickable fluorescent probes (left column). Spiking with azido-alanine clicked to the probe of interest (central column) and with the probe of interest alone (right column) showed that many GAVLPSAA peptides contained azido-alanine and were able to click to the fluorescent probes.

After the reactions of GAVLPSAA mixture with the fluorescent probes, 50 µM of both fluorescent probes were separately added from concentrated solutions and a second click reaction was left overnight at room temperature under slow agitation (300 rpm). The day after, both solutions were

injected using HPLC and showed that more azido-alanine-containing peptides were still available for the click reaction to occur (Fig. S15).

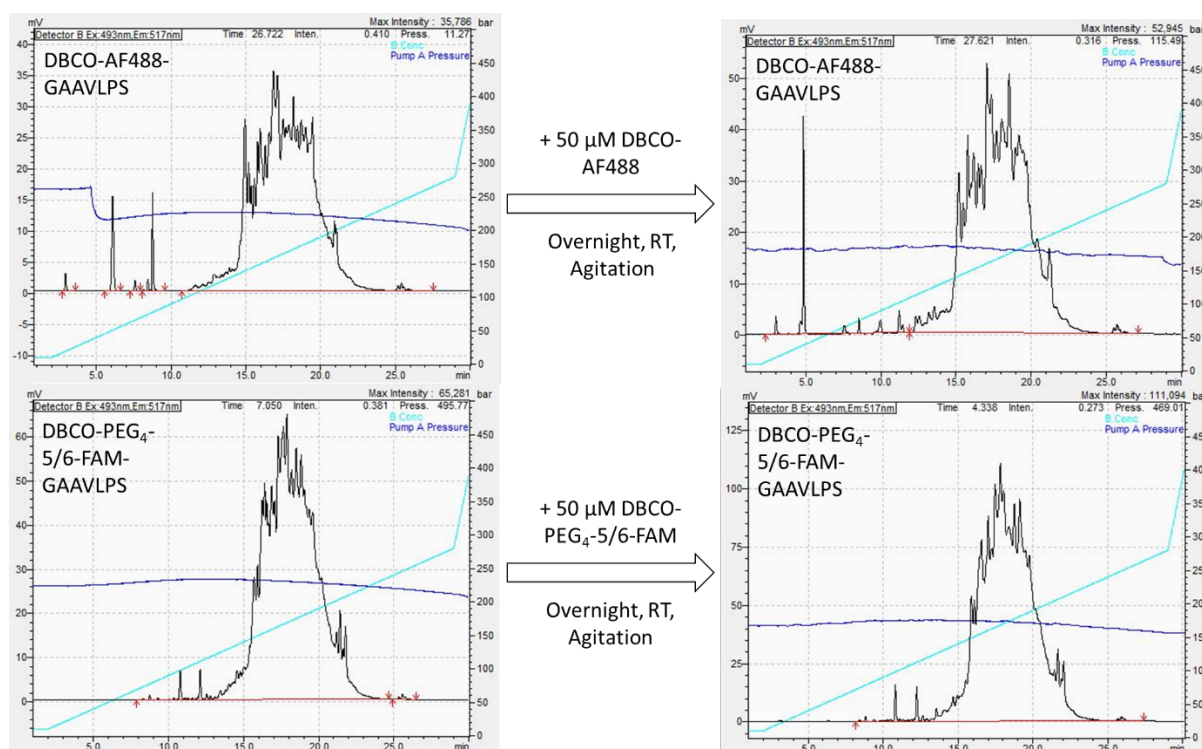

Figure S15. HPLC chromatograms obtained using fluorescence detection (493/517 nm excit/em) before and after a second click reaction. Additional fluorescent probes (50  $\mu$ M) were added to clicked GAVLPSAA mixtures (left part) and the reaction was left overnight at RT under slow agitation (300 rpm). Then, the resulting mixtures were analysed using HPLC (right part). All the additional added probes were consumed yielding more GAVLPSAA fluorescent peptides.

### 3) Supplementary information to: Coupling attempts of peptides with oligonucleotides in prebiotic conditions compatible with the presence of lipidic giant vesicles

The prebiotic coupling reaction investigated corresponded to the formation of peptido-oligonucleotides after the activation of the terminal phosphate of oligonucleotides with the action of EDC. The additional step involving the formation of another intermediate after addition of the nucleophilic catalyst was omitted for simplicity (Scheme S3).

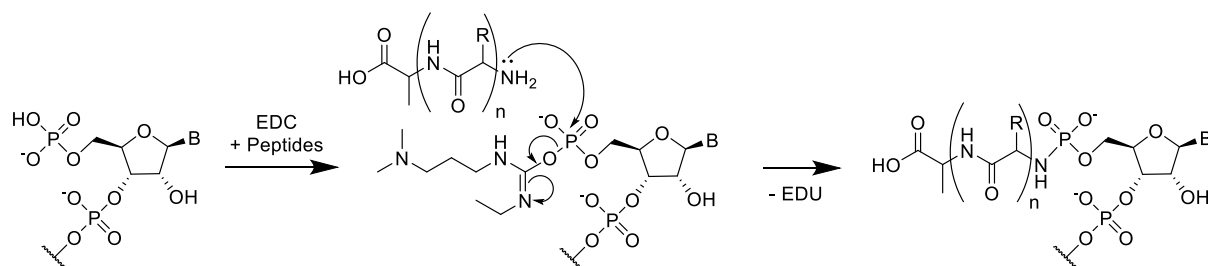

Scheme S3. The formation of peptide-oligonucleotides, as vectors of peptides and oligonucleotides to get inside lipidic giant vesicles, was studied in the case of peptido-oligonucleotides with 5'-phosphorylated oligonucleotides. Such conjugates (chimeras) should be obtained after activation of the 5'-oligonucleotide phosphate by a coupling agent such as EDC. B stands for nucleobase.

### 3)1) pUGGU RNA production and analysis

First of all, it was necessary to produce the 5'-phosphorylated 4-mer RNA pUGGU used as a standard for all coupling experiments. The solid-supported synthesis of the oligonucleotide was achieved with a default program (DMT-OFF) containing small modifications allowing to increase the stepwise and overall yields. The standard 10  $\mu$ mole scale-cycle was used on an amount of commercial solid support that was charged with 6  $\mu$ mol of the first (3'-terminal) nucleoside and using a 10  $\mu$ mole-scale column in order to increase the overall yields. With the same aim, an additional capping step was introduced after the aqueous iodine oxidation step, making the solid-support more anhydrous for the subsequent detritylation and coupling. Additional washings with DCM were also added before and after detritylation to minimize the chances of detritylating added phosphoramidite monomers before they would couple to the solid-support. Besides, the waiting times were increased to 15 min for the activation/coupling of monomers.

The de-immobilizations and deprotections were performed on a 2  $\mu$ mole scale (1 eq.). The corresponding amount of resin obtained after solid-phase synthesis was taken and 0.5 mL of aqueous ammonia solution (35 % v/v) then 0.5 mL of ethanolic methylamine solution (33 % v/v) were added (around 500 eq. each) [1]. The deprotection reaction was performed in closed Eppendorf vials placed in a thermomixer heating at 65°C and 400 rpm during 20 min. Then, the Eppendorf vial was cooled down for 30 min in an ice bath and the supernatant containing the free RNA was collected. In order to recover most of the deprotected and de-immobilized oligonucleotides, the resin was washed 4 times (500  $\mu$ L of ultrapure water added, brief vortex and supernatant collected). Next, the Eppendorf was placed in a Speedvac for 20 min at 43°C to get rid of the organic solvents. Thereafter, the residual water was removed by an overnight (around 16 h) lyophilization. 0.7 mL of Et<sub>3</sub>N-3HF was added (around 500 eq.) on the lyophilised pellet and the sample was treated in a thermomixer at 65°C for 1.5 h [2]. Again, the Eppendorf vial was cooled down in an ice bath for 30 min. The sample liquid was added to 5 mL neat methoxytrimethylsilane to remove all excess fluoride as gaseous trimethylsilyl fluoride (and methanol) formed [3]. Afterwards, the sample was vortexed for 2 min and the organic volatiles (Et<sub>3</sub>N, MeOH) were evaporated for 20 min in a Speedvac at 43°C. Finally, the yellow pellet was dissolved in 1 mL of ultrapure water and lyophilised overnight to get rid of any residual organic volatile leftovers. The lyophilised pellets were stored at -80°C before purification.

*Clarity Oligo-RP*<sup>TM</sup> columns from *Phenomenex*<sup>®</sup> (5  $\mu$ m, 250×10 mm, for the semi-preparative column and 5  $\mu$ m, 250×4.6 mm for the analytical column) were used for the separation or the purity analysis of the oligonucleotide. It was purified using semi-preparative RP-HPLC at 5.0 mL/min and 60°C column temperature using a binary gradient of A) 10 mM NH<sub>4</sub>OAc pH 8.0 and B) CH<sub>3</sub>CN/A 95:5. The purity of the oligonucleotide HPLC fractions were assessed using analytical RP-HPLC at 1.0 mL/min and 60°C using 260 nm UV detection. The gradients used varied from 2 to 8 % of B in 8 min. The yield of the oligonucleotide was calculated using the optical density at 260 nm. For that, the absorbance A<sub>260</sub> of the pure sample obtained after HPLC separation was measured and the corresponding yield was calculated with OligoCalc<sup>TM</sup> (Fig. S16).



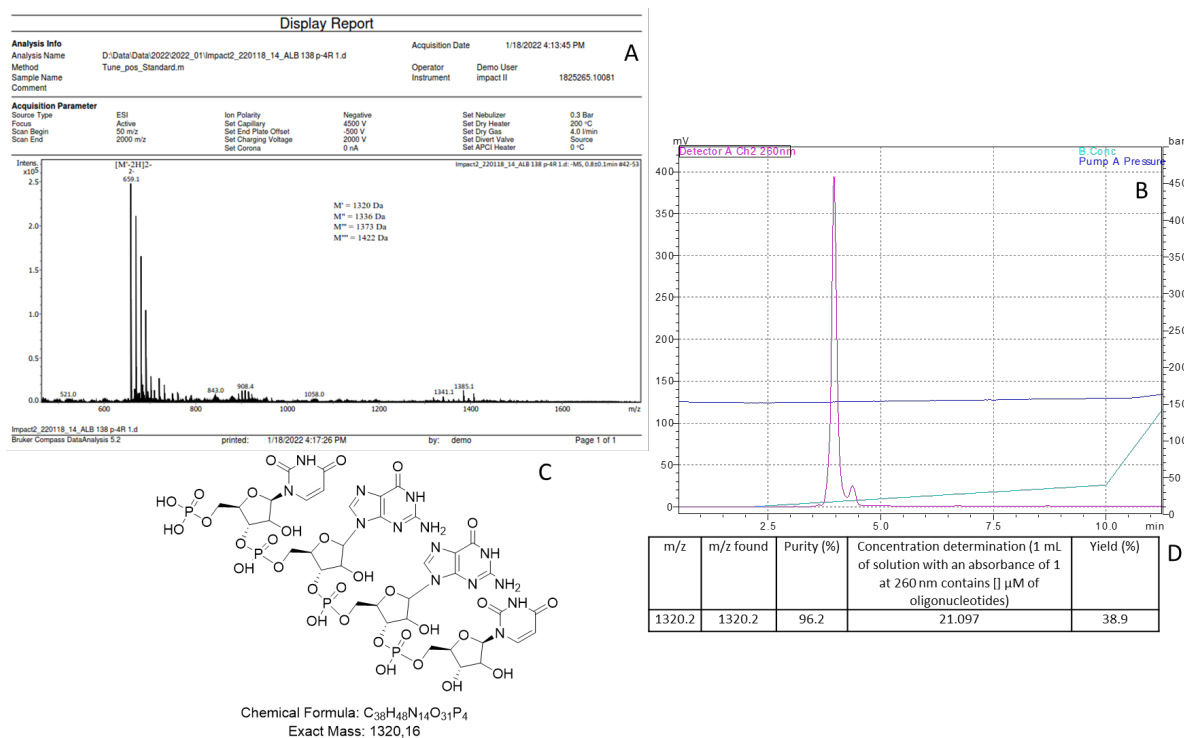

Figure S16. Chemical analysis of the RNA 4-mer pUGGU produced. **A**) MS analysis (negative ion mode, main compound found as dianion), **B**) UV chromatogram (260 nm) and **C**) chemical structure, formula and molecular weight of the main compound. **D**) Table showing  $m/z$  ratio calculated for the main oligonucleotide,  $m/z$  of the product found by MS analysis (both for  $z = -1$  (mono-anion)), the purity (determined from the UV chromatogram), the micromolar concentration of an oligonucleotide solution in 1 mL to have an absorbance  $A_{260} = 1.000$  through 1 cm path length (calculated with OligoCalc™) and the yield calculated from the absorption coefficient and the  $A_{260}$ .

### 3)2) Coupling attempts and vesicles production in the presence of EDC and EtIm

The coupling experiments between the RNA pUGGU and GAVLPSAA peptides were performed in 2 steps:

**Activation step:** The previously synthesized RNA pUGGU (50  $\mu$ M, 1 eq, concentration calculated from the UV absorbance at 260 nm and the online service OligoCalc™) was added to 7.5 equivalents of EtIm (375  $\mu$ M, 3.60 mg in 1 mL of ultrapure water for a concentrated solution of 37.5 mM later diluted 100 times to reach the desired concentration) in ultrapure water. Then, the pH was adjusted to 7.5 (A1 experiment) or 8.0 (A2 experiment) adding 100 mM HCl. Afterwards, 20 equivalents of EDC (1 mM, A1 experiment) or 40 equivalents of EDC (2 mM, A2 experiment) were added from a concentrated solution (10 mM, 1.55 mg in 1 mL). Eventually, the pH was adjusted to 7.5 (A1 experiment) or 8.0 (A2 experiment) by adding 100 mM NaOH. The activation reaction was left for 2 h (A1 experiment) or 192 h (A2 experiment).

**Incubation step:** After activation, 20 “equivalents” (1 mM, A1 experiment) or 60 “equivalents” (3 mM, A2 experiment) of the GAVLPSAA mixture were added from a concentrated solution (50 mM, 9.70 mg of lyophilized GAVLPSAA mixtures in 1 mL of ultrapure water) to the activated oligonucleotides. Importantly, the concentration of added peptides refers to an estimation. The amount of peptides in solution after polymerization with CDI could be estimated taking into account the amount of salts, imidazole, non-polymerized amino acids (obtained with the oligomerization extent of all amino acids



previously determined (Fig. 1F)) and the average masses of the peptides yielded ( $\approx 600$  Da, Fig. 2). The pH was then adjusted to 7.5 (A1 experiment) or 8.0 (A2 experiment) adding 100 mM HCl. In the A2 experiment, 1 mM EDC was also added with the second step (from a concentrated solution, similarly as described previously) in order to favor the reaction. The reactions were then left in an Eppendorf vial for 120 h (A1 experiment) or 360 h (A2 experiment) at ambient temperature and without shaking. The pH was checked regularly and remained stable around the pH set after the addition of GAVLPsAA mixtures. 50  $\mu$ L of the solutions were sampled during the reaction or at least the end of the incubation for LC-MS analysis.

All the products of reaction were analyzed using LC-MS using a *Gemini*<sup>TM</sup> C18 column (250  $\times$  4.6 mm, 5  $\mu$ m, *Phenomenex*<sup>®</sup>). The oligonucleotides were separated at 1.0 mL/min using a binary linear gradient from 2 to 44 % B in 28 min using eluants A) 5 mM NH<sub>4</sub>OAc pH 8.0 and B) CH<sub>3</sub>CN/A 95/5 (Fig. S17-20).

#### A1 experiment – 4 h:

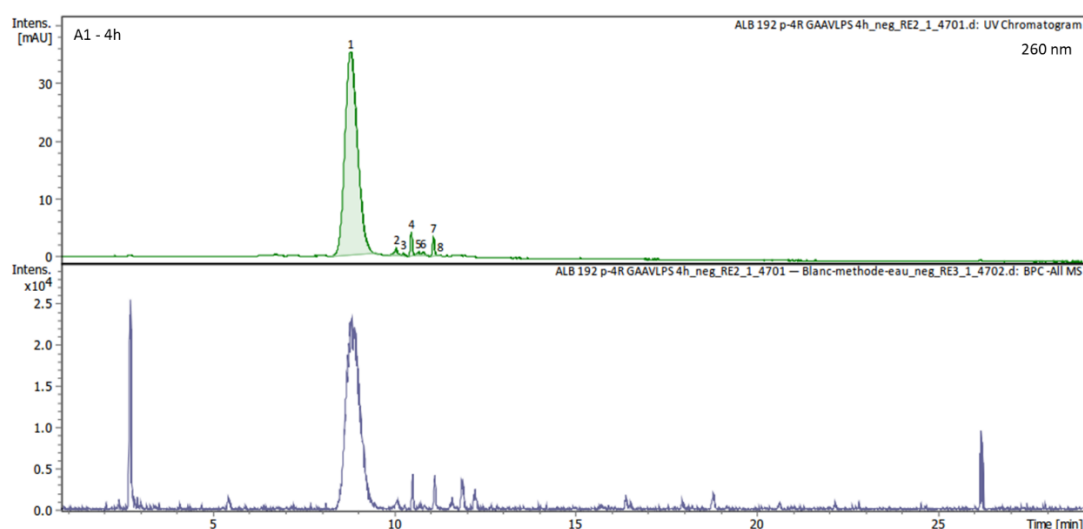

■ Composé 1 - Tr = 8.8 min

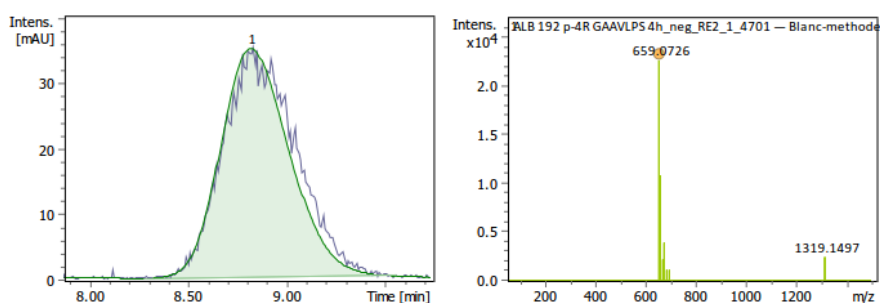

| Meas. m/z | Ion Formula                                                                    | Sum Formula                                                                    | m/z      | err [ppm] | mSigma | Adduct | z  |
|-----------|--------------------------------------------------------------------------------|--------------------------------------------------------------------------------|----------|-----------|--------|--------|----|
| 659.0726  | C <sub>38</sub> H <sub>46</sub> N <sub>14</sub> O <sub>31</sub> P <sub>4</sub> | C <sub>38</sub> H <sub>48</sub> N <sub>14</sub> O <sub>31</sub> P <sub>4</sub> | 659.0707 | -2.8      | 3.9    | M-H    | 2- |

→ Le spectre de masse met en évidence la présence des adduits correspondant à un produit dont la formule brute est la suivante : C<sub>38</sub>H<sub>48</sub>N<sub>14</sub>O<sub>31</sub>P<sub>4</sub>.

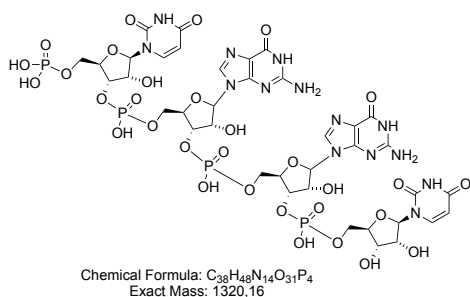

pUGGU

Composé 2 - Tr = 10.1 min

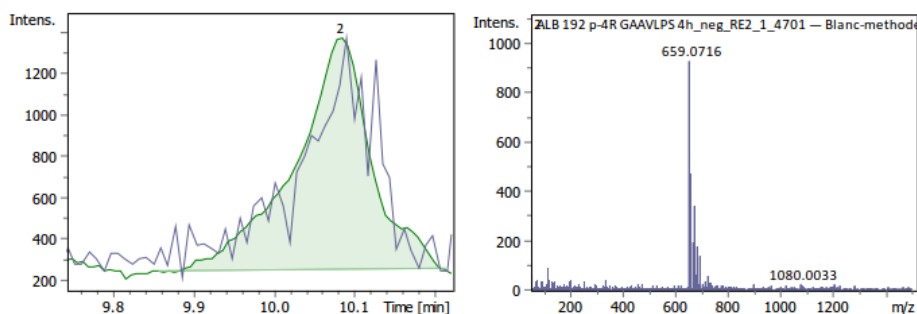

pUGGU

Composé 3 - Tr = 10.3 min

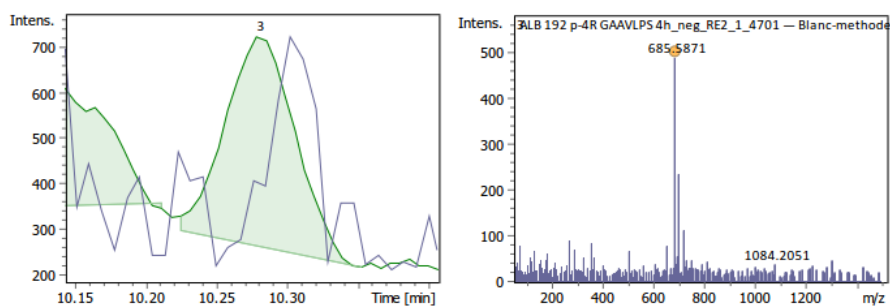

Soit  $M = 685.5871 \times 2 = 1373.1742$  Da

Unidentified derivative

Composé 4 - Tr = 10.5 min

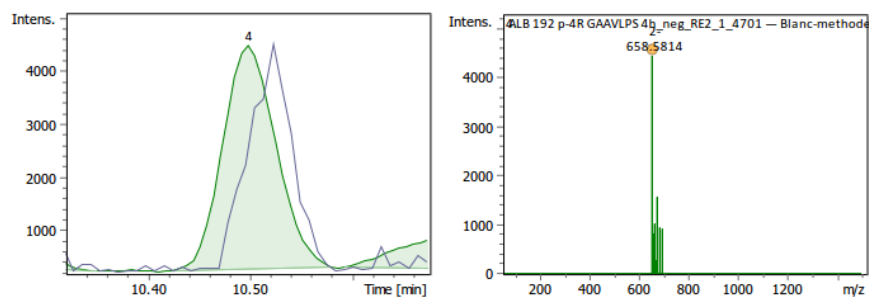

| Meas. m/z | Ion Formula                   | Sum Formula                   | m/z      | err [ppm] | mSigma | Adduct | z  |
|-----------|-------------------------------|-------------------------------|----------|-----------|--------|--------|----|
| 658.5814  | $C_{38}H_{47}N_{15}O_{30}P_4$ | $C_{38}H_{49}N_{15}O_{30}P_4$ | 658.5787 | -4        | 16.6   | M-H    | 2- |

→ Le spectre de masse met en évidence la présence des adduits correspondant à un produit dont la formule brute est la suivante :  $C_{38}H_{49}N_{15}O_{30}P_4$ .

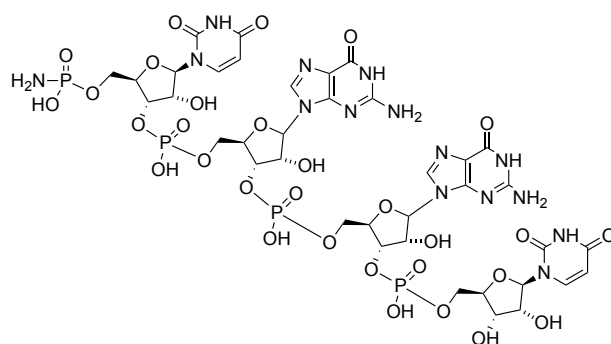

Chemical Formula:  $C_{38}H_{49}N_{15}O_{30}P_4$   
Exact Mass: 1319,17

H<sub>2</sub>N-pUGGU

■ Composé 5 - Tr = 10.7 min

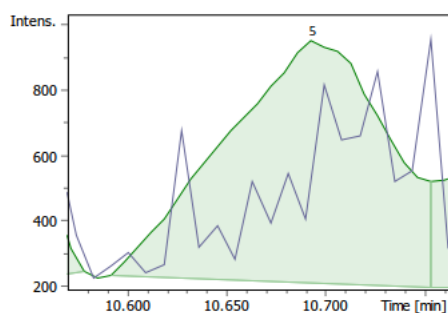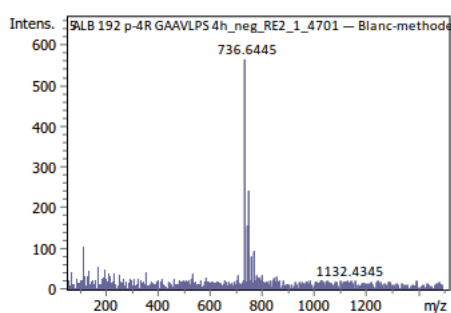

Soit  $M = 736.6445 \times 2 = 1473.2890$  Da

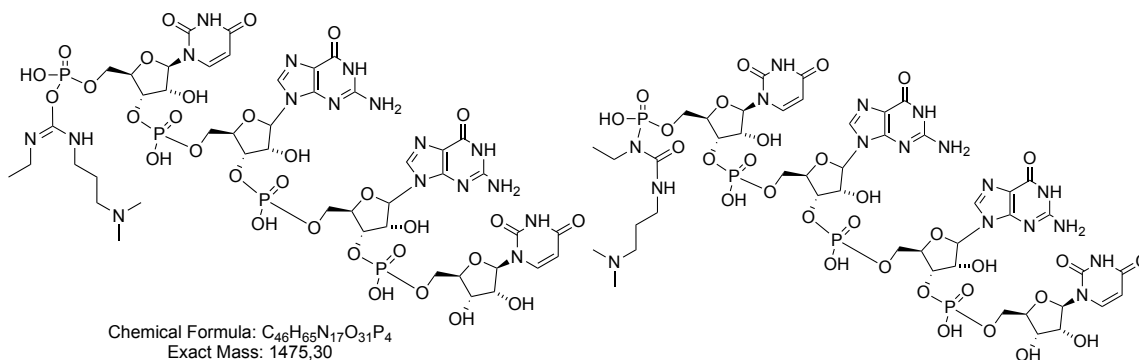

Chemical Formula:  $C_{46}H_{65}N_{17}O_{31}P_4$   
Exact Mass: 1475,30

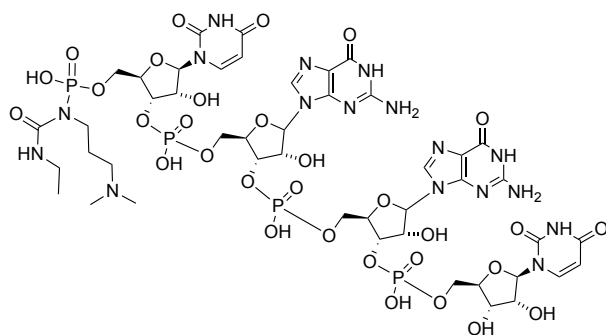

EDC-pUGGU

Composé 6 - Tr = 10.8 min

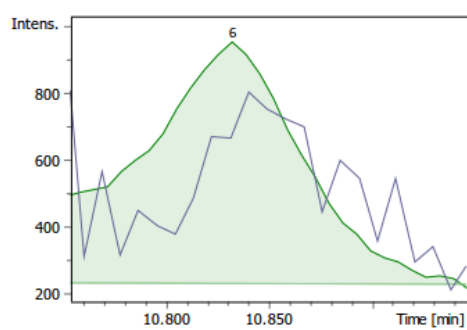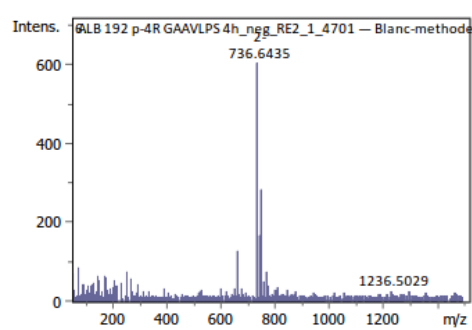

Soit  $M = 736.6435 \times 2 = 1473.2870$  Da

EDC-pUGGU

Composé 7 - Tr = 11.1 min

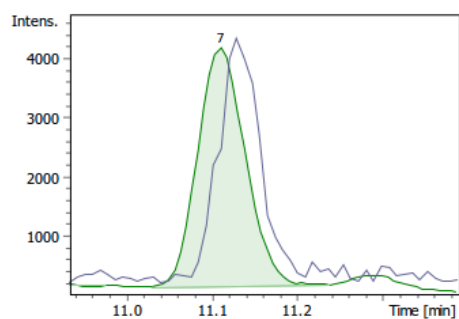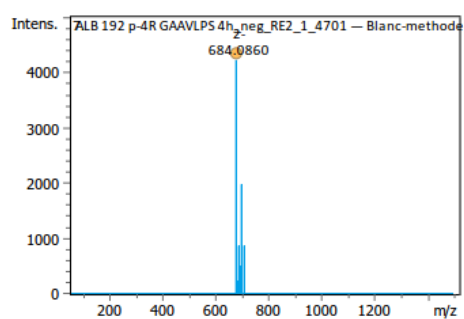

| Meas. m/z | Ion Formula                                                                    | Sum Formula                                                                    | m/z      | err [ppm] | mSigma | Adduct | z  |
|-----------|--------------------------------------------------------------------------------|--------------------------------------------------------------------------------|----------|-----------|--------|--------|----|
| 684.086   | C <sub>41</sub> H <sub>48</sub> N <sub>16</sub> O <sub>30</sub> P <sub>4</sub> | C <sub>41</sub> H <sub>50</sub> N <sub>16</sub> O <sub>30</sub> P <sub>4</sub> | 684.0842 | -2.7      | 16.3   | M-H    | 2- |

→ Le spectre de masse met en évidence la présence des adduits correspondant à un produit dont la formule brute est la suivante : **C<sub>41</sub>H<sub>50</sub>N<sub>16</sub>O<sub>30</sub>P<sub>4</sub>**.

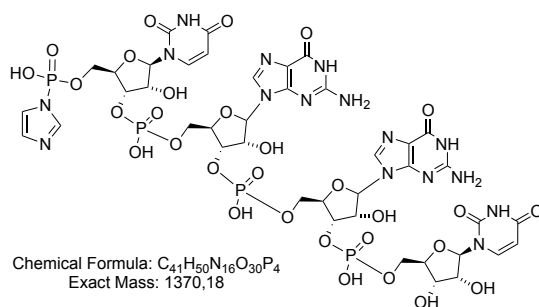

Im-pUGGU

▪ Composé 8 - Tr = 11.3 min

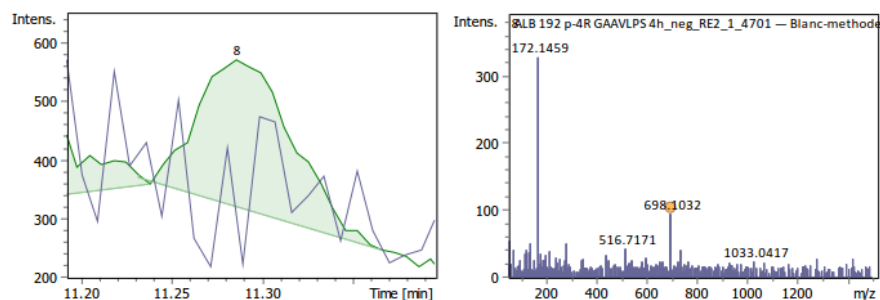

| Meas. m/z | Ion Formula    | Sum Formula    | m/z      | err [ppm] | mSigma | Adduct | z  |
|-----------|----------------|----------------|----------|-----------|--------|--------|----|
| 698.1032  | C43H52N16O30P4 | C43H54N16O30P4 | 698.0998 | -4.8      | 111.8  | M-H    | 2- |

→ Le spectre de masse met en évidence la présence des adduits correspondant à un produit dont la formule brute est la suivante :  $C_{43}H_{54}N_{16}O_{30}P_4$ .

C'est une supposition, l'intensité est vraiment faible, on ne discerne pas de massif isotopique très clair ce qui rend l'identification compliquée.

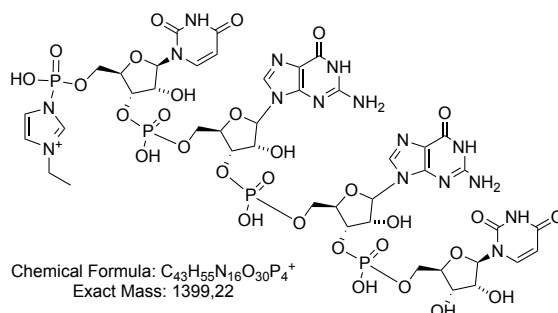

EtIm-pUGGU

Figure S17. UV (260 nm) and LC-MS chromatograms (negative ion mode) with UV peaks and associated compounds obtained for A1 experiment after 4h of reaction with GAVLPSAA mixture.

**A1 experiment – 24 h:**

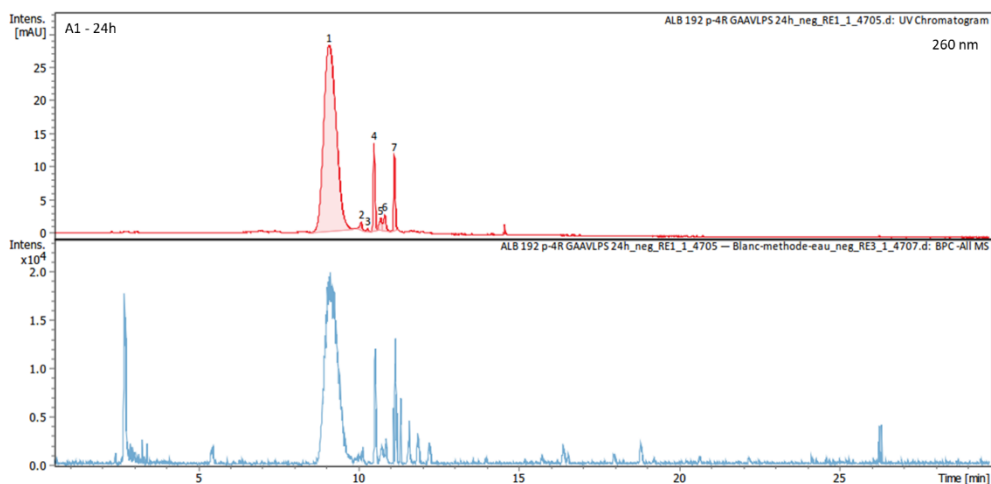

Composé 1 - Tr = 9.1 min

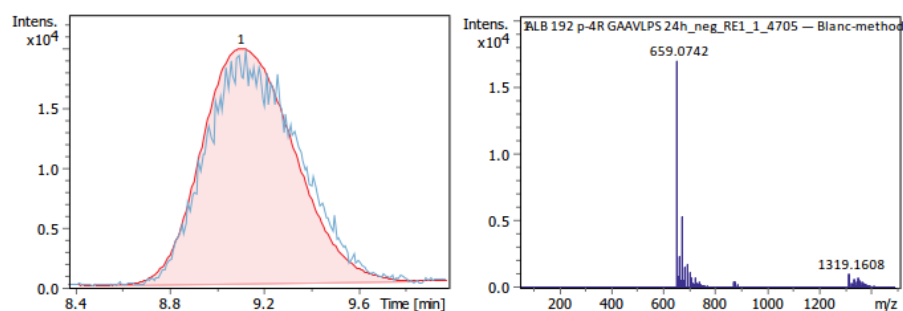

| Meas. m/z | Ion Formula    | Sum Formula    | m/z      | err [ppm] | mSigma | Adduct | z  |
|-----------|----------------|----------------|----------|-----------|--------|--------|----|
| 659.0742  | C38H46N14O31P4 | C38H48N14O31P4 | 659.0707 | -5.2      | 8.9    | M-H    | 2- |

→ Le spectre de masse met en évidence la présence des adduits correspondant à un produit dont la formule brute est la suivante :  $C_{38}H_{48}N_{14}O_{31}P_4$ .

pUGGU

Composé 2 - Tr = 10.1 min

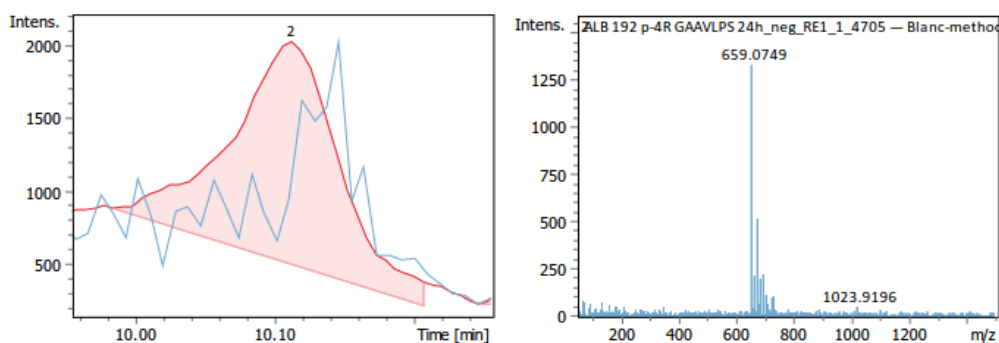

pUGGU

Composé 3 - Tr = 10.3 min

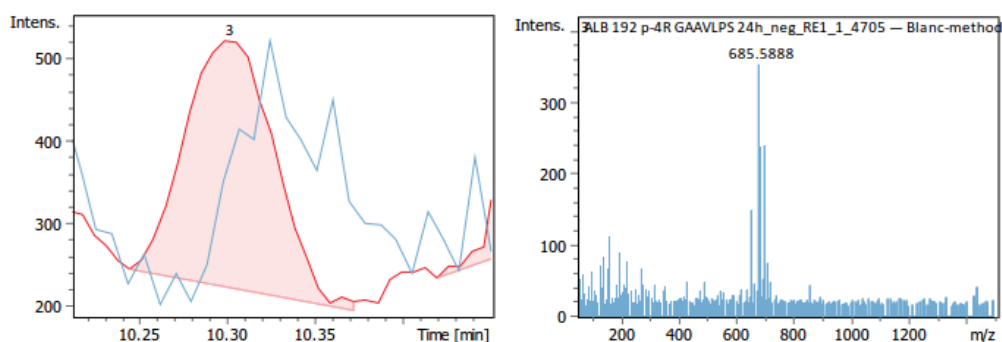

Soit  $M = 685.5888 \times 2 + 2 = 1373.1776$  Da

Unidentified derivative

■ Composé 4 - Tr = 10.5 min

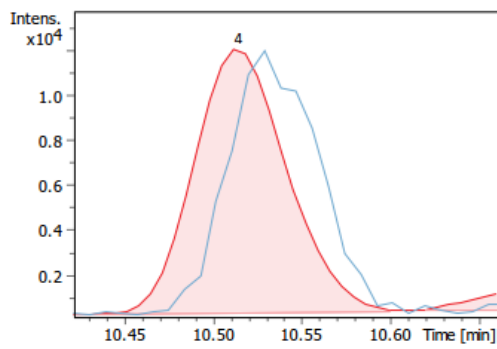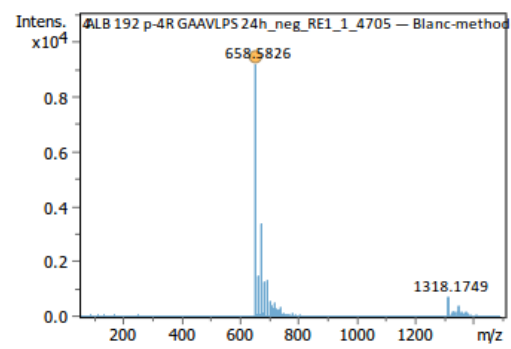

Soit  $M = 658.5836 \times 2 + 2 = 1319.1672$  Da

H<sub>2</sub>N-pUGGU

■ Composé 5 - Tr = 10.7 min

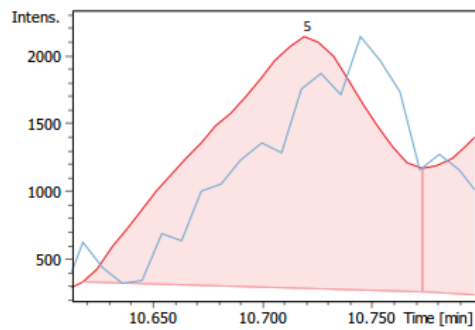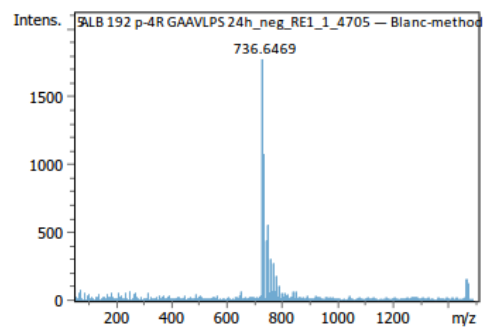

Soit  $M = 736.6459 \times 2 + 2 = 1475.2918$  Da

EDC-pUGGU

■ Composé 6 - Tr = 10.8 min

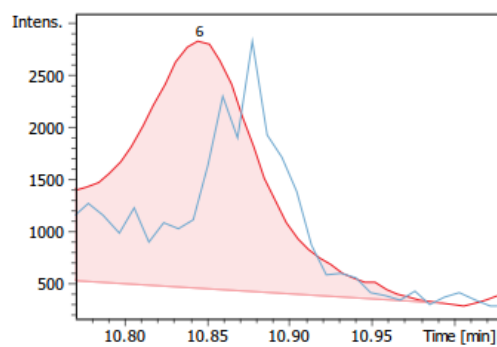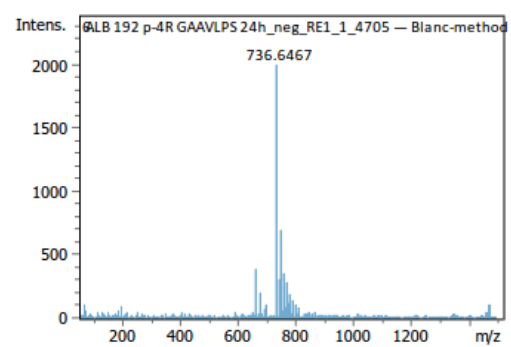

Soit  $M = 736.6467 \times 2 + 2 = 1475.2934$  Da

EDC-pUGGU

▪ Composé 7 - Tr = 11.1 min

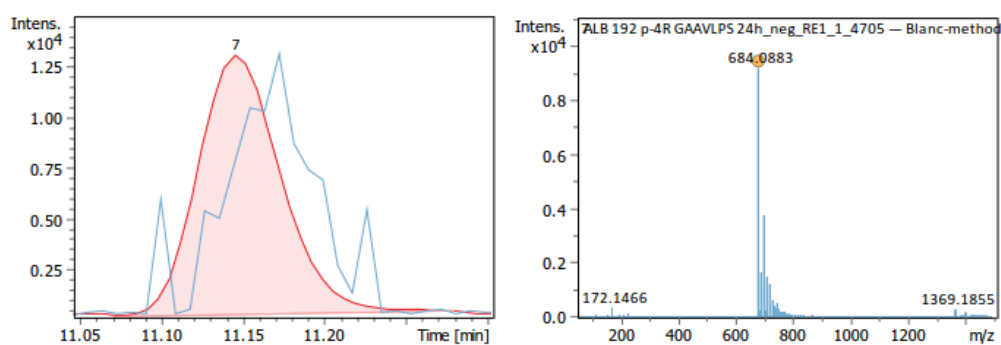

| Meas. m/z | Ion Formula    | Sum Formula    | m/z      | err [ppm] | mSigma | Adduct | z  |
|-----------|----------------|----------------|----------|-----------|--------|--------|----|
| 684.0883  | C41H48N16O30P4 | C41H50N16O30P4 | 684.0842 | -6.1      | 6.6    | M-H    | 2- |

→ Le spectre de masse met en évidence la présence des adduits correspondant à un produit dont la formule brute est la suivante : **C<sub>41</sub>H<sub>50</sub>N<sub>16</sub>O<sub>30</sub>P<sub>4</sub>**.

Im-pUGGU

Figure S18. UV (260 nm) and LC-MS chromatograms (negative ion mode) with UV peaks and associated compounds obtained for A1 experiment after 24 h of reaction with GAVLPSAA mixture.



## A1 experiment – 120 h:

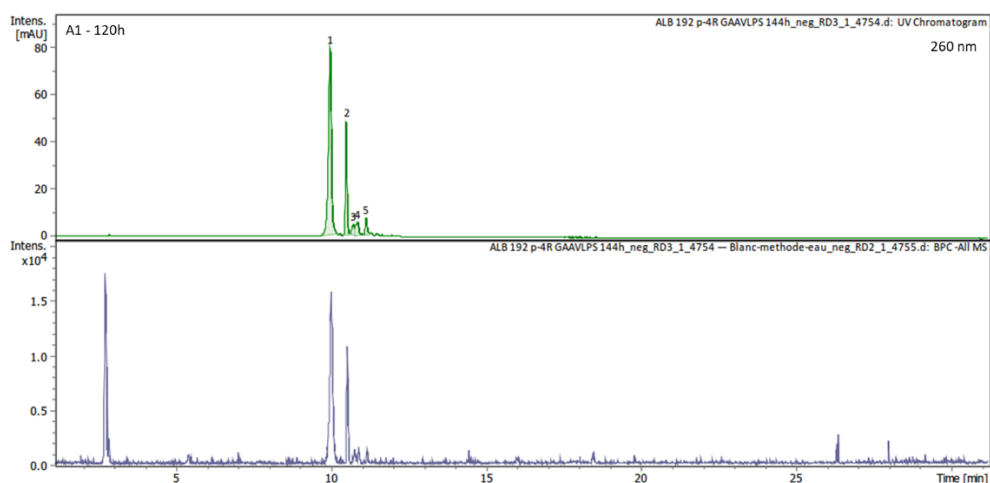

### Composé 1 - Tr = 10.0 min

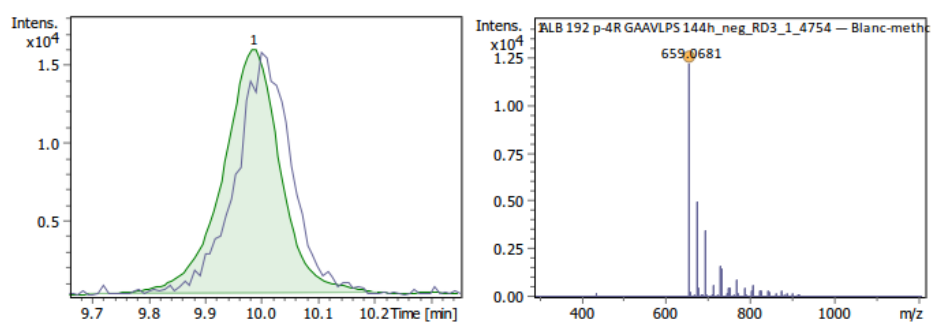

| Meas. m/z | Ion Formula                                                                    | Sum Formula                                                                    | m/z      | err [ppm] | mSigma | Adduct | z  |
|-----------|--------------------------------------------------------------------------------|--------------------------------------------------------------------------------|----------|-----------|--------|--------|----|
| 659.0681  | C <sub>38</sub> H <sub>46</sub> N <sub>14</sub> O <sub>31</sub> P <sub>4</sub> | C <sub>38</sub> H <sub>48</sub> N <sub>14</sub> O <sub>31</sub> P <sub>4</sub> | 659.0707 | 4         | 14.6   | M-H    | 2- |

→ Le spectre de masse met en évidence la présence des adduits correspondant à un produit dont la formule brute est la suivante : **C<sub>38</sub>H<sub>48</sub>N<sub>14</sub>O<sub>31</sub>P<sub>4</sub>**.

## pUGGU

### Composé 2 - Tr = 10.5 min

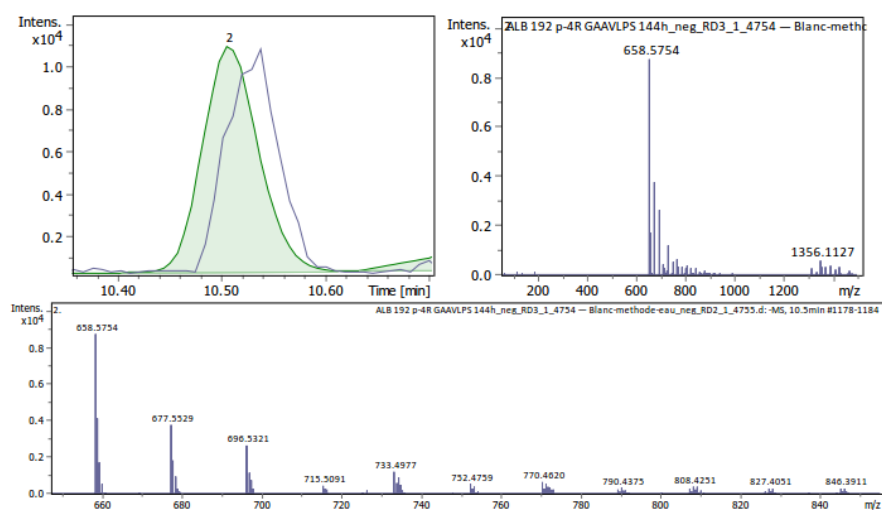

Soit  $M = 658.5754 \times 2 + 2 = 1319.1508$  Da

## H<sub>2</sub>N-pUGGU

▪ Composé 3 - Tr = 10.7 min

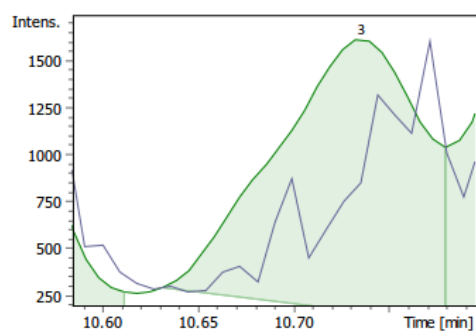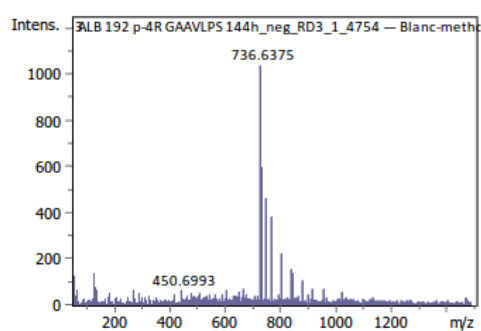

$$\text{Soit } M = 736.6375 \times 2 + 2 = 1475.275 \text{ Da}$$

EDC-pUGGU

▪ Composé 4 - Tr = 10.9 min

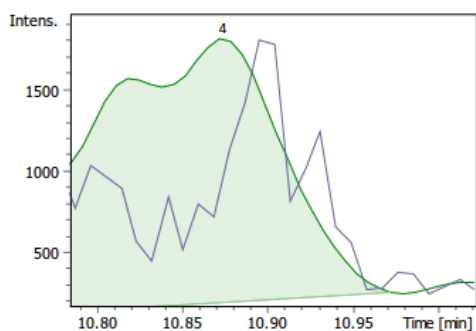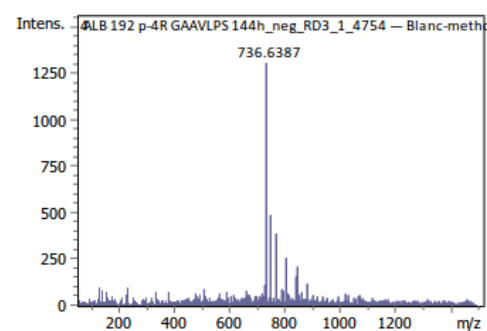

$$\text{Soit } M = 736.6387 \times 2 + 2 = 1475.2774 \text{ Da}$$

EDC-pUGGU

▪ Composé 5 - Tr = 11.1 min

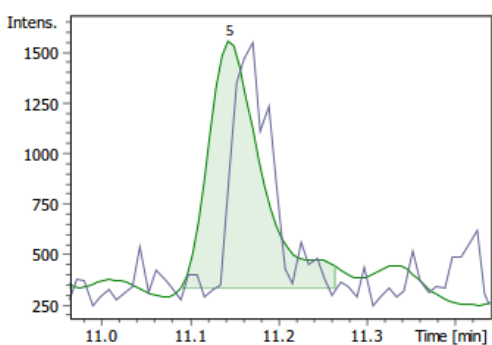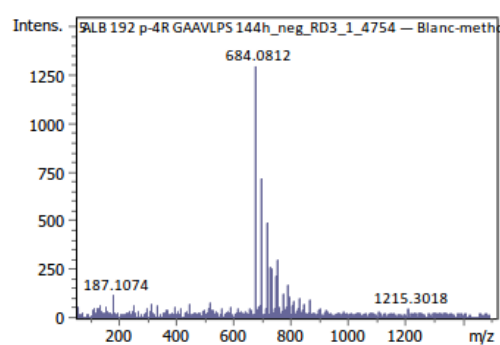

$$\text{Soit } M = 684.0812 \times 2 + 2 = 1370.1624 \text{ Da}$$

Im-pUGGU

Figure S19. UV (260 nm) and LC-MS chromatograms (negative ion mode) with UV peaks and associated compounds obtained for A1 experiment after 124 h of reaction with GAVLPSAA mixture.

## A2 experiment – 360 h:

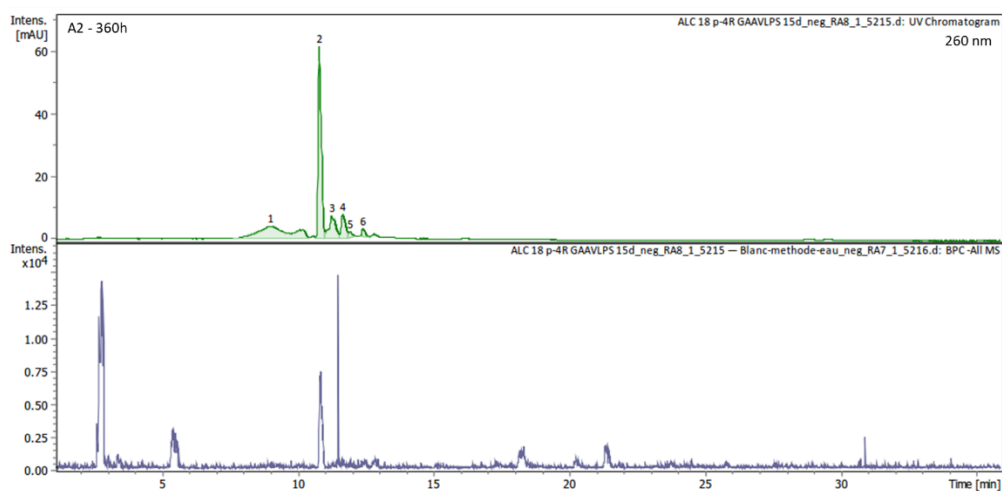

### Composé 1 - Tr = 9.0 min

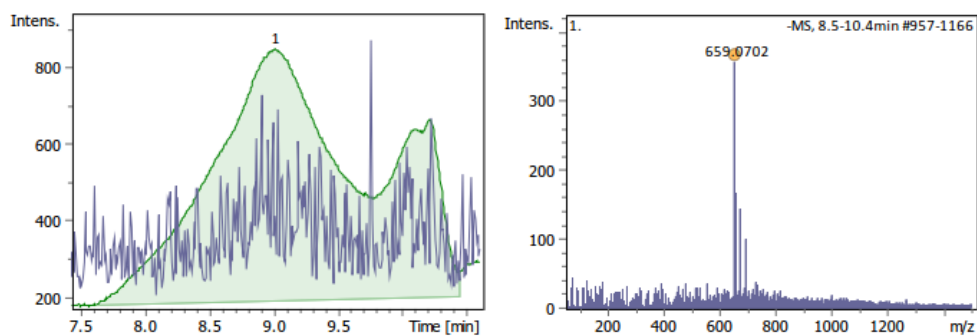

| Meas. m/z | Ion Formula                                                                    | Sum Formula                                                                    | m/z      | err [ppm] | mSigma | Adduct | z  |
|-----------|--------------------------------------------------------------------------------|--------------------------------------------------------------------------------|----------|-----------|--------|--------|----|
| 659.0702  | C <sub>38</sub> H <sub>46</sub> N <sub>14</sub> O <sub>31</sub> P <sub>4</sub> | C <sub>38</sub> H <sub>48</sub> N <sub>14</sub> O <sub>31</sub> P <sub>4</sub> | 659.0707 | 0.8       | 32.1   | M-H    | 2- |

→ Le spectre de masse met en évidence la présence des adduits correspondant à un produit dont la formule brute est la suivante : **C<sub>38</sub>H<sub>48</sub>N<sub>14</sub>O<sub>31</sub>P<sub>4</sub>**.

## pUGGU

### Composé 2 - Tr = 10.8 min

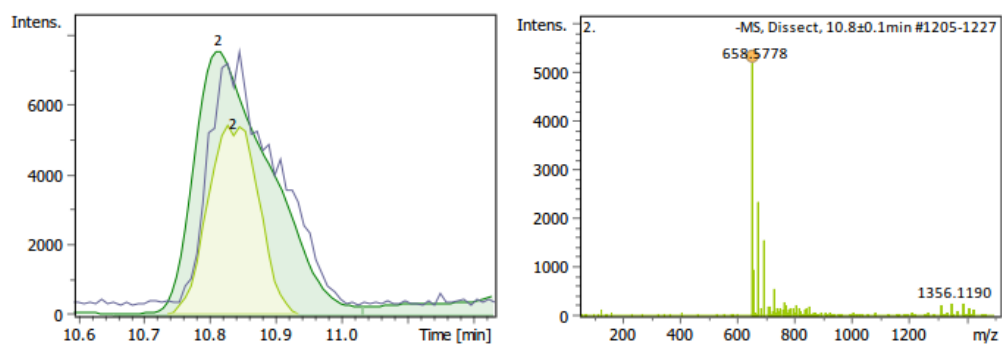

| Meas. m/z | Ion Formula                                                                    | Sum Formula                                                                    | m/z      | err [ppm] | mSigma | Adduct | z  |
|-----------|--------------------------------------------------------------------------------|--------------------------------------------------------------------------------|----------|-----------|--------|--------|----|
| 658.5778  | C <sub>38</sub> H <sub>47</sub> N <sub>15</sub> O <sub>30</sub> P <sub>4</sub> | C <sub>38</sub> H <sub>49</sub> N <sub>15</sub> O <sub>30</sub> P <sub>4</sub> | 658.5787 | 1.5       | 15     | M-H    | 2- |

→ Le spectre de masse met en évidence la présence des adduits correspondant à un produit dont la formule brute est la suivante : **C<sub>38</sub>H<sub>49</sub>N<sub>15</sub>O<sub>30</sub>P<sub>4</sub>**.

## H<sub>2</sub>N-pUGGU

▪ Composé 3 - Tr = 11.3 min

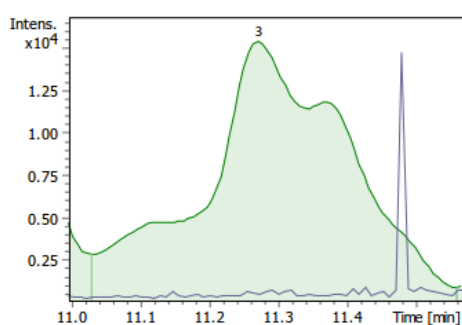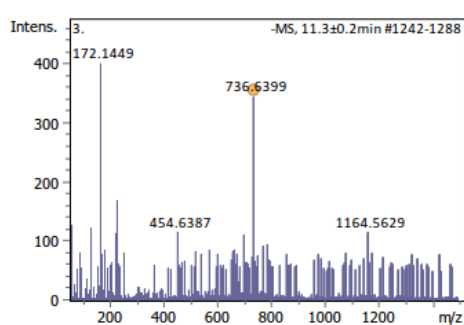

| Meas. m/z | Ion Formula                                                                    | Sum Formula                                                                    | m/z      | err [ppm] | mSigma | Adduct | z  |
|-----------|--------------------------------------------------------------------------------|--------------------------------------------------------------------------------|----------|-----------|--------|--------|----|
| 736.6399  | C <sub>46</sub> H <sub>63</sub> N <sub>17</sub> O <sub>31</sub> P <sub>4</sub> | C <sub>46</sub> H <sub>65</sub> N <sub>17</sub> O <sub>31</sub> P <sub>4</sub> | 736.6419 | 2.6       | 140.1  | M-H    | 2- |

→ Le spectre de masse met en évidence la présence des adduits correspondant à un produit dont la formule brute est la suivante : **C<sub>46</sub>H<sub>65</sub>N<sub>17</sub>O<sub>31</sub>P<sub>4</sub>**.

### EDC-pUGGU

▪ Composé 4 - Tr = 11.7 min

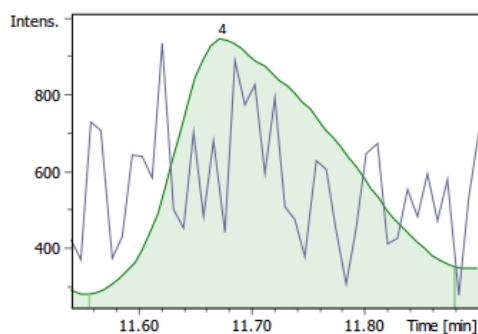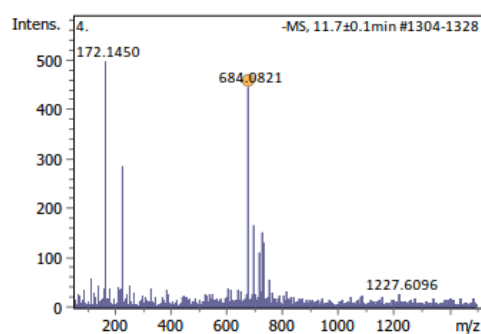

| Meas. m/z | Ion Formula                                                                    | Sum Formula                                                                    | m/z      | err [ppm] | mSigma | Adduct | z  |
|-----------|--------------------------------------------------------------------------------|--------------------------------------------------------------------------------|----------|-----------|--------|--------|----|
| 684.0821  | C <sub>41</sub> H <sub>48</sub> N <sub>16</sub> O <sub>30</sub> P <sub>4</sub> | C <sub>41</sub> H <sub>50</sub> N <sub>16</sub> O <sub>30</sub> P <sub>4</sub> | 684.0842 | 3         | 177.7  | M-H    | 2- |

→ Le spectre de masse met en évidence la présence des adduits correspondant à un produit dont la formule brute est la suivante : **C<sub>41</sub>H<sub>50</sub>N<sub>16</sub>O<sub>30</sub>P<sub>4</sub>**.

### Im-pUGGU

▪ Composé 5 - Tr = 12.0 min

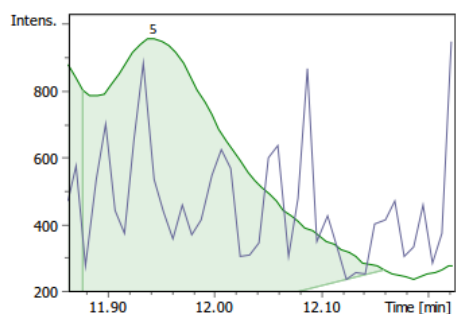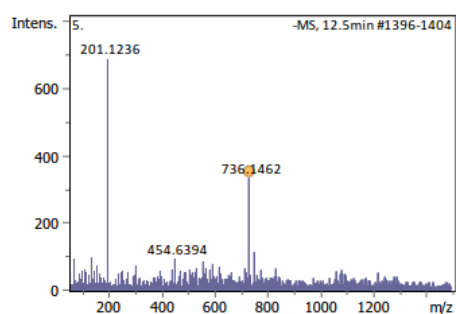

| Meas. m/z | Ion Formula                                                                    | Sum Formula                                                                    | m/z      | err [ppm] | mSigma | Adduct | z  |
|-----------|--------------------------------------------------------------------------------|--------------------------------------------------------------------------------|----------|-----------|--------|--------|----|
| 736.1462  | C <sub>46</sub> H <sub>64</sub> N <sub>18</sub> O <sub>30</sub> P <sub>4</sub> | C <sub>46</sub> H <sub>66</sub> N <sub>18</sub> O <sub>30</sub> P <sub>4</sub> | 736.1499 | 5         | 67.7   | M-H    | 2- |

→ Le spectre de masse met en évidence la présence des adduits correspondant à un produit dont la formule brute est la suivante : **C<sub>46</sub>H<sub>66</sub>N<sub>18</sub>O<sub>30</sub>P<sub>4</sub>**.

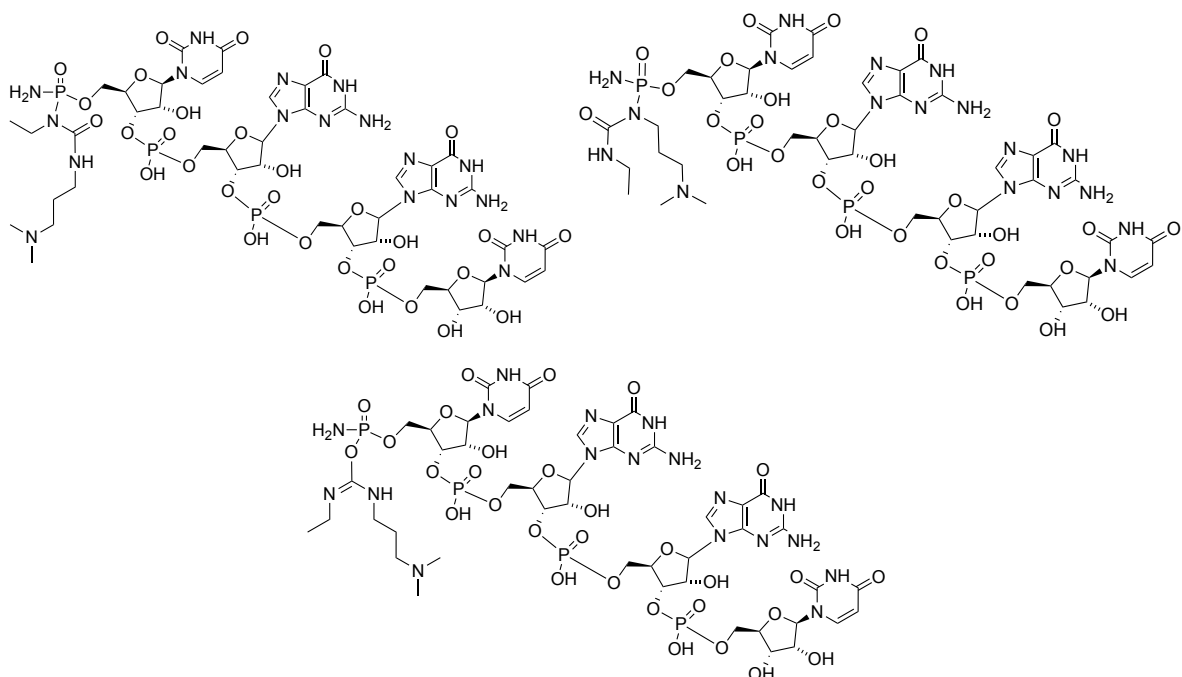

### EDC-H<sub>2</sub>N-pUGGU

- Composé 6 - Tr = 12.5 min

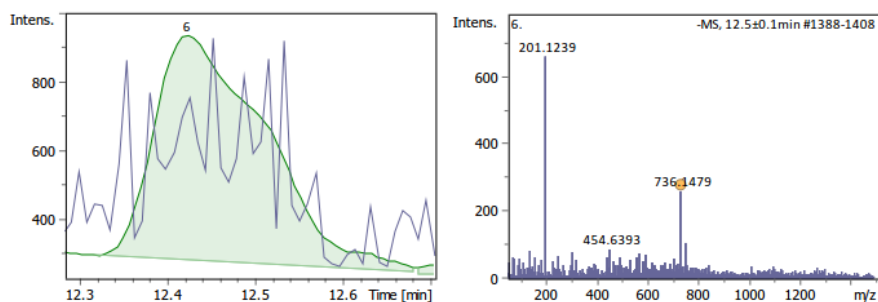

| Meas. m/z | Ion Formula                                                                    | Sum Formula                                                                    | m/z      | err [ppm] | mSigma | Adduct | z  |
|-----------|--------------------------------------------------------------------------------|--------------------------------------------------------------------------------|----------|-----------|--------|--------|----|
| 736.1479  | C <sub>46</sub> H <sub>64</sub> N <sub>18</sub> O <sub>30</sub> P <sub>4</sub> | C <sub>46</sub> H <sub>66</sub> N <sub>18</sub> O <sub>30</sub> P <sub>4</sub> | 736.1499 | 2.6       | 72.2   | M-H    | 2- |

→ Le spectre de masse met en évidence la présence des adduits correspondant à un produit dont la formule brute est la suivante : **C<sub>46</sub>H<sub>66</sub>N<sub>18</sub>O<sub>30</sub>P<sub>4</sub>**.

### EDC-H<sub>2</sub>N-pUGGU

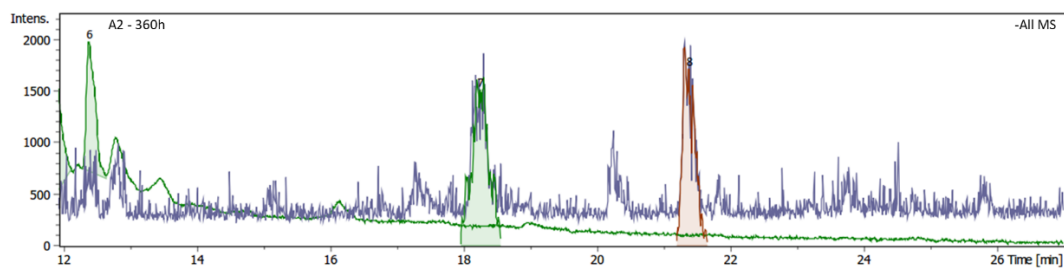

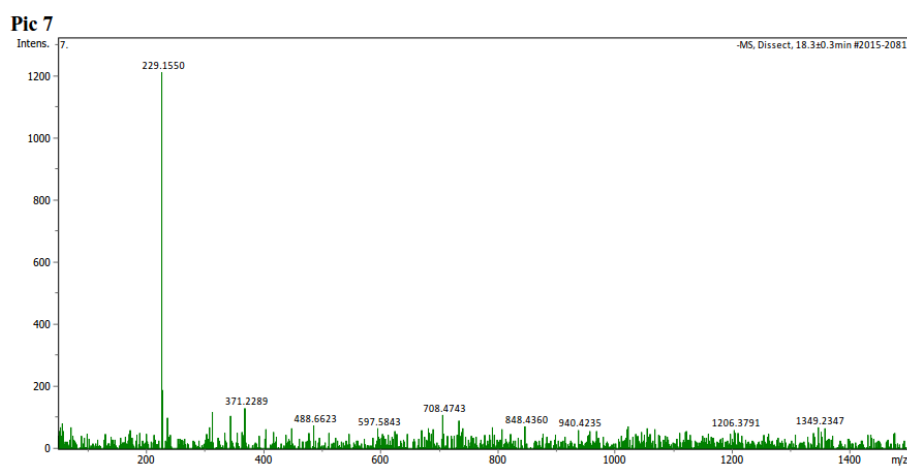

Azidoalaninyl-valine or valinyl-azidoalanine

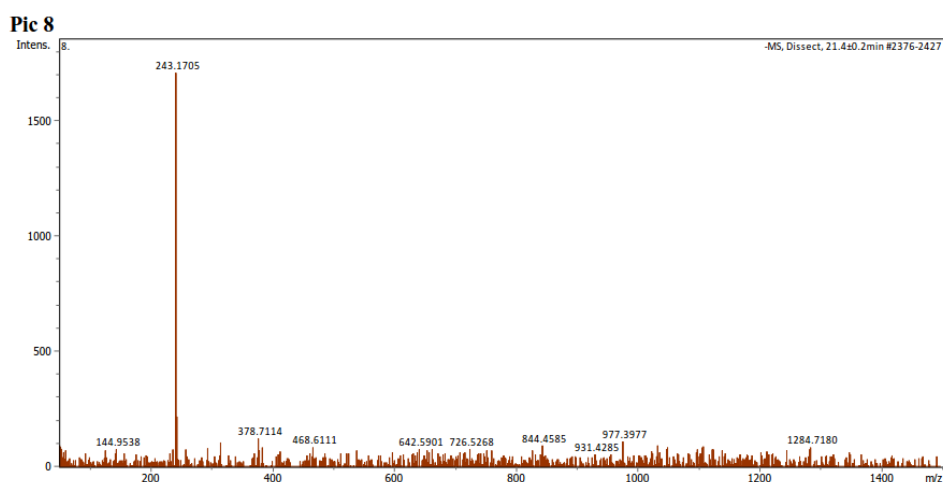

Azidoalaninyl-leucine or leucanyl-azidoalanine

Figure S20. UV (260 nm) and LC-MS chromatograms (negative ion mode) with UV peaks and associated compounds obtained for A2 experiment after 360 h of reaction with GAVLPSAA mixture.

In order to see if our conditions were compatible with the presence of prebiotic lipidic vesicles, their formation was tested by gentle hydration from dried lipid films. For that, 0.5 mL of a methanolic concentrated mixture of lipids containing 10 mM LA:MLG:DLPA (1:1:1) (6.66 mg of LA, 10.9 mg of MLG and 17.1 mg of DLPA in 10 mL of methanol) was diluted in a flask with 0.5 mL of MeOH (5 mM final concentration + 0.02 mol% of DOPE-Rhodamine). The solvent was evaporated using a rotavapor and a bath at 40°C to form a thin lipidic film. After dehydration overnight, the film was rehydrated overnight at room temperature with 1 mL of a buffer solution containing 1 or 2 mM EDC (A1 or A2 experiment) and 375  $\mu$ M Et-Im at pH 6.5 (adjusted with 100 mM HCl) prepared as previously for the coupling experiments. After hydration over 16 h at room temperature, the vesicles were observed using epifluorescence microscopy. Then, 1 or 3 mM of GAVLPSAA mixture (A1 or A2 experiment) were added from a concentrated solution of 50 mM prepared as described previously. These concentrations were only estimation, as detailed thereover. For the A2 experiment, 1 mM EDC was also added at that point from a concentrated solution of 10 mM prepared as described previously. In both cases, the samples were adjusted to pH 8.0 adding 100 mM NaOH. After incubation over 16 h at room temperature, the vesicles were observed using epifluorescence microscopy.

### 3)3) Coupling attempts and vesicles production in the presence of EDC and DMAP

These experiments were performed very similarly to the previous ones:

**Activation step:** The previously synthesized RNA pUGGU (50  $\mu$ M, 1 eq, concentration calculated with the UV absorbance at 260 nm and the online service OligoCalc™) was added to 20 equivalents of DMAP (1 mM, 1.22 mg in 1 mL of ultrapure water for a concentrated solution of 10 mM later diluted 10 times to reach the desired concentration) in ultrapure water. Then, the pH was adjusted to 8.0 adding 100 mM HCl. Afterwards, 20 equivalents of EDC (1 mM, B1 experiment) or 40 equivalents of EDC (2 mM, B2 experiment) were added from a concentrated solution (10 mM, 1.55 mg in 1 mL). Eventually, the pH was adjusted to 8.0 adding 100 mM NaOH. The activation reaction was left for 2 h (B1 experiment) or 192 h (B2 experiment).

**Incubation step:** After activation, 20 “equivalents” (1 mM, B1 experiment) or 40 “equivalents” (2 mM, B2 experiment) of the GAVLPSAA mixture were added from a concentrated solution (50 mM, 9.70 mg of lyophilized GAVLPSAA mixtures in 1 mL of ultrapure water) to the activated oligonucleotides. Importantly, the concentration of peptides added referred to an estimation. The amount of peptides in solution after polymerization with CDI could be estimated when taking into account the amount of salts, imidazole, non-polymerized amino acids (obtained with the oligomerization extent of all amino acids previously determined (Fig. 2F)) and the average molecular mass of the peptides ( $\approx$  600 Da, Fig. 3). The pH was then adjusted to 8.0 adding 100 mM HCl. The reactions were then left in an Eppendorf vial for 120 h (B1 experiment) or 312 h (B2 experiment) at ambient temperature and without shaking. The pH was checked regularly and remained stable around the pH set after the addition of GAVLPSAA mixtures. 50  $\mu$ L of the solutions were sampled during the reaction or at least the end of the incubation for LC-MS analysis.

After the incubation and 120 h additional hours, the sample of the B1.1 experiment was concentrated twice by heating at 60°C under argon flow. 50  $\mu$ L of this sample were taken for LC-MS analysis. A second evaporation was performed similarly after 5 h and 50  $\mu$ L were sampled for LC-MS analysis.

All the products of reaction were analysed using LC-MS with a *Gemini*™ C18 column (250  $\times$  4.6 mm, 5  $\mu$ m, *Phenomenex*®). The oligonucleotides were separated at 1.0 mL/min using a binary linear gradient from 2 to 44 % B in 28 min using eluants A) 5 mM NH<sub>4</sub>OAc pH 8.0 and B) CH<sub>3</sub>CN/A 95:5 (Figs. S21-S26).

#### B1 experiment – 0 h:

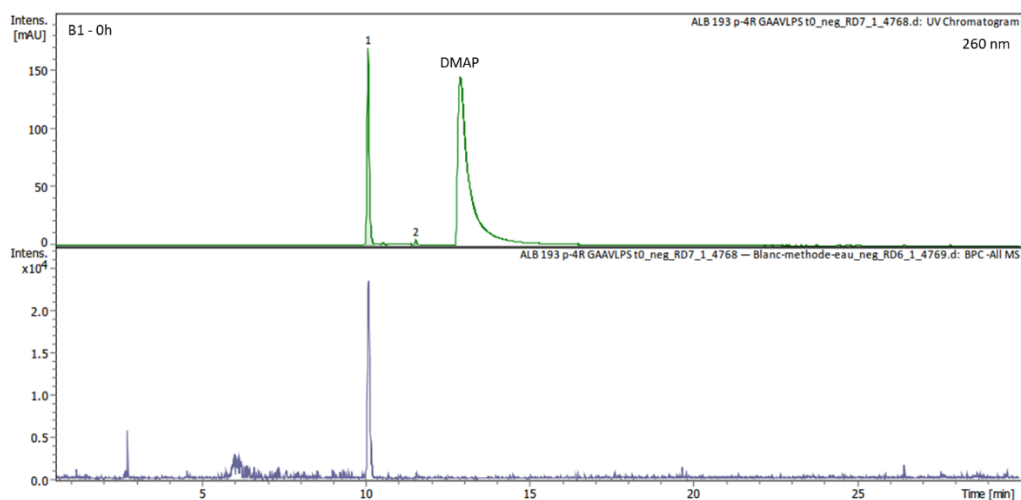

▪ Composé 1 - Tr = 10.1 min

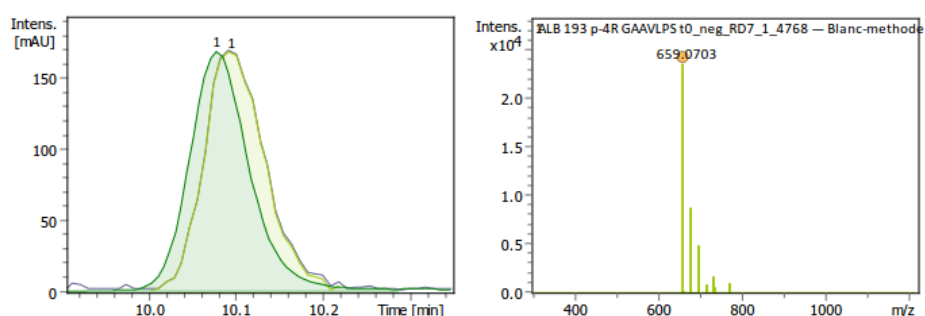

| Meas. m/z | Ion Formula    | Sum Formula    | m/z      | err [ppm] | mSigma | Adduct | z  |
|-----------|----------------|----------------|----------|-----------|--------|--------|----|
| 659.0703  | C38H46N14O31P4 | C38H48N14O31P4 | 659.0707 | 0.6       | 12.8   | M-H    | 2- |

→ Le spectre de masse met en évidence la présence des adduits correspondant à un produit dont la formule brute est la suivante :  $C_{38}H_{48}N_{14}O_{31}P_4$ .

pUGGU

▪ Composé 2 - Tr = 11.6 min

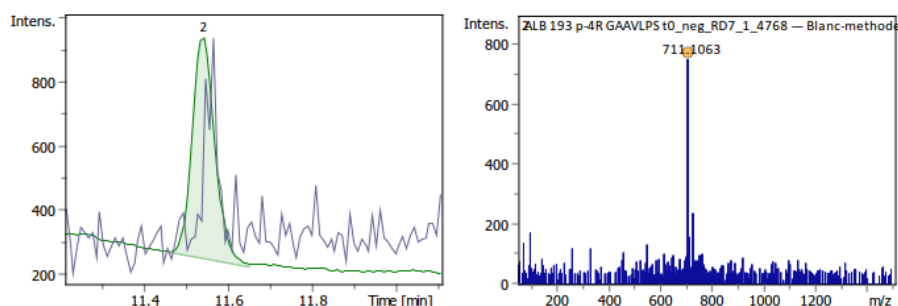

| Meas. m/z | Ion Formula    | Sum Formula    | m/z      | err [ppm] | mSigma | Adduct | z  |
|-----------|----------------|----------------|----------|-----------|--------|--------|----|
| 711.1063  | C45H54N16O30P4 | C45H56N16O30P4 | 711.1077 | 2         | 156.9  | M-H    | 2- |

→ Le spectre de masse met en évidence la présence des adduits correspondant à un produit dont la formule brute est la suivante :  $C_{45}H_{56}N_{16}O_{30}P_4$ .

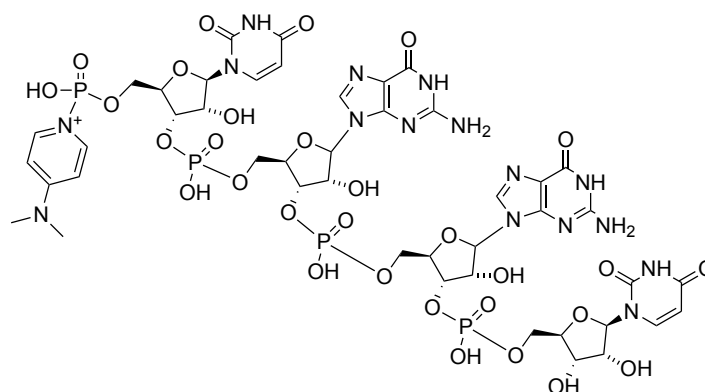

Chemical Formula:  $C_{45}H_{57}N_{16}O_{30}P_4^+$   
Exact Mass: 1425,24

DMAP-pUGGU

Figure S21. UV (260 nm) and LC-MS chromatograms (negative ion mode), UV peaks and associated compounds obtained for B1 experiment before the reaction with GAVLPSAA (0 h).



B1.1 experiment – 120 h:

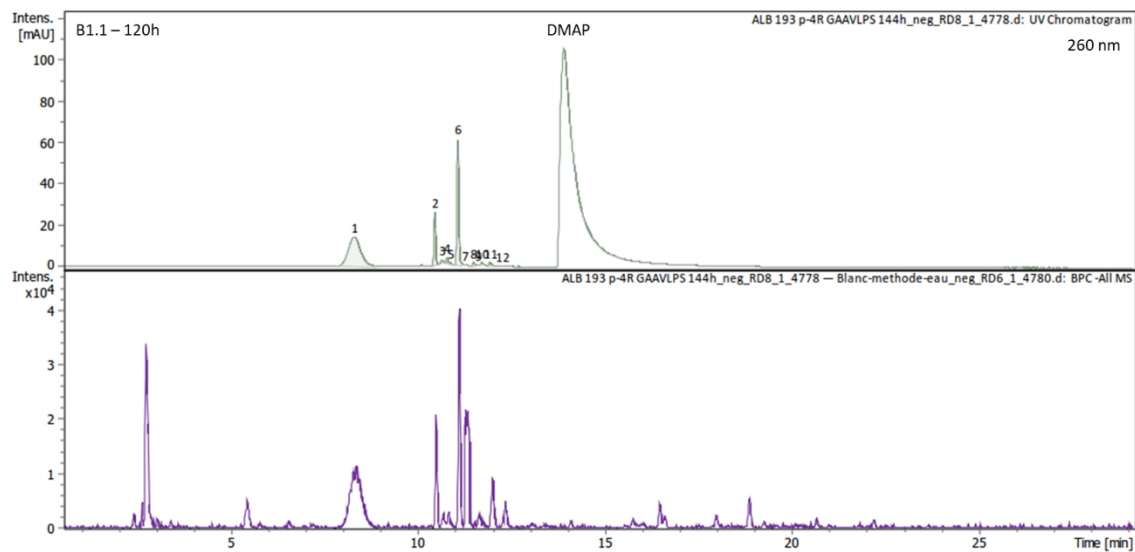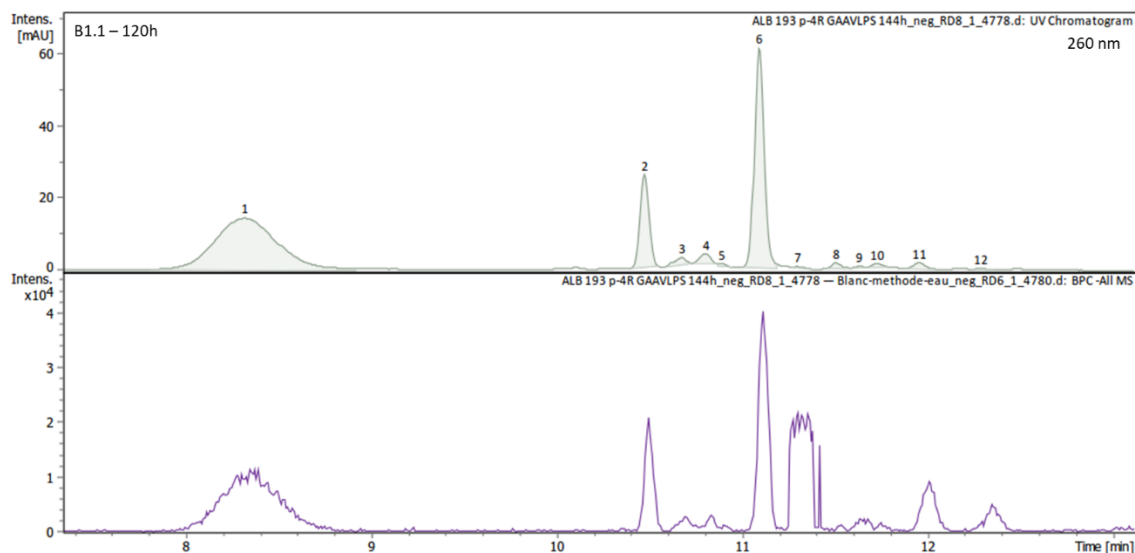

Composé 1 - Tr = 8.3 min

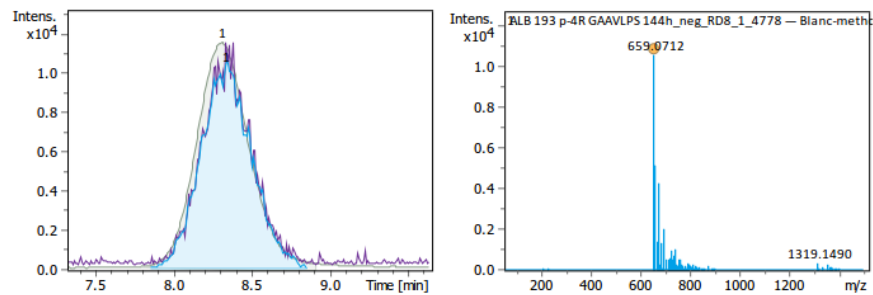

| Meas. m/z | Ion Formula    | Sum Formula    | m/z      | err [ppm] | mSigma | Adduct | z  |
|-----------|----------------|----------------|----------|-----------|--------|--------|----|
| 659.0712  | C38H46N14O31P4 | C38H48N14O31P4 | 659.0707 | -0.6      | 4.7    | M-H    | 2- |

→ Le spectre de masse met en évidence la présence des adduits correspondant à un produit dont la formule brute est la suivante : C<sub>38</sub>H<sub>48</sub>N<sub>14</sub>O<sub>31</sub>P<sub>4</sub>

pUGGU

▪ Composé 2 - Tr = 10.5 min

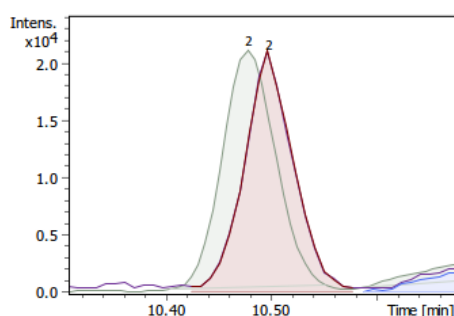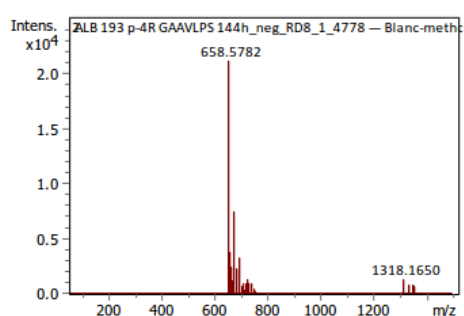

| Meas. m/z | Ion Formula    | Sum Formula    | m/z      | err [ppm] | mSigma | Adduct | z  |
|-----------|----------------|----------------|----------|-----------|--------|--------|----|
| 658.5782  | C38H47N15O30P4 | C38H49N15O30P4 | 658.5787 | 0.8       | 4.8    | M-H    | 2- |

→ Le spectre de masse met en évidence la présence des adduits correspondant à un produit dont la formule brute est la suivante :  $C_{38}H_{49}N_{15}O_{30}P_4$

### H<sub>2</sub>N-pUGGU

▪ Composé 3 - Tr = 10.7 min

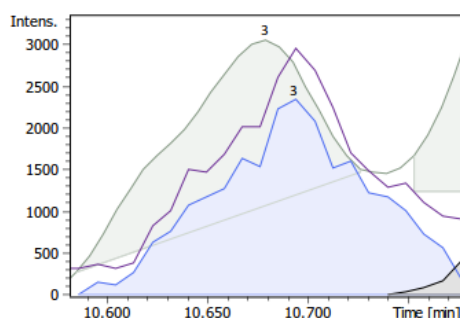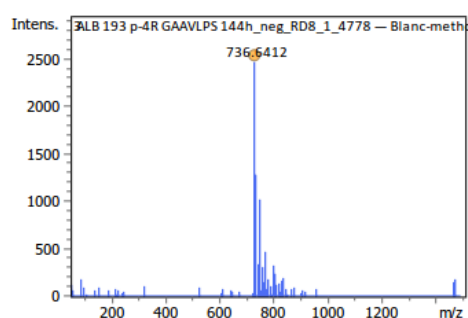

| Meas. m/z | Ion Formula    | Sum Formula    | m/z      | err [ppm] | mSigma | Adduct | z  |
|-----------|----------------|----------------|----------|-----------|--------|--------|----|
| 736.6412  | C46H63N17O31P4 | C46H65N17O31P4 | 736.6419 | 0.9       | 33.8   | M-H    | 2- |

→ Le spectre de masse met en évidence la présence des adduits correspondant à un produit dont la formule brute est la suivante :  $C_{46}H_{65}N_{17}O_{31}P_4$

### EDC-pUGGU

▪ Composé 4 - Tr = 10.8 min

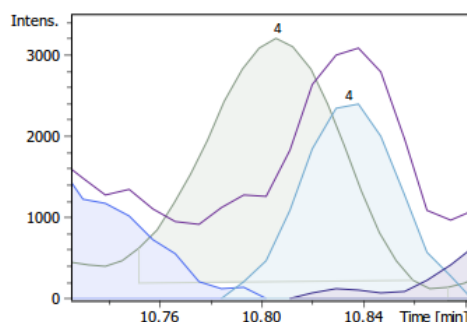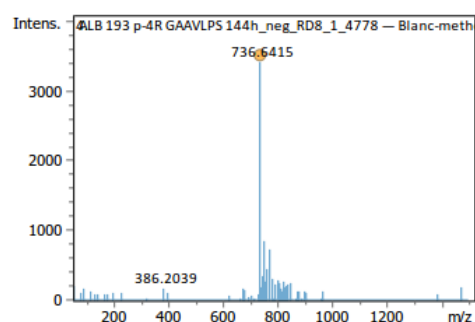

| Meas. m/z | Ion Formula    | Sum Formula    | m/z      | err [ppm] | mSigma | Adduct | z  |
|-----------|----------------|----------------|----------|-----------|--------|--------|----|
| 736.6415  | C46H63N17O31P4 | C46H65N17O31P4 | 736.6419 | 0.5       | 28.3   | M-H    | 2- |

→ Le spectre de masse met en évidence la présence des adduits correspondant à un produit dont la formule brute est la suivante :  $C_{46}H_{65}N_{17}O_{31}P_4$

### EDC-pUGGU

▪ Composé 5 - Tr = 10.9 min

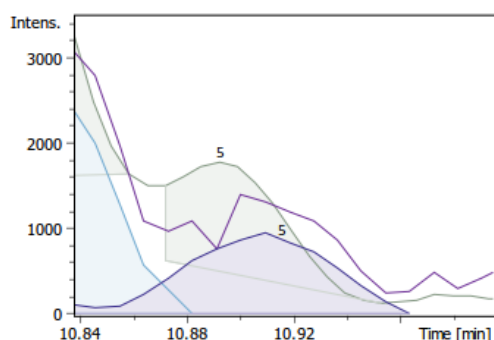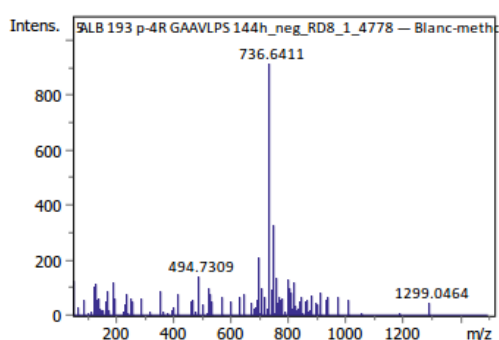

| Meas. m/z | Ion Formula    | Sum Formula    | m/z      | err [ppm] | mSigma | Adduct | z  |
|-----------|----------------|----------------|----------|-----------|--------|--------|----|
| 736.6411  | C46H63N17O31P4 | C46H65N17O31P4 | 736.6419 | 1         | 51.9   | M-H    | 2- |

→ Le spectre de masse met en évidence la présence des adduits correspondant à un produit dont la formule brute est la suivante : **C<sub>46</sub>H<sub>65</sub>N<sub>17</sub>O<sub>31</sub>P<sub>4</sub>**

EDC-pUGGU

▪ Composé 6 - Tr = 11.1 min

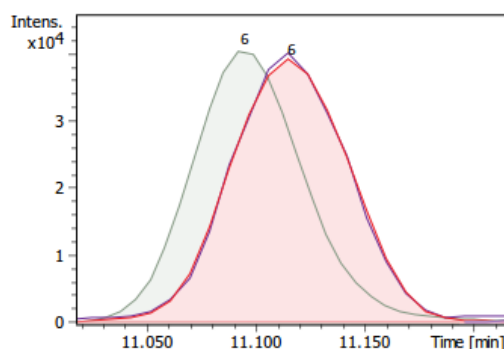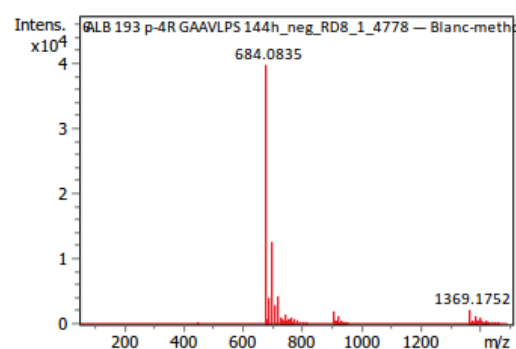

| Meas. m/z | Ion Formula    | Sum Formula    | m/z      | err [ppm] | mSigma | Adduct | z  |
|-----------|----------------|----------------|----------|-----------|--------|--------|----|
| 684.0835  | C42H44N20O26P4 | C42H46N20O26P4 | 684.0849 | 2         | 7.4    | M-H    | 2- |
|           | C45H52N10O32P4 | C45H54N10O32P4 | 684.0855 | 3         | 9.9    | M-H    | 2- |
|           | C41H48N16O30P4 | C41H50N16O30P4 | 684.0842 | 1         | 13     | M-H    | 2- |
|           | C46H48N14O28P4 | C46H50N14O28P4 | 684.0862 | 4         | 15.1   | M-H    | 2- |
|           | C40H52N12O34P4 | C40H54N12O34P4 | 684.0835 | 0.1       | 22.6   | M-H    | 2- |
|           | C37H44N22O28P4 | C37H46N22O28P4 | 684.0828 | -0.9      | 23.6   | M-H    | 2- |
|           | C36H48N18O32P4 | C36H50N18O32P4 | 684.0822 | -1.9      | 33.6   | M-H    | 2- |
|           | C33H40N28O26P4 | C33H42N28O26P4 | 684.0815 | -2.9      | 35.4   | M-H    | 2- |
|           | C35H52N14O36P4 | C35H54N14O36P4 | 684.0815 | -2.9      | 43.8   | M-H    | 2- |
|           | C32H44N24O30P4 | C32H46N24O30P4 | 684.0808 | -3.9      | 45.2   | M-H    | 2- |
|           | C31H44N26O29P4 | C31H46N26O29P4 | 684.0864 | 4.4       | 47.5   | M-H    | 2- |
|           | C34H56N10O40P4 | C34H58N10O40P4 | 684.0808 | -3.8      | 54.1   | M-H    | 2- |
|           | C31H48N20O34P4 | C31H50N20O34P4 | 684.0802 | -4.8      | 55.2   | M-H    | 2- |
|           | C33H56N12O39P4 | C33H58N12O39P4 | 684.0865 | 4.4       | 56.2   | M-H    | 2- |
|           | C30H48N22O33P4 | C30H50N22O33P4 | 684.0858 | 3.4       | 57.5   | M-H    | 2- |

→ Le spectre de masse met en évidence la présence des adduits correspondant à un produit dont la formule brute est la suivante : **Voir colonne « Sum Formula ».**

Im-pUGGU

Composé 7 - Tr = 11.3 min

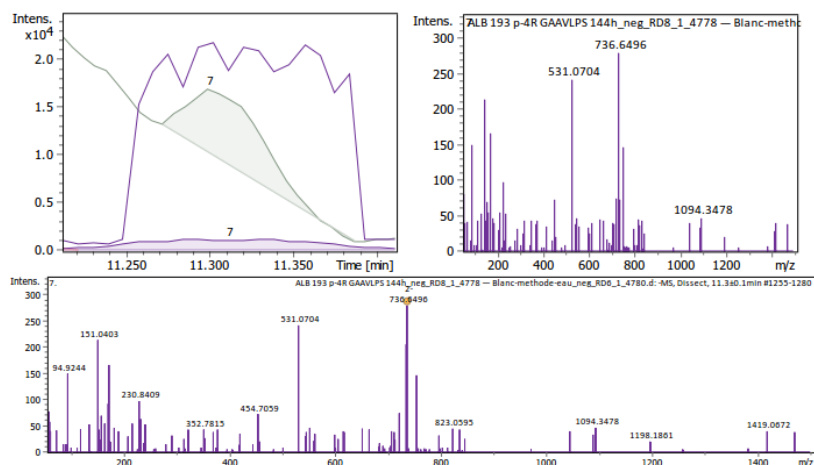

EDC-pUGGU

Composé 8 - Tr = 11.5 min

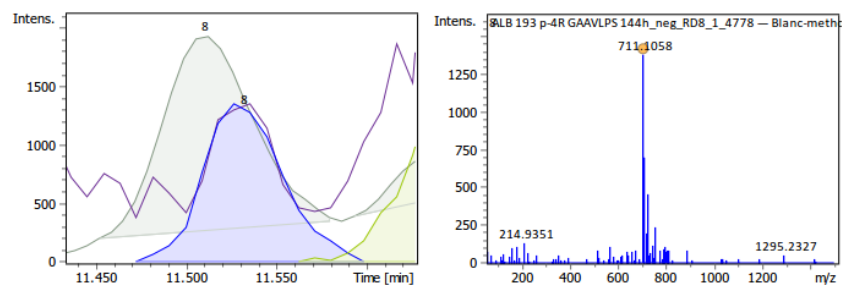

| Meas. m/z | Ion Formula                                                                    | Sum Formula                                                                    | m/z      | err [ppm] | mSigma | Adduct | z  |
|-----------|--------------------------------------------------------------------------------|--------------------------------------------------------------------------------|----------|-----------|--------|--------|----|
| 711.1058  | C <sub>45</sub> H <sub>54</sub> N <sub>16</sub> O <sub>30</sub> P <sub>4</sub> | C <sub>45</sub> H <sub>56</sub> N <sub>16</sub> O <sub>30</sub> P <sub>4</sub> | 711.1077 | 2.6       | 33.9   | M-H    | 2- |

→ Le spectre de masse met en évidence la présence des adduits correspondant à un produit dont la formule brute est la suivante : **C<sub>45</sub>H<sub>56</sub>N<sub>16</sub>O<sub>30</sub>P<sub>4</sub>**

DMAP-pUGGU

Composé 9 - Tr = 11.7 min

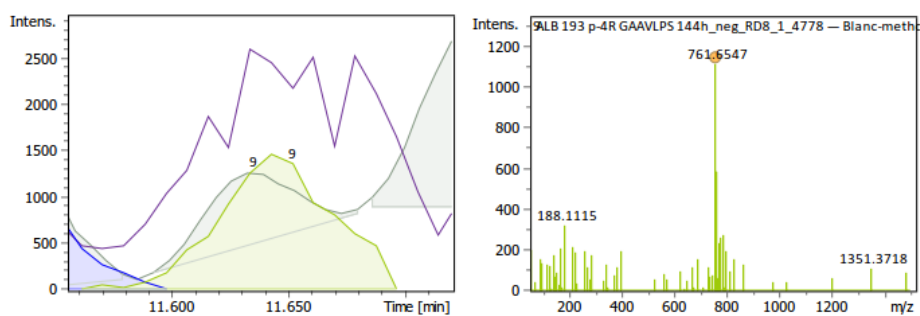

| Meas. m/z | Ion Formula    | Sum Formula    | m/z      | err [ppm] | mSigma | Adduct | z  |
|-----------|----------------|----------------|----------|-----------|--------|--------|----|
| 761.6547  | C35H57N35O27P4 | C35H59N35O27P4 | 761.6562 | 2         | 17.8   | M-H    | 2- |
|           | C31H53N41O25P4 | C31H55N41O25P4 | 761.6549 | 0.2       | 19.4   | M-H    | 2- |
|           | C34H61N31O31P4 | C34H63N31O31P4 | 761.6556 | 1.1       | 20.6   | M-H    | 2- |
|           | C38H65N25O33P4 | C38H67N25O33P4 | 761.6569 | 2.9       | 21.2   | M-H    | 2- |
|           | C39H65N23O34P4 | C39H67N23O34P4 | 761.6513 | -4.5      | 22.6   | M-H    | 2- |
|           | C37H69N21O37P4 | C37H71N21O37P4 | 761.6562 | 2         | 23.4   | M-H    | 2- |
|           | C39H61N29O29P4 | C39H63N29O29P4 | 761.6576 | 3.7       | 24.1   | M-H    | 2- |
|           | C41H73N15O39P4 | C41H75N15O39P4 | 761.6576 | 3.7       | 25.7   | M-H    | 2- |
|           | C40H61N27O30P4 | C40H63N27O30P4 | 761.652  | -3.6      | 26.2   | M-H    | 2- |
|           | C30H57N37O29P4 | C30H59N37O29P4 | 761.6542 | -0.7      | 26.8   | M-H    | 2- |
|           | C40H77N11O43P4 | C40H79N11O43P4 | 761.6569 | 2.9       | 27.2   | M-H    | 2- |
|           | C42H73N13O40P4 | C42H75N13O40P4 | 761.652  | -3.6      | 27.3   | M-H    | 2- |
|           | C33H65N27O35P4 | C33H67N27O35P4 | 761.6549 | 0.2       | 27.5   | M-H    | 2- |
|           | C42H69N19O35P4 | C42H71N19O35P4 | 761.6582 | 4.6       | 28.5   | M-H    | 2- |
|           | C36H73N17O41P4 | C36H75N17O41P4 | 761.6556 | 1.1       | 29.4   | M-H    | 2- |
|           | C43H69N17O36P4 | C43H71N17O36P4 | 761.6526 | -2.8      | 30.7   | M-H    | 2- |
|           | C40H57N33O25P4 | C40H59N33O25P4 | 761.6582 | 4.6       | 30.7   | M-H    | 2- |
|           | C41H57N31O26P4 | C41H59N31O26P4 | 761.6526 | -2.8      | 33.1   | M-H    | 2- |
|           | C32H69N23O39P4 | C32H71N23O39P4 | 761.6542 | -0.7      | 36.1   | M-H    | 2- |
|           | C44H65N21O32P4 | C44H67N21O32P4 | 761.6533 | -1.9      | 37     | M-H    | 2- |
|           | C35H77N13O45P4 | C35H79N13O45P4 | 761.6549 | 0.2       | 37.5   | M-H    | 2- |
|           | C47H73N11O38P4 | C47H75N11O38P4 | 761.654  | -1        | 41.5   | M-H    | 2- |
|           | C45H61N25O28P4 | C45H63N25O28P4 | 761.654  | -1        | 45.1   | M-H    | 2- |
|           | C31H73N19O43P4 | C31H75N19O43P4 | 761.6536 | -1.5      | 45.5   | M-H    | 2- |
|           | C48H69N15O34P4 | C48H71N15O34P4 | 761.6546 | -0.1      | 49.1   | M-H    | 2- |
|           | C30H77N15O47P4 | C30H79N15O47P4 | 761.6529 | -2.4      | 55.3   | M-H    | 2- |
|           | C49H65N19O30P4 | C49H67N19O30P4 | 761.6553 | 0.8       | 57.8   | M-H    | 2- |
|           | C50H61N23O26P4 | C50H63N23O26P4 | 761.656  | 1.6       | 67.3   | M-H    | 2- |

→ Le spectre de masse met en évidence la présence des adduits correspondant à un produit dont la formule brute est la suivante : **Voir colonne « Sum Formula »**.

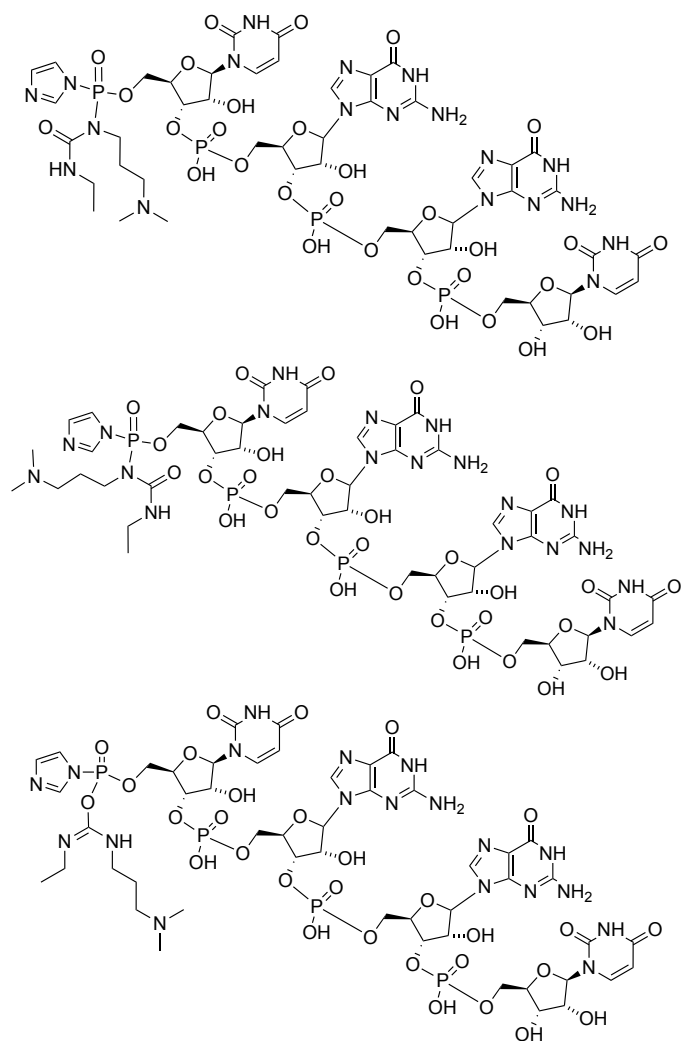

Chemical Formula: C<sub>49</sub>H<sub>67</sub>N<sub>19</sub>O<sub>30</sub>P<sub>4</sub>  
Exact Mass: 1525,33

EDC-Im-pUGGU

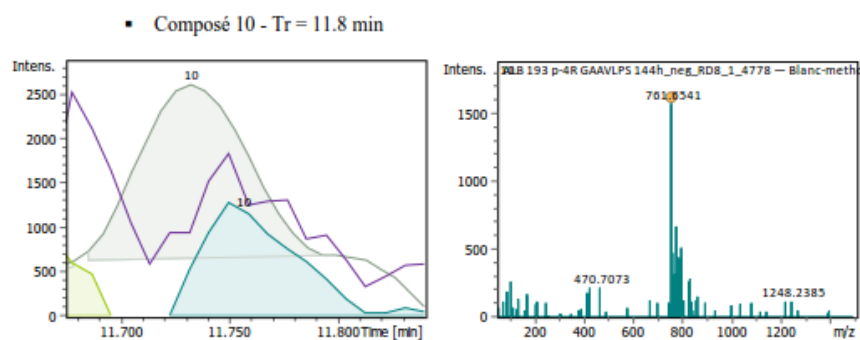

EDC-Im-pUGGU

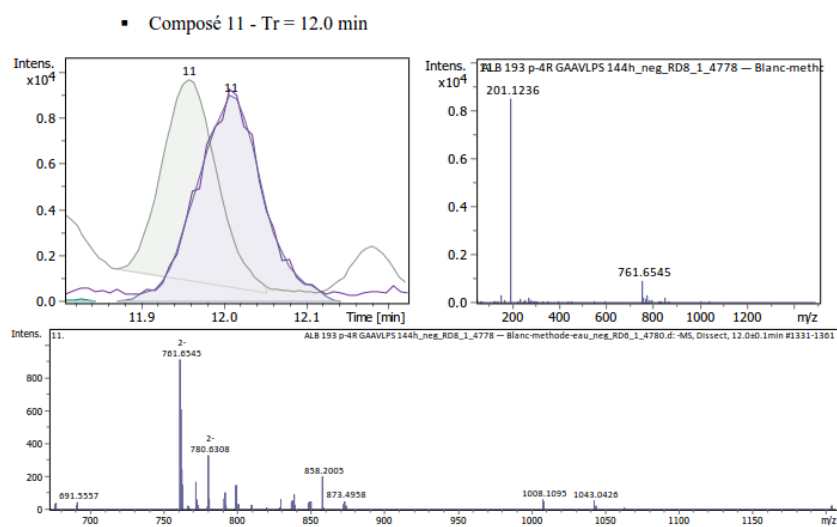

Unidentified derivative

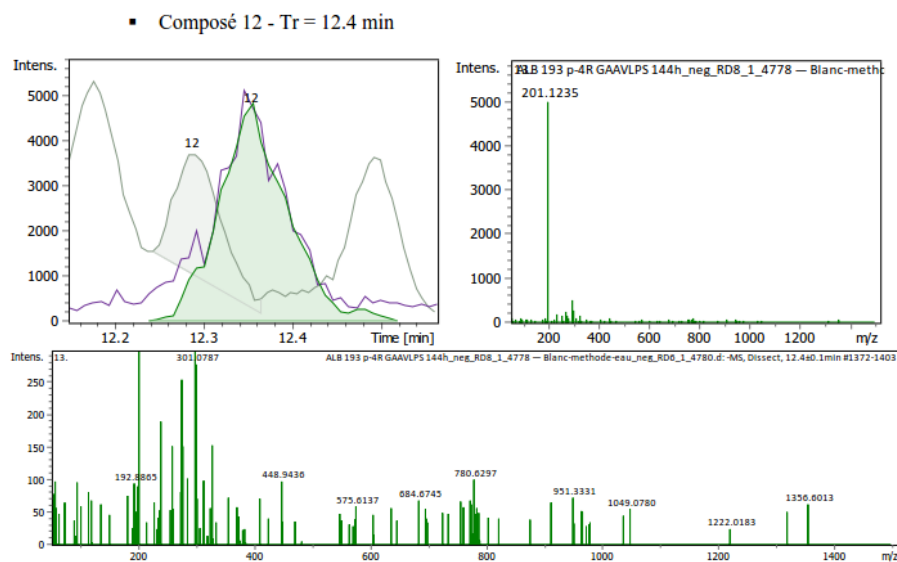

Unidentified derivative

Figure S22. UV (260 nm) and LC-MS chromatogram (negative ion mode), UV peaks and associated compounds obtained for B1 experiment after 120 h of reaction with GAVLPSSA (B1.1).

B1.2 experiment - 235h:

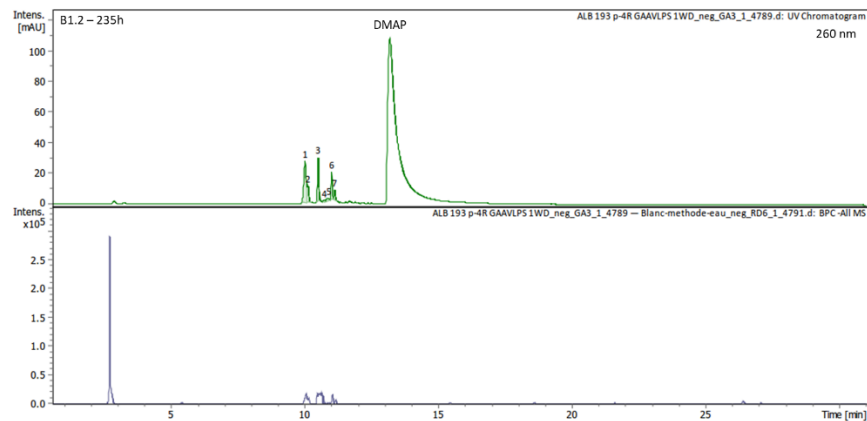

Composé 1 - Tr = 10.0 min

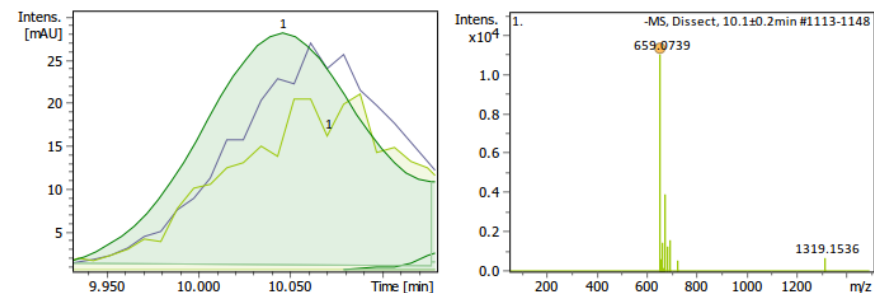

| Meas. m/z | Ion Formula    | Sum Formula    | m/z      | err [ppm] | mSigma | Adduct | z  |
|-----------|----------------|----------------|----------|-----------|--------|--------|----|
| 659.0739  | C38H46N14O31P4 | C38H48N14O31P4 | 659.0707 | -4.7      | 12.7   | M-H    | 2- |

→ Le spectre de masse met en évidence la présence des adduits correspondant à un produit dont la formule brute est la suivante :  $C_{38}H_{48}N_{14}O_{31}P_4$

pUGGU

Composé 2 - Tr = 10.2 min

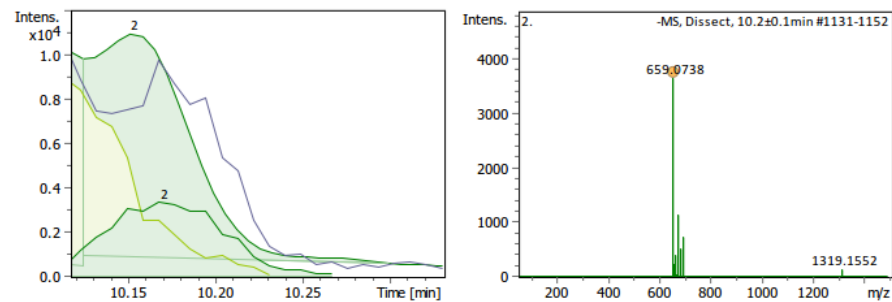

| Meas. m/z | Ion Formula    | Sum Formula    | m/z      | err [ppm] | mSigma | Adduct | z  |
|-----------|----------------|----------------|----------|-----------|--------|--------|----|
| 659.0738  | C38H46N14O31P4 | C38H48N14O31P4 | 659.0707 | -4.7      | 20.6   | M-H    | 2- |

→ Le spectre de masse met en évidence la présence des adduits correspondant à un produit dont la formule brute est la suivante :  $C_{38}H_{48}N_{14}O_{31}P_4$

pUGGU

Composé 3 - Tr = 10.5 min

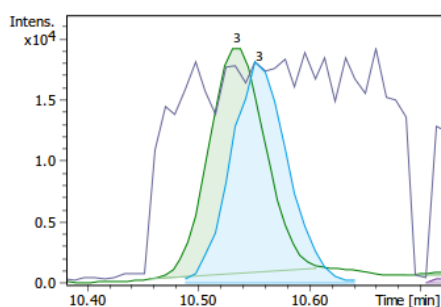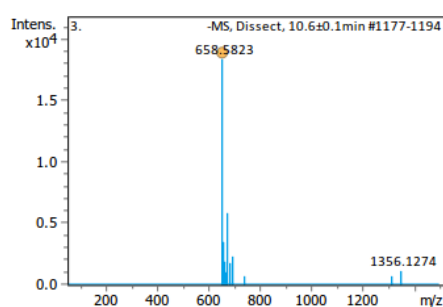

| Meas. m/z | Ion Formula    | Sum Formula    | m/z      | err [ppm] | mSigma | Adduct | z  |
|-----------|----------------|----------------|----------|-----------|--------|--------|----|
| 658.5823  | C38H47N15O30P4 | C38H49N15O30P4 | 658.5787 | -5.4      | 14.3   | M-H    | 2- |

→ Le spectre de masse met en évidence la présence des adduits correspondant à un produit dont la formule brute est la suivante :  $C_{38}H_{49}N_{15}O_{30}P_4$

## H<sub>2</sub>N-pUGGU

Composé 4 - Tr = 10.8 min

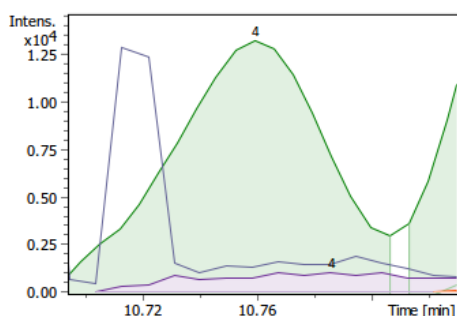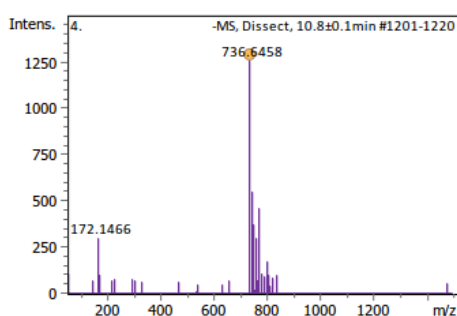

| Meas. m/z | Ion Formula    | Sum Formula    | m/z      | err [ppm] | mSigma | Adduct | z  |
|-----------|----------------|----------------|----------|-----------|--------|--------|----|
| 736.6458  | C46H63N17O31P4 | C46H65N17O31P4 | 736.6419 | -5.4      | 67.1   | M-H    | 2- |

→ Le spectre de masse met en évidence la présence des adduits correspondant à un produit dont la formule brute est la suivante :  $C_{46}H_{65}N_{17}O_{31}P_4$

## EDC-pUGGU

Composé 5 - Tr = 10.9 min

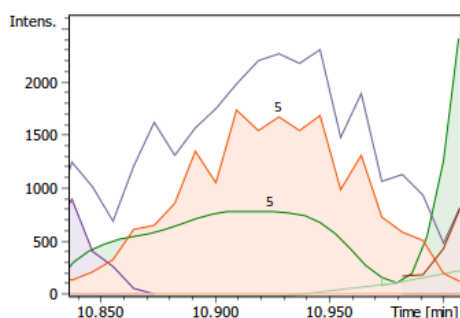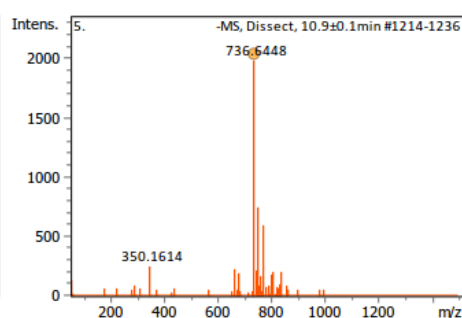

| Meas. m/z | Ion Formula    | Sum Formula    | m/z      | err [ppm] | mSigma | Adduct | z  |
|-----------|----------------|----------------|----------|-----------|--------|--------|----|
| 736.6448  | C46H63N17O31P4 | C46H65N17O31P4 | 736.6419 | -4        | 30     | M-H    | 2- |

→ Le spectre de masse met en évidence la présence des adduits correspondant à un produit dont la formule brute est la suivante :  $C_{46}H_{65}N_{17}O_{31}P_4$

## EDC-pUGGU



Composé 6 - Tr = 11.0 min

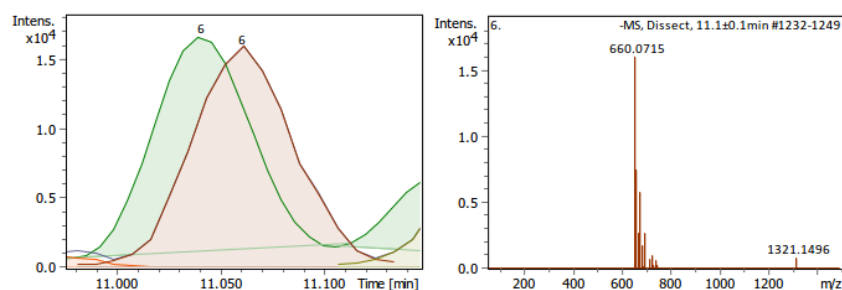

Soit  $M = 660.0715 \times 2 + 2 = 1322.143$  Da

Unidentified derivative

Composé 7 - Tr = 11.2 min

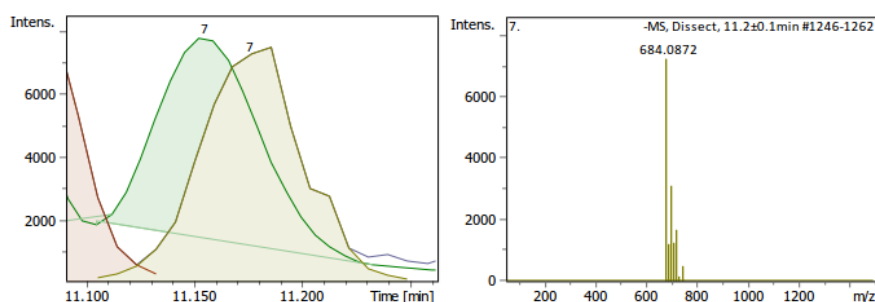

| Meas. m/z | Ion Formula                                                                    | Sum Formula                                                                    | m/z      | err [ppm] | mSigma | Adduct | z  |
|-----------|--------------------------------------------------------------------------------|--------------------------------------------------------------------------------|----------|-----------|--------|--------|----|
| 684.0872  | C <sub>41</sub> H <sub>48</sub> N <sub>16</sub> O <sub>30</sub> P <sub>4</sub> | C <sub>41</sub> H <sub>50</sub> N <sub>16</sub> O <sub>30</sub> P <sub>4</sub> | 684.0842 | -4.5      | 10.5   | M-H    | 2- |

→ Le spectre de masse met en évidence la présence des adduits correspondant à un produit dont la formule brute est la suivante : **C<sub>41</sub>H<sub>50</sub>N<sub>16</sub>O<sub>30</sub>P<sub>4</sub>**

Im-pUGGU

Figure S23. UV (260 nm) and LC-MS chromatogram (negative ion mode), UV peaks and associated compounds obtained for B1 experiment after 240h of reaction with GAVLPsAA and 1 concentration (B1.2).

B1.3 experiment – 240 h:

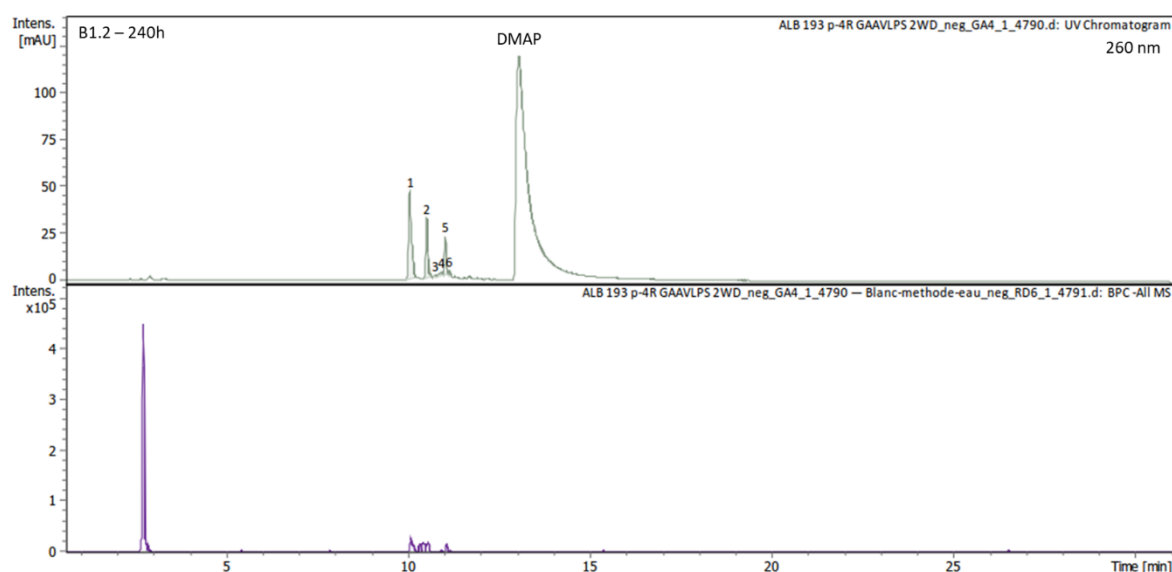

Composé 1 - Tr = 10.0 min

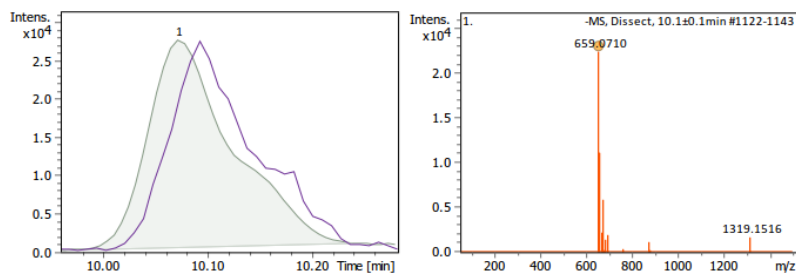

| Meas. m/z | Ion Formula    | Sum Formula    | m/z      | err [ppm] | mSigma | Adduct | z  |
|-----------|----------------|----------------|----------|-----------|--------|--------|----|
| 659.071   | C38H46N14O31P4 | C38H48N14O31P4 | 659.0707 | -0.4      | 8      | M-H    | 2- |

→ Le spectre de masse met en évidence la présence des adduits correspondant à un produit dont la formule brute est la suivante :  $C_{38}H_{48}N_{14}O_{31}P_4$

pUGGU

Composé 2 - Tr = 10.6 min

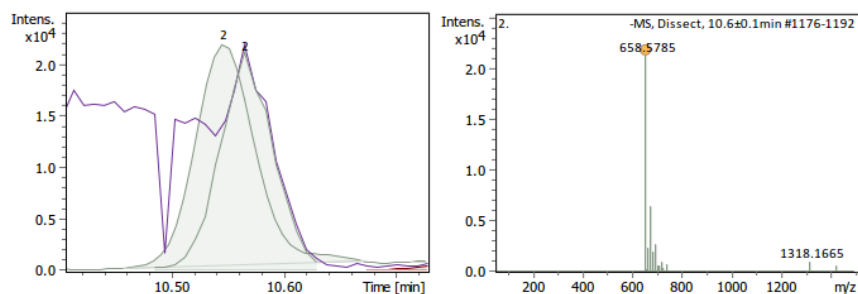

| Meas. m/z | Ion Formula    | Sum Formula    | m/z      | err [ppm] | mSigma | Adduct | z  |
|-----------|----------------|----------------|----------|-----------|--------|--------|----|
| 658.5785  | C38H47N15O30P4 | C38H49N15O30P4 | 658.5787 | 0.4       | 18.2   | M-H    | 2- |

→ Le spectre de masse met en évidence la présence des adduits correspondant à un produit dont la formule brute est la suivante :  $C_{38}H_{49}N_{15}O_{30}P_4$

H<sub>2</sub>N-pUGGU

Composé 3 - Tr = 10.8 min

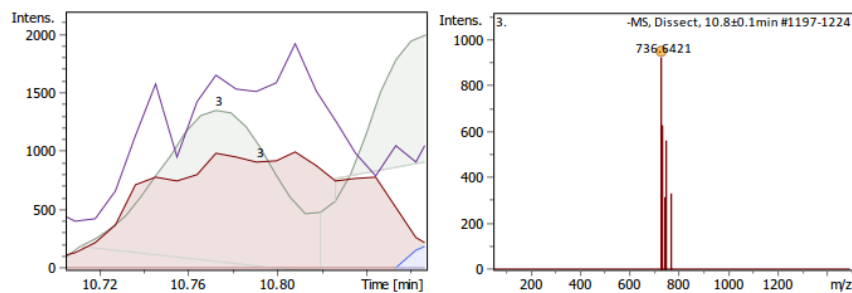

| Meas. m/z | Ion Formula    | Sum Formula    | m/z      | err [ppm] | mSigma | Adduct | z  |
|-----------|----------------|----------------|----------|-----------|--------|--------|----|
| 736.6421  | C46H63N17O31P4 | C46H65N17O31P4 | 736.6419 | -0.4      | 54.3   | M-H    | 2- |

→ Le spectre de masse met en évidence la présence des adduits correspondant à un produit dont la formule brute est la suivante :  $C_{46}H_{65}N_{17}O_{31}P_4$

EDC-pUGGU

Composé 4 - Tr = 10.9 min

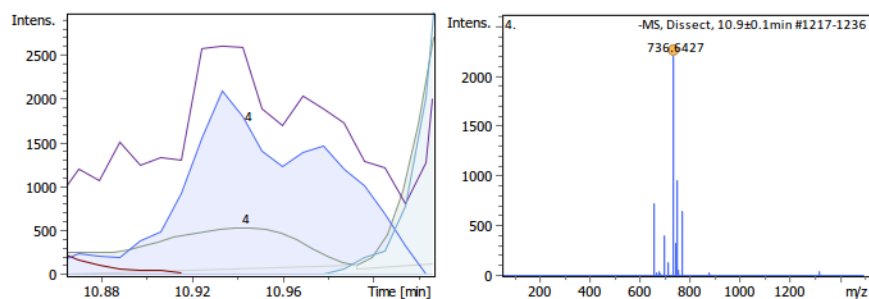

| Meas. m/z | Ion Formula                                                                    | Sum Formula                                                                    | m/z      | err [ppm] | mSigma | Adduct | z  |
|-----------|--------------------------------------------------------------------------------|--------------------------------------------------------------------------------|----------|-----------|--------|--------|----|
| 736.6427  | C <sub>46</sub> H <sub>63</sub> N <sub>17</sub> O <sub>31</sub> P <sub>4</sub> | C <sub>46</sub> H <sub>65</sub> N <sub>17</sub> O <sub>31</sub> P <sub>4</sub> | 736.6419 | -1.1      | 24.4   | M-H    | 2- |

→ Le spectre de masse met en évidence la présence des adduits correspondant à un produit dont la formule brute est la suivante : **C<sub>46</sub>H<sub>65</sub>N<sub>17</sub>O<sub>31</sub>P<sub>4</sub>**

EDC-pUGGU

Composé 5 - Tr = 11.1 min

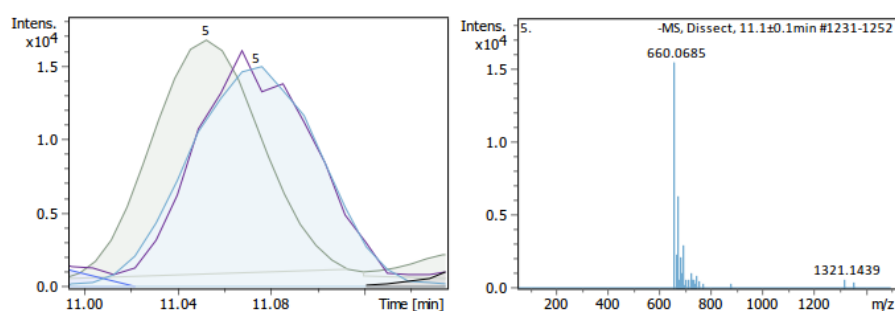

Soit  $M = 660.0685 \times 2 + 2 = 1322.137$  Da

Unidentified derivative

Composé 6 - Tr = 11.2 min

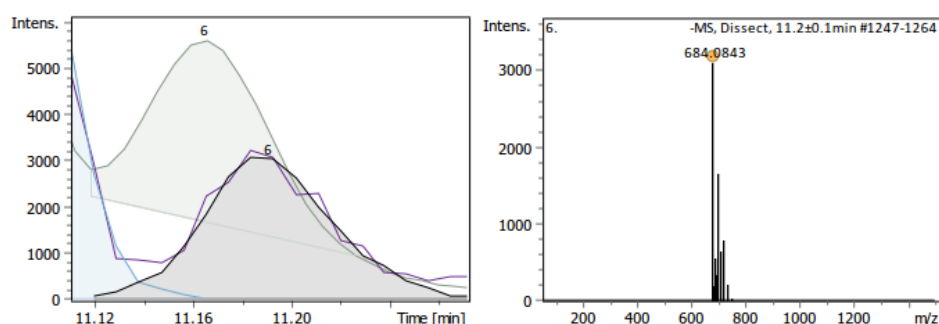

| Meas. m/z | Ion Formula                                                                    | Sum Formula                                                                    | m/z      | err [ppm] | mSigma | Adduct | z  |
|-----------|--------------------------------------------------------------------------------|--------------------------------------------------------------------------------|----------|-----------|--------|--------|----|
| 684.0843  | C <sub>41</sub> H <sub>48</sub> N <sub>16</sub> O <sub>30</sub> P <sub>4</sub> | C <sub>41</sub> H <sub>50</sub> N <sub>16</sub> O <sub>30</sub> P <sub>4</sub> | 684.0842 | -0.1      | 30     | M-H    | 2- |

→ Le spectre de masse met en évidence la présence des adduits correspondant à un produit dont la formule brute est la suivante : **C<sub>41</sub>H<sub>50</sub>N<sub>16</sub>O<sub>30</sub>P<sub>4</sub>**

Im-pUGGU

Figure S24. UV (260 nm) and LC-MS chromatogram (negative ion mode), UV peaks and associated compounds obtained for B1 experiment after 245 h of reaction with GAVLPsAA and 2 concentrations (B1.3).

## B2 experiment – 0 h:

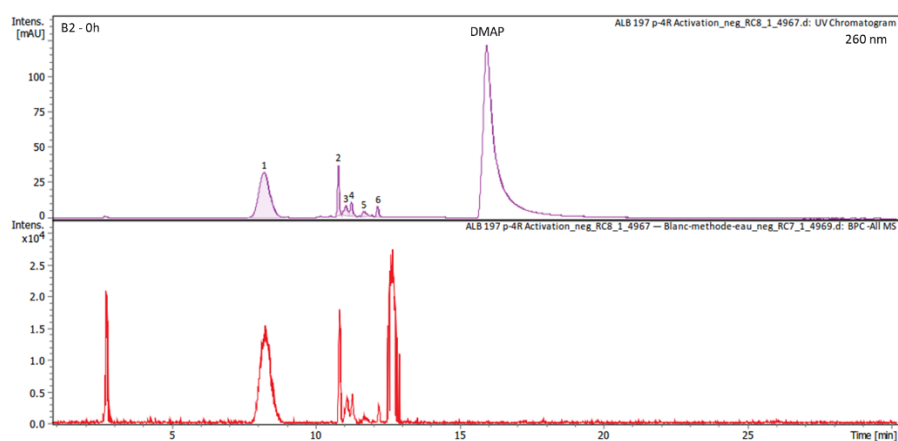

- Composé 1 - Tr = 8.3 min

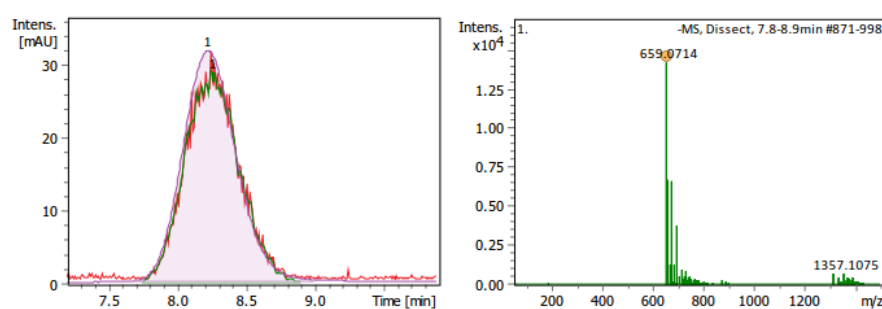

| Meas. m/z | Ion Formula    | Sum Formula    | m/z      | err [ppm] | mSigma | Adduct | z  |
|-----------|----------------|----------------|----------|-----------|--------|--------|----|
| 659.0714  | C38H46N14O31P4 | C38H48N14O31P4 | 659.0707 | -0.9      | 6      | M-H    | 2- |

→ Le spectre de masse met en évidence la présence des adduits correspondant à un produit dont la formule brute est la suivante :  $C_{38}H_{48}N_{14}O_{31}P_4$ .

## pUGGU

- Composé 2 - Tr = 10.8 min

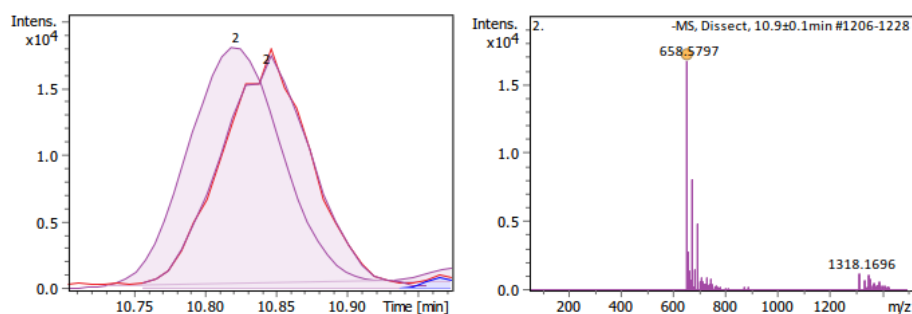

| Meas. m/z | Ion Formula    | Sum Formula    | m/z      | err [ppm] | mSigma | Adduct | z  |
|-----------|----------------|----------------|----------|-----------|--------|--------|----|
| 658.5797  | C38H47N15O30P4 | C38H49N15O30P4 | 658.5787 | -1.5      | 6.1    | M-H    | 2- |

→ Le spectre de masse met en évidence la présence des adduits correspondant à un produit dont la formule brute est la suivante :  $C_{38}H_{49}N_{15}O_{30}P_4$ .

## H<sub>2</sub>N-pUGGU

▪ Composé 3 - Tr = 11.1 min

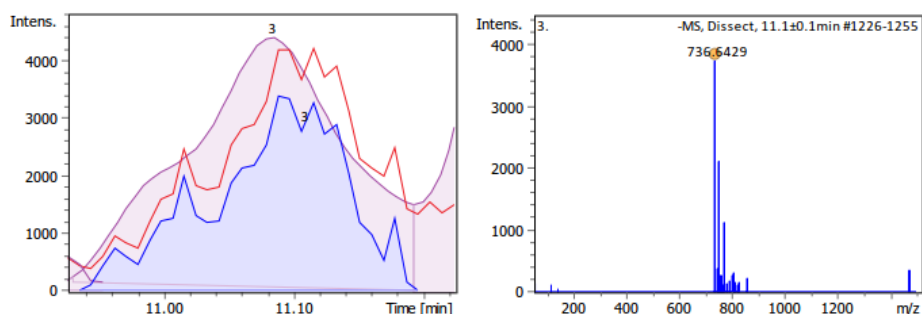

| Meas. m/z | Ion Formula                                                                    | Sum Formula                                                                    | m/z      | err [ppm] | mSigma | Adduct | z  |
|-----------|--------------------------------------------------------------------------------|--------------------------------------------------------------------------------|----------|-----------|--------|--------|----|
| 736.6429  | C <sub>46</sub> H <sub>63</sub> N <sub>17</sub> O <sub>31</sub> P <sub>4</sub> | C <sub>46</sub> H <sub>65</sub> N <sub>17</sub> O <sub>31</sub> P <sub>4</sub> | 736.6419 | -1.4      | 38.6   | M-H    | 2- |

→ Le spectre de masse met en évidence la présence des adduits correspondant à un produit dont la formule brute est la suivante : **C<sub>46</sub>H<sub>65</sub>N<sub>17</sub>O<sub>31</sub>P<sub>4</sub>**.

EDC-pUGGU

▪ Composé 4 - Tr = 11.3 min

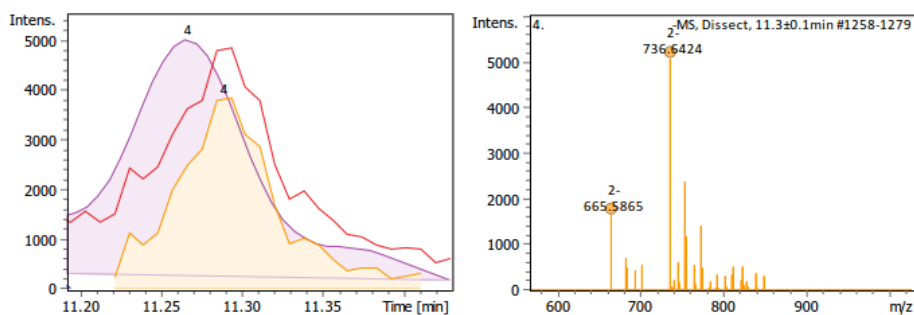

| Meas. m/z | Ion Formula                                                                    | Sum Formula                                                                    | m/z      | err [ppm] | mSigma | Adduct | z  |
|-----------|--------------------------------------------------------------------------------|--------------------------------------------------------------------------------|----------|-----------|--------|--------|----|
| 665.5865  | C <sub>46</sub> H <sub>45</sub> N <sub>15</sub> O <sub>25</sub> P <sub>4</sub> | C <sub>46</sub> H <sub>47</sub> N <sub>15</sub> O <sub>25</sub> P <sub>4</sub> | 665.5836 | -4.3      | 44.3   | M-H    | 2- |
|           | C <sub>40</sub> H <sub>45</sub> N <sub>19</sub> O <sub>26</sub> P <sub>4</sub> | C <sub>40</sub> H <sub>47</sub> N <sub>19</sub> O <sub>26</sub> P <sub>4</sub> | 665.5872 | 1.1       | 45.6   | M-H    | 2- |
|           | C <sub>39</sub> H <sub>49</sub> N <sub>15</sub> O <sub>30</sub> P <sub>4</sub> | C <sub>39</sub> H <sub>51</sub> N <sub>15</sub> O <sub>30</sub> P <sub>4</sub> | 665.5866 | 0.1       | 52.8   | M-H    | 2- |
| 736.6424  | C <sub>46</sub> H <sub>63</sub> N <sub>17</sub> O <sub>31</sub> P <sub>4</sub> | C <sub>46</sub> H <sub>65</sub> N <sub>17</sub> O <sub>31</sub> P <sub>4</sub> | 736.6419 | -0.7      | 10.7   | M-H    | 2- |

→ Le spectre de masse met en évidence la présence des adduits correspondant à un produit dont la formule brute est la suivante : **Voir colonne « Sum Formula »**.

Major compound: EDC-pUGGU

▪ Composé 5 - Tr = 11.7 min

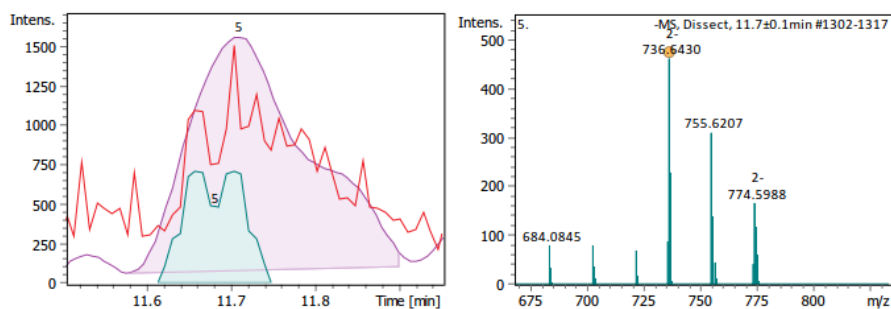

| Meas. m/z | Ion Formula                                                                    | Sum Formula                                                                    | m/z      | err [ppm] | mSigma | Adduct | z  |
|-----------|--------------------------------------------------------------------------------|--------------------------------------------------------------------------------|----------|-----------|--------|--------|----|
| 684.0845  | C <sub>41</sub> H <sub>48</sub> N <sub>16</sub> O <sub>30</sub> P <sub>4</sub> | C <sub>41</sub> H <sub>50</sub> N <sub>16</sub> O <sub>30</sub> P <sub>4</sub> | 684.0842 | -0.5      | 76     | M-H    | 2- |
| 736.643   | C <sub>46</sub> H <sub>63</sub> N <sub>17</sub> O <sub>31</sub> P <sub>4</sub> | C <sub>46</sub> H <sub>65</sub> N <sub>17</sub> O <sub>31</sub> P <sub>4</sub> | 736.6419 | -1.5      | 50.7   | M-H    | 2- |

→ Le spectre de masse met en évidence la présence des adduits correspondant à un produit dont la formule brute est la suivante : **Voir colonne « Sum Formula »**.

Major compound: EDC-pUGGU

▪ Composé 6 - Tr = 12.2 min

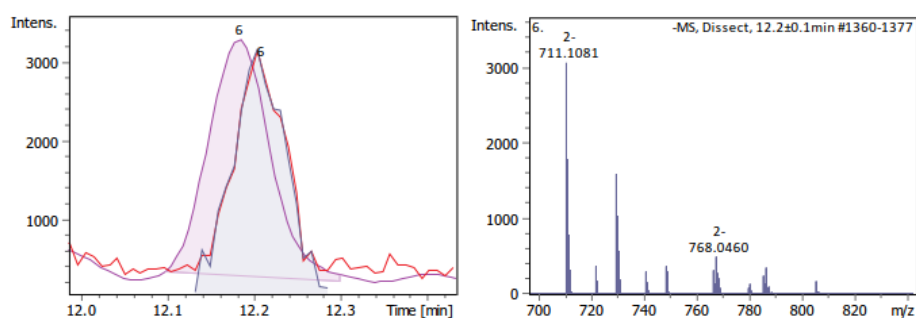

| Meas. m/z | Ion Formula    | Sum Formula    | m/z      | err [ppm] | mSigma | Adduct | z  |
|-----------|----------------|----------------|----------|-----------|--------|--------|----|
| 711.1081  | C46H50N20O26P4 | C46H52N20O26P4 | 711.1083 | 0.4       | 24.2   | M-H    | 2- |
|           | C45H54N16O30P4 | C45H56N16O30P4 | 711.1077 | -0.6      | 26.6   | M-H    | 2- |
|           | C41H50N22O28P4 | C41H52N22O28P4 | 711.1063 | -2.5      | 37.3   | M-H    | 2- |
|           | C40H54N18O32P4 | C40H56N18O32P4 | 711.1056 | -3.4      | 44.3   | M-H    | 2- |
|           | C39H54N20O31P4 | C39H56N20O31P4 | 711.1113 | 4.5       | 46.9   | M-H    | 2- |
|           | C38H58N16O35P4 | C38H60N16O35P4 | 711.1106 | 3.6       | 55     | M-H    | 2- |

→ Le spectre de masse met en évidence la présence des adduits correspondant à un produit dont la formule brute est la suivante : Voir colonne « Sum Formula ».

Major compound: DMAP-pUGGU

Figure S25. UV (260 nm) and LC-MS chromatograms (negative ion mode), UV peaks and associated compounds obtained for C3 experiment before the reaction with GAVLPSAA (0 h).

**B2 experiment – 312 h:**

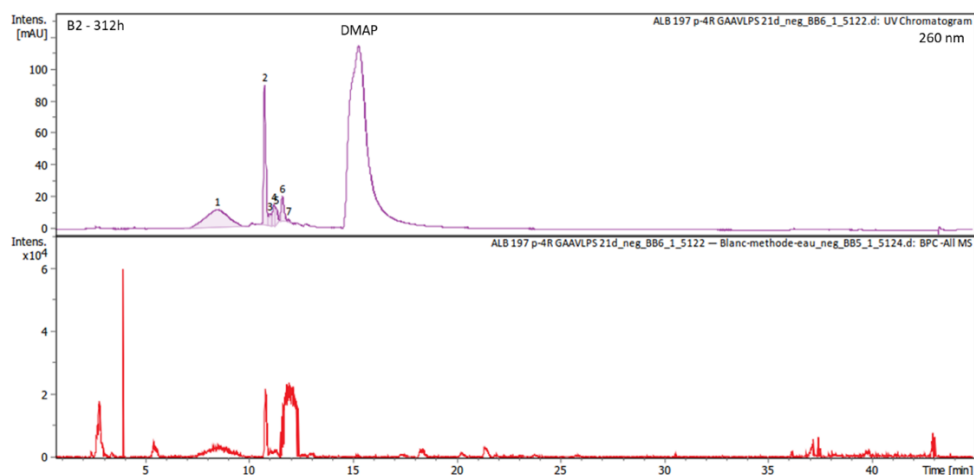

▪ Composé 1 - Tr = 8.5 min

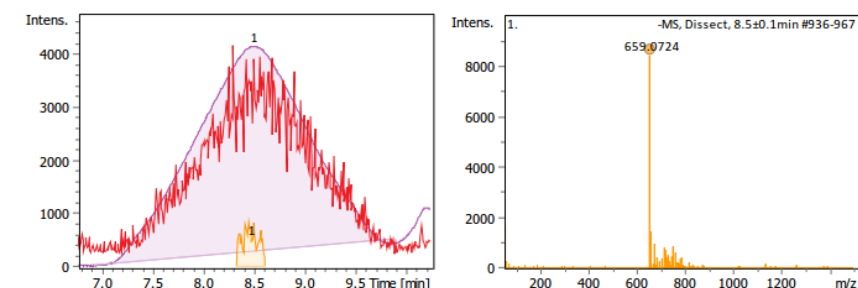

| Meas. m/z | Ion Formula    | Sum Formula    | m/z      | err [ppm] | mSigma | Adduct | z  |
|-----------|----------------|----------------|----------|-----------|--------|--------|----|
| 659.0724  | C38H46N14O31P4 | C38H48N14O31P4 | 659.0707 | -2.4      | 147.2  | M-H    | 2- |

→ Le spectre de masse met en évidence la présence des adduits correspondant à un produit dont la formule brute est la suivante :  $C_{38}H_{48}N_{14}O_{31}P_4$ .

pUGGU

▪ Composé 2 - Tr = 10.8 min

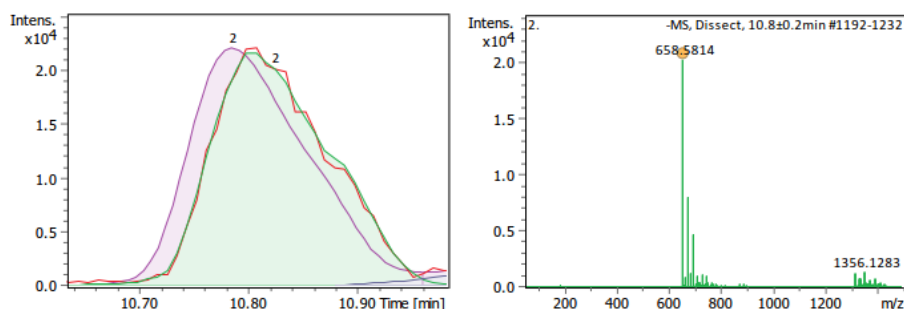

| Meas. m/z | Ion Formula    | Sum Formula    | m/z      | err [ppm] | mSigma | Adduct | z  |
|-----------|----------------|----------------|----------|-----------|--------|--------|----|
| 658.5814  | C38H47N15O30P4 | C38H49N15O30P4 | 658.5787 | -4.1      | 7.4    | M-H    | 2- |

→ Le spectre de masse met en évidence la présence des adduits correspondant à un produit dont la formule brute est la suivante : **C<sub>38</sub>H<sub>49</sub>N<sub>15</sub>O<sub>30</sub>P<sub>4</sub>**.

H<sub>2</sub>N-pUGGU

▪ Composé 3 - Tr = 11.1 min

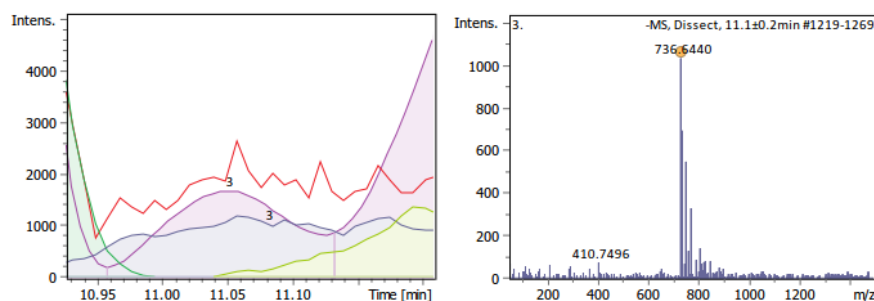

| Meas. m/z | Ion Formula    | Sum Formula    | m/z      | err [ppm] | mSigma | Adduct | z  |
|-----------|----------------|----------------|----------|-----------|--------|--------|----|
| 736.644   | C46H63N17O31P4 | C46H65N17O31P4 | 736.6419 | -2.9      | 49.6   | M-H    | 2- |

→ Le spectre de masse met en évidence la présence des adduits correspondant à un produit dont la formule brute est la suivante : **C<sub>46</sub>H<sub>65</sub>N<sub>17</sub>O<sub>31</sub>P<sub>4</sub>**.

EDC-pUGGU

▪ Composé 4 - Tr = 11.3 min

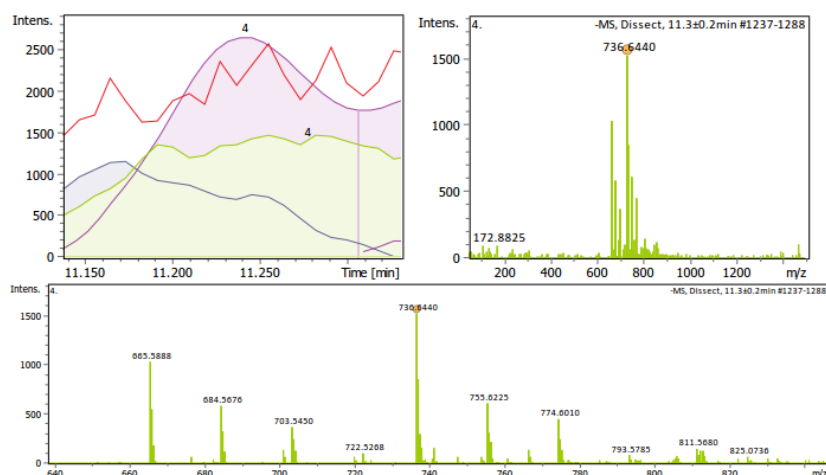

| Meas. m/z | Ion Formula    | Sum Formula    | m/z      | err [ppm] | mSigma | Adduct | z  |
|-----------|----------------|----------------|----------|-----------|--------|--------|----|
| 736.644   | C46H63N17O31P4 | C46H65N17O31P4 | 736.6419 | -2.9      | 22.7   | M-H    | 2- |

→ Le spectre de masse met en évidence la présence des adduits correspondant à un produit dont la formule brute est la suivante : **C<sub>46</sub>H<sub>65</sub>N<sub>17</sub>O<sub>31</sub>P<sub>4</sub>**.

Ainsi qu'une autre espèce, [M-H]<sup>-</sup> = 665.5888Da

Major compound: EDC-pUGGU

■ Composé 5 - Tr = 11.4 min

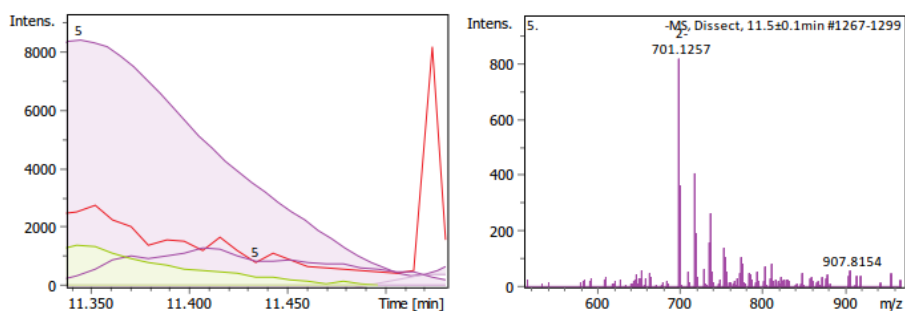

Unidentified derivative

■ Composé 6 - Tr = 11.7 min

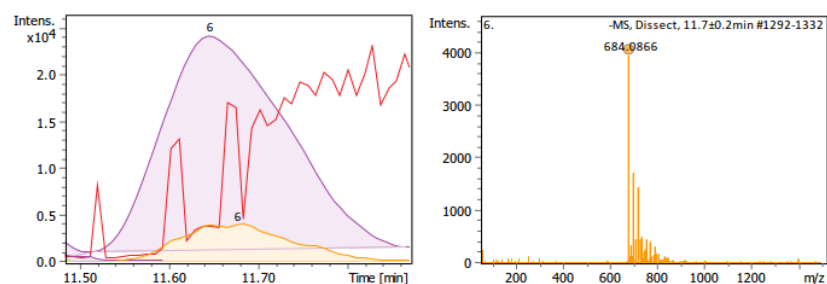

| Meas. m/z | Ion Formula                                                                    | Sum Formula                                                                    | m/z      | err [ppm] | mSigma | Adduct | z  |
|-----------|--------------------------------------------------------------------------------|--------------------------------------------------------------------------------|----------|-----------|--------|--------|----|
| 684.0866  | C <sub>41</sub> H <sub>48</sub> N <sub>16</sub> O <sub>30</sub> P <sub>4</sub> | C <sub>41</sub> H <sub>50</sub> N <sub>16</sub> O <sub>30</sub> P <sub>4</sub> | 684.0842 | -3.5      | 8.9    | M-H    | 2- |

→ Le spectre de masse met en évidence la présence des adduits correspondant à un produit dont la formule brute est la suivante : **C<sub>41</sub>H<sub>50</sub>N<sub>16</sub>O<sub>30</sub>P<sub>4</sub>**.

Im-pUGGU

■ Composé 7 - Tr = 12.1 min

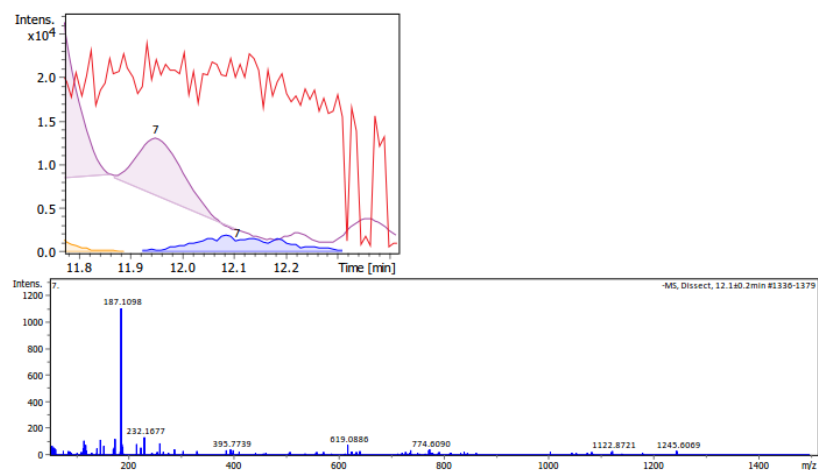

Unidentified derivative



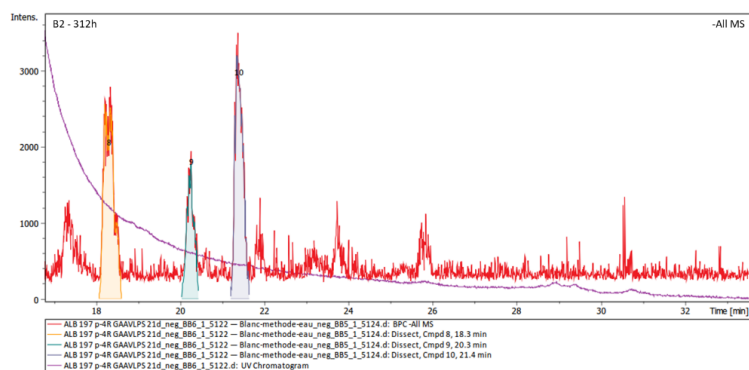

PIC 8

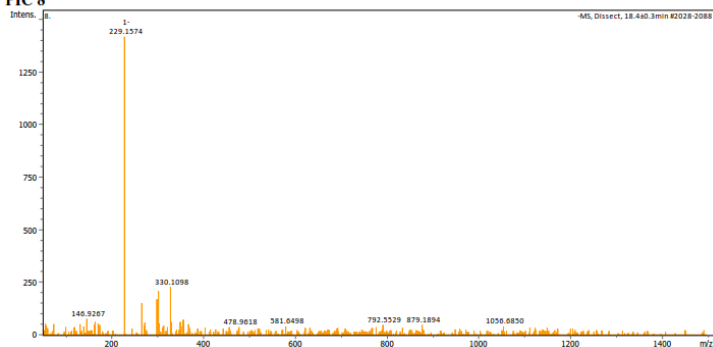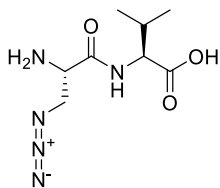

Chemical Formula:  $C_8H_{15}N_5O_3$   
Exact Mass: 229,12

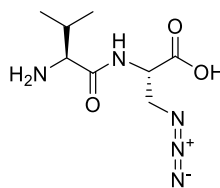

Chemical Formula:  $C_8H_{15}N_5O_3$   
Exact Mass: 229,12

Azidoalaninyl-valine (left) or valinyl-azidoalanine (right)

PIC 9

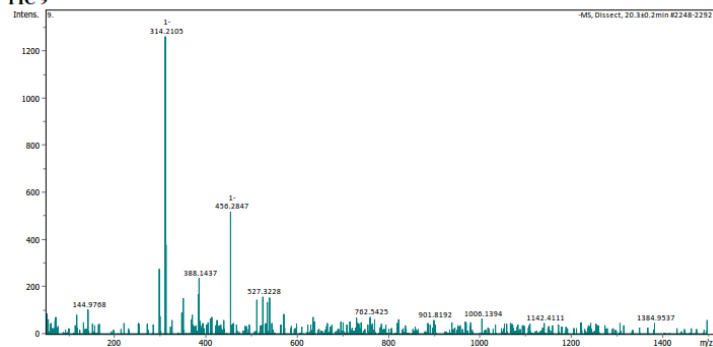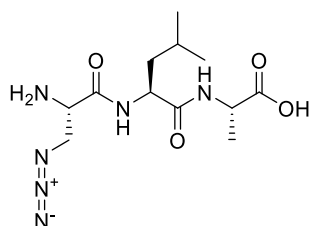

Chemical Formula:  $C_{12}H_{22}N_6O_4$   
Exact Mass: 314,17

### Azidoalaninyl-alaninyl-leucine (or sequence isomers)

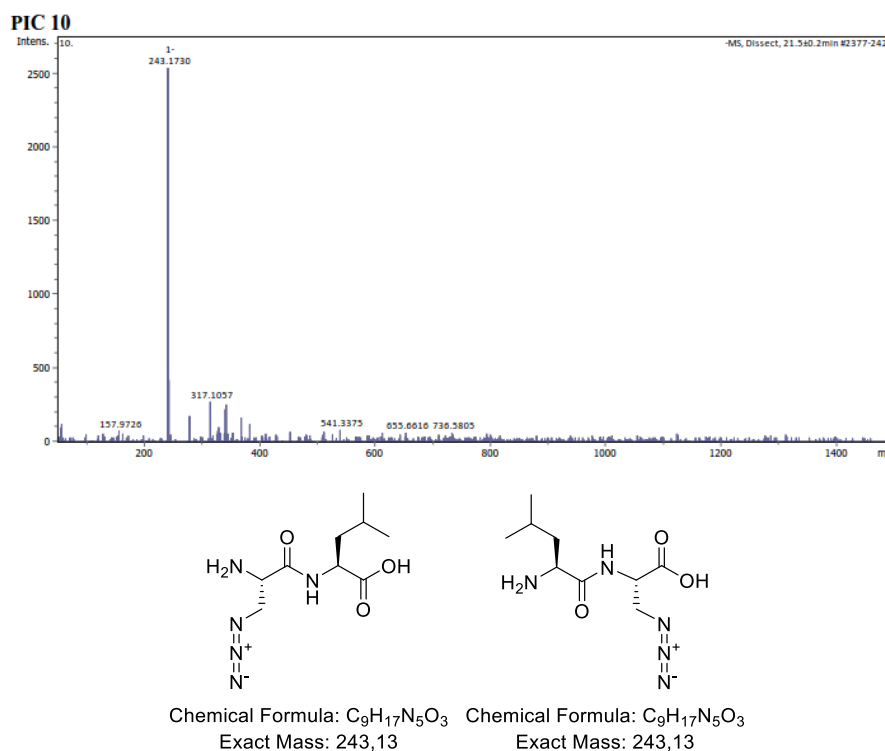

### Azidoalaninyl-leucine (left) or leucinyl-azidoalanine (right)

Figure S26. UV (260 nm) and LC-MS chromatograms (negative ion mode), UV peaks, MS peaks and associated compounds obtained for B2 experiment after reaction with GAVLPsAA (312 h).

In order to see if our conditions were compatible with the presence of prebiotic lipidic vesicles, their formation was tested by gentle hydration from dried lipids. For that, 0.5 mL of a methanolic concentrated mixture of lipids containing 10 mM LA:MLG:DLPA (1:1:1) (6.66 mg of LA, 10.9 mg of MLG and 17.1 mg of DLPA in 10 mL of methanol) was diluted in a flask with 0.5 mL of MeOH (5 mM final concentration + 0.02 mol% of DOPE-Rhodamine). The solvent was evaporated using a rotavapor and a bath at 40°C to form a thin lipidic film. After dehydration overnight, the film was rehydrated overnight at room temperature with 1 mL of a buffer solution containing 1 mM EDC and 1 mM DMAP at pH 6.5 (adjusted with 100 mM HCl) prepared as previously for the coupling experiments. After hydration over 16 sh at room temperature, the samples were observed using epifluorescence microscopy but no GV were detected.

### 3)4) Coupling attempts with NCA in the presence of EDC and EtIm

These experiments were performed very similarly but in one step:

The previously synthesized RNA pUGGU (50  $\mu$ M, 1 eq, concentration calculated from the UV absorbance at 260 nm and the online service OligoCalc™) was added to 7.5 or 75 equivalents of EtIm (375  $\mu$ M or 3.75 mM) (C1 or C2 experiment). For that, 3.60 mg of EtIm was dissolved in 1 mL of ultrapure water for a concentrated solution of 37.5 mM later diluted 100 or 10 times (C1 or C2 experiment) to reach the desired concentration in ultrapure water. Then, the pH was adjusted to 8.0 adding 100 mM HCl. Afterwards, 20 or 200 equivalents of EDC (1 mM or 10 mM) (C1 or C2 experiment) were added from a concentrated solution (100 mM, 15.5 mg in 1 mL). The pH was adjusted to 8.0 adding 100 mM NaOH. 20 “equivalents” (950  $\mu$ M, C1 experiment) or 200 “equivalents” (9.5 mM, C2 experiment) of GAVLAA

NCA were added from a concentrated solution (200 mM) prepared as described previously (Scheme S1). The pH was then adjusted to 8.0 adding 100 mM HCl. The reactions were then left in an Eppendorf vial for 336 h at ambient temperature and without shaking. The pH was checked regularly and remained stable around the pH set after the addition of GAVLAA NCA. 50  $\mu$ L of the solutions were sampled during the reaction or at least the end of the incubation for LC-MS analysis.

All the products of reaction were analysed using LC-MS with a *Gemini*<sup>TM</sup> C18 column (250  $\times$  4.6 mm, 5  $\mu$ m, *Phenomenex*<sup>®</sup>). The oligonucleotides were separated at 1.0 mL/min using a binary linear gradient from 2 to 44 % B in 28 min using eluants A) 5 mM NH<sub>4</sub>OAc pH 8.0 and B) CH<sub>3</sub>CN/A 95/5 (Fig. S27-28).

### C1 experiment – 336 h:

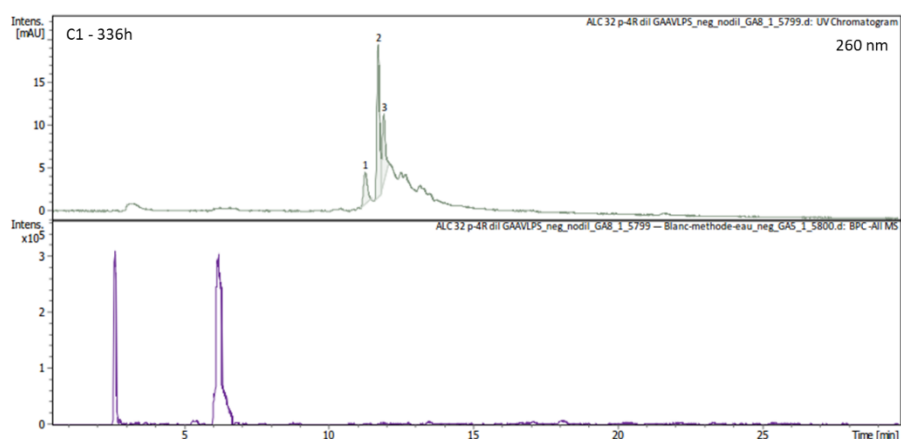

■ Composé 1 - Tr = 11.3 min

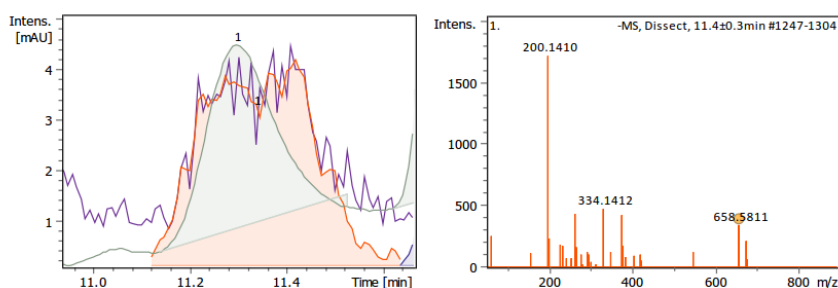

| Meas. m/z | Ion Formula    | Sum Formula    | m/z      | err [ppm] | mSigma | Adduct | z  |
|-----------|----------------|----------------|----------|-----------|--------|--------|----|
| 658.5811  | C38H47N15O30P4 | C38H49N15O30P4 | 658.5787 | -3.5      | 90.5   | M-H    | 2- |

→ Le spectre de masse met en évidence la présence des adduits correspondant à un produit dont la formule brute est la suivante : C<sub>38</sub>H<sub>49</sub>N<sub>15</sub>O<sub>30</sub>P<sub>4</sub>.

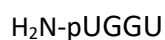

Composé 2 - Tr = 11.8 min

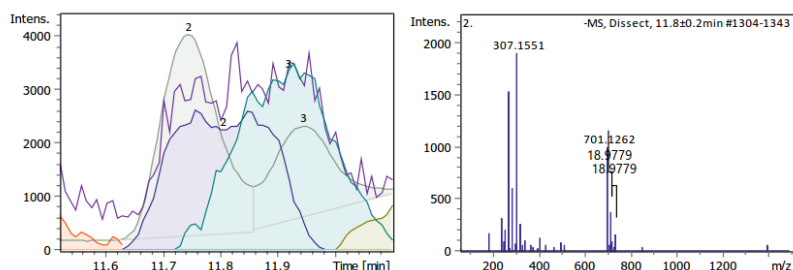

| Meas. m/z | Ion Formula    | Sum Formula    | m/z      | err [ppm] | mSigma | Adduct | z  |
|-----------|----------------|----------------|----------|-----------|--------|--------|----|
| 701.1262  | C40H63N16O30P5 | C40H65N16O30P5 | 701.1298 | 5         | 9.7    | M-H    | 2- |
|           | C43H58N16O30P4 | C43H60N16O30P4 | 701.1233 | -4.2      | 21.5   | M-H    | 2- |

→ Le spectre de masse met en évidence la présence des adduits correspondant à un produit dont la formule brute est la suivante : **Voir colonne « Sum Formula »**.

## Unidentified derivative

Composé 3 - Tr = 11.9 min

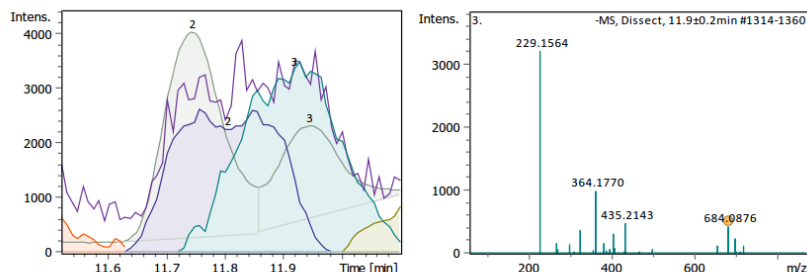

| Meas. m/z | Ion Formula    | Sum Formula    | m/z      | err [ppm] | mSigma | Adduct | z  |
|-----------|----------------|----------------|----------|-----------|--------|--------|----|
| 684.0876  | C41H48N16O30P4 | C41H50N16O30P4 | 684.0842 | -5        | 36.9   | M-H    | 2- |

→ Le spectre de masse met en évidence la présence des adduits correspondant à un produit dont la formule brute est la suivante : **C<sub>41</sub>H<sub>50</sub>N<sub>16</sub>O<sub>30</sub>P<sub>4</sub>**.

## Im-pUGGU

Composé 4 - Tr = 12.2 min

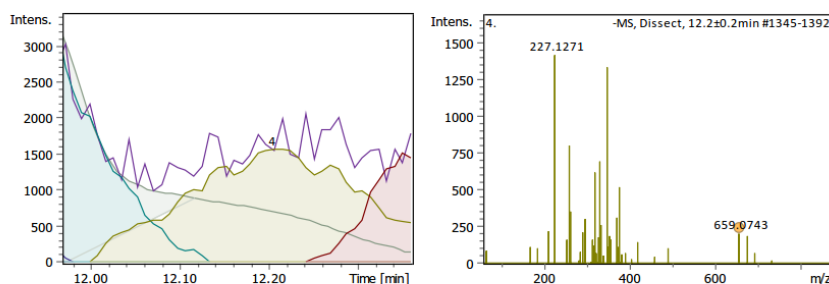

| Meas. m/z | Ion Formula    | Sum Formula    | m/z      | err [ppm] | mSigma | Adduct | z  |
|-----------|----------------|----------------|----------|-----------|--------|--------|----|
| 659.0743  | C38H46N14O31P4 | C38H48N14O31P4 | 659.0707 | -5.5      | 151.1  | M-H    | 2- |

→ Le spectre de masse met en évidence la présence des adduits correspondant à un produit dont la formule brute est la suivante : **C<sub>38</sub>H<sub>48</sub>N<sub>14</sub>O<sub>31</sub>P<sub>4</sub>**.

## H<sub>2</sub>N-pUGGU

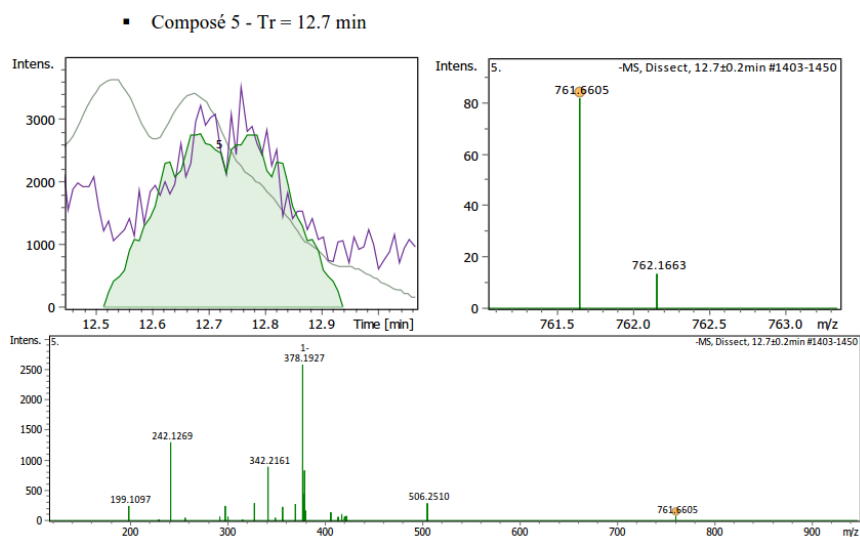

### EDC-Im-pUGGU

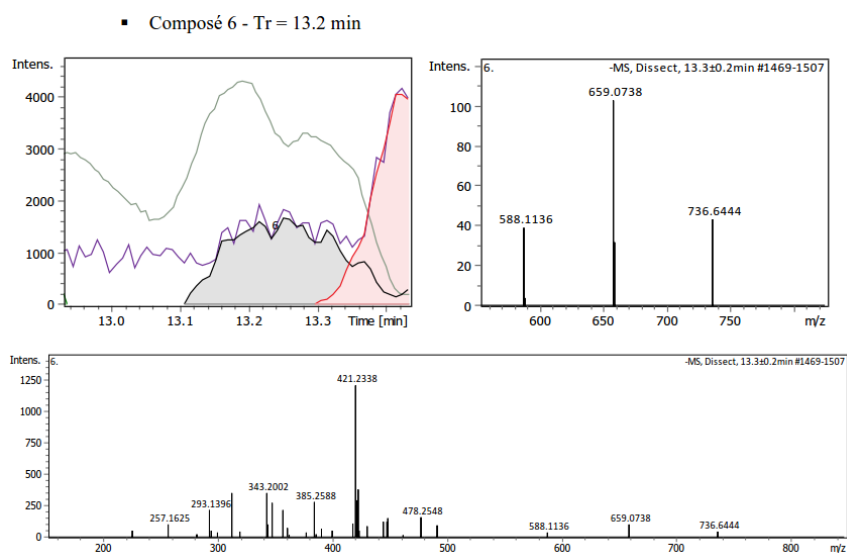

### pUGGU and EDC-pUGGU

Figure S27. UV (260 nm) and LC-MS chromatograms (negative ion mode), UV peaks, MS peaks and associated compounds obtained for C1 experiment after reaction with GAVLAA NCA (336 h).

## C2 experiment – 336 h:

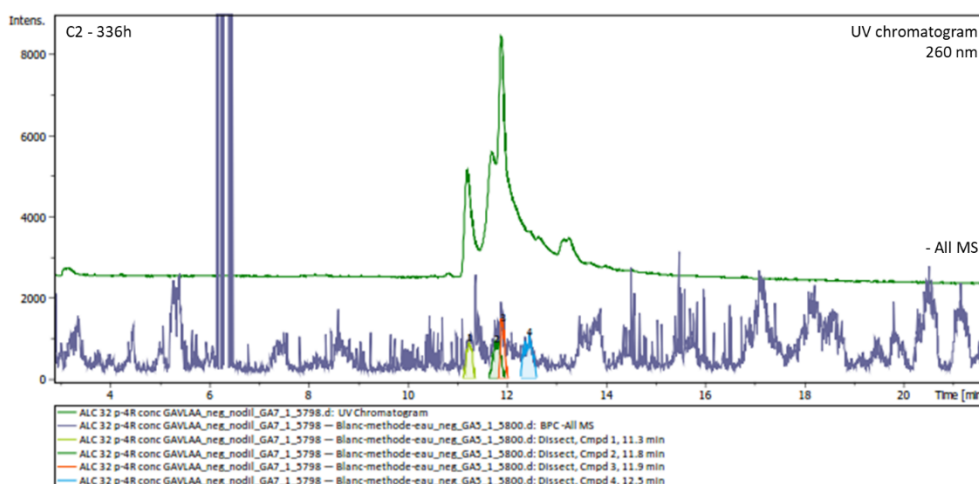

### Composé 1 - Tr = 11.3 min

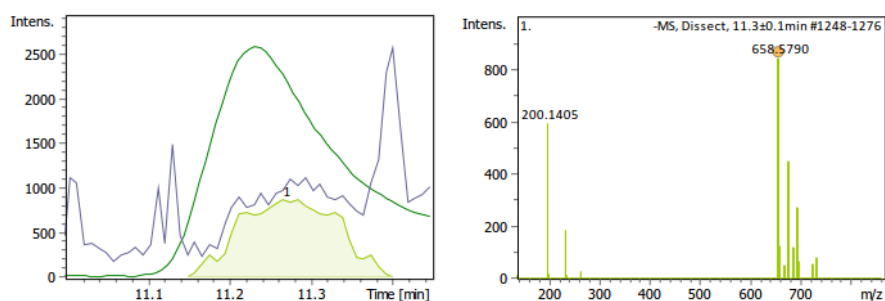

| Meas. m/z | Ion Formula    | Sum Formula    | m/z      | err [ppm] | mSigma | Adduct | z  |
|-----------|----------------|----------------|----------|-----------|--------|--------|----|
| 658.579   | C38H47N15O30P4 | C38H49N15O30P4 | 658.5787 | -0.4      | 22.7   | M-H    | 2- |

→ Le spectre de masse met en évidence la présence des adduits correspondant à un produit dont la formule brute est la suivante :  $C_{38}H_{49}N_{15}O_{30}P_4$ .

## H<sub>2</sub>N-pUGGU

### Composé 2 - Tr = 11.8 min

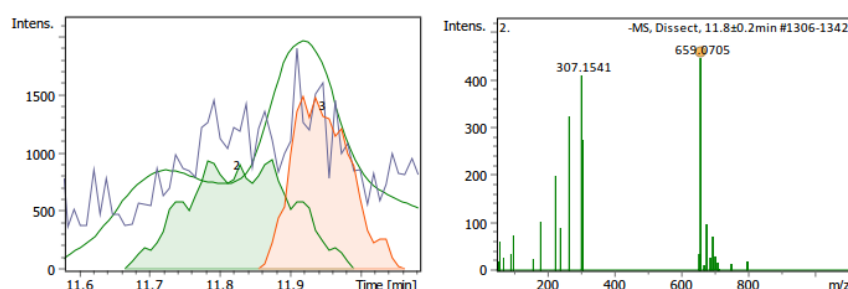

| Meas. m/z | Ion Formula    | Sum Formula    | m/z      | err [ppm] | mSigma | Adduct | z  |
|-----------|----------------|----------------|----------|-----------|--------|--------|----|
| 659.0705  | C38H46N14O31P4 | C38H48N14O31P4 | 659.0707 | 0.4       | 121.9  | M-H    | 2- |

→ Le spectre de masse met en évidence la présence des adduits correspondant à un produit dont la formule brute est la suivante :  $C_{38}H_{48}N_{14}O_{31}P_4$ .

## pUGGU

■ Composé 3 - Tr = 11.9 min

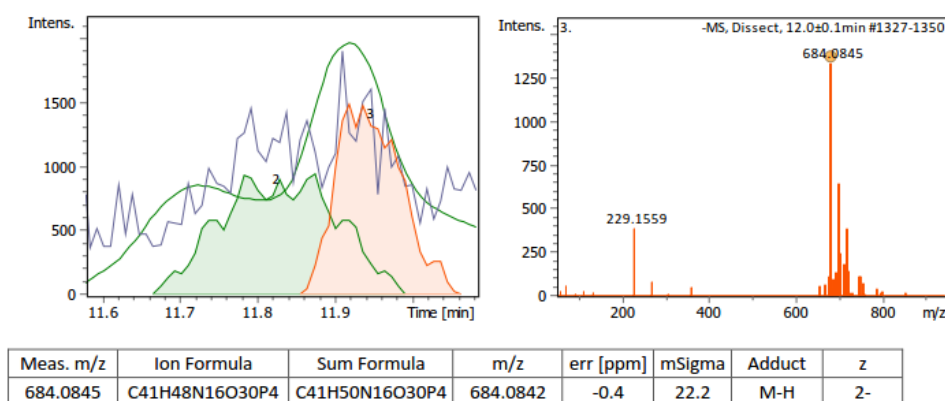

→ Le spectre de masse met en évidence la présence des adduits correspondant à un produit dont la formule brute est la suivante :  $C_{41}H_{50}N_{16}O_{30}P_4$ .

Im-pUGGU

■ Composé 4 - Tr = 12.5 min

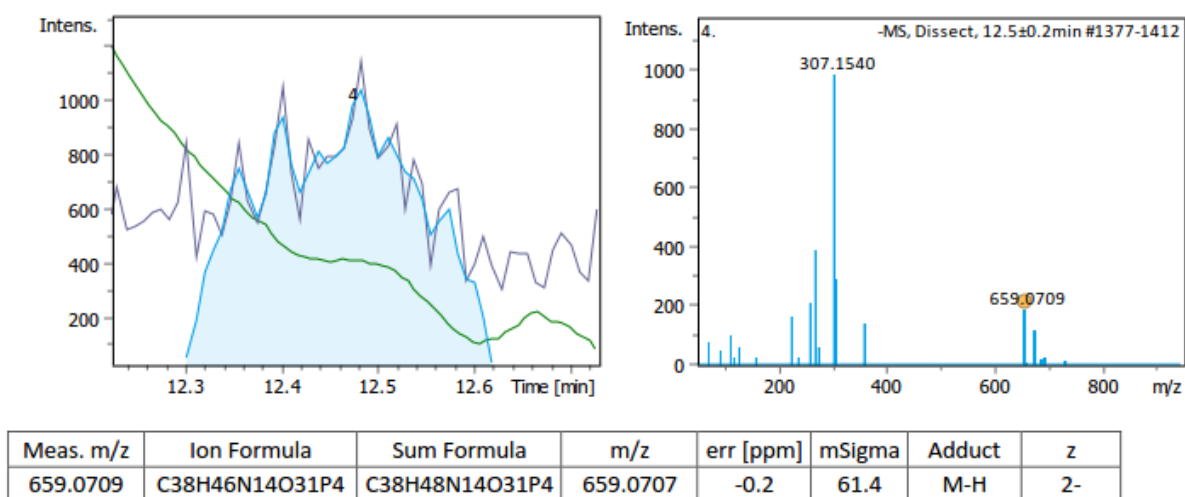

→ Le spectre de masse met en évidence la présence des adduits correspondant à un produit dont la formule brute est la suivante :  $C_{38}H_{48}N_{14}O_{31}P_4$ .

H<sub>2</sub>N-pUGGU

Figure S28. UV (260 nm) and LC-MS chromatograms (negative ion mode), UV peaks, MS peaks and associated compounds obtained for C2 experiment after reaction with GAVLAA NCA (336 h).

#### 4) Supplementary information to: Ligation attempts between activated complementary oligonucleotides in prebiotic conditions compatible with the presence of lipidic giant vesicles

The prebiotic ligation reaction investigated corresponded to the formation of longer oligonucleotides after the activation of the terminal phosphate of oligonucleotides into 2',3'-cyclophosphate with the action of EDC. The additional step involving the formation of another intermediate after addition of the nucleophilic catalyst was omitted for simplicity (Scheme S4).

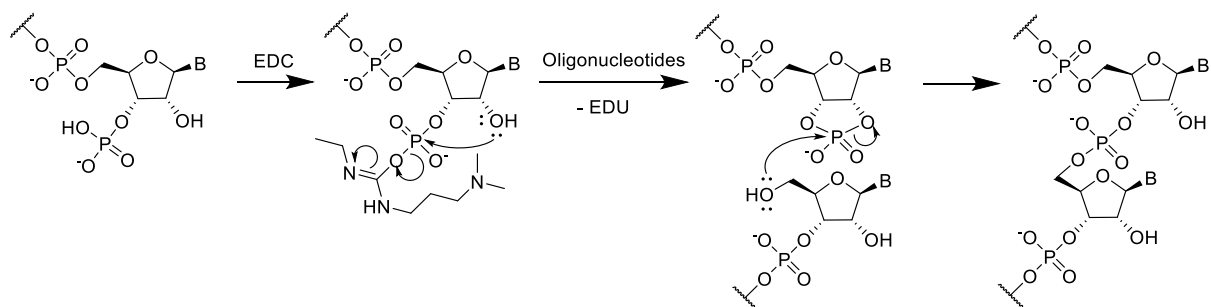

Scheme S4. The formation of oligonucleotides by ligation was studied in the case of activated 2',3'-cyclophosphates oligonucleotides. Such intermediate should be obtained after activation of the 3'-phosphate with a coupling agent such as EDC. B stands for nucleobase and EDU for *N*-ethyl-*N'*-dimethyl-ylaminopropylurea. Only the natural 3',5'-dinucleotide linkage is shown, but the 2',5'-linkage can also be formed.

#### 4)1) Oligonucleotides production and analyses

Similarly to the oligonucleotide pUGGU, all the oligonucleotides were generated using solid-support synthesis with the same adapted program and quantities (see 3)1)). The same deprotection steps were also performed without the addition of Et<sub>3</sub>N-3HF for oligonucleotides containing only DNA nucleotides (see 3)1)). For the HPLC purification, the same protocols were applied. The only difference was the gradient used that depended on the oligonucleotide (see Fig. S29 for the gradient used with each oligonucleotide). The yields of the oligonucleotides were calculated using the optical density at 260 nm with the absorbance  $A_{260}$  of the pure samples obtained after HPLC separation and the online service OligoCalc™ for each oligonucleotide. Hereunder are the chemical analyses of all the oligonucleotides synthesized (Fig. S29).

4Dp oligonucleotide:

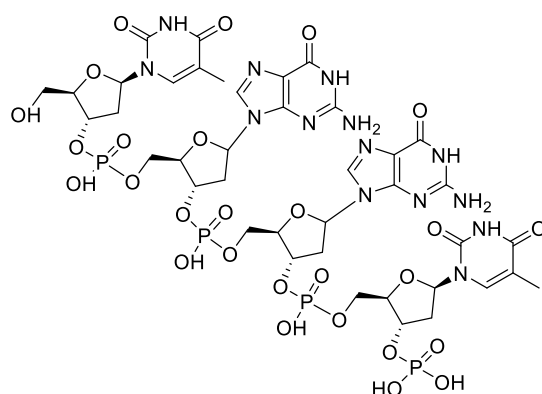

Chemical Formula: C<sub>40</sub>H<sub>52</sub>N<sub>14</sub>O<sub>27</sub>P<sub>4</sub>  
Molecular Weight: 1284,82

4Dp MS analysis and UV analytical HPLC chromatogram (260 nm):



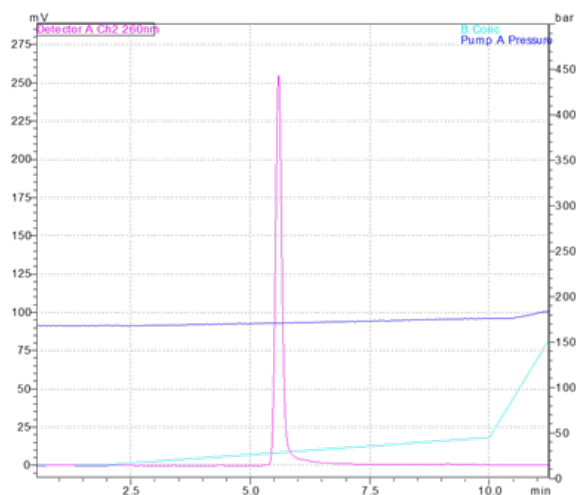

## Display Report

### Analysis Info

Analysis Name D:\Data\Data\2021\2021\_09\Impact2\_2100902\_01\_AL B 100 4D-p 1.d  
 Method Tune\_pos\_Standard.m  
 Sample Name  
 Comment

Acquisition Date 9/2/2021 1:45:11 PM  
 Operator Demo User  
 Instrument impact II 1825265.10081

### Acquisition Parameter

|             |          |                      |          |                  |           |
|-------------|----------|----------------------|----------|------------------|-----------|
| Source Type | ESI      | Ion Polarity         | Negative | Set Nebulizer    | 0.3 Bar   |
| Focus       | Active   | Set Capillary        | 4500 V   | Set Dry Heater   | 200 °C    |
| Scan Begin  | 50 m/z   | Set End Plate Offset | -500 V   | Set Dry Gas      | 4.0 l/min |
| Scan End    | 2500 m/z | Set Charging Voltage | 2000 V   | Set Divert Valve | Source    |
|             |          | Set Corona           | 0 nA     | Set APCI Heater  | 0 °C      |

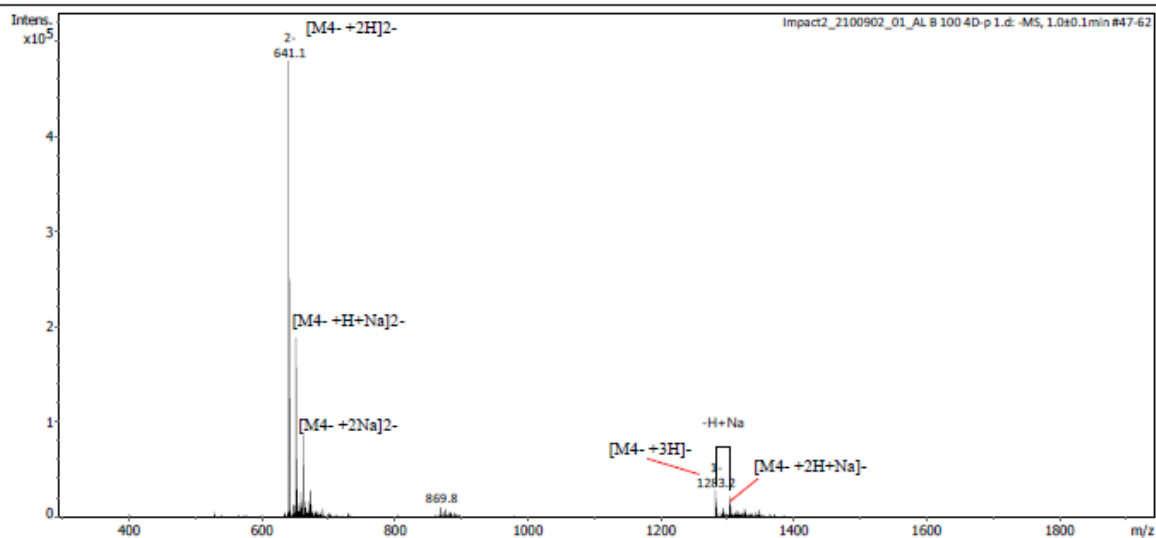

Impact2\_2100902\_01\_AL B 100 4D-p 1.d

Bruker Compass DataAnalysis 5.2

printed: 9/2/2021 1:50:35 PM

by: demo

Page 1 of 1

p4D oligonucleotide:

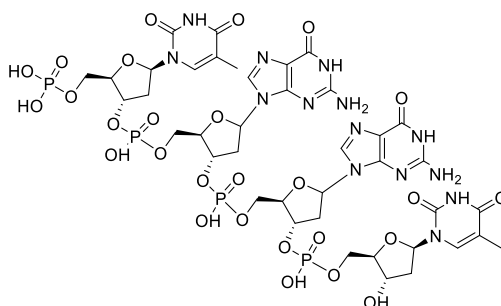

Chemical Formula:  $C_{40}H_{52}N_{14}O_{27}P_4$   
 Molecular Weight: 1284.82

p4D MS analysis and UV analytical HPLC chromatogram (260 nm):

### Display Report

#### Analysis Info

Analysis Name D:\Data\Data\2021\2021\_11\Impact2\_211116\_07\_ALB 124 p-4D 1.d  
Method Tune\_pos\_Standard.m  
Sample Name  
Comment

Acquisition Date 11/16/2021 4:50:43 PM

Operator Demo User  
Instrument impact II 1825265.10081

#### Acquisition Parameter

|             |          |                      |          |                  |           |
|-------------|----------|----------------------|----------|------------------|-----------|
| Source Type | ESI      | Ion Polarity         | Negative | Set Nebulizer    | 0.3 Bar   |
| Focus       | Active   | Set Capillary        | 4500 V   | Set Dry Heater   | 200 °C    |
| Scan Begin  | 50 m/z   | Set End Plate Offset | -500 V   | Set Dry Gas      | 4.0 l/min |
| Scan End    | 3000 m/z | Set Charging Voltage | 2000 V   | Set Divert Valve | Source    |
|             |          | Set Corona           | 0 nA     | Set APCI Heater  | 0 °C      |

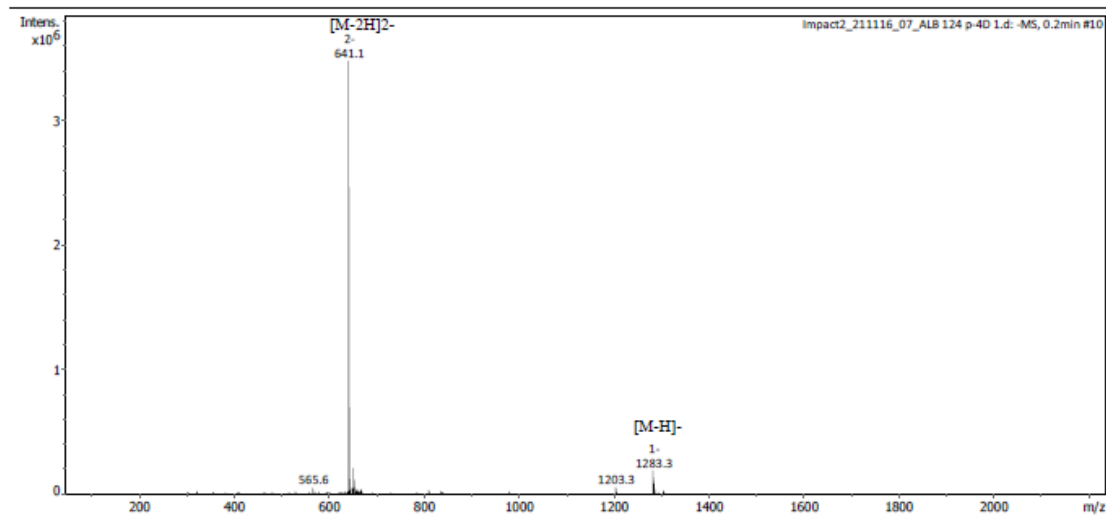

Impact2\_211116\_07\_ALB 124 p-4D 1.d

Bruker Compass DataAnalysis 5.2

printed: 11/16/2021 4:53:49 PM

by: demo

Page 1 of 1

Datafile Name:p-4D purity OD measures1.d  
Sample Name:p-4D purity OD measures

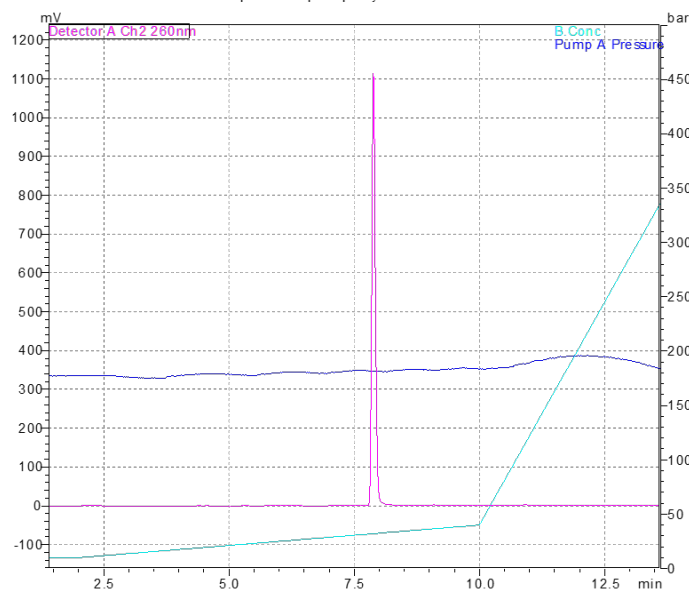

## 4Hp oligonucleotide:

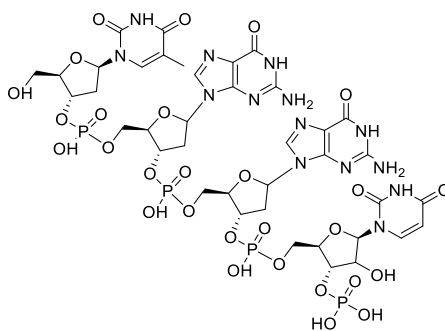

Chemical Formula:  $C_{39}H_{50}N_{14}O_{28}P_4$   
Molecular Weight: 1286,79

## 4Hp MS analysis and UV analytic HPLC chromatogram (260 nm):

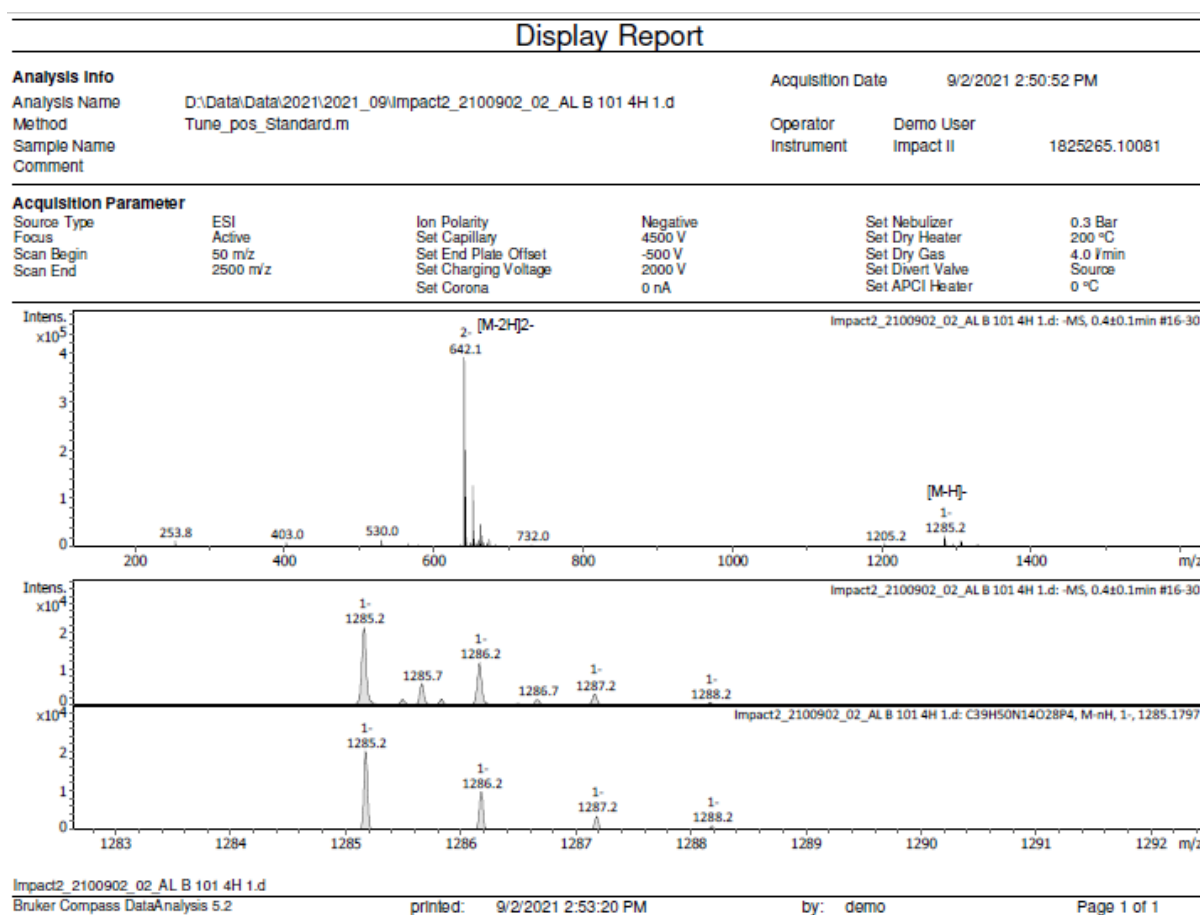

Impact2\_2100902\_02\_AL B 101 4H 1.d

Brucker Compass DataAnalysis 5.2

printed: 9/2/2021 2:53:20 PM

by: demo

Page 1 of 1

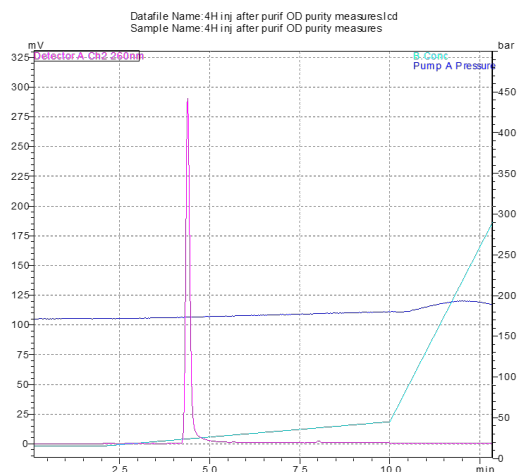

4Rp oligonucleotide:

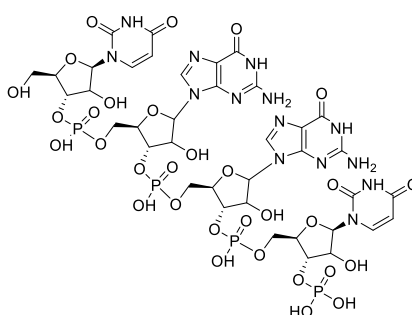

Chemical Formula:  $C_{38}H_{48}N_{14}O_{31}P_4$   
Molecular Weight: 1320,76

4Rp MS analysis and UV analytical HPLC chromatogram (260 nm):

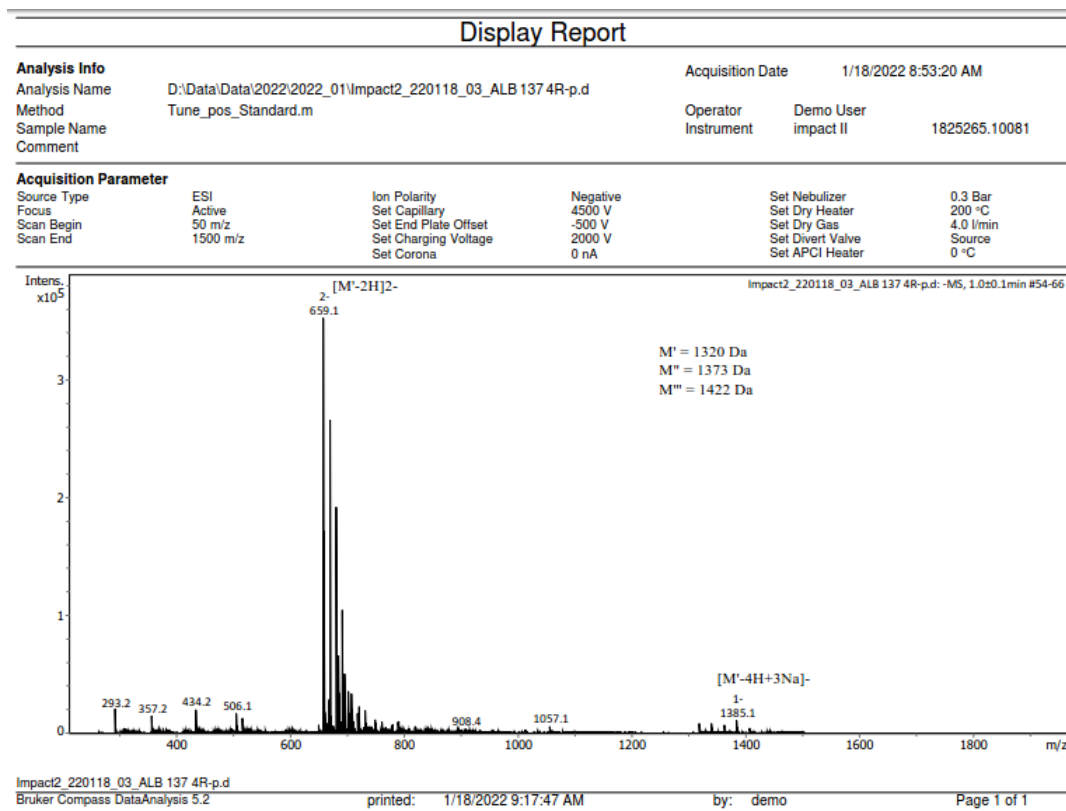

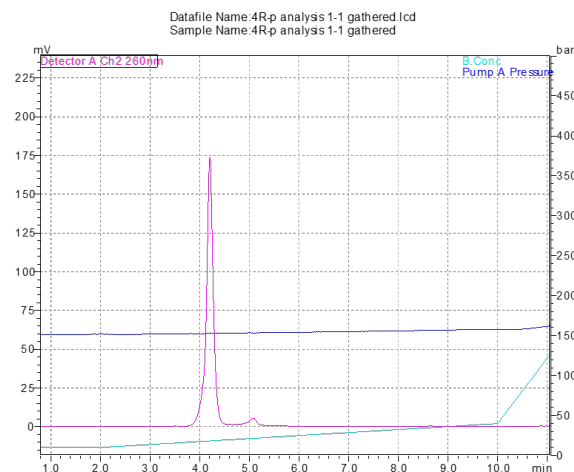

5Dp oligonucleotide:

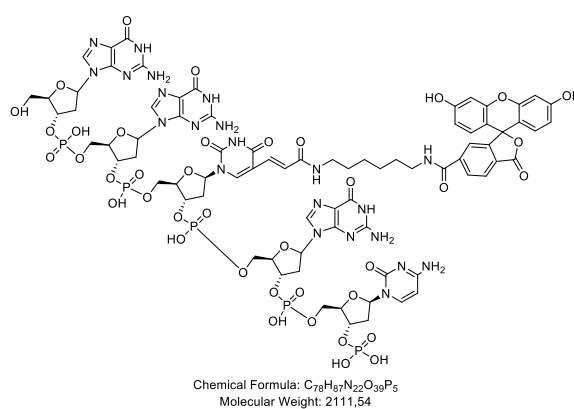

5Dp MS analysis, UV (260 nm) and fluorescence (490/510 nm) analytical HPLC chromatograms:

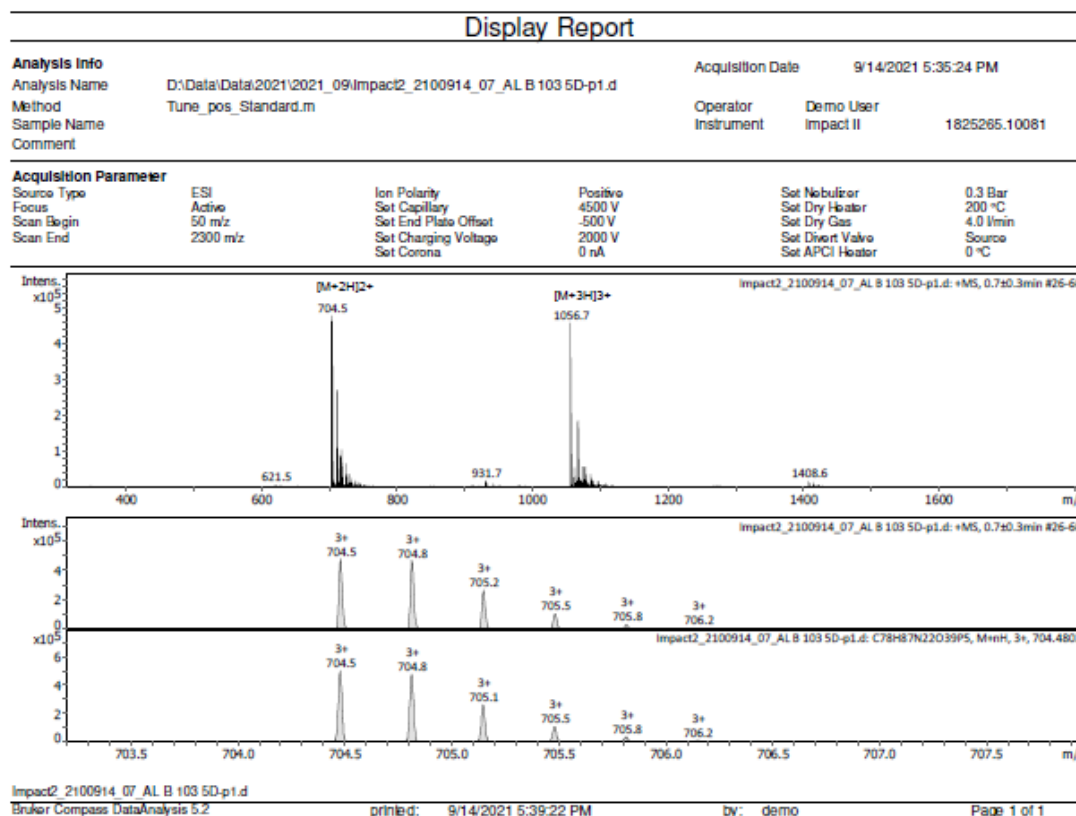

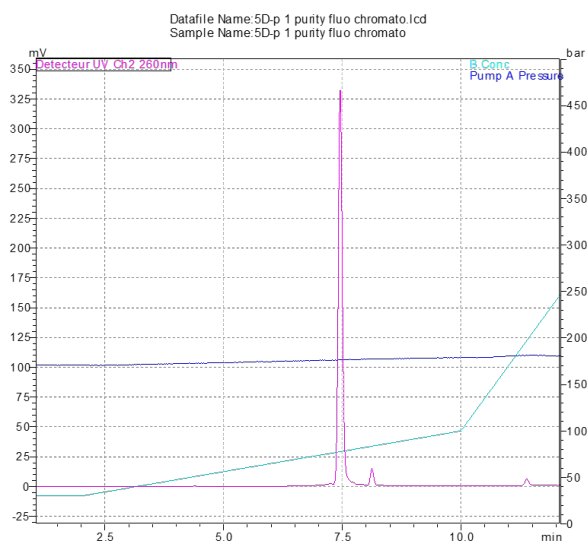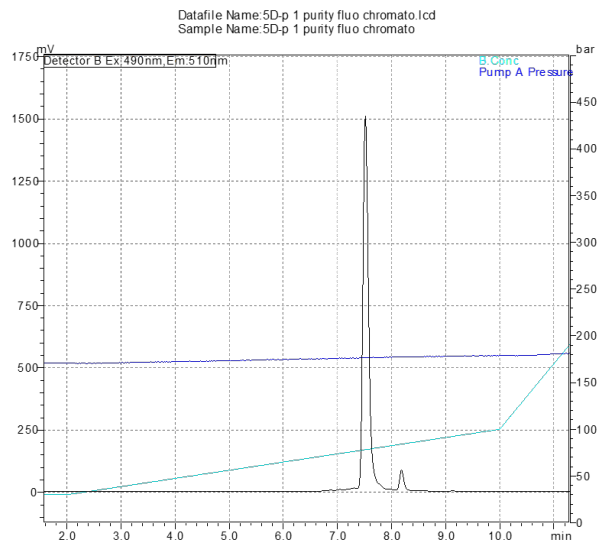

p5D oligonucleotide:

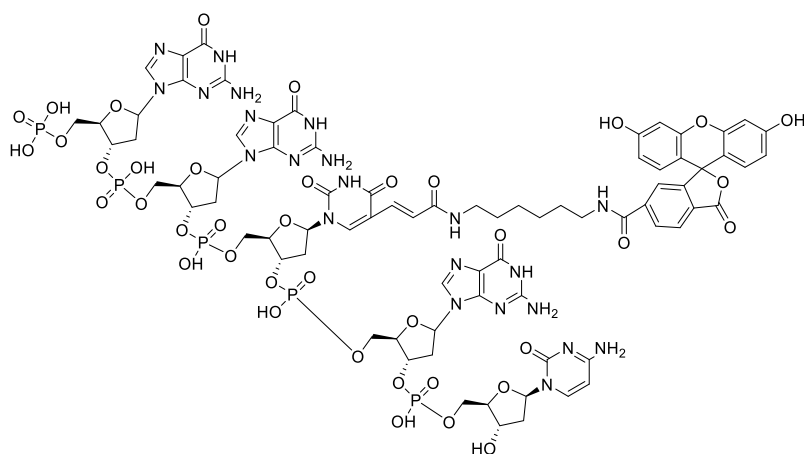

Chemical Formula:  $C_{78}H_{87}N_{22}O_{39}P_5$   
Molecular Weight: 2111.54

p5D MS analysis, UV (260 nm) and fluorescence (490/510 nm) analytical HPLC chromatograms:

### Display Report

#### Analysis Info

Analysis Name: D:\Data\Data\2021\2021\_11\Impact2\_211104\_06\_ALB 120 p-5D 1.d  
Method: Tune\_pos\_Standard.m  
Sample Name:  
Comment:

Acquisition Date: 11/4/2021 2:47:29 PM

Operator: Demo User  
Instrument: impact II  
1825265.10081

#### Acquisition Parameter

|             |          |                      |          |                  |           |
|-------------|----------|----------------------|----------|------------------|-----------|
| Source Type | ESI      | Ion Polarity         | Negative | Set Nebulizer    | 0.3 Bar   |
| Focus       | Active   | Set Capillary        | 4500 V   | Set Dry Heater   | 200 °C    |
| Scan Begin  | 50 m/z   | Set End Plate Offset | -500 V   | Set Dry Gas      | 4.0 l/min |
| Scan End    | 2500 m/z | Set Charging Voltage | 2000 V   | Set Divert Valve | Source    |
|             |          | Set Corona           | 0 nA     | Set APCI Heater  | 0 °C      |

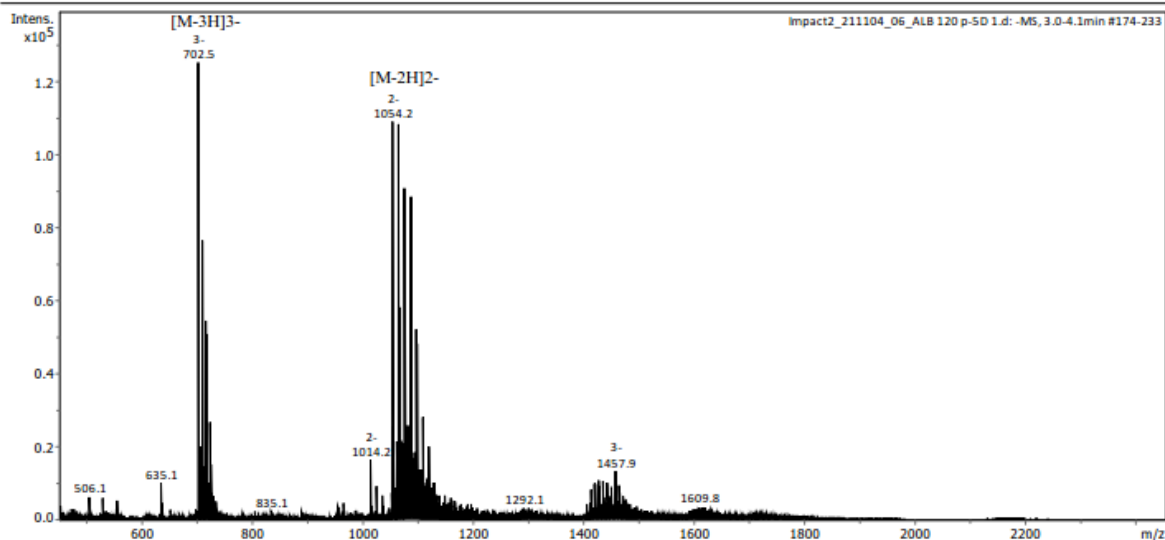

Impact2\_211104\_06\_ALB 120 p-5D 1.d  
Bruker Compass DataAnalysis 5.2

printed: 11/4/2021 2:54:22 PM

by: demo

Page 1 of 1

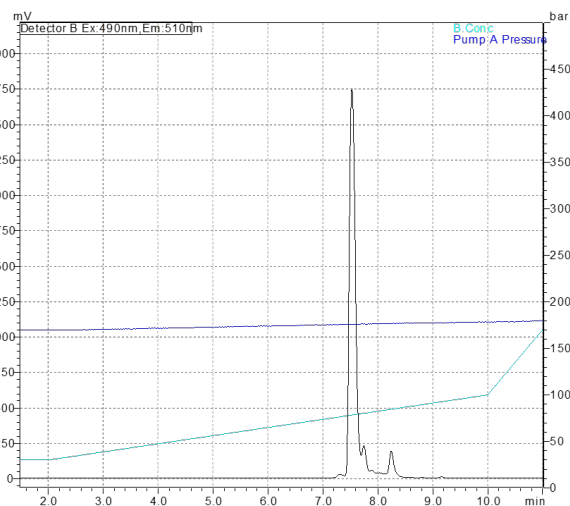[illegible]

Chemical Formula:  $C_{78}H_{87}N_{22}O_{40}P_5$   
Molecular Weight: 2127,54

The figure consists of two side-by-side chromatograms. The left chromatogram is titled 'Datafile Name: 5H 2-1 gathered.lcd' and 'Sample Name: 5H 2-1 gathered'. It has two y-axes: the left axis is 'mV' (ranging from -100 to 700) and the right axis is 'bar' (ranging from 0 to 450). The x-axis is 'min' (ranging from 2.0 to 9.0). There are three data series: 'Detector UV Ch2 260nm' (magenta line, showing a sharp peak at ~7.5 min), 'B Conc' (cyan line, showing a gradual increase), and 'Pump A Pressure' (blue line, showing a constant pressure around 150 bar). The right chromatogram is titled 'Datafile Name: 5H 2-1 gathered.lcd' and 'Sample Name: 5H 2-1 gathered'. It has two y-axes: the left axis is 'mV' (ranging from -100 to 700) and the right axis is 'bar' (ranging from 0 to 450). The x-axis is 'min' (ranging from 3.0 to 9.0). There are three data series: 'B Ex:490nm,Em:510nm' (black line, showing a sharp peak at ~7.5 min), 'B Conc' (cyan line, showing a gradual increase), and 'Pump A Pressure' (blue line, showing a constant pressure around 150 bar).



## Display Report

### Analysis Info

Analysis Name D:\Data\Data\2021\2021\_12\Impact2\_211214\_02\_ALB 133 5H 2.d  
 Method Tune\_pos\_Standard.m  
 Sample Name  
 Comment

Acquisition Date 12/14/2021 7:50:45 AM

Operator Demo User  
 Instrument Impact II 1825265.10081

### Acquisition Parameter

|             |          |                      |          |                  |           |
|-------------|----------|----------------------|----------|------------------|-----------|
| Source Type | ESI      | Ion Polarity         | Negative | Set Nebulizer    | 0.3 Bar   |
| Focus       | Active   | Set Capillary        | 4500 V   | Set Dry Heater   | 200 °C    |
| Scan Begin  | 100 m/z  | Set End Plate Offset | -500 V   | Set Dry Gas      | 4.0 l/min |
| Scan End    | 3000 m/z | Set Charging Voltage | 2000 V   | Set Divert Valve | Source    |
|             |          | Set Corona           | 0 nA     | Set APCI Heater  | 0 °C      |

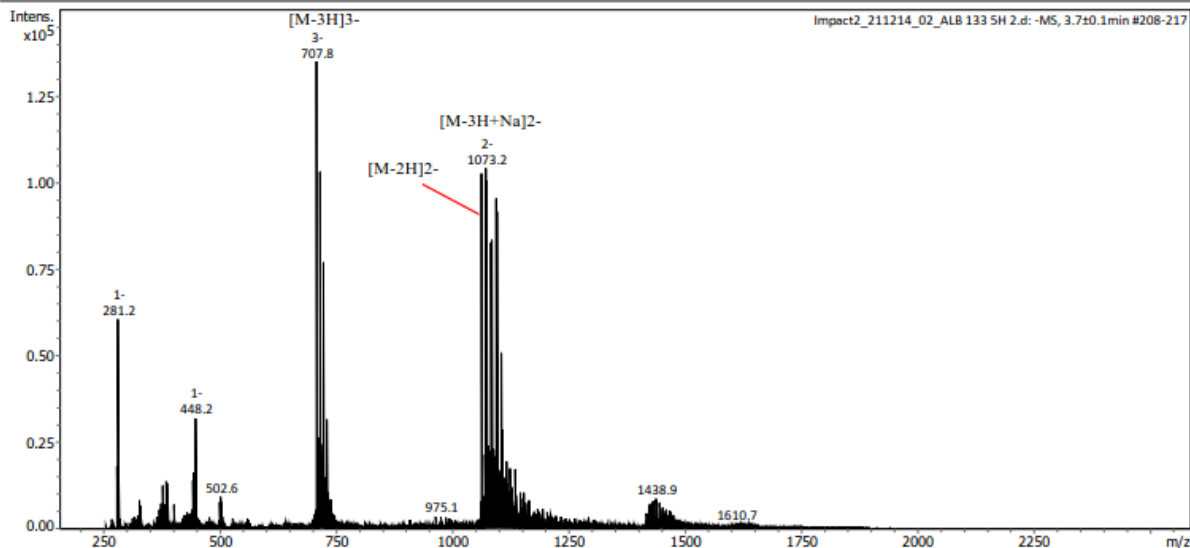

Impact2\_211214\_02\_ALB 133 5H 2.d  
 Bruker Compass DataAnalysis 5.2

printed: 12/14/2021 8:11:18 AM

by: demo

Page 1 of 1

5Rp oligonucleotide:

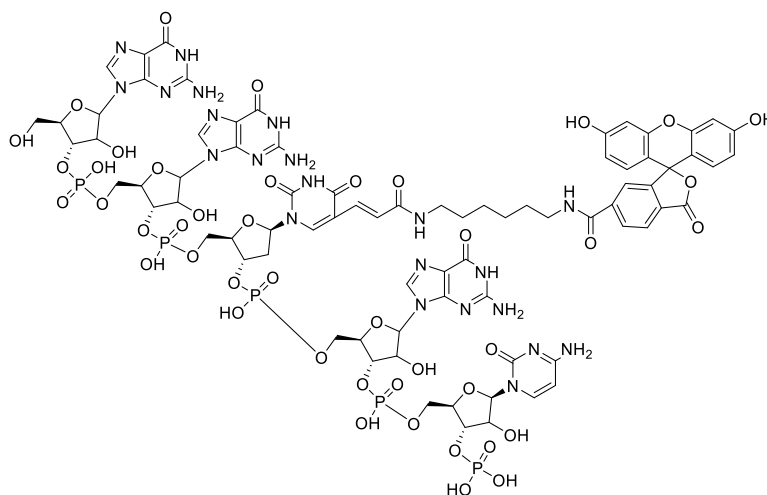

Chemical Formula:  $C_{78}H_{87}N_{22}O_{43}P_5$   
 Molecular Weight: 2175.53

5Rp MS analysis, UV (260 nm) and fluorescence (490/510 nm) analytical HPLC chromatograms:

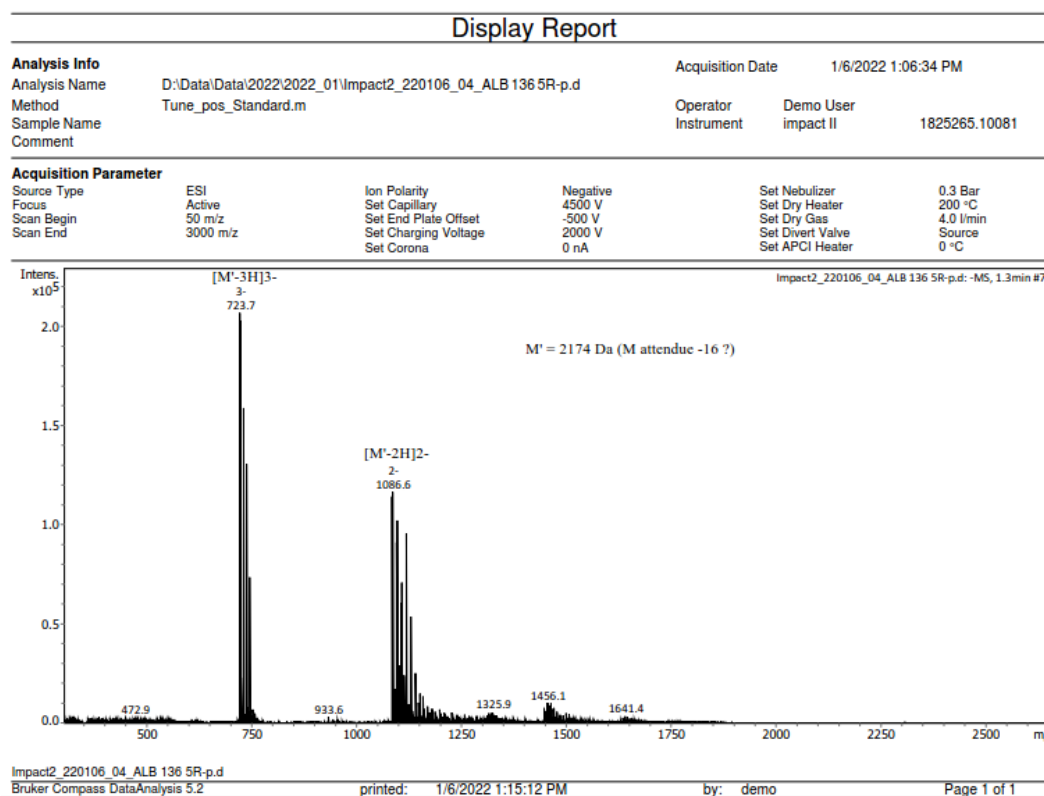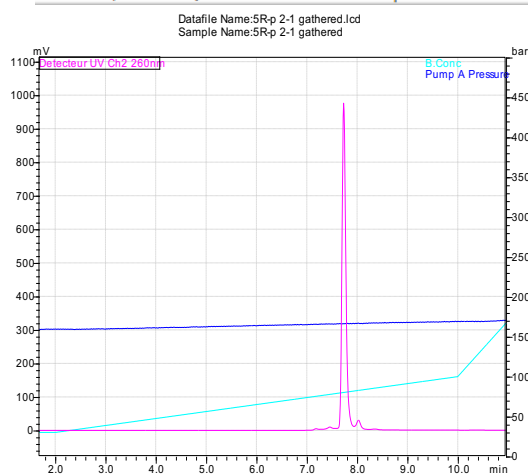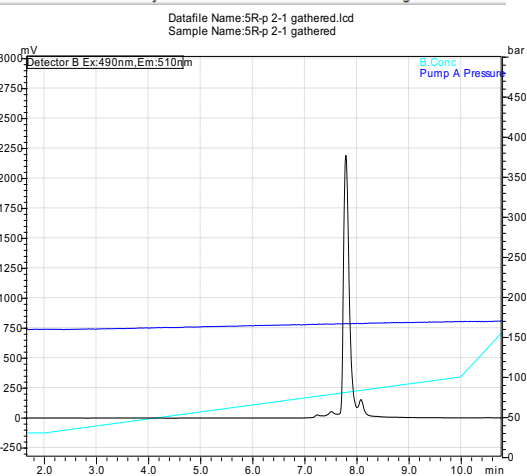

p5R oligonucleotide:

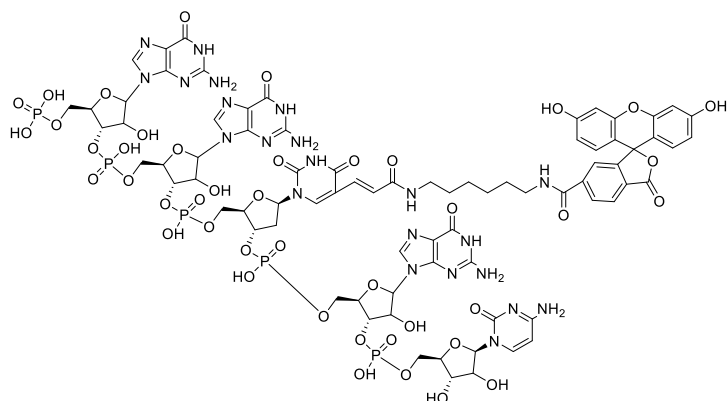

Chemical Formula:  $C_{78}H_{87}N_{22}O_{43}P_5$   
Molecular Weight: 2175.53

p5R MS analysis, UV (260 nm) and fluorescence (490/510 nm) analytical HPLC chromatograms:

## Display Report

|                       |                                                              |                      |                  |                  |                      |               |
|-----------------------|--------------------------------------------------------------|----------------------|------------------|------------------|----------------------|---------------|
| Analysis Info         |                                                              |                      | Acquisition Date |                  | 1/25/2022 8:20:43 AM |               |
| Analysis Name         | D:\Data\Data\2022\2022_01\Impact2_220125_01_ALB 139 p-5R 2.d |                      |                  |                  |                      |               |
| Method                | Tune_pos_Standard.m                                          |                      |                  | Operator         | Demo User            |               |
| Sample Name           |                                                              |                      |                  | Instrument       | impact II            | 1825265.10081 |
| Comment               |                                                              |                      |                  |                  |                      |               |
| Acquisition Parameter |                                                              |                      |                  |                  |                      |               |
| Source Type           | ESI                                                          | Ion Polarity         | Negative         | Set Nebulizer    | 0.3 Bar              |               |
| Focus                 | Active                                                       | Set Capillary        | 4500 V           | Set Dry Heater   | 200 °C               |               |
| Scan Begin            | 50 m/z                                                       | Set End Plate Offset | -500 V           | Set Dry Gas      | 4.0 l/min            |               |
| Scan End              | 2500 m/z                                                     | Set Charging Voltage | 2000 V           | Set Divert Valve | Source               |               |
|                       |                                                              | Set Corona           | 0 nA             | Set APCI Heater  | 0 °C                 |               |

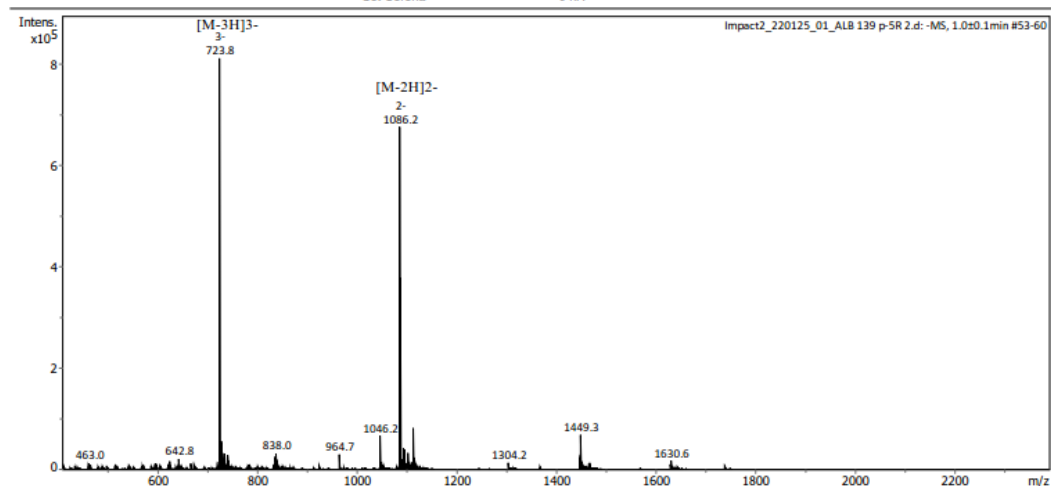

Impact2\_220125\_01\_ALB 139 p-5R 2.d

Bruker Compass DataAnalysis 5.2

printed: 1/25/2022 8:33:36 AM

by: demo

Page 1 of 1

Datafile Name:p-5R 2-1 gathered.lcd  
Sample Name:p-5R 2-1 gathered

Datafile Name:p-5R 2-1 gathered.lcd  
Sample Name:p-5R 2-1 gathered

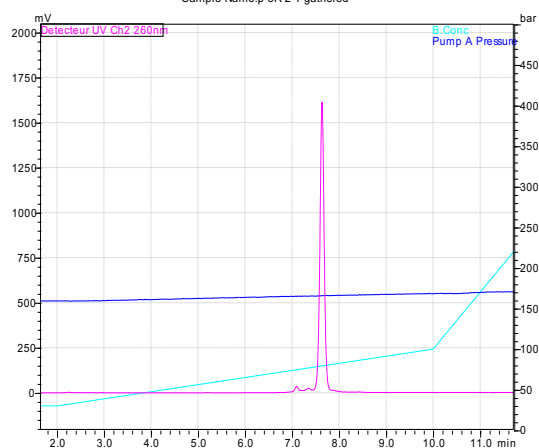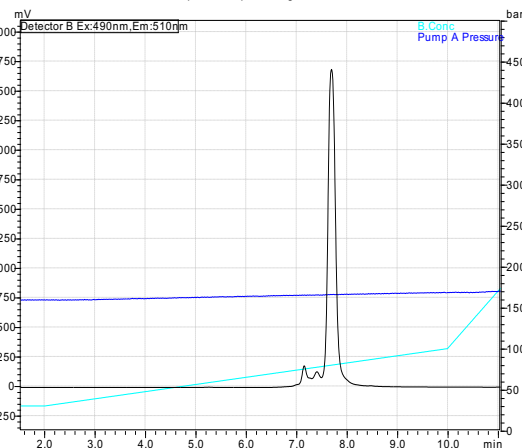

9D oligonucleotide:

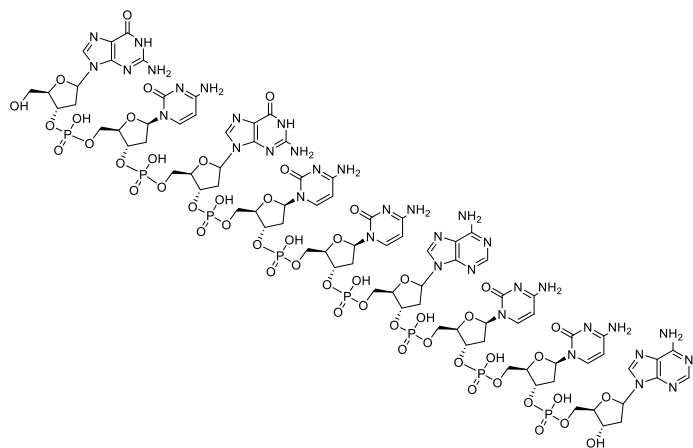

Chemical Formula: C<sub>85</sub>H<sub>109</sub>N<sub>35</sub>O<sub>50</sub>P<sub>8</sub>  
Molecular Weight: 2668.79

9D MS analysis and UV analytic HPLC chromatogram (260 nm):

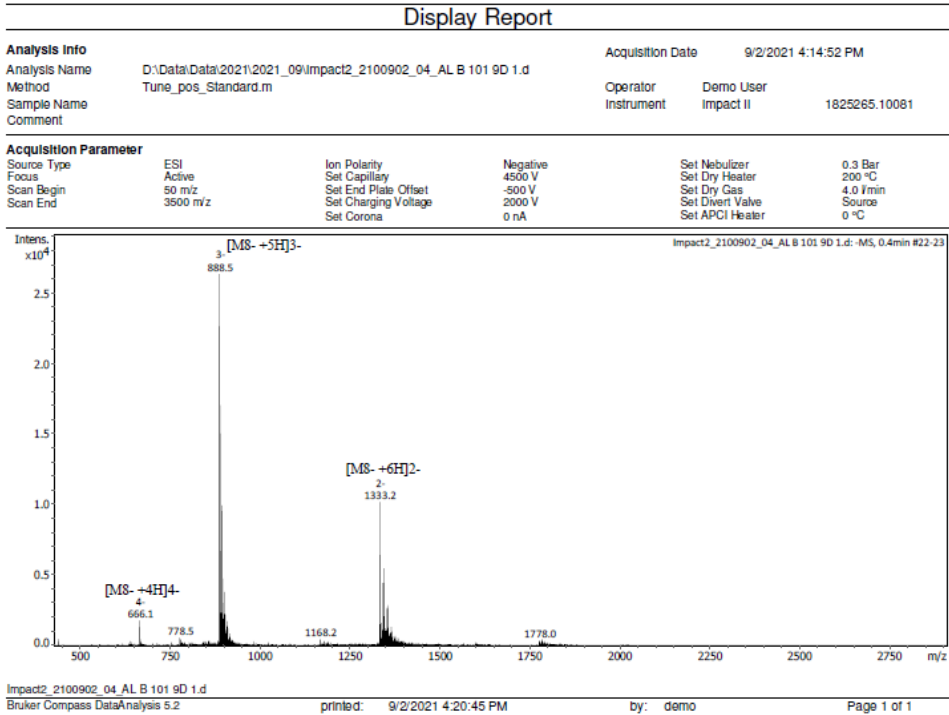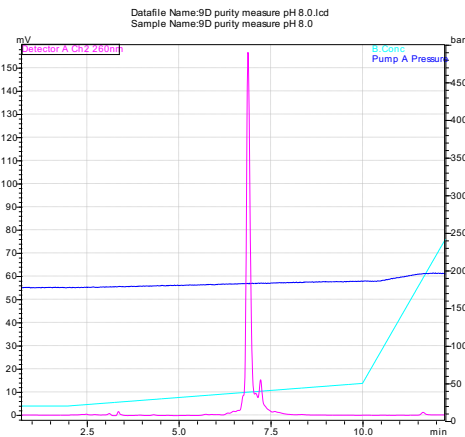

9R oligonucleotide:

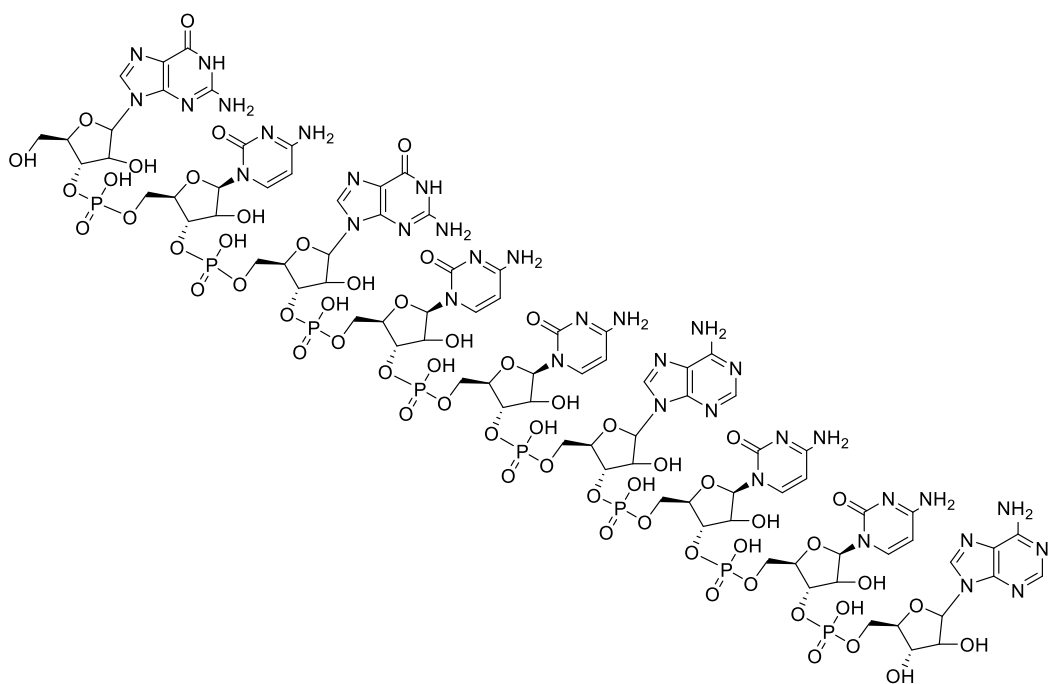

Chemical Formula:  $C_{85}H_{109}N_{35}O_{59}P_8$   
Molecular Weight: 2812,78

9R MS analysis and UV analytic HPLC chromatogram (260 nm):

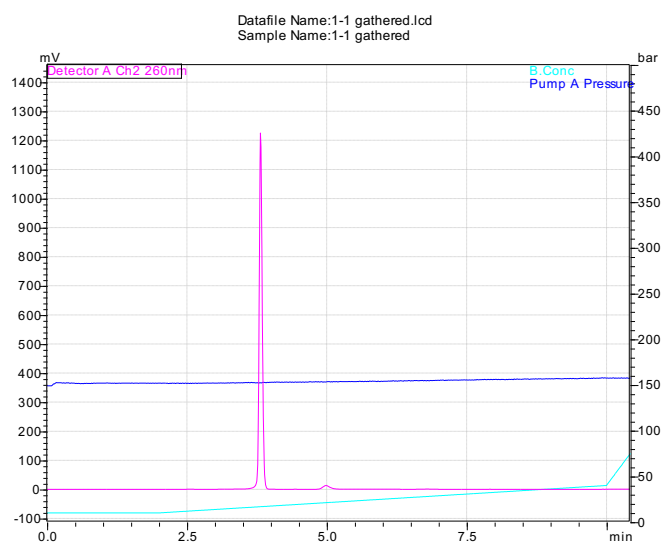

## Display Report

|                      |                                                          |                  |                      |               |
|----------------------|----------------------------------------------------------|------------------|----------------------|---------------|
| <b>Analysis Info</b> |                                                          | Acquisition Date | 1/24/2022 3:48:45 PM |               |
| Analysis Name        | D:\Data\Data\2022\2022_01\Impact2_220124_04_ALB 139 9R.d |                  | Operator             | Demo User     |
| Method               | Tune_pos_Standard.m                                      |                  | Instrument           | impact II     |
| Sample Name          |                                                          |                  |                      | 1825265.10081 |
| Comment              |                                                          |                  |                      |               |

|                              |          |                      |          |                  |           |
|------------------------------|----------|----------------------|----------|------------------|-----------|
| <b>Acquisition Parameter</b> |          |                      |          |                  |           |
| Source Type                  | ESI      | Ion Polarity         | Negative | Set Nebulizer    | 0.3 Bar   |
| Focus                        | Active   | Set Capillary        | 4500 V   | Set Dry Heater   | 200 °C    |
| Scan Begin                   | 50 m/z   | Set End Plate Offset | -500 V   | Set Dry Gas      | 4.0 l/min |
| Scan End                     | 3000 m/z | Set Charging Voltage | 2000 V   | Set Divert Valve | Source    |
|                              |          | Set Corona           | 0 nA     | Set APCI Heater  | 0 °C      |

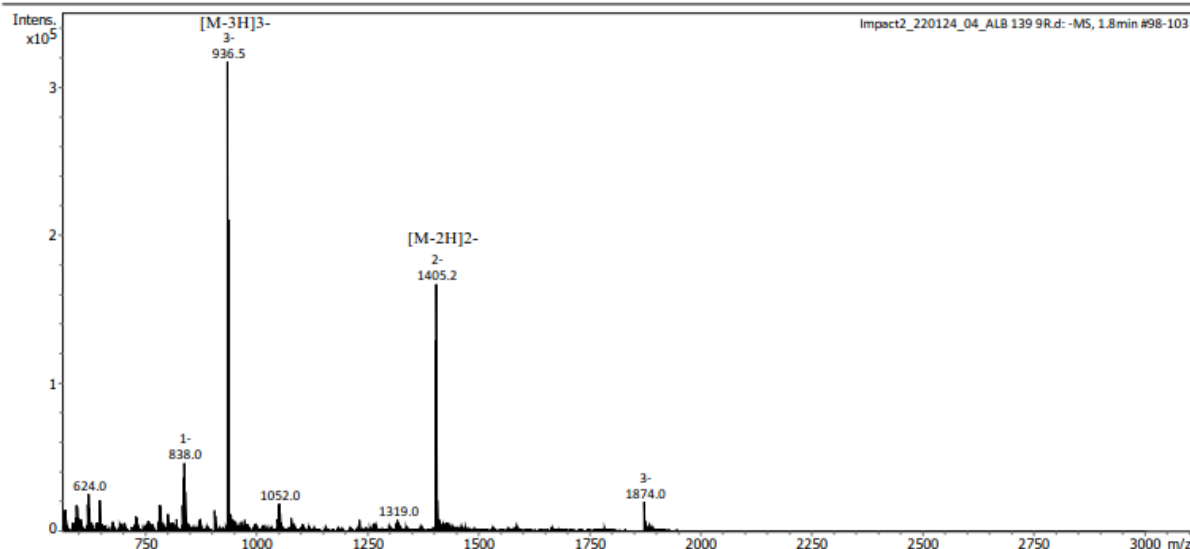

Impact2\_220124\_04\_ALB 139 9R.d  
 Bruker Compass DataAnalysis 5.2  
 printed: 1/24/2022 3:53:31 PM by: demo Page 1 of 1

| Sequence           | Gradient used       | Purity (%) | Concentration determination (1 mL of solution with an absorbance of 1 at 260 nm contains [] μM of oligonucleotides) | Yield (%) | m/z    | m/z found |
|--------------------|---------------------|------------|---------------------------------------------------------------------------------------------------------------------|-----------|--------|-----------|
| 4Dp<br>d(TGGT)-P   | 3 to 9% B in 8 min  | 99.8       | 24.498                                                                                                              | 8.7       | 1284.8 | 1284.2    |
| p4D<br>P-d(TGGT)   | 3 to 9% B in 8 min  | 99.6       | 24.498                                                                                                              | 39.5      | 1284.8 | 1284.2    |
| 4Hp<br>d(TGG)U-P   | 3 to 9% B in 8 min  | 99.6       | 23.685                                                                                                              | 11.4      | 1286.8 | 1286.2    |
| 4Rp<br>UGGU-P      | 2 to 8% B in 8 min  | 97.1       | 21.097                                                                                                              | 12.4      | 1320.8 | 1320.2    |
| p4R<br>P-UGGU      | 2 to 8% B in 8 min  | 96.2       | 21.097                                                                                                              | 38.9      | 1320.8 | 1320.2    |
| 5Dp<br>d(GGfTGC)-P | 6 to 20% B in 8 min | 95.4       | 15.342                                                                                                              | 8.8       | 2111.5 | 2111.5    |
| p5D<br>P-d(GGfTGC) | 6 to 20% B in 8 min | 95.3       | 15.342                                                                                                              | 25.1      | 2111.5 | 2110.5    |
| 5Hp<br>d(GGfTGC)-P | 6 to 20% B in 8 min | 98.7       | 15.342                                                                                                              | 19.7      | 2127.5 | 2126.4    |
| 5Rp<br>GGd(fT)GC-P | 6 to 20% B in 8 min | 97.3       | 13.661                                                                                                              | 21.1      | 2175.5 | 2174.2    |
| p5R<br>P-GGd(fT)GC | 6 to 20% B in 8 min | 98.2       | 13.661                                                                                                              | 28.8      | 2175.5 | 2174.4    |
| 9D<br>d(GCGCCACCA) | 5 to 11% B in 8 min | 96.5       | 11.152                                                                                                              | 2.2       | 2668.8 | 2668.5    |
| 9R<br>GCGCCACCA    | 4 to 10% B in 8 min | 97.5       | 9.69                                                                                                                | 6.2       | 2812.8 | 2812.5    |

Figure S29. For each oligonucleotide, the MS analysis (negative ion mode), the UV chromatogram (260 nm) (and the fluorescence chromatogram (490/510 nm) for 5-mers only) are displayed. As a summary, the table gives for each sequence, the HPLC gradient used for the separation, the purity (calculated with the UV chromatogram displayed), the micromolar concentration of an oligonucleotide solution in 1 mL to have an absorption  $A_{260} = 1.000$  through 1 cm path length (calculated with OligoCalc™), the yield calculated from the measured  $A_{260}$ , the  $m/z$  ratio of the oligonucleotide and the  $m/z$  ratio of the product found by MS analysis, both for  $z = -1$  (mono-anion). Fluorescent thymidylate = fT.

#### 4)2) Templated ligation attempts performed in two steps and vesicle production in the presence of EDC and sulfo-NHS

For the first attempts (from D1 to D4 experiments), the templated ligations were performed through two separate steps:

Cyclisation step: 10 equivalents of EDC (1 mM) were added to 1 equivalent (100  $\mu$ M) of the oligonucleotide able to form cyclic phosphate (4-mer alone or 4-mer + 5-mer) in 1 mL [4]. When both 4-mer and 5-mer were used, a 9-mer (0.4 (D1 experiment) or 0.2 equivalents (D2, D3 and D4 experiments)) was also added to allow the templated ligation to occur. The pH was adjusted to 5.5 adding 100 mM HCl and the cyclisation reaction was left for 4 h at room temperature. After that, 200  $\mu$ L were sampled and frozen at  $-80^{\circ}\text{C}$  for further analysis. For the cyclisation test performed on 4Rp alone the experiment was stopped here.

Reaction step: The pH value was brought to 6.0 and the sample was left for 64 h at  $5^{\circ}\text{C}$  for the ligation attempts. After that, 200  $\mu$ L were sampled and frozen at  $-80^{\circ}\text{C}$  for further analyses.

Several modifications were brought depending on the experiments:

- In the D2 experiment, several incubations at  $5^{\circ}\text{C}$  were performed, separated by 30 min at  $60^{\circ}\text{C}$  under argon flow in order to evaporate the solvent and to concentrate twice the sample (between each incubation).
- In order to avoid the formation of the of EDC-derivative of the fluorescein tag on the 5-mers, 1.1 equivalent (1.1 mM) sulfo-NHS was added at the beginning of the reaction (D3) or 1 equivalent (1 mM) was added after the cyclization step (D4).
- In order to favour the hybridisation between the 9-mer and the other oligonucleotides, 1.0 M NaCl was added after the first incubation (D3) or 100 mM were used from the start of the experiment (D4).

The same HPLC method was used for all the following LC-MS analyses (4)2) and 4)3)). A *Luna Omega Polar™* C18 column (150×3.0 mm, 5  $\mu$ m, *Phenomenex®*) was used. The oligonucleotides were separated at 0.6 mL/min using a binary eluant gradient composed of A) 5 mM  $\text{NH}_4\text{OAc}$  pH 8.0 and B)  $\text{CH}_3\text{CN}/\text{A}$  95:5 from 1 to 21 % B in 20 min.

As a test, a cyclisation experiment was performed on 4Rp alone (only the cyclisation step was done). The result was analysed using LC-MS (Fig. S30).

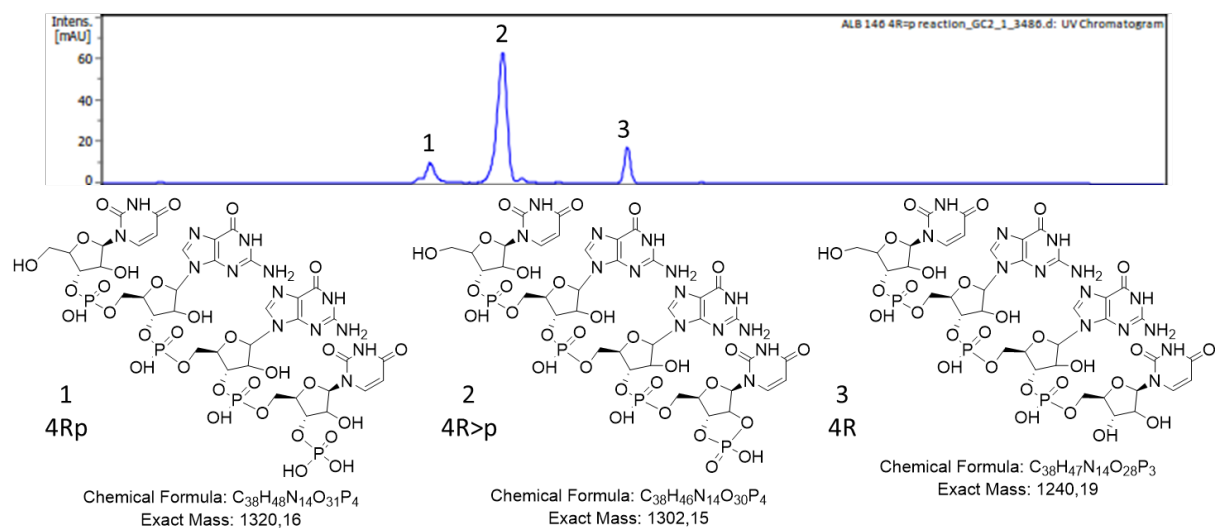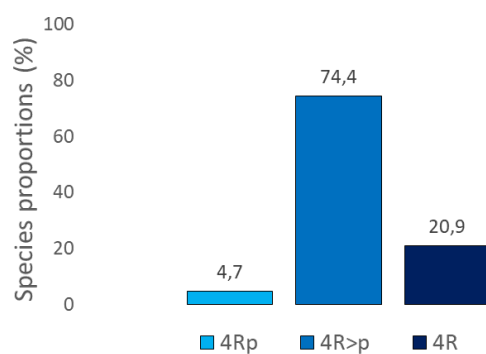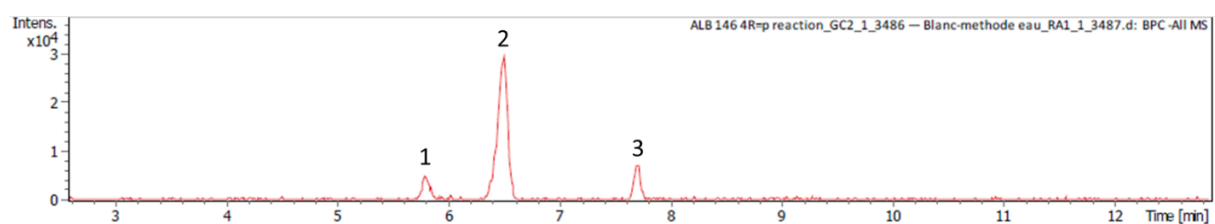

Composé 1 - Tr = 5.8 min

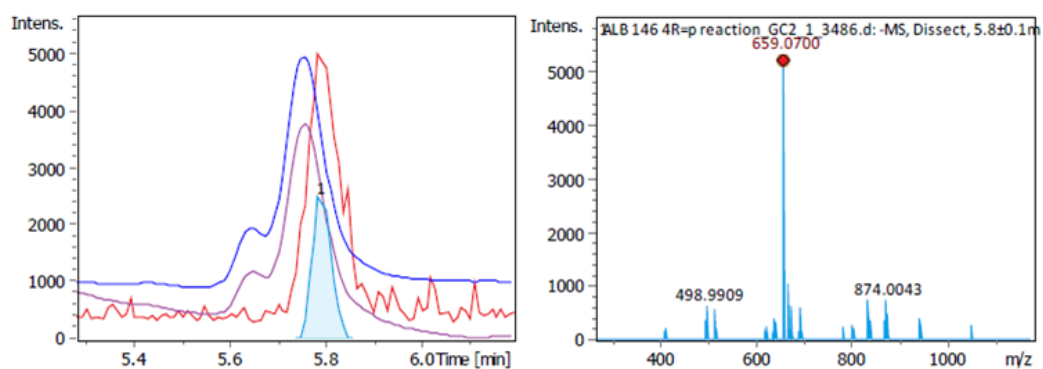

| Meas. m/z | Ion Formula    | Sum Formula    | m/z      | err [ppm] | mSigma | Adduct | z  |
|-----------|----------------|----------------|----------|-----------|--------|--------|----|
| 659.07    | C38H46N14O31P4 | C38H48N14O31P4 | 659.0707 | 1.1       | 45.3   | M-H    | 2- |

→ Le spectre de masse met en évidence la présence des adduits correspondant à un produit dont la formule brute est la suivante :  $C_{38}H_{48}N_{14}O_{31}P_4$ .



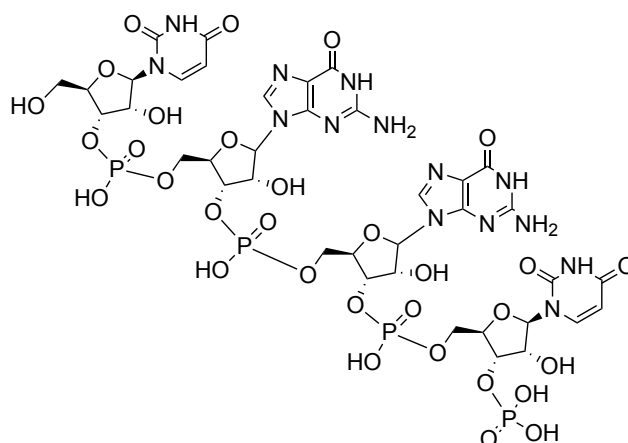

Chemical Formula:  $C_{38}H_{48}N_{14}O_{31}P_4$   
Exact Mass: 1320,16

4Rp

■ Composé 2 - Tr = 6.5 min

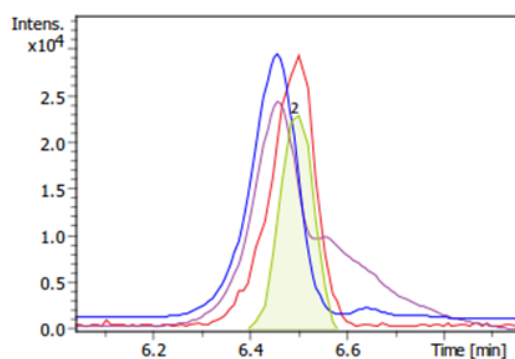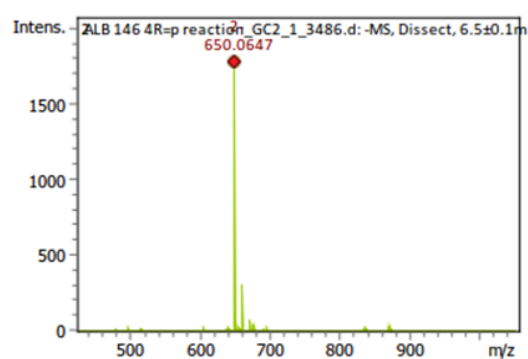

| Meas. m/z | Ion Formula                   | Sum Formula                   | m/z      | err [ppm] | mSigma | Adduct | z  |
|-----------|-------------------------------|-------------------------------|----------|-----------|--------|--------|----|
| 650.0647  | $C_{38}H_{44}N_{14}O_{30}P_4$ | $C_{38}H_{46}N_{14}O_{30}P_4$ | 650.0655 | 1.2       | 25.4   | M-H    | 2- |

→ Le spectre de masse met en évidence la présence des adduits correspondant à un produit dont la formule brute est la suivante :  $C_{38}H_{46}N_{14}O_{30}P_4$ .

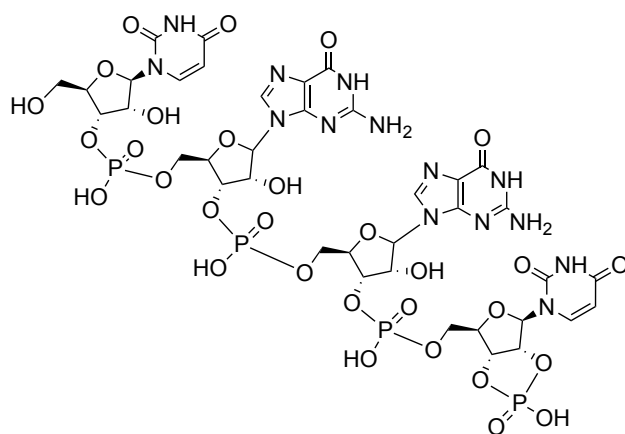

Chemical Formula:  $C_{38}H_{46}N_{14}O_{30}P_4$   
Exact Mass: 1302,15

4R>p

■ Composé 3 - Tr = 7.7 min

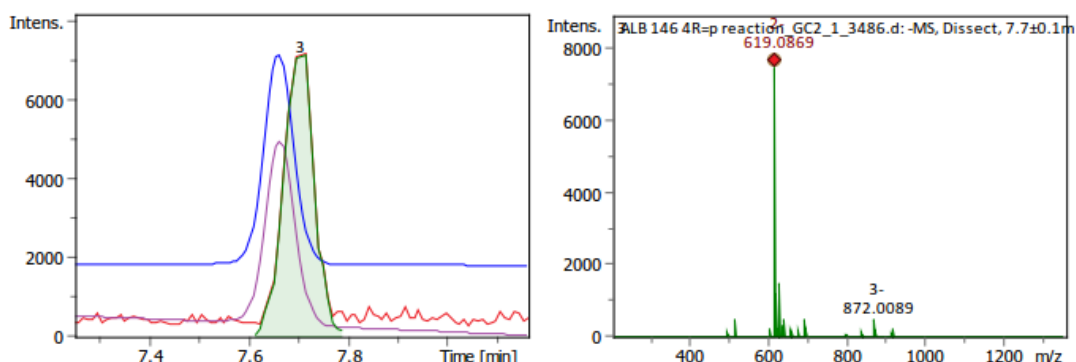

| Meas. m/z | Ion Formula    | Sum Formula    | m/z      | err [ppm] | mSigma | Adduct | z  |
|-----------|----------------|----------------|----------|-----------|--------|--------|----|
| 619.0869  | C38H45N14O28P3 | C38H47N14O28P3 | 619.0876 | 1         | 21.3   | M-H    | 2- |

→ Le spectre de masse met en évidence la présence des adduits correspondant à un produit dont la formule brute est la suivante : **C<sub>38</sub>H<sub>47</sub>N<sub>14</sub>O<sub>28</sub>P<sub>3</sub>**.

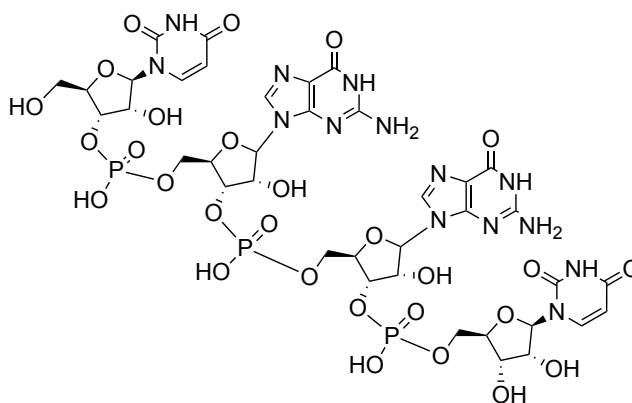

Chemical Formula: C<sub>38</sub>H<sub>47</sub>N<sub>14</sub>O<sub>28</sub>P<sub>3</sub>  
Exact Mass: 1240,19

4R

Figure S30. Results of the phosphate-cyclization experiment performed on 4Rp. UV chromatogram (260 nm) obtained from LC-MS analysis (negative mode) of the reaction products (RP elution with 5 mM NH<sub>4</sub>OAc pH 8.0/CH<sub>3</sub>CN:A 95:5) is shown with the compounds associated to the 3 main peaks (UV areas of the peaks were integrated to determine the proportions of the species present) characterized using LC-MS.

Subsequently, several experiments were performed with 4Rp, 5Rp and 9R (from D1 to D4 experiments) and the results were analysed using LC-MS as previously. Of note, out of all EDC derivatives found the structure of only one of several possible isomers is shown (Figs. S31-S37).

## D1 experiment:

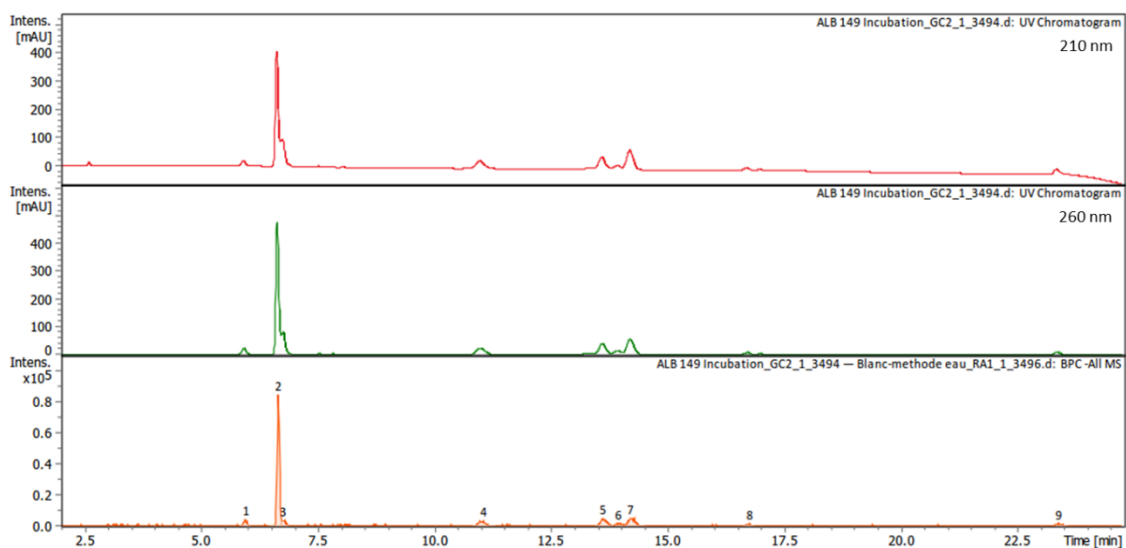

### ■ Composé 1 - Tr = 6.0 min

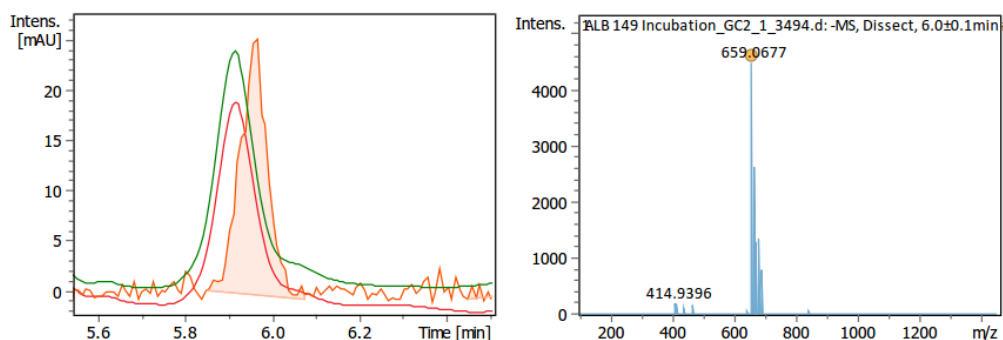

| Meas. m/z | Ion Formula    | Sum Formula    | m/z      | err [ppm] | mSigma | Adduct | z  |
|-----------|----------------|----------------|----------|-----------|--------|--------|----|
| 659.0677  | C38H46N14O31P4 | C38H48N14O31P4 | 659.0707 | 4.6       | 57.2   | M-H    | 2- |

→ Le spectre de masse met en évidence la présence des adduits correspondant à un produit dont la formule brute est la suivante : **C<sub>38</sub>H<sub>48</sub>N<sub>14</sub>O<sub>31</sub>P<sub>4</sub>**.

## 4Rp

### ■ Composé 2 - Tr = 6.7 min

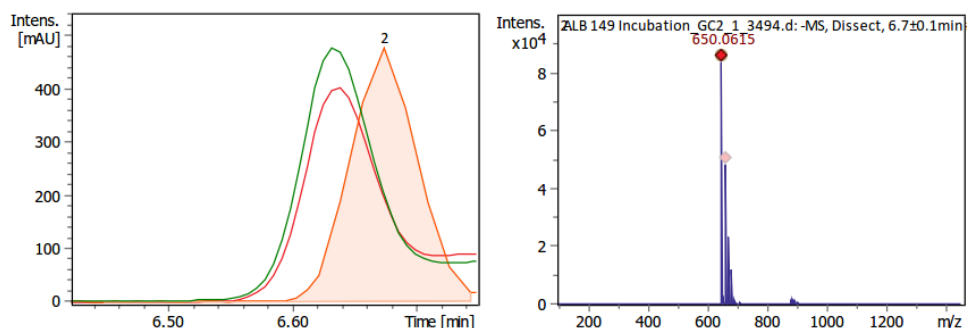

| Meas. m/z | Ion Formula    | Sum Formula    | m/z      | err [ppm] | mSigma | Adduct | z  |
|-----------|----------------|----------------|----------|-----------|--------|--------|----|
| 650.0615  | C38H44N14O30P4 | C38H46N14O30P4 | 650.0655 | 6.1       | 18.5   | M-H    | 2- |

→ Le spectre de masse met en évidence la présence des adduits correspondant à un produit dont la formule brute est la suivante : **C<sub>38</sub>H<sub>46</sub>N<sub>14</sub>O<sub>30</sub>P<sub>4</sub>**.

## 4R>p

■ Composé 3 - Tr = 6.8 min

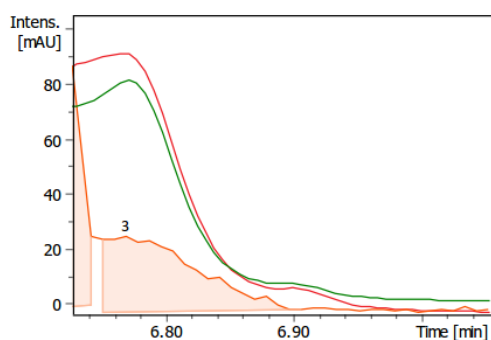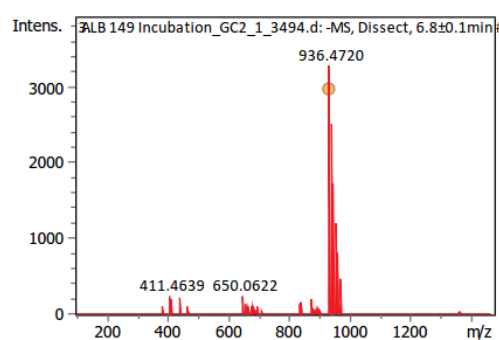

| Meas. m/z | Ion Formula                                                                     | Sum Formula                                                                     | m/z      | err [ppm] | mSigma | Adduct | z  |
|-----------|---------------------------------------------------------------------------------|---------------------------------------------------------------------------------|----------|-----------|--------|--------|----|
| 936.1378  | C <sub>85</sub> H <sub>106</sub> N <sub>35</sub> O <sub>59</sub> P <sub>8</sub> | C <sub>85</sub> H <sub>109</sub> N <sub>35</sub> O <sub>59</sub> P <sub>8</sub> | 936.1429 | 5.5       | 22.5   | M-H    | 3- |

→ Le spectre de masse met en évidence la présence des adduits correspondant à un produit dont la formule brute est la suivante : **C<sub>85</sub>H<sub>109</sub>N<sub>35</sub>O<sub>59</sub>P<sub>8</sub>**.

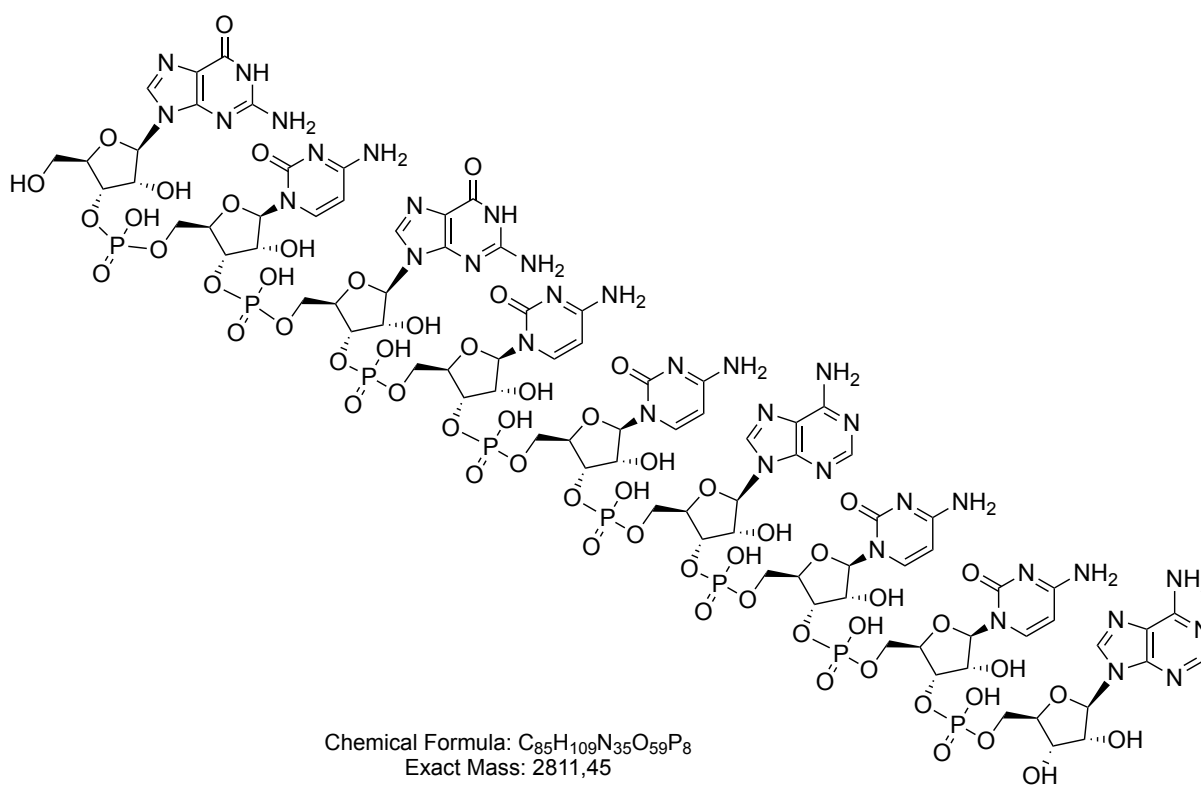

■ Composé 4 - Tr = 11.0 min

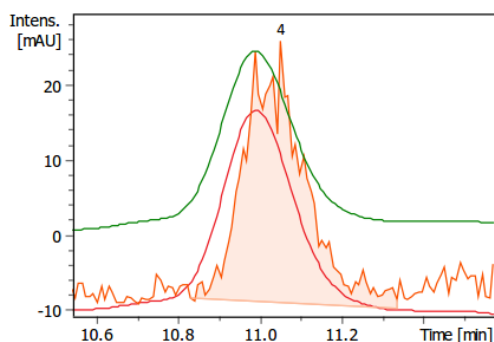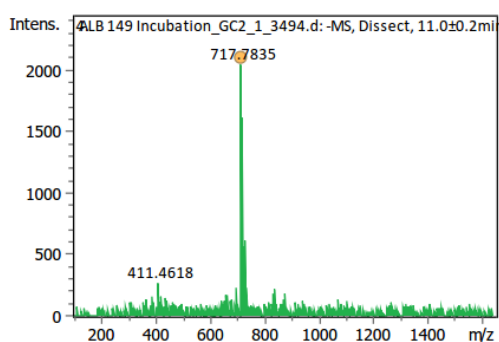

| Meas. m/z | Ion Formula                                                                    | Sum Formula                                                                    | m/z      | err [ppm] | mSigma | Adduct | z  |
|-----------|--------------------------------------------------------------------------------|--------------------------------------------------------------------------------|----------|-----------|--------|--------|----|
| 717.7835  | C <sub>78</sub> H <sub>82</sub> N <sub>22</sub> O <sub>42</sub> P <sub>5</sub> | C <sub>78</sub> H <sub>85</sub> N <sub>22</sub> O <sub>42</sub> P <sub>5</sub> | 717.7887 | 7.3       | 16.7   | M-H    | 3- |

→ Le spectre de masse met en évidence la présence des adduits correspondant à un produit dont la formule brute est la suivante : **C<sub>78</sub>H<sub>85</sub>N<sub>22</sub>O<sub>42</sub>P<sub>5</sub>**.

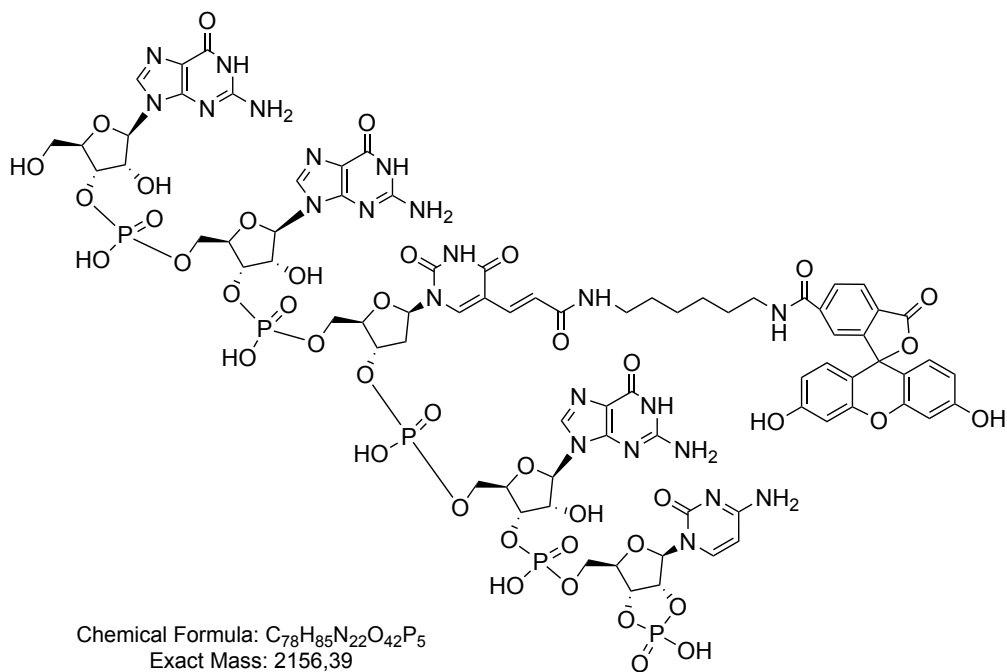

5R>p

■ Composé 5 - Tr = 13.7 min

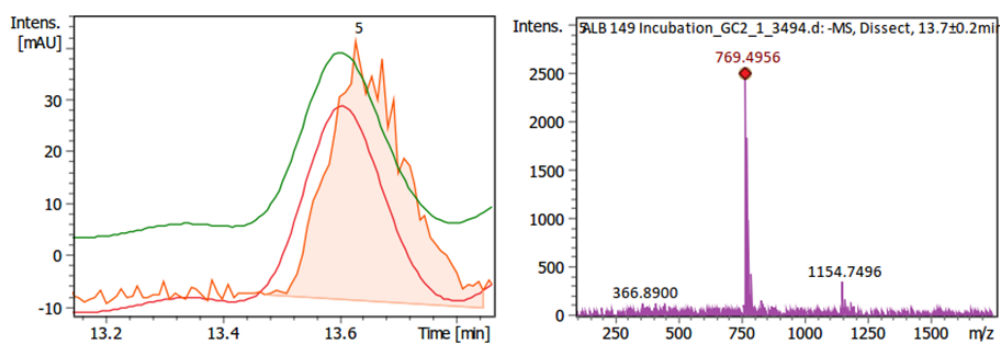

| Meas. m/z | Ion Formula                                                                    | Sum Formula                                                                     | m/z      | err [ppm] | mSigma | Adduct | z  |
|-----------|--------------------------------------------------------------------------------|---------------------------------------------------------------------------------|----------|-----------|--------|--------|----|
| 769.4956  | C <sub>86</sub> H <sub>99</sub> N <sub>25</sub> O <sub>42</sub> P <sub>5</sub> | C <sub>86</sub> H <sub>102</sub> N <sub>25</sub> O <sub>42</sub> P <sub>5</sub> | 769.5028 | 9.3       | 15.8   | M-H    | 3- |

→ Le spectre de masse met en évidence la présence des adduits correspondant à un produit dont la formule brute est la suivante : **C<sub>86</sub>H<sub>102</sub>N<sub>25</sub>O<sub>42</sub>P<sub>5</sub>**.

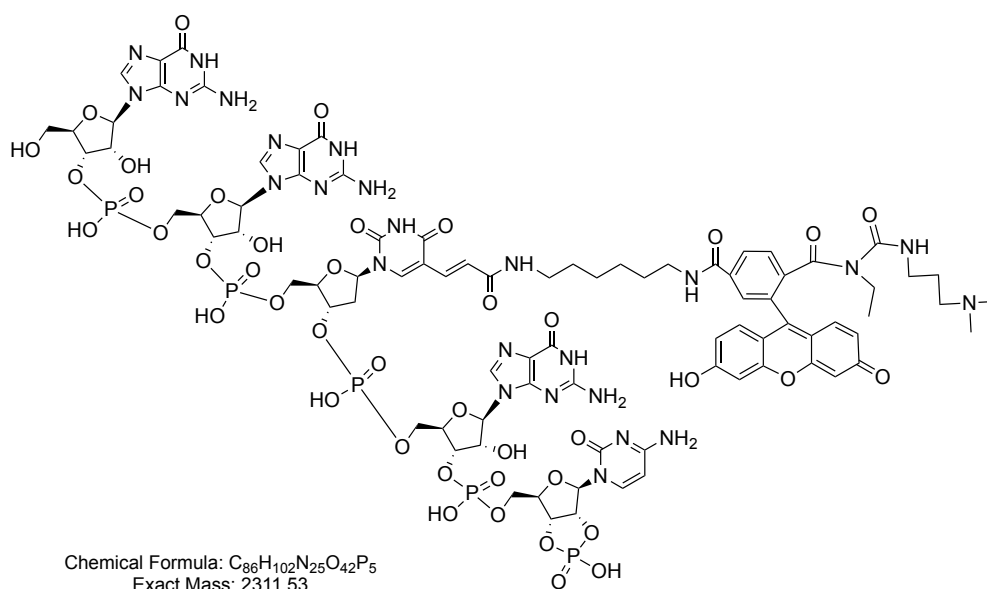

5R>p-EDC

■ Composé 6 - Tr = 14.0 min

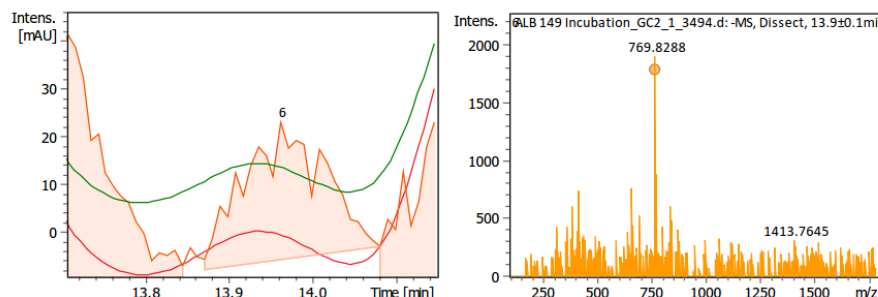

| Meas. m/z | Ion Formula                                                                    | Sum Formula                                                                     | m/z      | err [ppm] | mSigma | Adduct | z  |
|-----------|--------------------------------------------------------------------------------|---------------------------------------------------------------------------------|----------|-----------|--------|--------|----|
| 769.4949  | C <sub>86</sub> H <sub>99</sub> N <sub>25</sub> O <sub>42</sub> P <sub>5</sub> | C <sub>86</sub> H <sub>102</sub> N <sub>25</sub> O <sub>42</sub> P <sub>5</sub> | 769.5028 | 10.2      | 180.9  | M-H    | 3- |

→ Le spectre de masse met en évidence la présence des adduits correspondant à un produit dont la formule brute est la suivante : **C<sub>86</sub>H<sub>102</sub>N<sub>25</sub>O<sub>42</sub>P<sub>5</sub>**.

5R>p-EDC

Composé 7 - Tr = 14.2 min

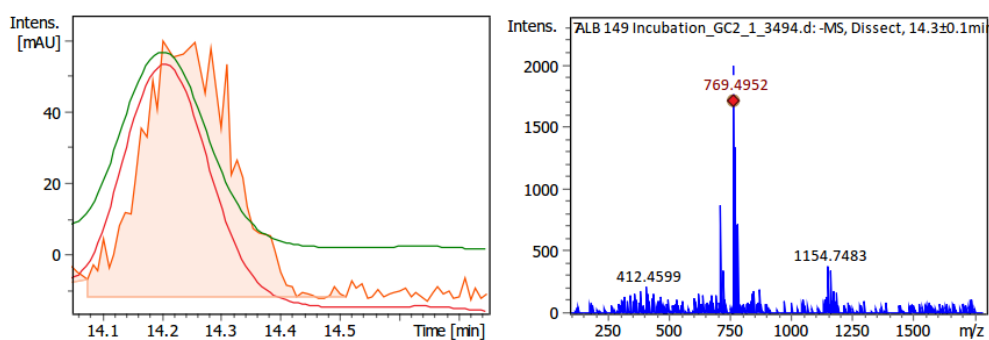

| Meas. m/z | Ion Formula    | Sum Formula     | m/z      | err [ppm] | mSigma | Adduct | z  |
|-----------|----------------|-----------------|----------|-----------|--------|--------|----|
| 769.4952  | C86H99N25O42P5 | C86H102N25O42P5 | 769.5028 | 9.9       | 56.1   | M-H    | 3- |

→ Le spectre de masse met en évidence la présence des adduits correspondant à un produit dont la formule brute est la suivante :  $C_{86}H_{102}N_{25}O_{42}P_5$ .

5R>p-EDC

Composé 8 - Tr = 16.8 min

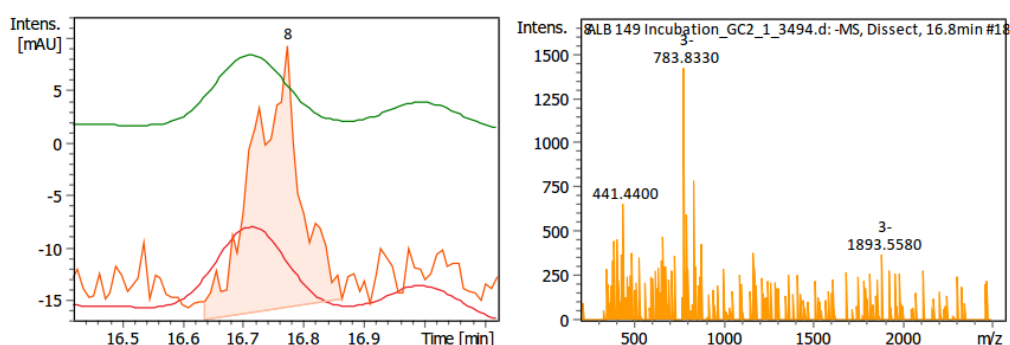

Soit  $M = 783.8330 \times 3 + 3 = 2354.5 \text{ Da}$

Unidentified derivative

Composé 9 - Tr = 23.4 min

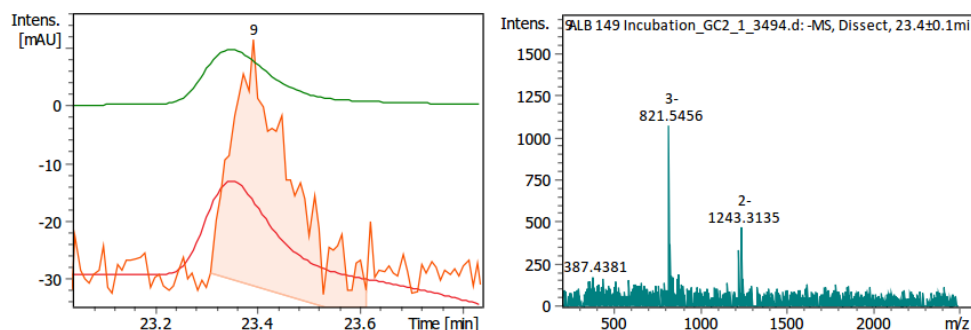

Soit  $M = 821.5456 \times 3 + 3 = 2467.6 \text{ Da}$

Unidentified derivative

Figure S31. LC-MS chromatogram (negative ion mode), UV chromatograms (260 and 210 nm), peaks and associated compounds obtained for the D1 experiment.

## D2.1 experiment:

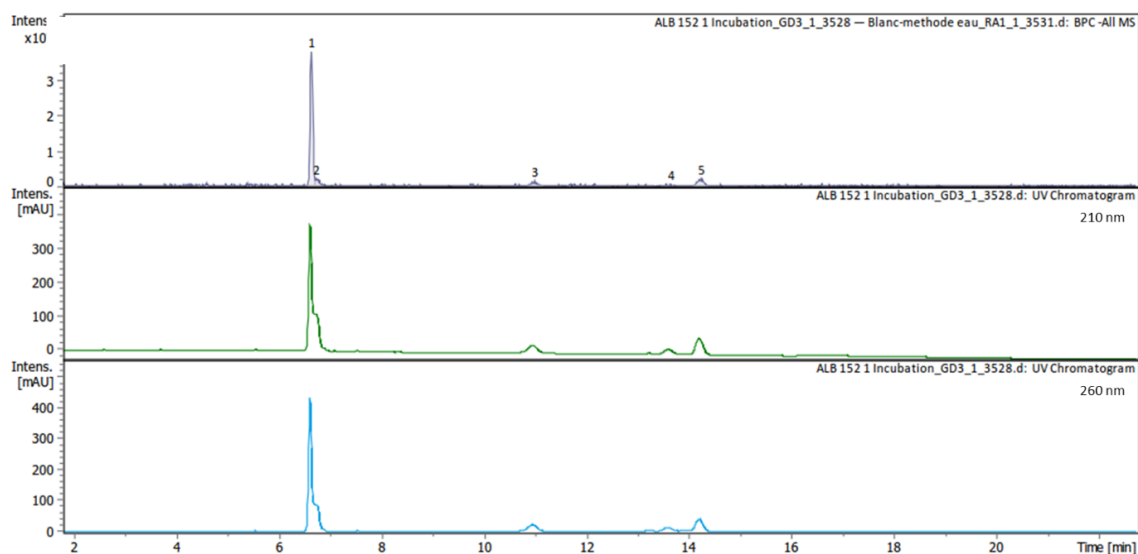

### ■ Composé 1 - Tr = 6.7 min

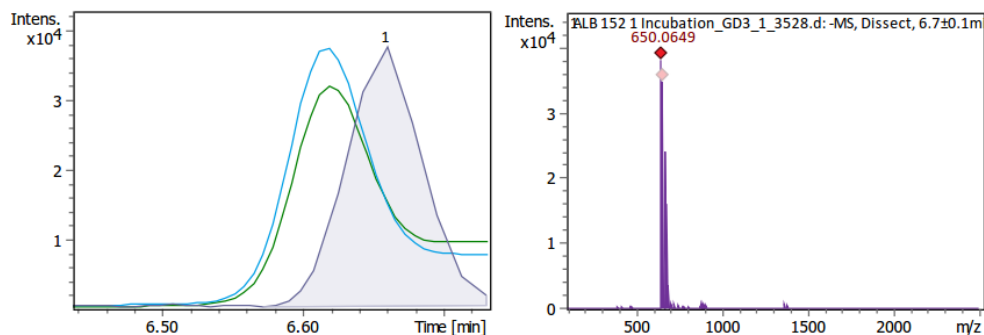

| Meas. m/z | Ion Formula    | Sum Formula    | m/z      | err [ppm] | mSigma | Adduct | z  |
|-----------|----------------|----------------|----------|-----------|--------|--------|----|
| 650.0649  | C38H44N14O30P4 | C38H46N14O30P4 | 650.0655 | 0.8       | 8.7    | M-H    | 2- |

→ Le spectre de masse met en évidence la présence des adduits correspondant à un produit dont la formule brute est la suivante : **C<sub>38</sub>H<sub>46</sub>N<sub>14</sub>O<sub>30</sub>P<sub>4</sub>**.

4Rp

### ■ Composé 2 - Tr = 6.7 min

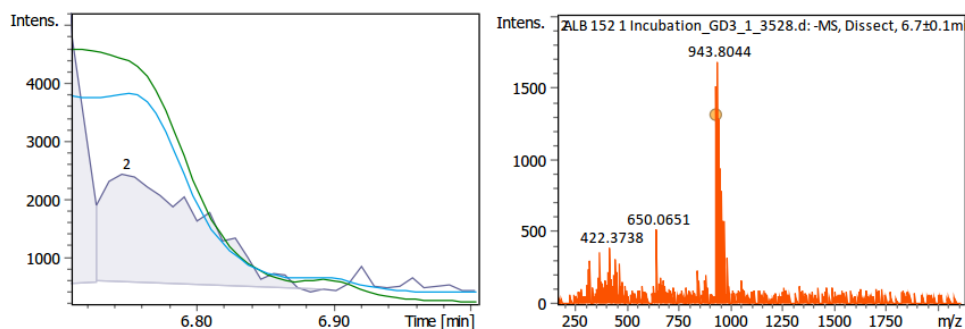

| Meas. m/z | Ion Formula     | Sum Formula     | m/z      | err [ppm] | mSigma | Adduct | z  |
|-----------|-----------------|-----------------|----------|-----------|--------|--------|----|
| 936.1423  | C85H106N35O59P8 | C85H109N35O59P8 | 936.1429 | 0.7       | 39.6   | M-H    | 3- |

→ Le spectre de masse met en évidence la présence des adduits correspondant à un produit dont la formule brute est la suivante : **C<sub>85</sub>H<sub>109</sub>N<sub>35</sub>O<sub>59</sub>P<sub>8</sub>**.

9R



■ Composé 3 - Tr = 11.0 min

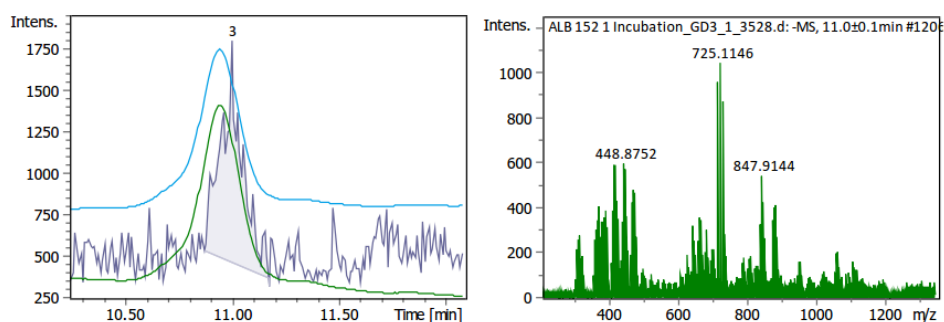

| Meas. m/z | Ion Formula    | Sum Formula    | m/z      | err [ppm] | mSigma | Adduct | z  |
|-----------|----------------|----------------|----------|-----------|--------|--------|----|
| 717.7876  | C78H82N22O42P5 | C78H85N22O42P5 | 717.7887 | 1.6       | 40.6   | M-H    | 3- |

→ Le spectre de masse met en évidence la présence des adduits correspondant à un produit dont la formule brute est la suivante :  $C_{78}H_{85}N_{22}O_{42}P_5$ .

5R>p

■ Composé 4 - Tr = 13.6 min

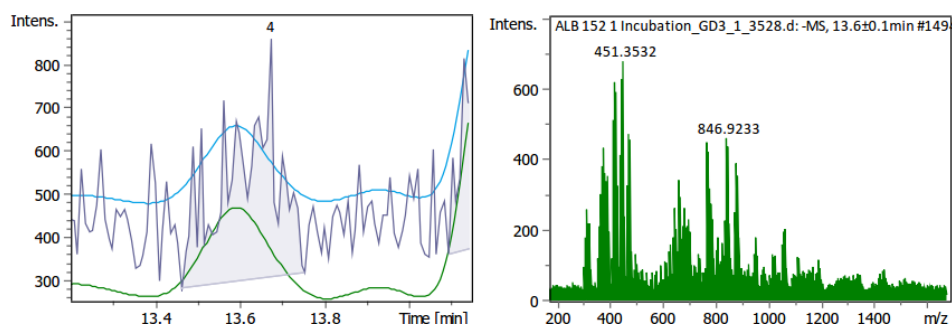

| Meas. m/z | Ion Formula    | Sum Formula     | m/z      | err [ppm] | mSigma | Adduct | z  |
|-----------|----------------|-----------------|----------|-----------|--------|--------|----|
| 769.5002  | C86H99N25O42P5 | C86H102N25O42P5 | 769.5028 | 3.4       | 71.6   | M-H    | 3- |

→ Le spectre de masse met en évidence la présence des adduits correspondant à un produit dont la formule brute est la suivante :  $C_{86}H_{102}N_{25}O_{42}P_5$ .

5R>p-EDC

■ Composé 5 - Tr = 14.2 min

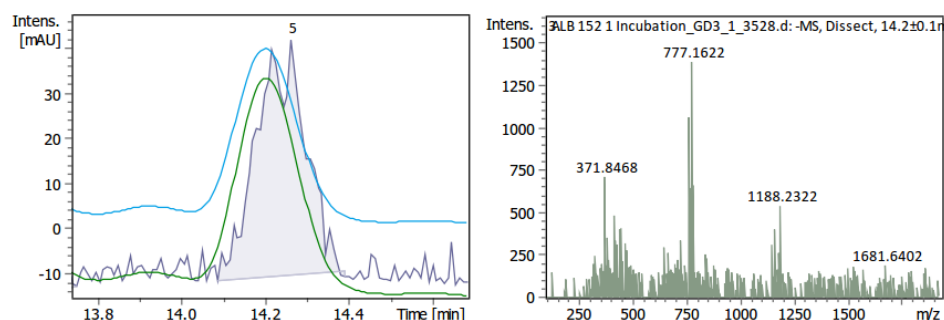

| Meas. m/z | Ion Formula    | Sum Formula     | m/z      | err [ppm] | mSigma | Adduct | z  |
|-----------|----------------|-----------------|----------|-----------|--------|--------|----|
| 769.5006  | C86H99N25O42P5 | C86H102N25O42P5 | 769.5028 | 2.9       | 58.9   | M-H    | 3- |

→ Le spectre de masse met en évidence la présence des adduits correspondant à un produit dont la formule brute est la suivante :  $C_{86}H_{102}N_{25}O_{42}P_5$ .

5R>p-EDC

Figure S32. LC-MS chromatogram (negative mode), UV chromatograms (260 and 210 nm), peaks and associated compounds obtained for the D2.1 experiment.

## D2.2 experiment:

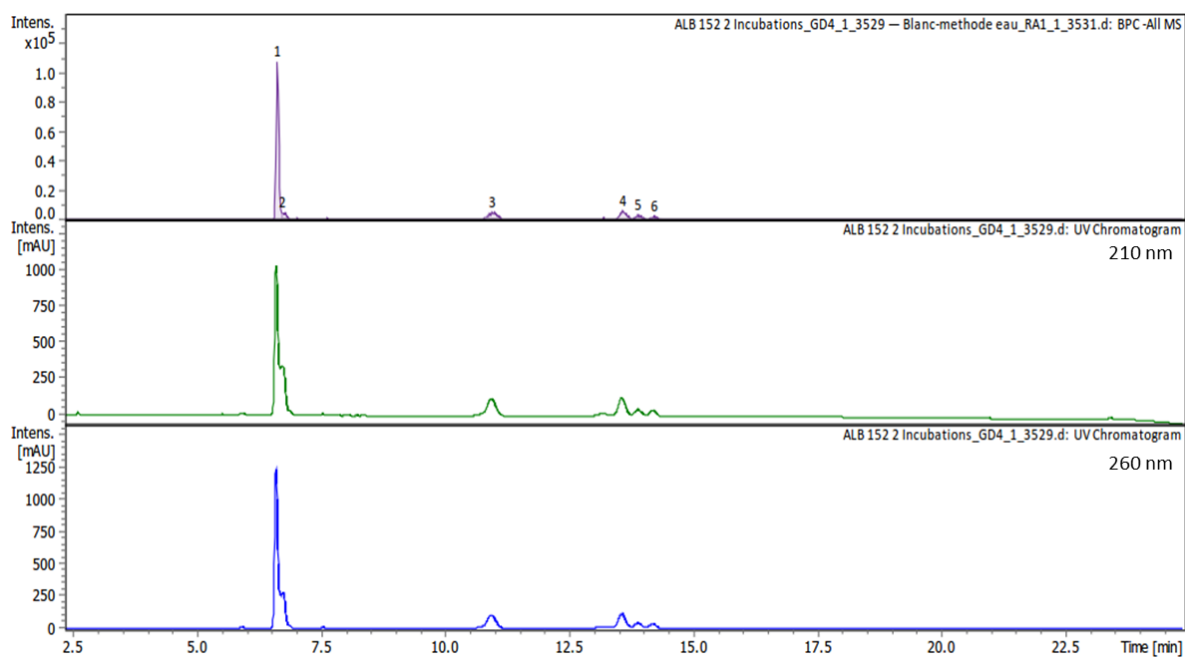

■ Composé 1 - Tr = 6.6 min

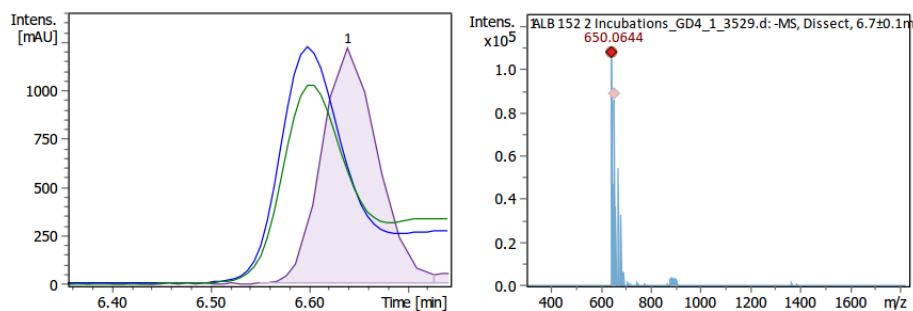

| Meas. m/z | Ion Formula    | Sum Formula    | m/z      | err [ppm] | mSigma | Adduct | z  |
|-----------|----------------|----------------|----------|-----------|--------|--------|----|
| 650.0644  | C38H44N14O30P4 | C38H46N14O30P4 | 650.0655 | 1.6       | 21     | M-H    | 2- |

→ Le spectre de masse met en évidence la présence des adduits correspondant à un produit dont la formule brute est la suivante :  $C_{38}H_{46}N_{14}O_{30}P_4$ .

4R>p

■ Composé 2 - Tr = 6.7 min

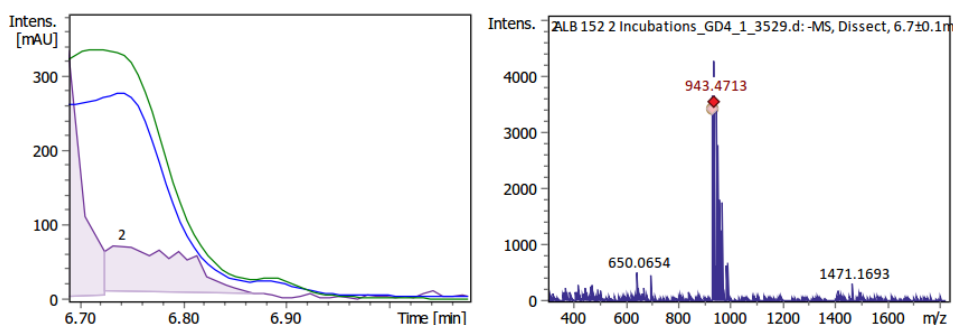

| Meas. m/z | Ion Formula     | Sum Formula     | m/z      | err [ppm] | mSigma | Adduct | z  |
|-----------|-----------------|-----------------|----------|-----------|--------|--------|----|
| 936.1449  | C85H106N35O59P8 | C85H109N35O59P8 | 936.1429 | -2.1      | 25.6   | M-H    | 3- |

→ Le spectre de masse met en évidence la présence des adduits correspondant à un produit dont la formule brute est la suivante :  $C_{85}H_{109}N_{35}O_{59}P_8$ .

9R

Composé 3 - Tr = 11.0 min

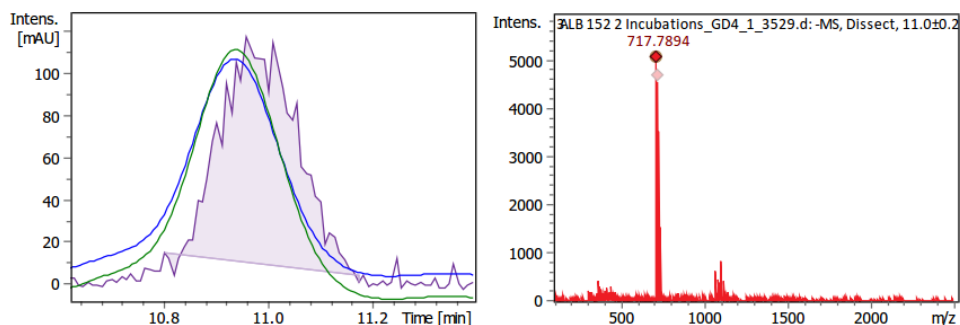

| Meas. m/z | Ion Formula    | Sum Formula    | m/z      | err [ppm] | mSigma | Adduct | z  |
|-----------|----------------|----------------|----------|-----------|--------|--------|----|
| 717.7894  | C78H82N22O42P5 | C78H85N22O42P5 | 717.7887 | -0.9      | 23.9   | M-H    | 3- |

→ Le spectre de masse met en évidence la présence des adduits correspondant à un produit dont la formule brute est la suivante : **C<sub>78</sub>H<sub>85</sub>N<sub>22</sub>O<sub>42</sub>P<sub>5</sub>**.

5R>p

Composé 4 - Tr = 13.2 min

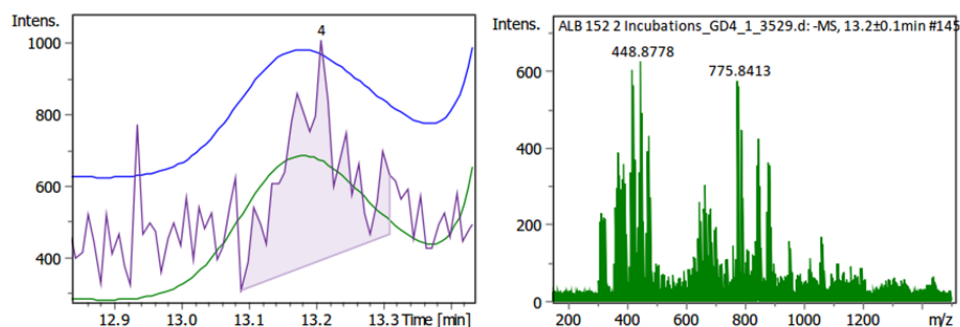

| Meas. m/z | Ion Formula     | Sum Formula     | m/z      | err [ppm] | mSigma | Adduct | z  |
|-----------|-----------------|-----------------|----------|-----------|--------|--------|----|
| 775.5075  | C86H101N25O43P5 | C86H104N25O43P5 | 775.5063 | -1.5      | 64.1   | M-H    | 3- |

→ Le spectre de masse met en évidence la présence des adduits correspondant à un produit dont la formule brute est la suivante : **C<sub>86</sub>H<sub>104</sub>N<sub>25</sub>O<sub>43</sub>P<sub>5</sub>**.

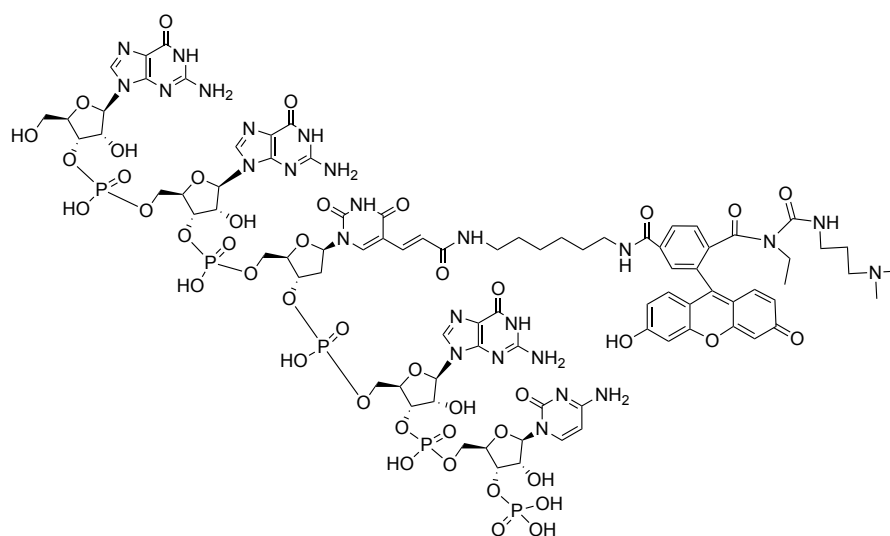

Chemical Formula: C<sub>86</sub>H<sub>104</sub>N<sub>25</sub>O<sub>43</sub>P<sub>5</sub>  
Exact Mass: 2329,54

5Rp-EDC

■ Composé 5 - Tr = 13.6 min

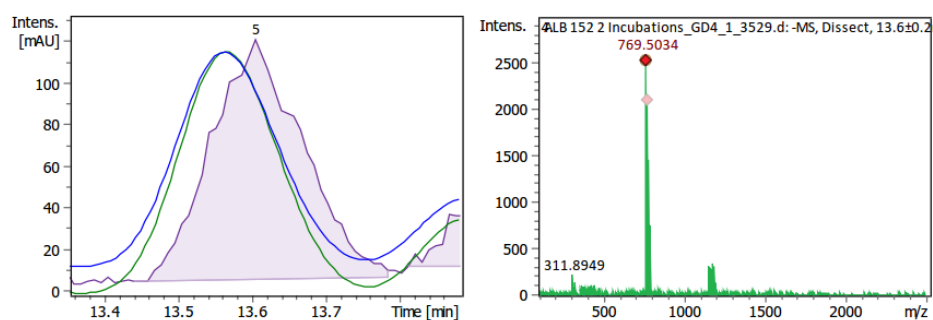

| Meas. m/z | Ion Formula                                                                    | Sum Formula                                                                     | m/z      | err [ppm] | mSigma | Adduct | z  |
|-----------|--------------------------------------------------------------------------------|---------------------------------------------------------------------------------|----------|-----------|--------|--------|----|
| 769.5034  | C <sub>86</sub> H <sub>99</sub> N <sub>25</sub> O <sub>42</sub> P <sub>5</sub> | C <sub>86</sub> H <sub>102</sub> N <sub>25</sub> O <sub>42</sub> P <sub>5</sub> | 769.5028 | -0.7      | 30.5   | M-H    | 3- |

→ Le spectre de masse met en évidence la présence des adduits correspondant à un produit dont la formule brute est la suivante : **C<sub>86</sub>H<sub>102</sub>N<sub>25</sub>O<sub>42</sub>P<sub>5</sub>**.

5R>p-EDC

■ Composé 6 - Tr = 13.9 min

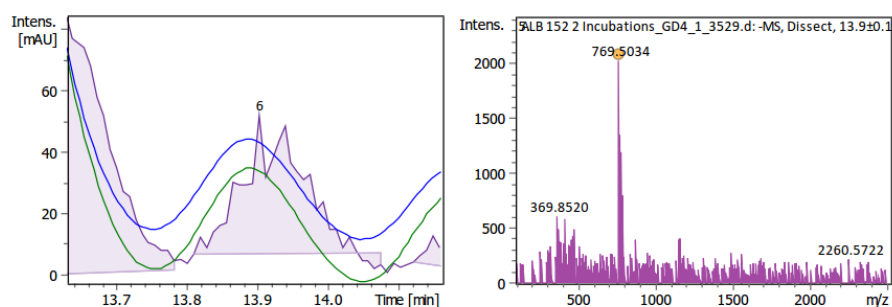

| Meas. m/z | Ion Formula                                                                    | Sum Formula                                                                     | m/z      | err [ppm] | mSigma | Adduct | z  |
|-----------|--------------------------------------------------------------------------------|---------------------------------------------------------------------------------|----------|-----------|--------|--------|----|
| 769.5034  | C <sub>86</sub> H <sub>99</sub> N <sub>25</sub> O <sub>42</sub> P <sub>5</sub> | C <sub>86</sub> H <sub>102</sub> N <sub>25</sub> O <sub>42</sub> P <sub>5</sub> | 769.5028 | -0.7      | 36     | M-H    | 3- |

→ Le spectre de masse met en évidence la présence des adduits correspondant à un produit dont la formule brute est la suivante : **C<sub>86</sub>H<sub>102</sub>N<sub>25</sub>O<sub>42</sub>P<sub>5</sub>**.

5R>p-EDC

Figure S33. LC-MS chromatogram (negative ion mode), UV chromatograms (260 and 210 nm), peaks and associated compounds obtained for the D2.2 experiment.

## D2.3 experiment:

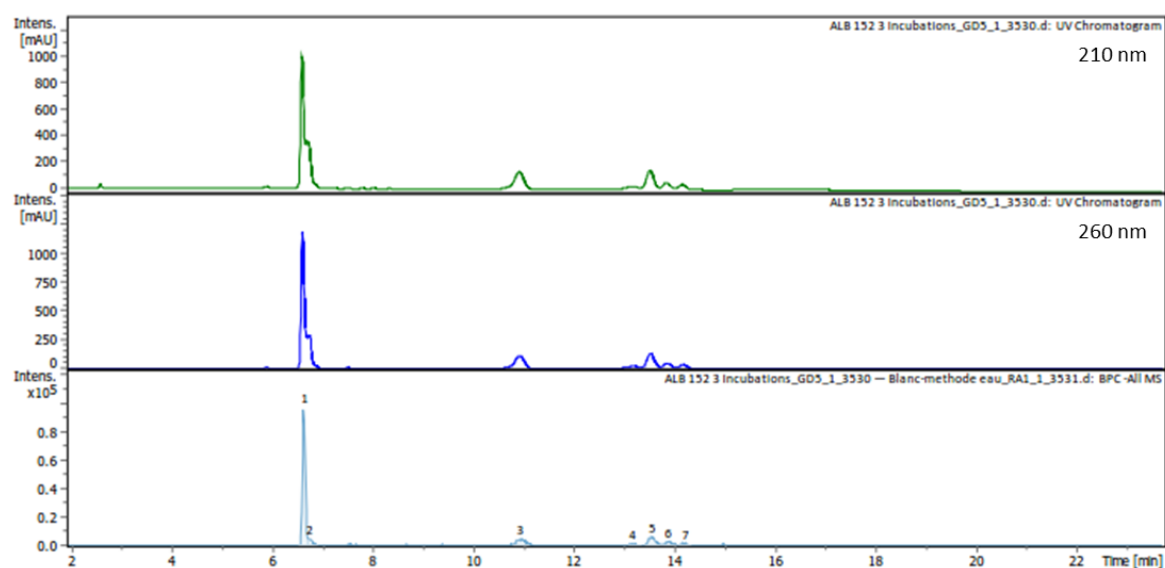

### Composé 1 - Tr = 6.6 min

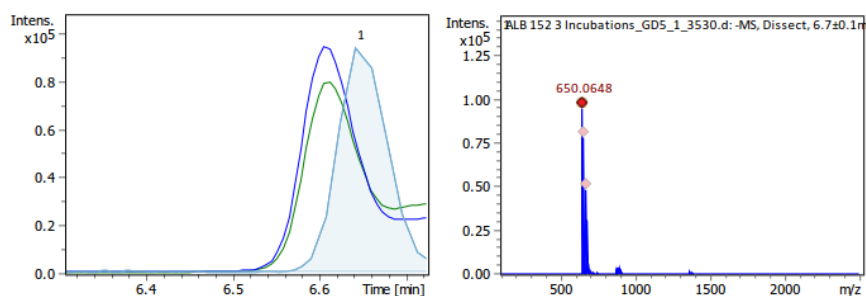

| Meas. m/z | Ion Formula                                                                   | Sum Formula                                                                   | m/z      | err [ppm] | mSigma | Adduct | z  |
|-----------|-------------------------------------------------------------------------------|-------------------------------------------------------------------------------|----------|-----------|--------|--------|----|
| 650.0648  | C <sub>38</sub> H <sub>44</sub> N <sub>14</sub> O <sub>3</sub> P <sub>4</sub> | C <sub>38</sub> H <sub>46</sub> N <sub>14</sub> O <sub>3</sub> P <sub>4</sub> | 650.0655 | 1         | 25.7   | M-H    | 2- |

→ Le spectre de masse met en évidence la présence des adduits correspondant à un produit dont la formule brute est la suivante : **C<sub>38</sub>H<sub>46</sub>N<sub>14</sub>O<sub>3</sub>P<sub>4</sub>**.

## 4R>p-EDC

### Composé 2 - Tr = 6.8 min

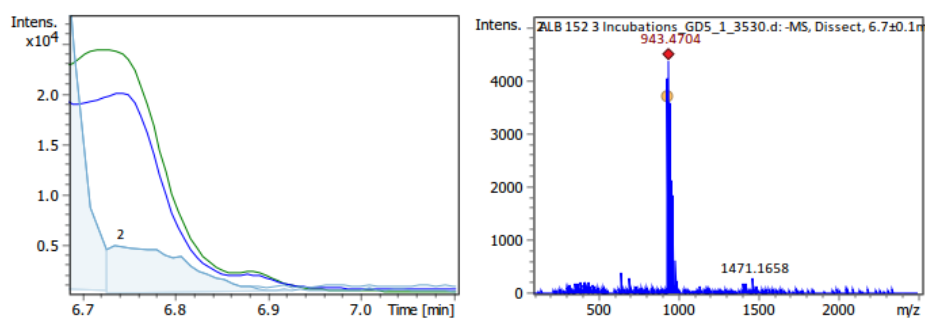

| Meas. m/z | Ion Formula                                                                     | Sum Formula                                                                     | m/z      | err [ppm] | mSigma | Adduct | z  |
|-----------|---------------------------------------------------------------------------------|---------------------------------------------------------------------------------|----------|-----------|--------|--------|----|
| 936.1436  | C <sub>85</sub> H <sub>106</sub> N <sub>35</sub> O <sub>59</sub> P <sub>8</sub> | C <sub>85</sub> H <sub>109</sub> N <sub>35</sub> O <sub>59</sub> P <sub>8</sub> | 936.1429 | -0.7      | 26.3   | M-H    | 3- |

→ Le spectre de masse met en évidence la présence des adduits correspondant à un produit dont la formule brute est la suivante : **C<sub>85</sub>H<sub>109</sub>N<sub>35</sub>O<sub>59</sub>P<sub>8</sub>**.

■ Composé 3 - Tr = 10.9 min

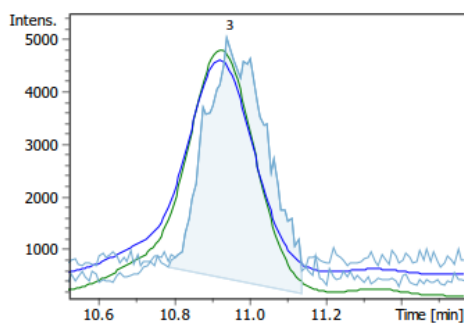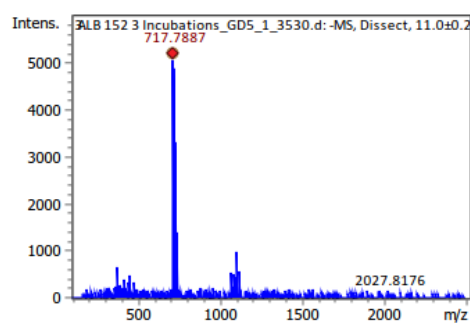

| Meas. m/z | Ion Formula    | Sum Formula    | m/z      | err [ppm] | mSigma | Adduct | z  |
|-----------|----------------|----------------|----------|-----------|--------|--------|----|
| 717.7887  | C78H82N22O42P5 | C78H85N22O42P5 | 717.7887 | 0.1       | 16.7   | M-H    | 3- |

→ Le spectre de masse met en évidence la présence des adduits correspondant à un produit dont la formule brute est la suivante :  $C_{78}H_{85}N_{22}O_{42}P_5$ .

5R>p

■ Composé 4 - Tr = 13.2 min

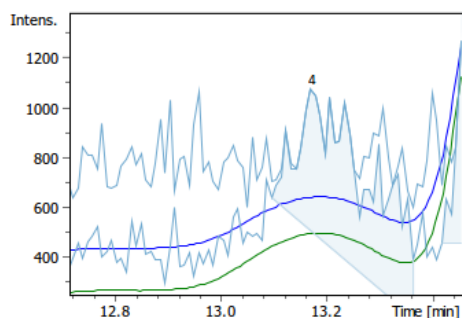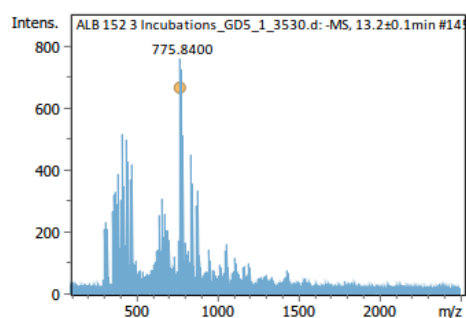

| Meas. m/z | Ion Formula     | Sum Formula     | m/z      | err [ppm] | mSigma | Adduct | z  |
|-----------|-----------------|-----------------|----------|-----------|--------|--------|----|
| 775.5066  | C86H101N25O43P5 | C86H104N25O43P5 | 775.5063 | -0.3      | 64.4   | M-H    | 3- |

→ Le spectre de masse met en évidence la présence des adduits correspondant à un produit dont la formule brute est la suivante :  $C_{86}H_{104}N_{25}O_{43}P_5$ .

5R-p-EDC

■ Composé 5 - Tr = 13.6 min

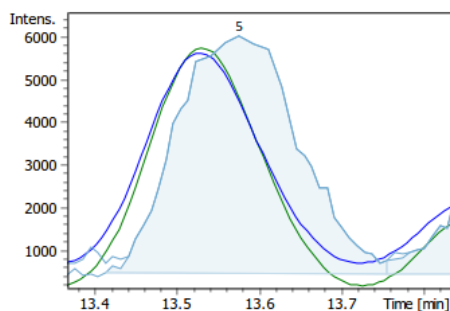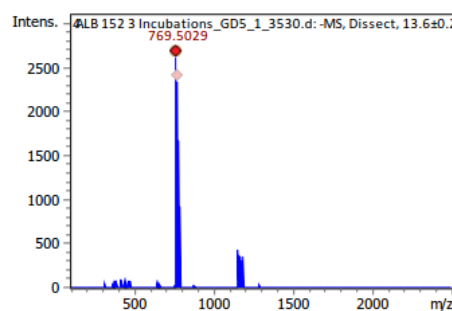

| Meas. m/z | Ion Formula    | Sum Formula     | m/z      | err [ppm] | mSigma | Adduct | z  |
|-----------|----------------|-----------------|----------|-----------|--------|--------|----|
| 769.5029  | C86H99N25O42P5 | C86H102N25O42P5 | 769.5028 | -0.1      | 23.6   | M-H    | 3- |

→ Le spectre de masse met en évidence la présence des adduits correspondant à un produit dont la formule brute est la suivante :  $C_{86}H_{102}N_{25}O_{42}P_5$ .

5R>p-EDC

▪ Composé 6 - Tr = 13.9 min

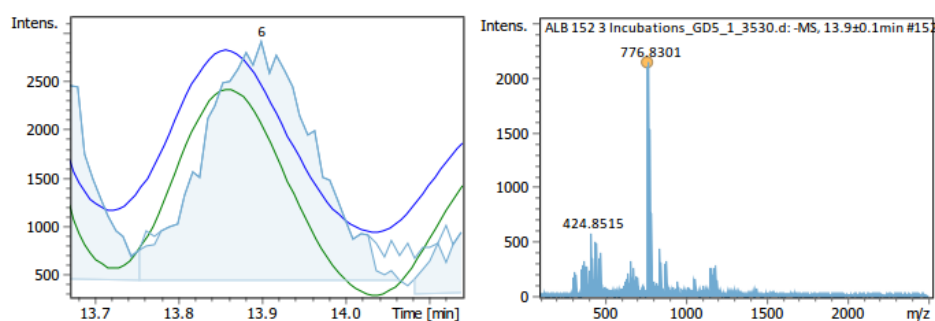

| Meas. m/z | Ion Formula    | Sum Formula     | m/z      | err [ppm] | mSigma | Adduct | z  |
|-----------|----------------|-----------------|----------|-----------|--------|--------|----|
| 769.5026  | C86H99N25O42P5 | C86H102N25O42P5 | 769.5028 | 0.3       | 26.7   | M-H    | 3- |

→ Le spectre de masse met en évidence la présence des adduits correspondant à un produit dont la formule brute est la suivante :  $C_{86}H_{102}N_{25}O_{42}P_5$ .

5R>p-EDC

▪ Composé 7 - Tr = 14.2 min

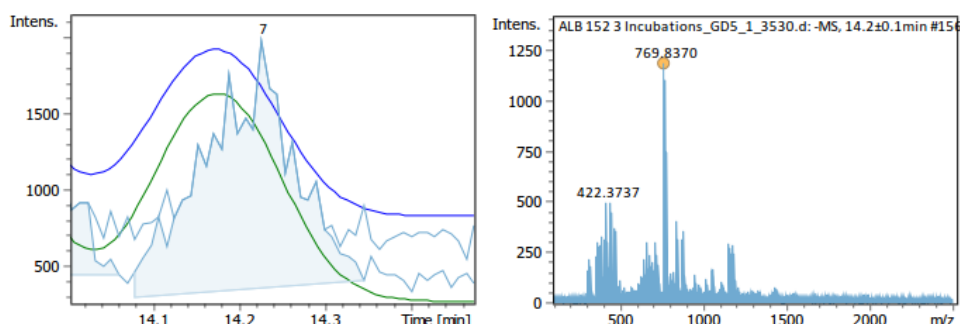

| Meas. m/z | Ion Formula    | Sum Formula     | m/z      | err [ppm] | mSigma | Adduct | z  |
|-----------|----------------|-----------------|----------|-----------|--------|--------|----|
| 769.5034  | C86H99N25O42P5 | C86H102N25O42P5 | 769.5028 | -0.7      | 19.4   | M-H    | 3- |

→ Le spectre de masse met en évidence la présence des adduits correspondant à un produit dont la formule brute est la suivante :  $C_{86}H_{102}N_{25}O_{42}P_5$ .

5R>p-EDC

Figure S34. LC-MS chromatogram (negative ion mode), UV chromatograms (260 and 210 nm), peaks and associated compounds obtained for the D2.3 experiment.

A kinetic for the different species (coming from 4Rp and 5Rp) could be determine for the D2 experiments:

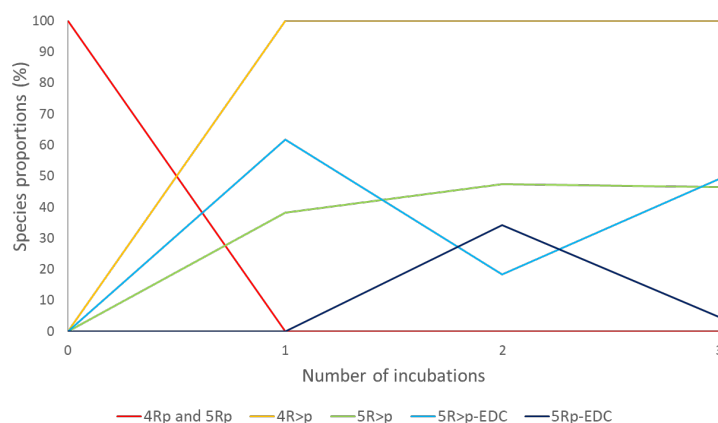

Figure S35. Proportions of the main species (others than 9R) found for D2.1, D2.2 and D2.3 experiments over the number of incubations. These ratios were calculated using the UV absorbance of the corresponding compound peaks detected by LC-MS analyses (RP elution with 5 mM  $NH_4OAc$  pH 8.0/  $CH_3CN/A$  95:5) (Fig. S32-34).

D3 experiment:

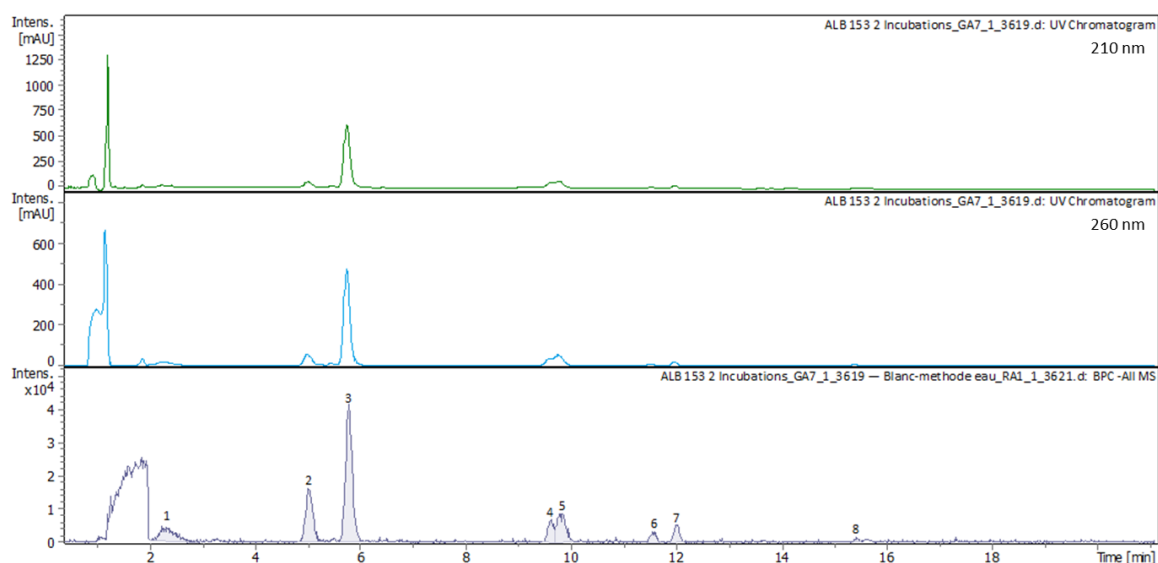

Ion extractions for the 2 possible products of ligation:

9Rfp ( $C_{116}H_{133}N_{36}O_{73}P_9$ ) or 9Rf>p ( $C_{116}H_{131}N_{36}O_{72}P_9$ )

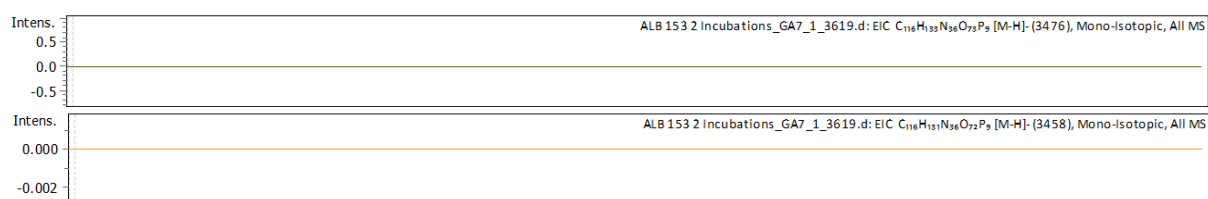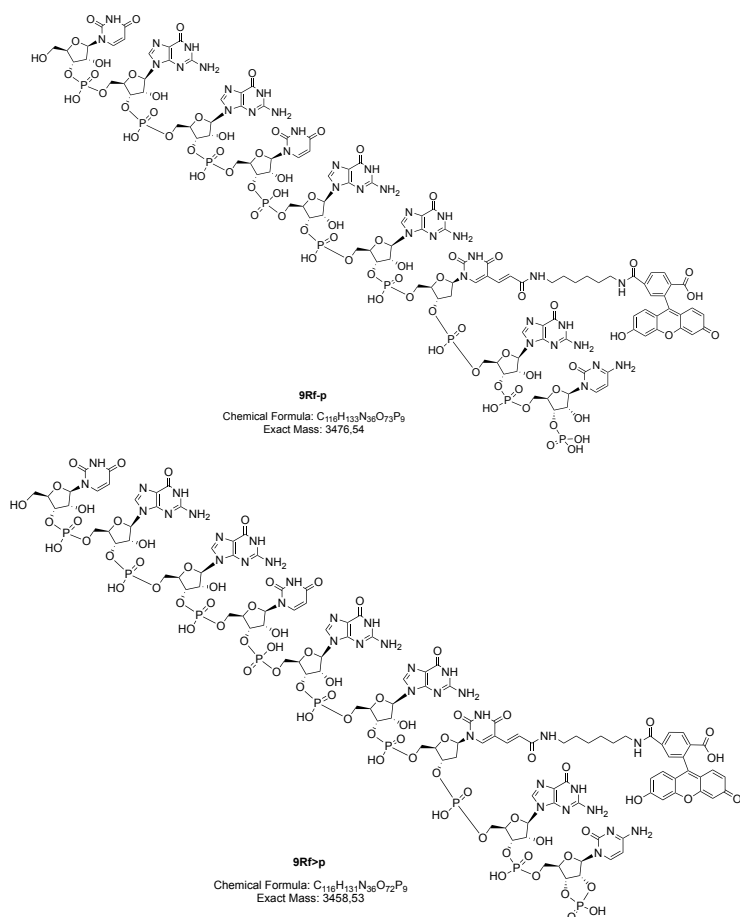



■ Composé 1 - Tr = 2.3 min

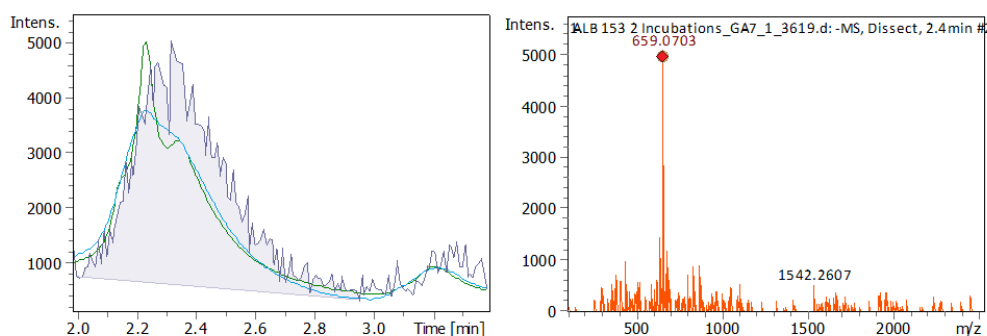

| Meas. m/z | Ion Formula    | Sum Formula    | m/z      | err [ppm] | mSigma | Adduct | z  |
|-----------|----------------|----------------|----------|-----------|--------|--------|----|
| 659.0703  | C38H46N14O31P4 | C38H48N14O31P4 | 659.0707 | 0.7       | 40.1   | M-H    | 2- |

→ Le spectre de masse met en évidence la présence des adduits correspondant à un produit dont la formule brute est la suivante :  $C_{38}H_{48}N_{14}O_{31}P_4$ .

4Rp

■ Composé 2 - Tr = 5.0 min

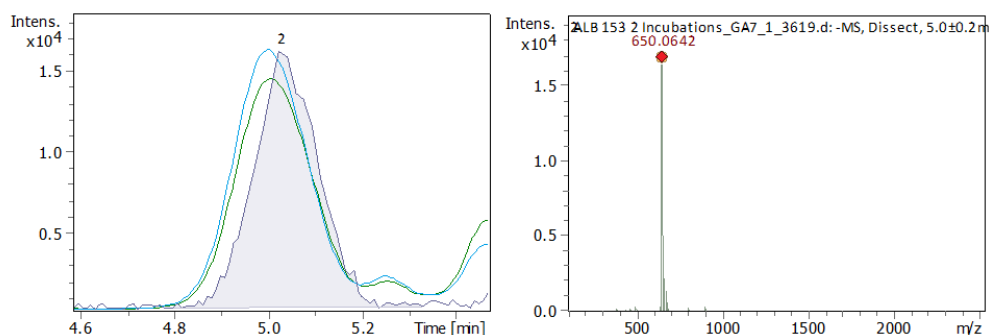

| Meas. m/z | Ion Formula    | Sum Formula    | m/z      | err [ppm] | mSigma | Adduct | z  |
|-----------|----------------|----------------|----------|-----------|--------|--------|----|
| 650.0642  | C38H44N14O30P4 | C38H46N14O30P4 | 650.0655 | 2         | 18.5   | M-H    | 2- |

→ Le spectre de masse met en évidence la présence des adduits correspondant à un produit dont la formule brute est la suivante :  $C_{38}H_{46}N_{14}O_{30}P_4$ .

4R>p

■ Composé 3 - Tr = 5.8 min

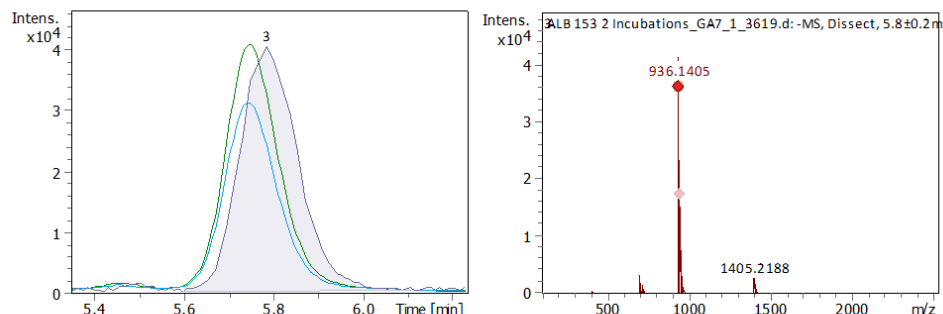

| Meas. m/z | Ion Formula     | Sum Formula     | m/z      | err [ppm] | mSigma | Adduct | z  |
|-----------|-----------------|-----------------|----------|-----------|--------|--------|----|
| 936.1405  | C85H106N35O59P8 | C85H109N35O59P8 | 936.1429 | 2.6       | 32.1   | M-H    | 3- |

→ Le spectre de masse met en évidence la présence des adduits correspondant à un produit dont la formule brute est la suivante :  $C_{85}H_{109}N_{35}O_{59}P_8$ .

■ Composé 4 - Tr = 9.6 min

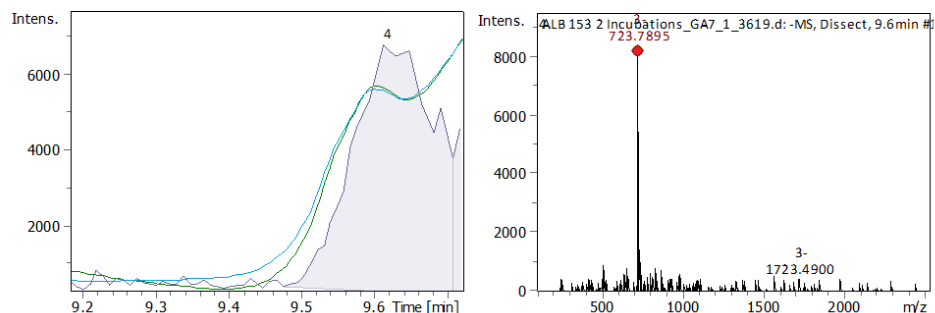

| Meas. m/z | Ion Formula    | Sum Formula    | m/z      | err [ppm] | mSigma | Adduct | z  |
|-----------|----------------|----------------|----------|-----------|--------|--------|----|
| 723.7895  | C78H84N22O43P5 | C78H87N22O43P5 | 723.7922 | 3.8       | 149.6  | M-H    | 3- |

→ Le spectre de masse met en évidence la présence des adduits correspondant à un produit dont la formule brute est la suivante :  $C_{78}H_{87}N_{22}O_{43}P_5$ .

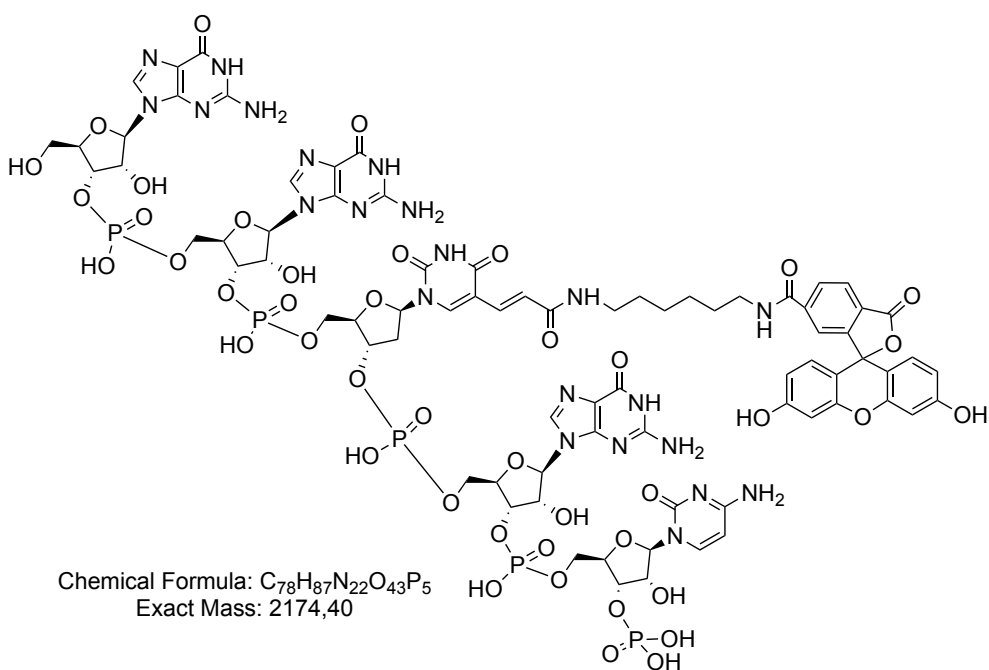

5Rp

■ Composé 5 - Tr = 9.8 min

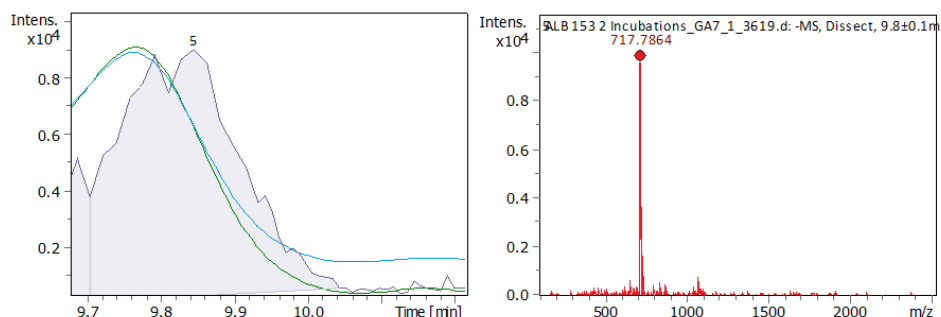

| Meas. m/z | Ion Formula    | Sum Formula    | m/z      | err [ppm] | mSigma | Adduct | z  |
|-----------|----------------|----------------|----------|-----------|--------|--------|----|
| 717.7864  | C78H82N22O42P5 | C78H85N22O42P5 | 717.7887 | 3.3       | 5.2    | M-H    | 3- |

→ Le spectre de masse met en évidence la présence des adduits correspondant à un produit dont la formule brute est la suivante :  $C_{78}H_{85}N_{22}O_{42}P_5$ .

## 5R>p

- Composé 6 - Tr = 11.6 min

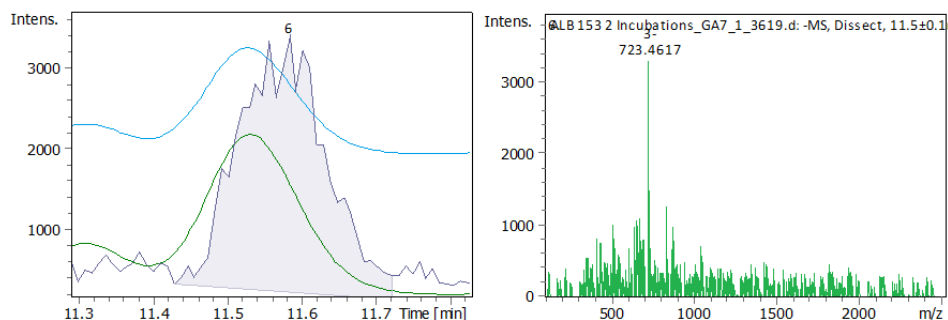

| Meas. m/z | Ion Formula    | Sum Formula    | m/z      | err [ppm] | mSigma | Adduct | z  |
|-----------|----------------|----------------|----------|-----------|--------|--------|----|
| 723.4617  | C78H85N23O42P5 | C78H88N23O42P5 | 723.4642 | 3.5       | 94.8   | M-H    | 3- |

→ Le spectre de masse met en évidence la présence des adduits correspondant à un produit dont la formule brute est la suivante :  $C_{78}H_{88}N_{23}O_{42}P_5$ .

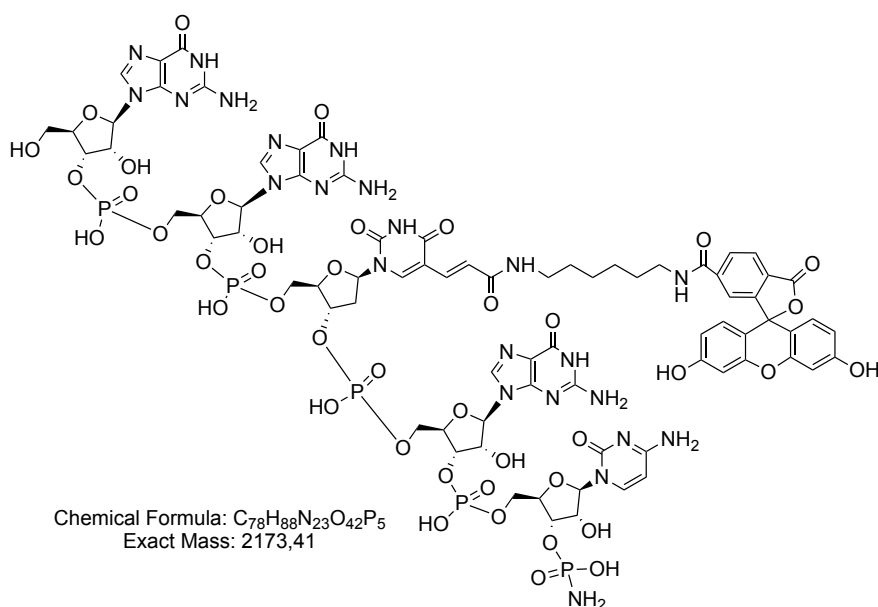

## 5Rp-NH<sub>2</sub>

- Composé 7 - Tr = 12.0 min

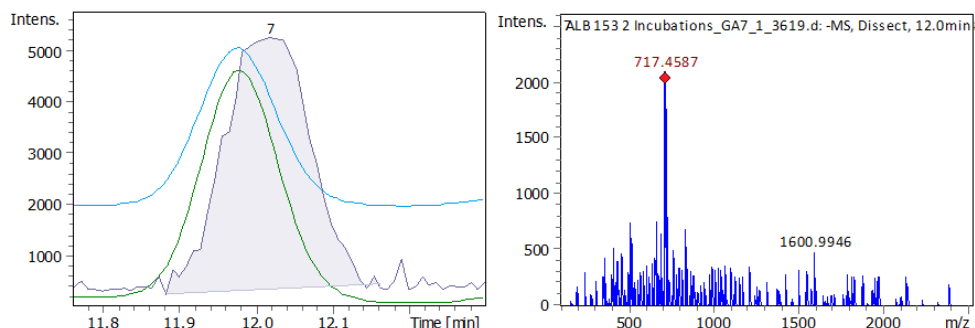

| Meas. m/z | Ion Formula    | Sum Formula    | m/z      | err [ppm] | mSigma | Adduct | z  |
|-----------|----------------|----------------|----------|-----------|--------|--------|----|
| 717.4587  | C78H83N23O41P5 | C78H86N23O41P5 | 717.4607 | 2.8       | 49.7   | M-H    | 3- |

→ Le spectre de masse met en évidence la présence des adduits correspondant à un produit dont la formule brute est la suivante :  $C_{78}H_{86}N_{23}O_{41}P_5$ .

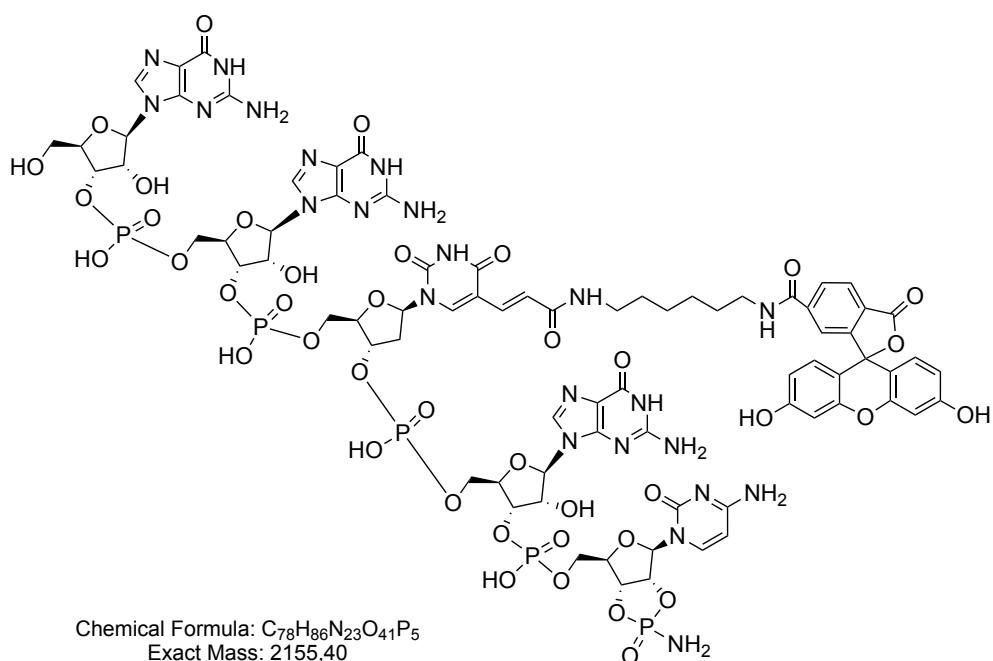

5R>p-NH<sub>2</sub>

■ Composé 8 - Tr = 15.4 min

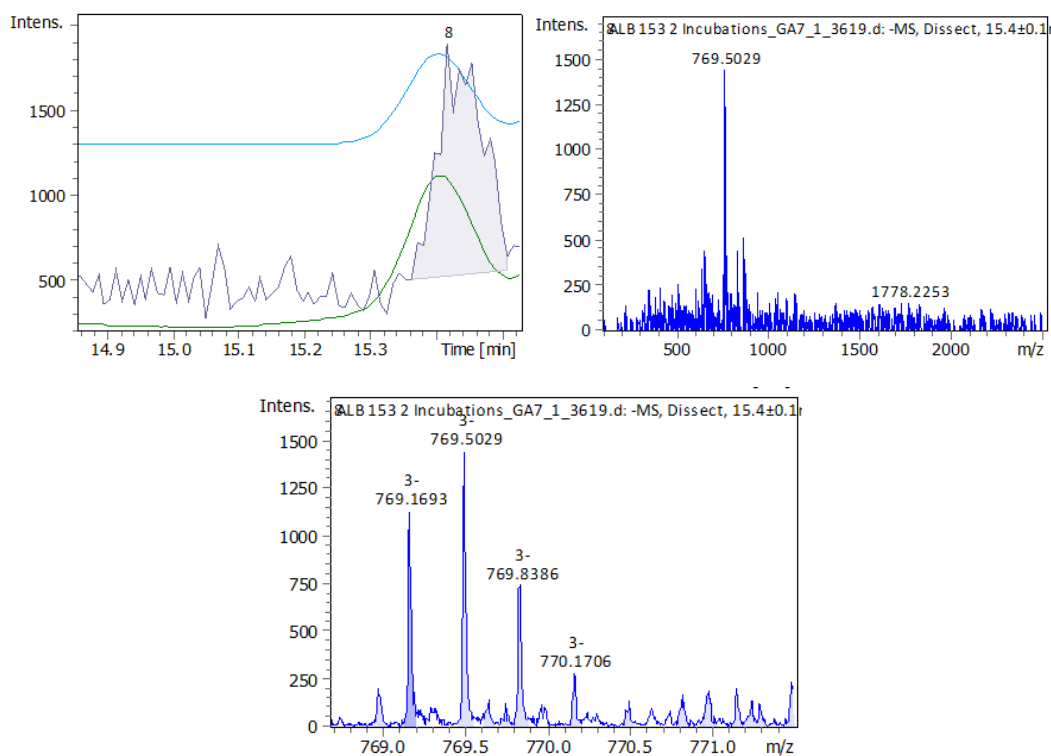

Mass observed: 2311.51

5R>p-EDC

Figure S36. LC-MS chromatogram (negative ion mode), UV chromatograms (260 and 210 nm), Ion extractions chromatograms for products of ligation, peaks and associated compounds obtained for the D3 experiment.

D4 experiment:

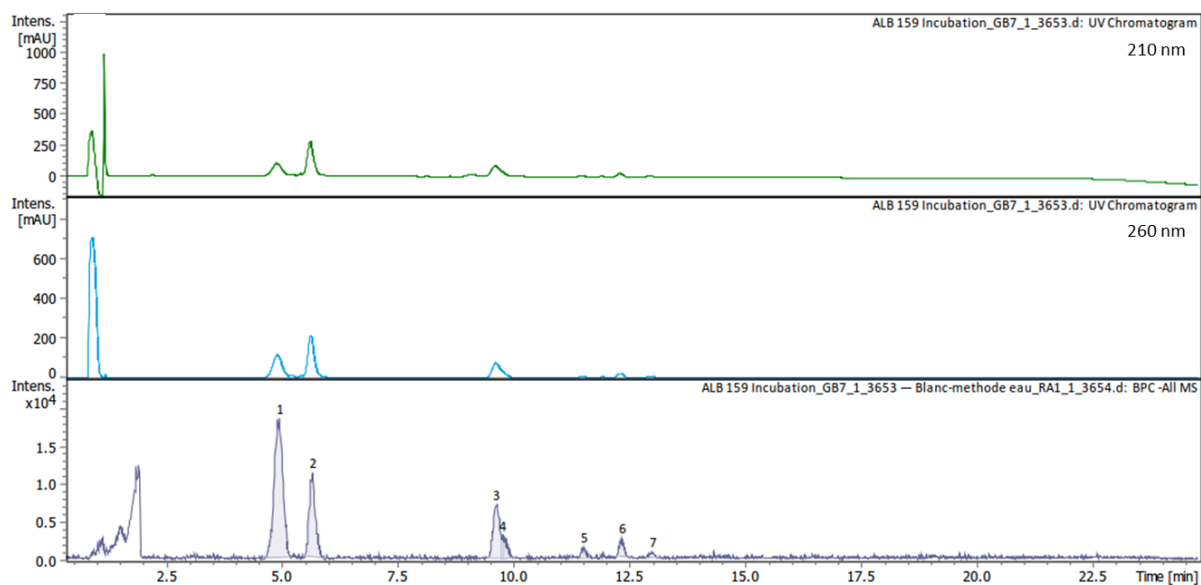

Extracted ion chromatograms for the 2 possible products of ligation:

9Rfp (red,  $C_{116}H_{133}N_{36}O_{73}P_9$ ) or 9Rf>p (blue,  $C_{116}H_{131}N_{36}O_{72}P_9$ ):

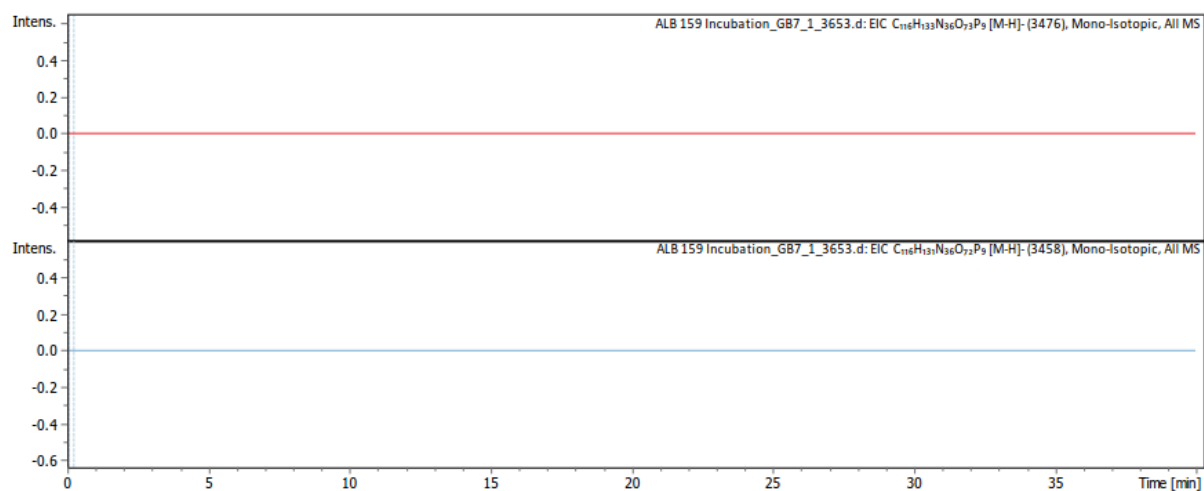

■ Composé 1 - Tr = 4.9 min

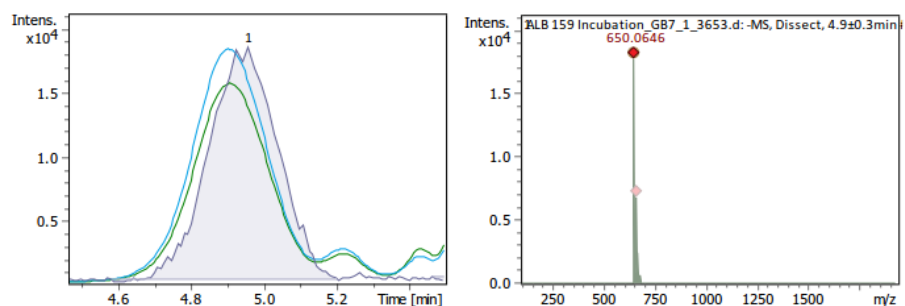

| Meas. m/z | Ion Formula                   | Sum Formula                   | m/z      | err [ppm] | mSigma | Adduct | z  |
|-----------|-------------------------------|-------------------------------|----------|-----------|--------|--------|----|
| 650.0646  | $C_{38}H_{44}N_{14}O_{30}P_4$ | $C_{38}H_{46}N_{14}O_{30}P_4$ | 650.0655 | 1.4       | 6.6    | M-H    | 2- |

→ Le spectre de masse met en évidence la présence des adduits correspondant à un produit dont la formule brute est la suivante :  $C_{38}H_{46}N_{14}O_{30}P_4$ .

4R>P

Composé 2 - Tr = 5.7 min

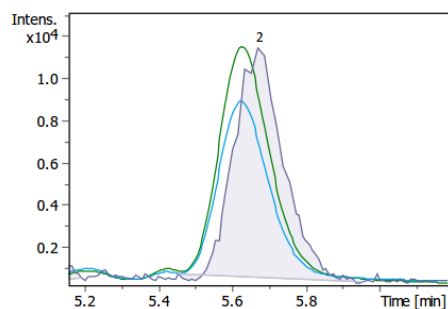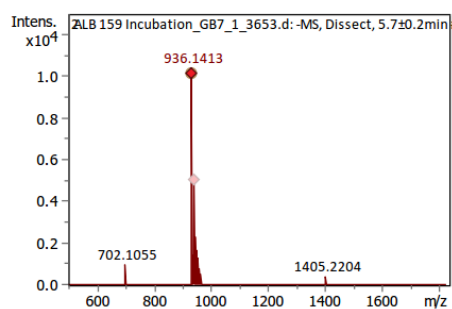

| Meas. m/z | Ion Formula     | Sum Formula     | m/z      | err [ppm] | mSigma | Adduct | z  |
|-----------|-----------------|-----------------|----------|-----------|--------|--------|----|
| 936.1413  | C85H106N35O59P8 | C85H109N35O59P8 | 936.1429 | 1.7       | 8.7    | M-H    | 3- |

→ Le spectre de masse met en évidence la présence des adduits correspondant à un produit dont la formule brute est la suivante :  $C_{85}H_{109}N_{35}O_{59}P_8$ .

## 9R

Composé 3 - Tr = 9.7 min

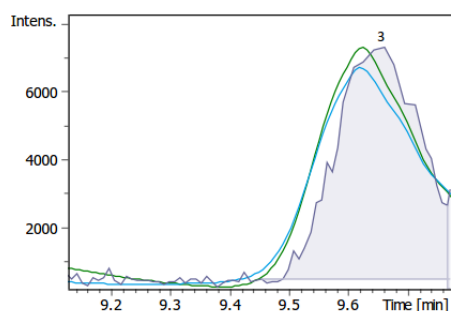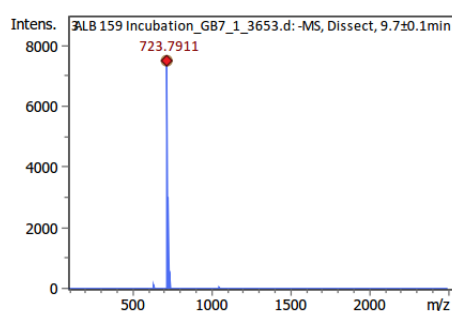

| Meas. m/z | Ion Formula    | Sum Formula    | m/z      | err [ppm] | mSigma | Adduct | z  |
|-----------|----------------|----------------|----------|-----------|--------|--------|----|
| 723.7911  | C78H84N22O43P5 | C78H87N22O43P5 | 723.7922 | 1.5       | 25.8   | M-H    | 3- |

→ Le spectre de masse met en évidence la présence des adduits correspondant à un produit dont la formule brute est la suivante :  $C_{78}H_{87}N_{22}O_{43}P_5$ .

## 5Rp

Composé 4 - Tr = 9.8 min

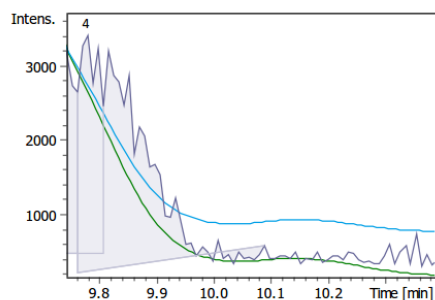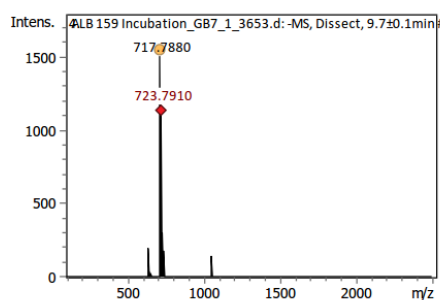

| Meas. m/z | Ion Formula    | Sum Formula    | m/z      | err [ppm] | mSigma | Adduct | z  |
|-----------|----------------|----------------|----------|-----------|--------|--------|----|
| 717.788   | C78H82N22O42P5 | C78H85N22O42P5 | 717.7887 | 1         | 32.7   | M-H    | 3- |

→ Le spectre de masse met en évidence la présence des adduits correspondant à un produit dont la formule brute est la suivante :  $C_{78}H_{85}N_{22}O_{42}P_5$ .

## 5R>p

Composé 5 - Tr = 11.5 min

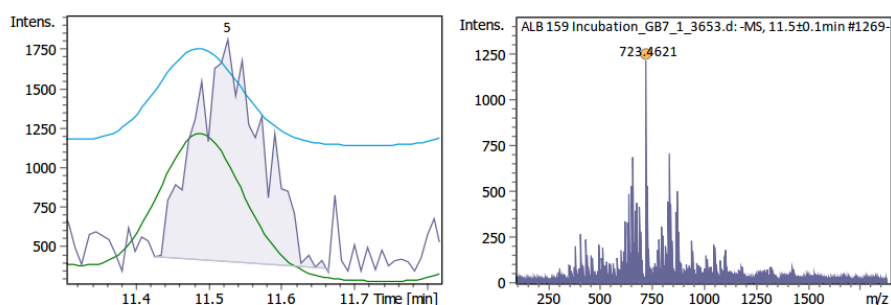

| Meas. m/z | Ion Formula    | Sum Formula    | m/z      | err [ppm] | mSigma | Adduct | z  |
|-----------|----------------|----------------|----------|-----------|--------|--------|----|
| 723.4621  | C78H85N23O42P5 | C78H88N23O42P5 | 723.4642 | 3         | 38.6   | M-H    | 3- |

→ Le spectre de masse met en évidence la présence des adduits correspondant à un produit dont la formule brute est la suivante : **C<sub>78</sub>H<sub>88</sub>N<sub>23</sub>O<sub>42</sub>P<sub>5</sub>**.

5Rp-NH<sub>2</sub>

Composé 6 - Tr = 12.3 min

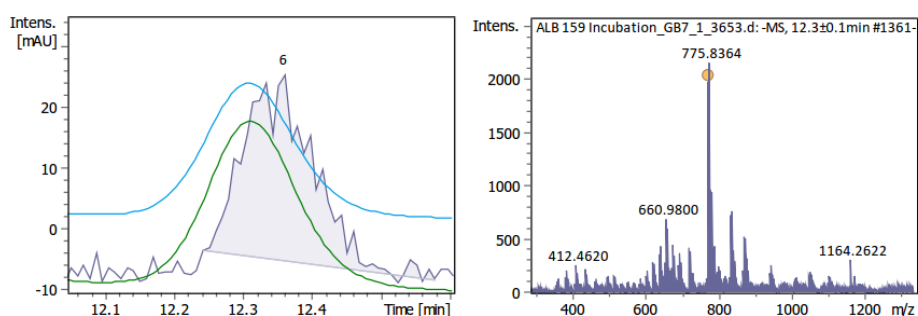

| Meas. m/z | Ion Formula     | Sum Formula     | m/z      | err [ppm] | mSigma | Adduct | z  |
|-----------|-----------------|-----------------|----------|-----------|--------|--------|----|
| 775.502   | C86H101N25O43P5 | C86H104N25O43P5 | 775.5063 | 5.6       | 22.9   | M-H    | 3- |

→ Le spectre de masse met en évidence la présence des adduits correspondant à un produit dont la formule brute est la suivante : **C<sub>86</sub>H<sub>104</sub>N<sub>25</sub>O<sub>43</sub>P<sub>5</sub>**.

5Rp-EDC

Composé 7 - Tr = 13.0 min

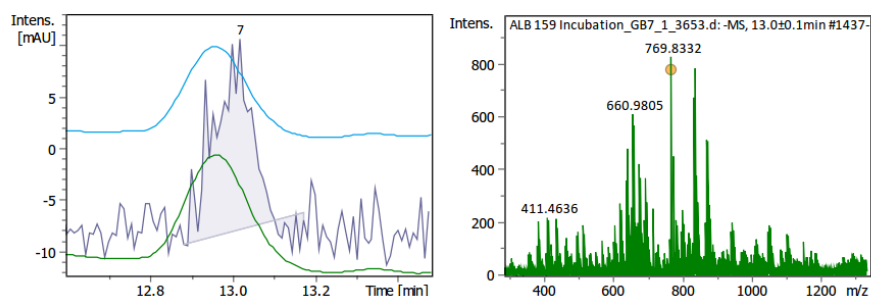

| Meas. m/z | Ion Formula    | Sum Formula     | m/z      | err [ppm] | mSigma | Adduct | z  |
|-----------|----------------|-----------------|----------|-----------|--------|--------|----|
| 769.4984  | C86H99N25O42P5 | C86H102N25O42P5 | 769.5028 | 5.7       | 29.7   | M-H    | 3- |

→ Le spectre de masse met en évidence la présence des adduits correspondant à un produit dont la formule brute est la suivante : **C<sub>86</sub>H<sub>102</sub>N<sub>25</sub>O<sub>42</sub>P<sub>5</sub>**.

5R>p-EDC

Figure S37. LC-MS chromatogram (negative ion mode), UV chromatograms (260 and 210 nm), ion extractions chromatograms for products of ligation, peaks and associated compounds obtained for the D4 experiment.

#### Prebiotic vesicles preparation in D4-like conditions:

Prebiotic vesicles were prepared as followed: A mixture of lipids containing LA, MLG, DLPA (1:1:1) was diluted in a flask in 1 mL of MeOH (5 mM total lipid concentration). The solvent was evaporated using a rotavapor and a bath at 40°C to form a thin lipid film. After dehydration overnight, the film was rehydrated overnight at room temperature with 1 mL of a buffer solution containing 100 mM NaCl pH 5.5. After hydration, the vesicles were left over for 64 h at pH 6.0 at 4°C and then 30 min at 60°C. Micrograph images were taken at each step adding 3 µM of *Nile Red*<sup>TM</sup>.

4)3) Templated ligation attempts performed in one step and vesicle production in the presence of EDC and NaCl

For the last attempts (E experiments), the templated ligations were performed in a single step:

2,500 mol equivalents of EDC (250 mM) were added to 1 equivalent of oligonucleotides involved in the ligation (4-mers and 5-mers, 50 µM) and to 0.1 equivalent of the template (9-mers, 5 µM). 100 mM NaCl was also added, the pH was brought to 6.0 and the reaction was left overnight at 25°C (E experiments). The experiment was carried out for three types of oligonucleotides: RNA only (E.R), hybrid 5-mers and 4-mers with a DNA template (E.H) and DNA only (E.D). After that, 200 µL were sampled and frozen to -80°C for further analyses. The rest was left at 5°C.

The resulting compounds were analysed using LC-MS as detailed previously for the other ligation attempts. Once again, out of all EDC derivatives found the structure of only one of several possible isomers is shown (Figs. S38-S40).



## E.R experiment (21h):

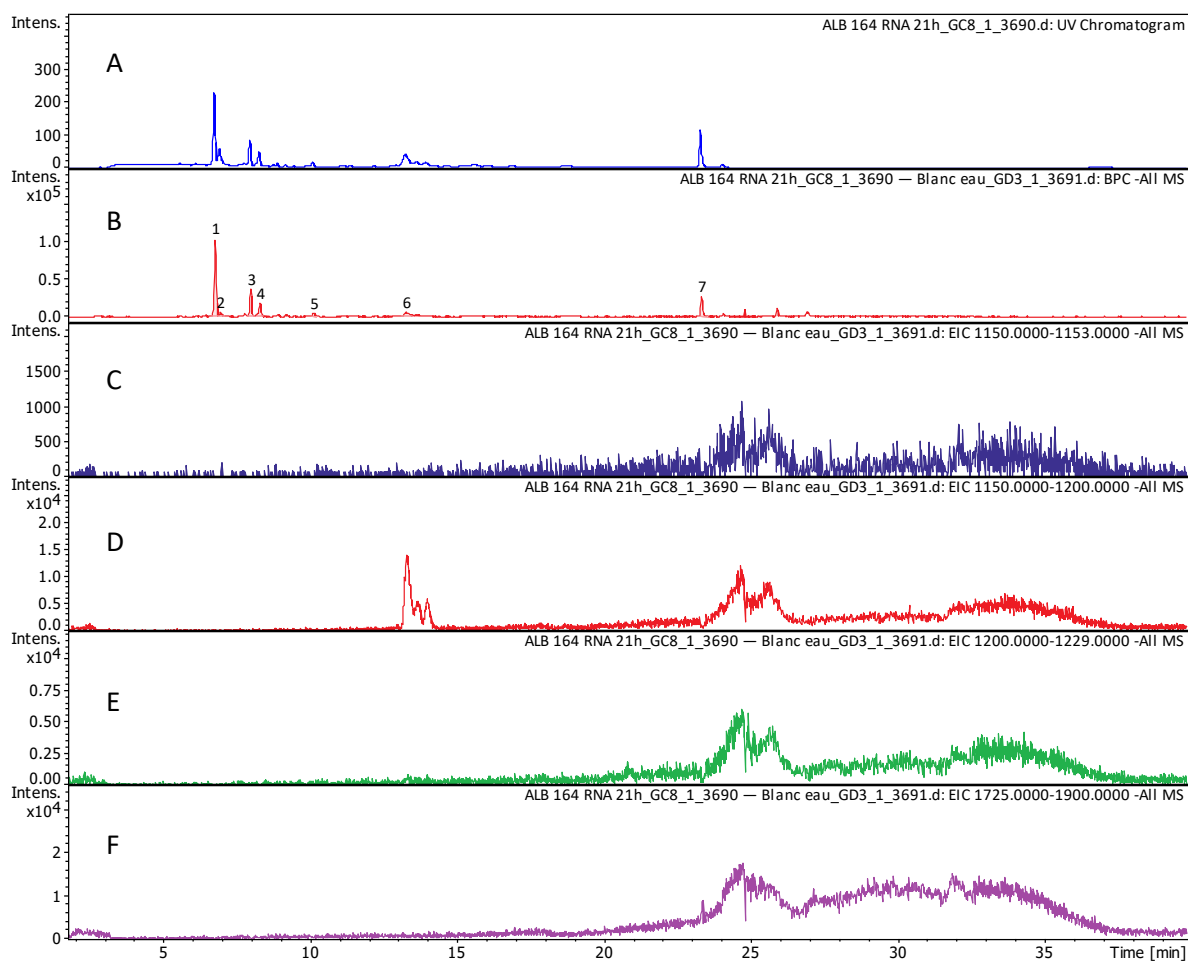

■ Composé 1 - Tr = 6.8 min

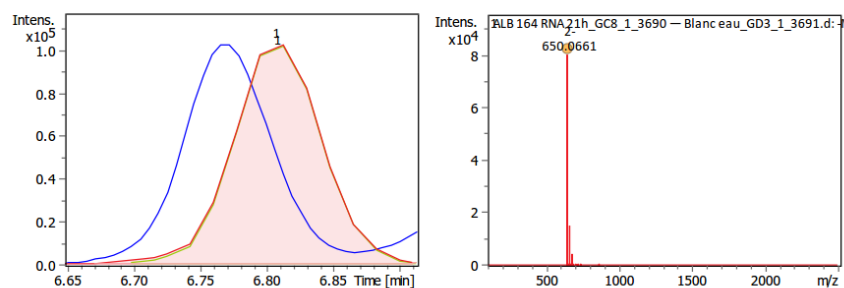

| Meas. m/z | Ion Formula    | Sum Formula    | m/z      | err [ppm] | mSigma | Adduct | z  |
|-----------|----------------|----------------|----------|-----------|--------|--------|----|
| 650.0661  | C38H44N14O30P4 | C38H46N14O30P4 | 650.0655 | -1        | 26.1   | M-H    | 2- |

→ Le spectre de masse met en évidence la présence des adduits correspondant à un produit dont la formule brute est la suivante :  $\text{C}_{38}\text{H}_{46}\text{N}_{14}\text{O}_{30}\text{P}_4$ .

4R>p

Composé 2 - Tr = 7.0 min

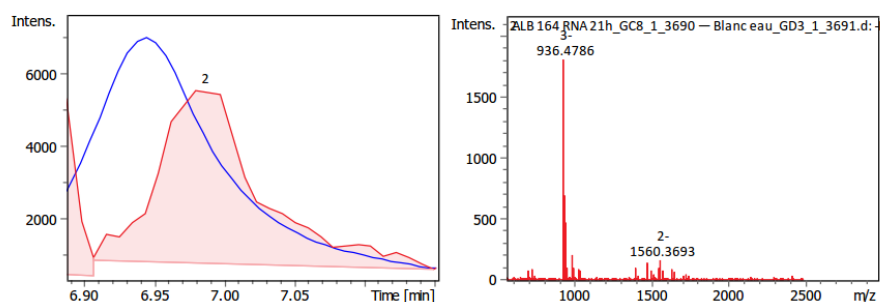

| Meas. m/z | Ion Formula     | Sum Formula     | m/z      | err [ppm] | mSigma | Adduct | z  |
|-----------|-----------------|-----------------|----------|-----------|--------|--------|----|
| 936.1454  | C85H106N35O59P8 | C85H109N35O59P8 | 936.1429 | -2.6      | 33.6   | M-H    | 3- |

→ Le spectre de masse met en évidence la présence des adduits correspondant à un produit dont la formule brute est la suivante : **C<sub>85</sub>H<sub>109</sub>N<sub>35</sub>O<sub>59</sub>P<sub>8</sub>**.

9R

Composé 3 - Tr = 8.0 min

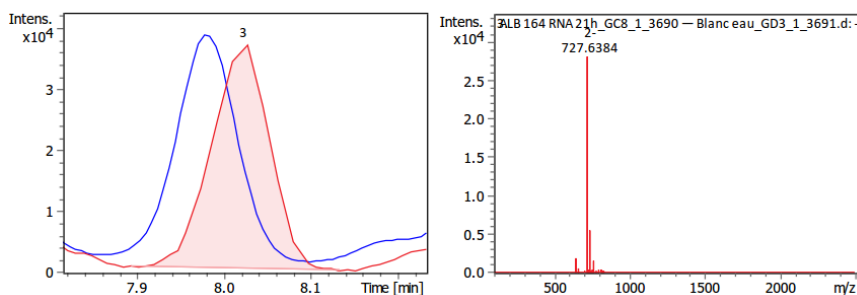

Mass observed: 1457.28

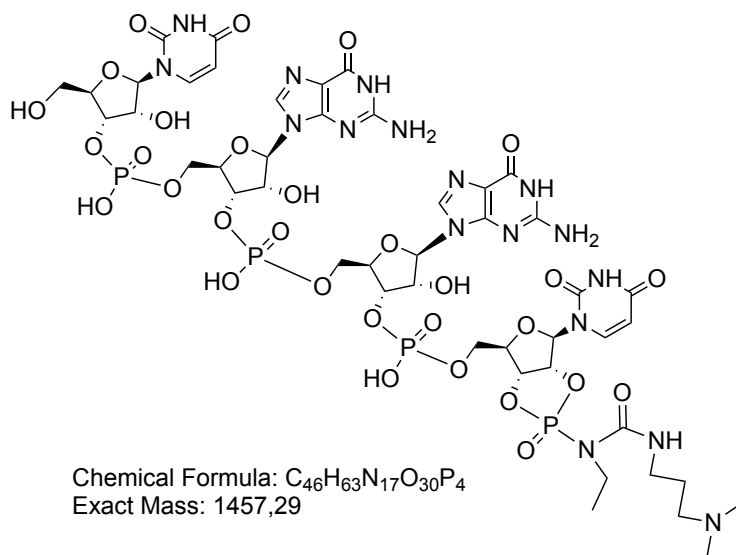

4R>p-EDC

Composé 4 - Tr = 8.3 min

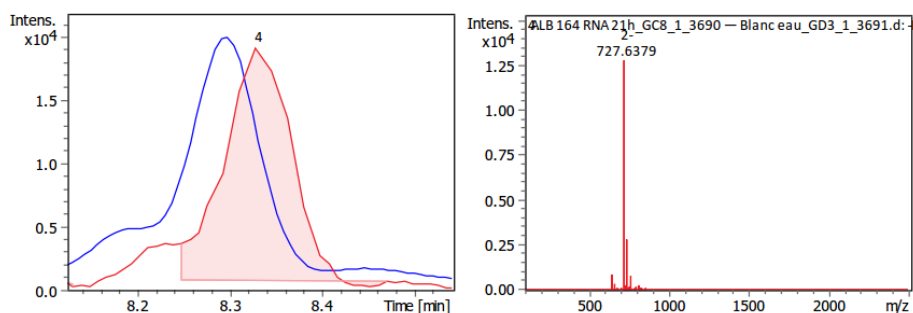

Mass observed: 1457.28

4R>p-EDC

Composé 5 - Tr = 10.2 min

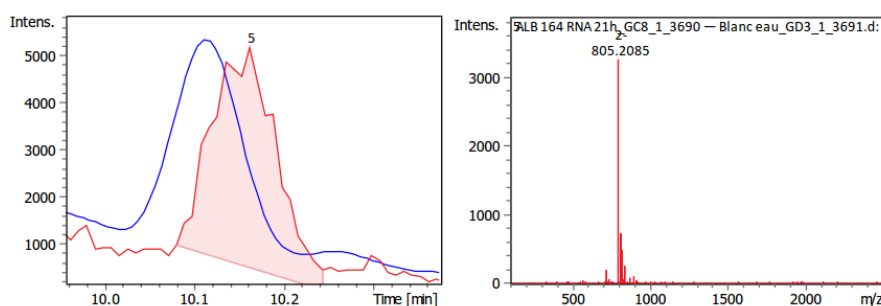

Mass observed: 1612.42

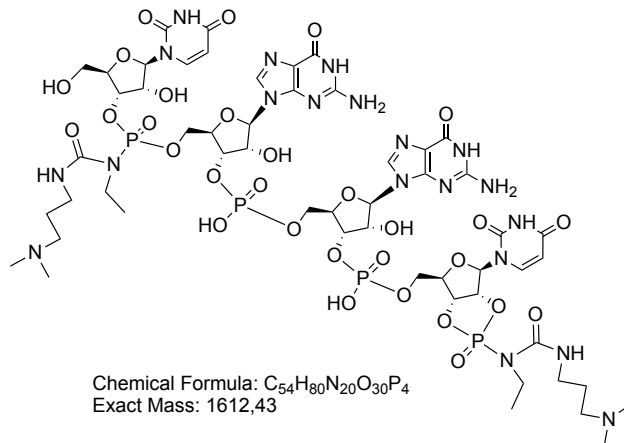

4R>p-EDC-EDC

Composé 6 - Tr = 13.3 min

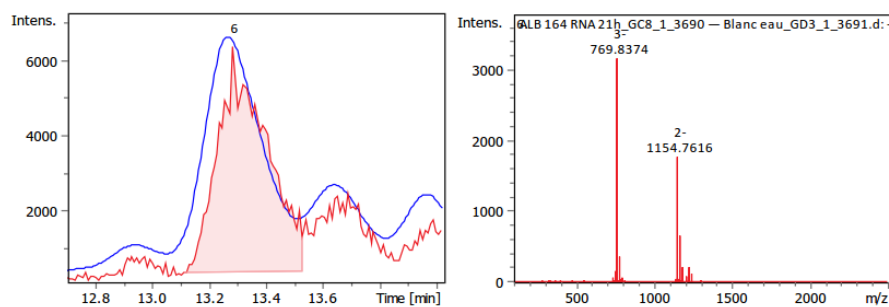

Mass observed: 2312.51 and 2311.5232

Unidentified derivative and 5R>p-EDC

Composé 7 - Tr = 23.4 min

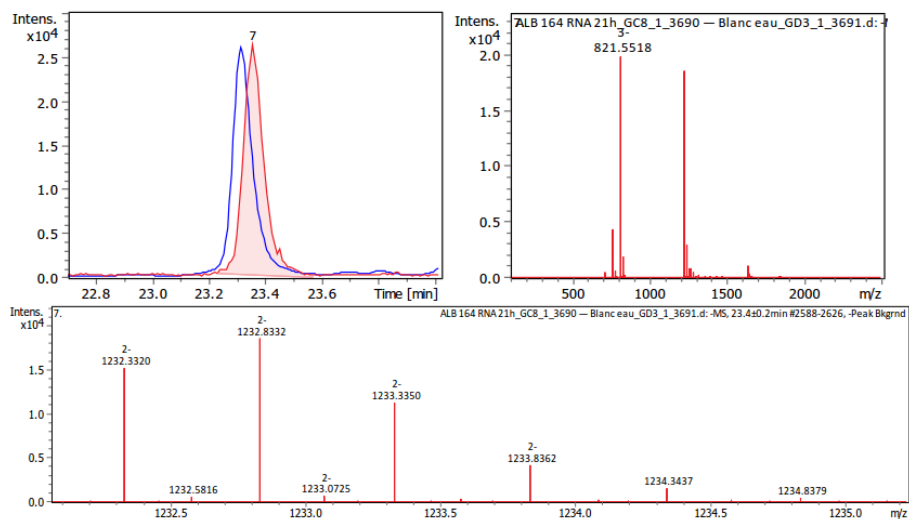

Mass observed: 2467.66 and 2466.67

Unidentified derivative and

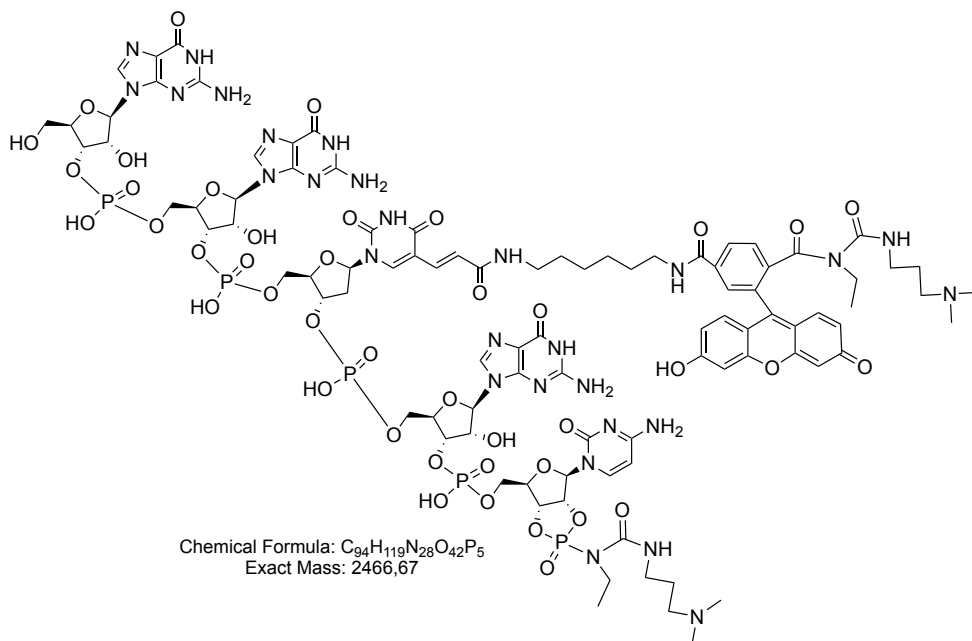

5R>p-EDC-EDC

Figure S38. E.R experiment after 21 hours of incubation at ambient temperature. A) UV chromatogram (260 nm), B) all-negative-ion LC-MS chromatogram (main peaks annotated 1-7), C-F) extracted ion chromatograms (EIC) for mass ranges of the possible products of ligation targeting C:  $[9Rf>p]^{3-}$ , D:  $[9Rf>p]^{3-}$  and  $[9Rfp]^{3-}$  (found in peak 6:  $[5R>p-EDC]^{2-}$  and 2 unidentified  $[U]^{2-}$ ), E:  $[9Rf>p-EDC]^{3-}$  and  $[9Rfp-EDC]^{3-}$ , F:  $[9Rf>p]^{2-}$ ,  $[9Rfp]^{2-}$ ,  $[9Rf>p-EDC]^{2-}$ ,  $[9Rfp-EDC]^{2-}$  and  $[9Rfp-EDC-EDC]^{2-}$  found in peak 7:  $[5R>p-EDC-EDC]^{2-}$ , followed by mass spectra of the annotated peaks, their molecular masses (1-7) and identified compounds (only one isomer shown).

# E.H experiment (21h):

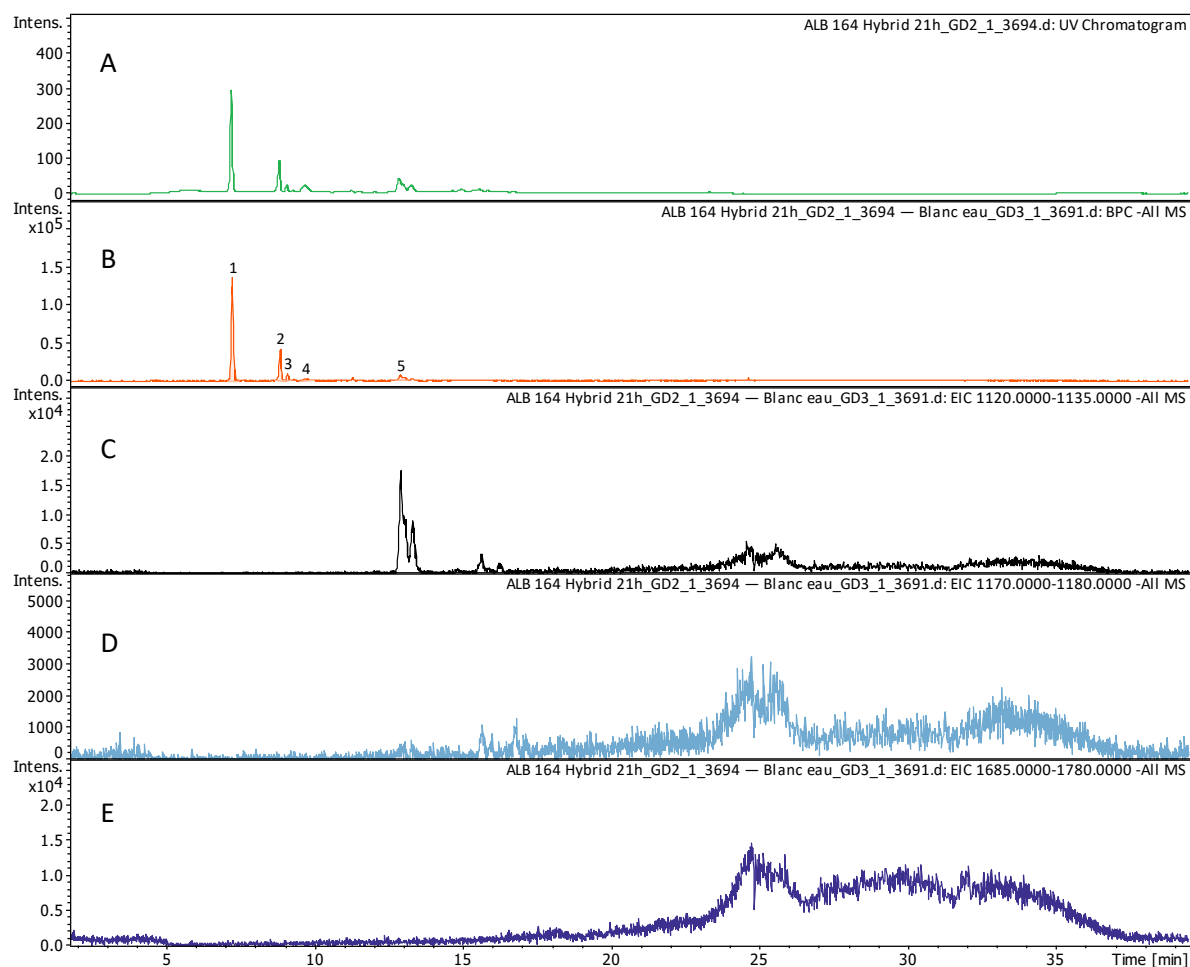

Composé 1 - Tr = 7.3 min

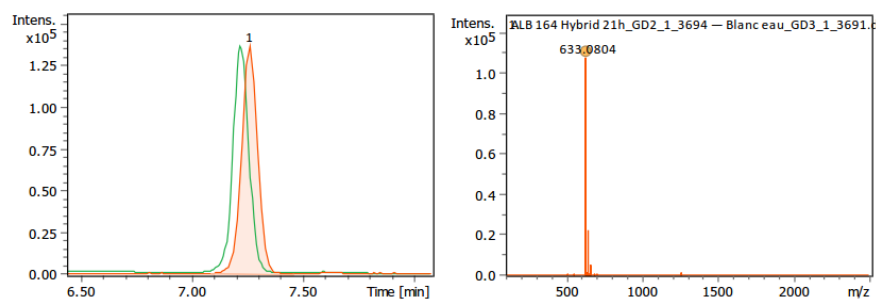

| Meas. m/z | Ion Formula    | Sum Formula    | m/z      | err [ppm] | mSigma | Adduct | z  |
|-----------|----------------|----------------|----------|-----------|--------|--------|----|
| 633.0804  | C39H46N14O27P4 | C39H48N14O27P4 | 633.0809 | 0.9       | 19.5   | M-H    | 2- |

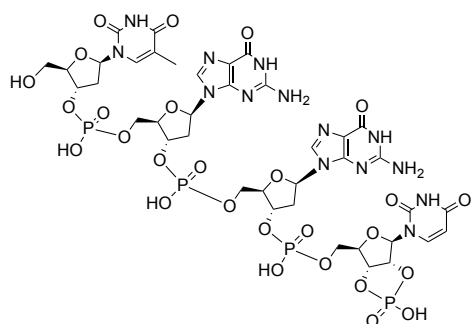

Chemical Formula: C<sub>39</sub>H<sub>48</sub>N<sub>14</sub>O<sub>27</sub>P<sub>4</sub>  
Exact Mass: 1268,18

4H>p

Composé 2 - Tr = 8.9 min

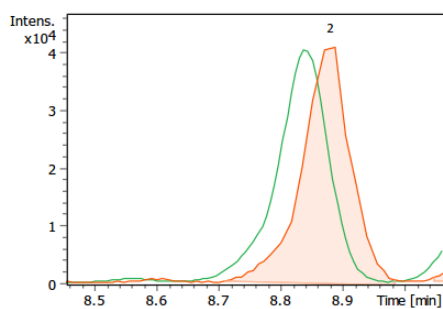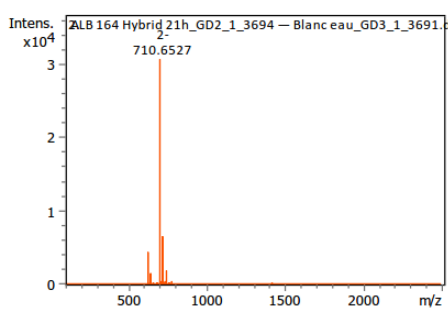

Mass observed: 1423.31

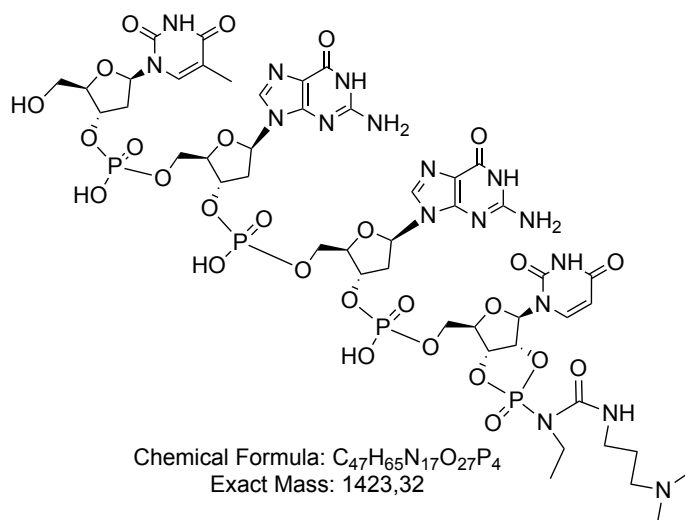

4H>p-EDC

Composé 3 - Tr = 9.1 min

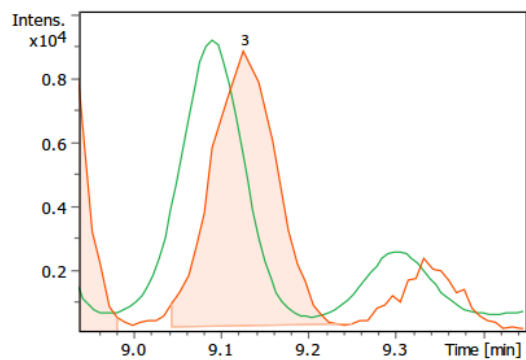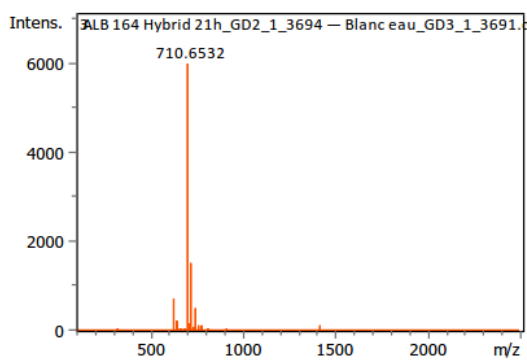

Mass observed: 1423.31

4H>p-EDC

■ Composé 4 - Tr = 9.7 min

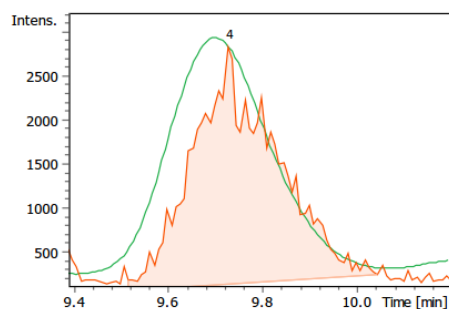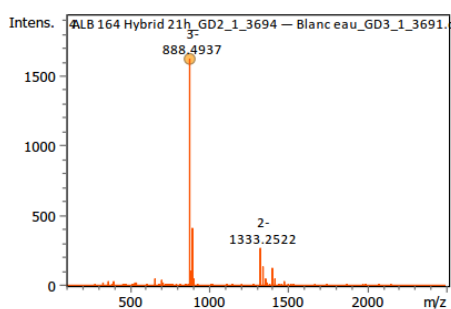

| Meas. m/z | Ion Formula                                                                     | Sum Formula                                                                     | m/z      | err [ppm] | mSigma | Adduct | z  |
|-----------|---------------------------------------------------------------------------------|---------------------------------------------------------------------------------|----------|-----------|--------|--------|----|
| 888.1598  | C <sub>85</sub> H <sub>106</sub> N <sub>35</sub> O <sub>50</sub> P <sub>8</sub> | C <sub>85</sub> H <sub>109</sub> N <sub>35</sub> O <sub>50</sub> P <sub>8</sub> | 888.1582 | -1.8      | 39.2   | M-H    | 3- |

→ Le spectre de masse met en évidence la présence des adduits correspondant à un produit dont la formule brute est la suivante : **C<sub>85</sub>H<sub>109</sub>N<sub>35</sub>O<sub>50</sub>P<sub>8</sub>**.

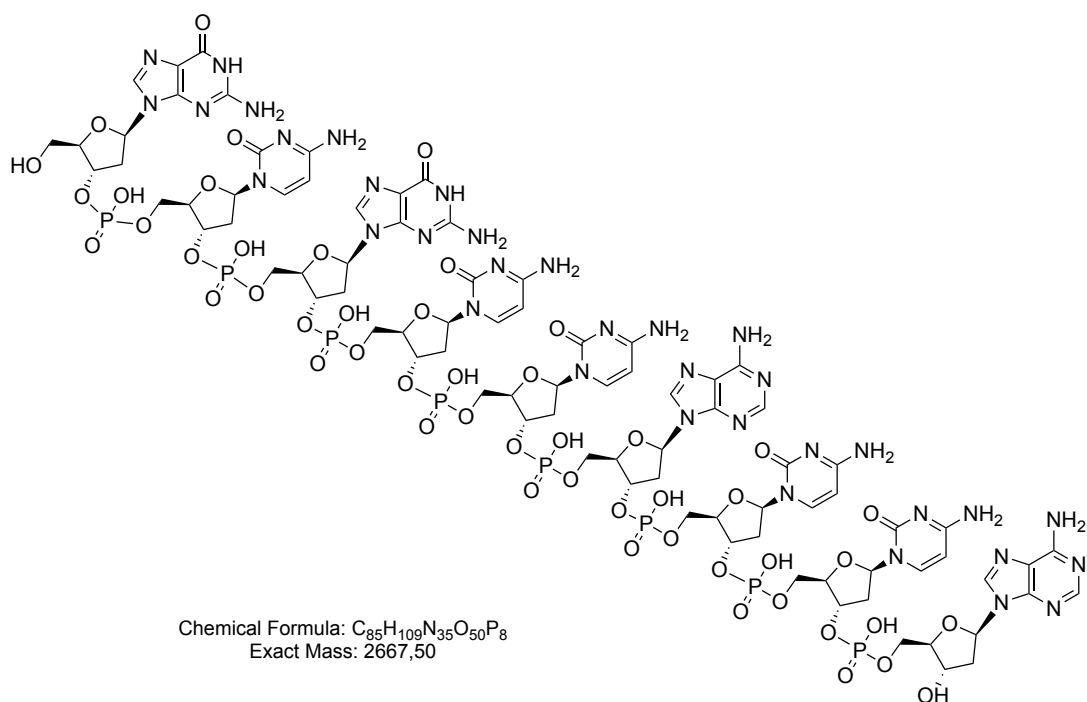

9D

■ Composé 5 - Tr = 12.9min

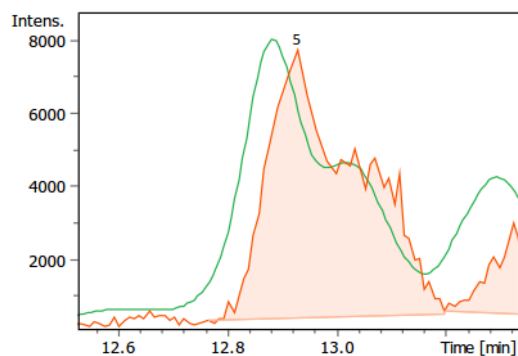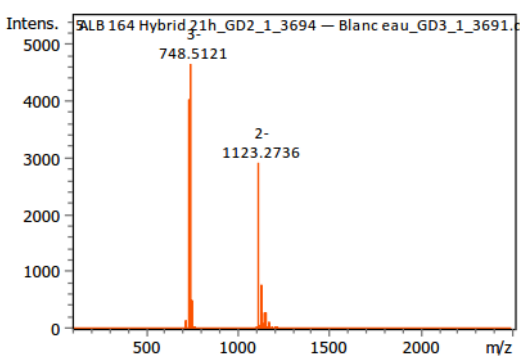

Masses observed: 2247.54 and 2248.55

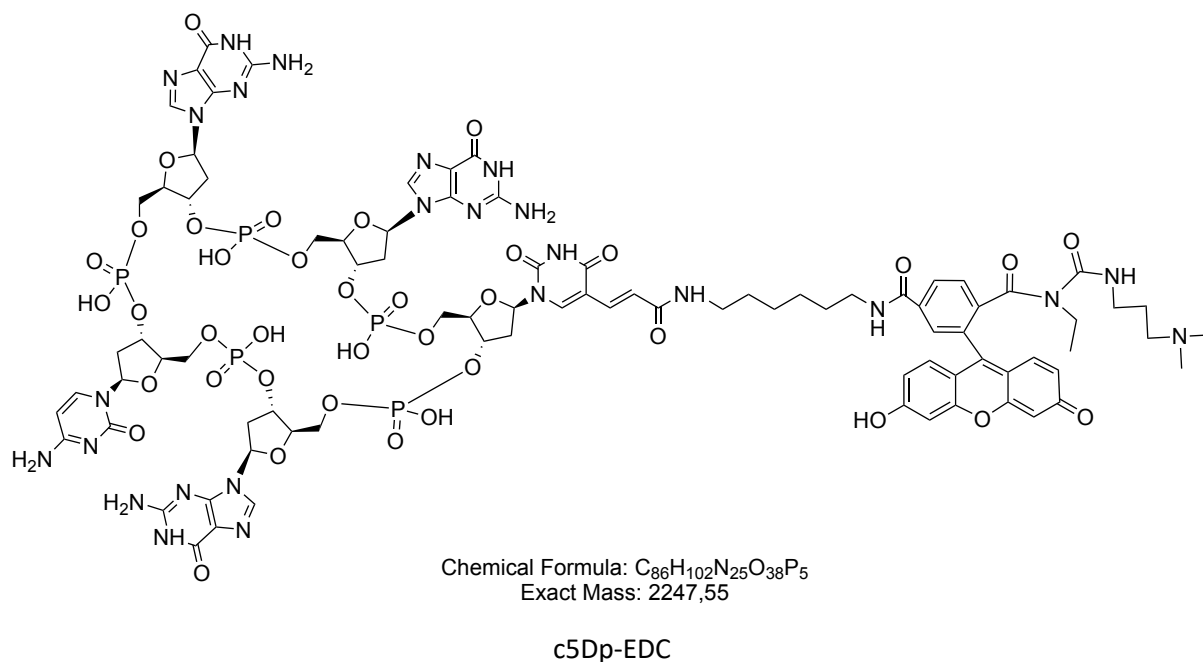

Figure S39. E.H experiment after 21 hours of incubation at ambient temperature. A) UV chromatogram (260 nm), B) all-negative-ion LC-MS chromatogram (main peaks annotated 1-5), C-E) extracted ion chromatograms (EIC) for mass ranges of the possible products of ligation targeting C:  $[9Hf>p]^{3-}$  and  $[9Hfp]^{3-}$  (found in peak 5:  $[c5Dp-EDC]^{2-}$ , 13-17 min. several unidentified  $[UI]^{2-}$ ), D:  $[9Hf>p-EDC]^{2-}$  and  $[9Hfp-EDC]^{2-}$ , E:  $[9Hf>p]^{2-}$ ,  $[9Hfp]^{2-}$ ,  $[9Hf>p-EDC]^{2-}$ ,  $[9Hfp-EDC]^{2-}$  and  $[9Hfp-EDC-EDC]^{2-}$ , followed by mass spectra of the annotated peaks, their molecular masses (1-5) and identified compounds (only one isomer shown).



## E.D experiment (21h):

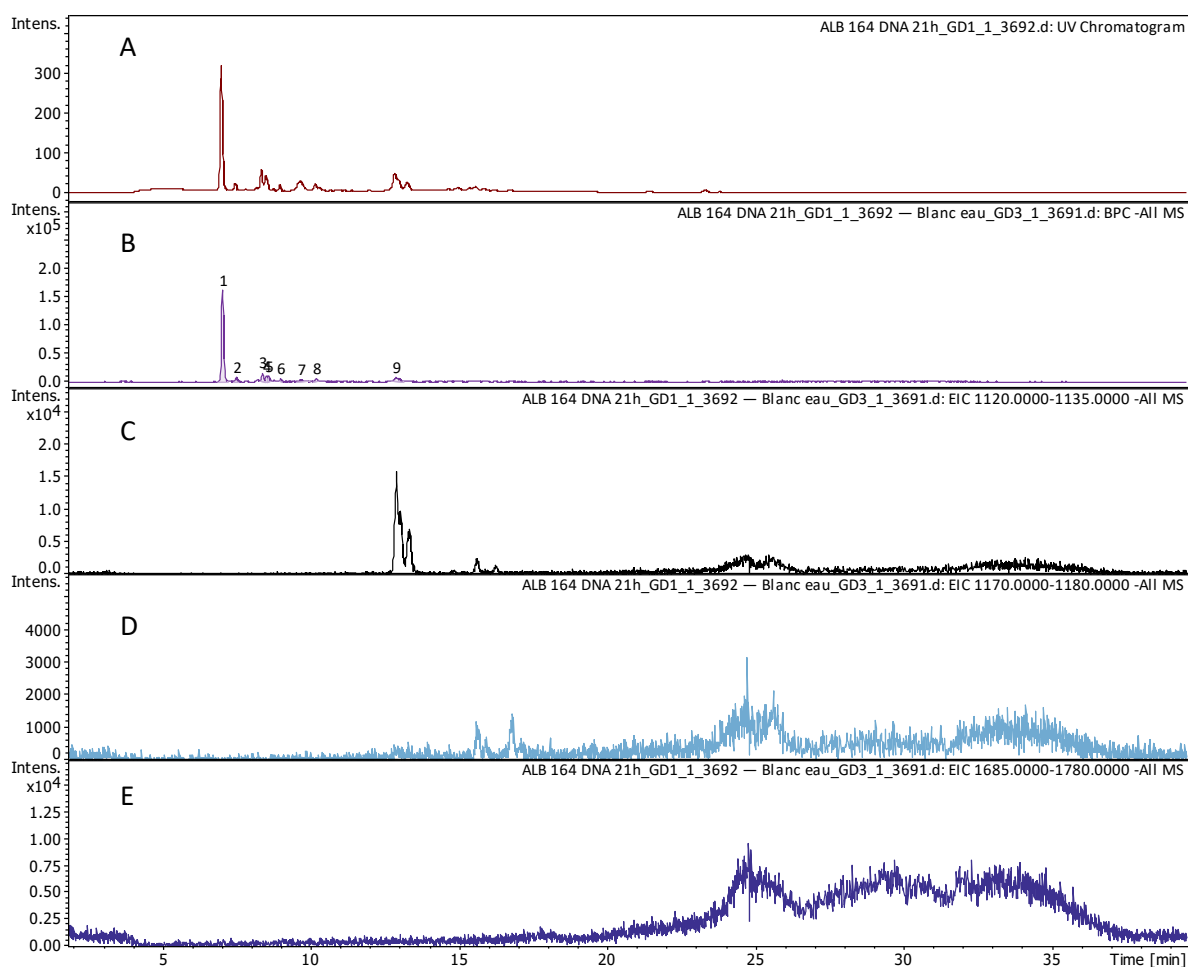

### Composé 1 - Tr = 7.1 min

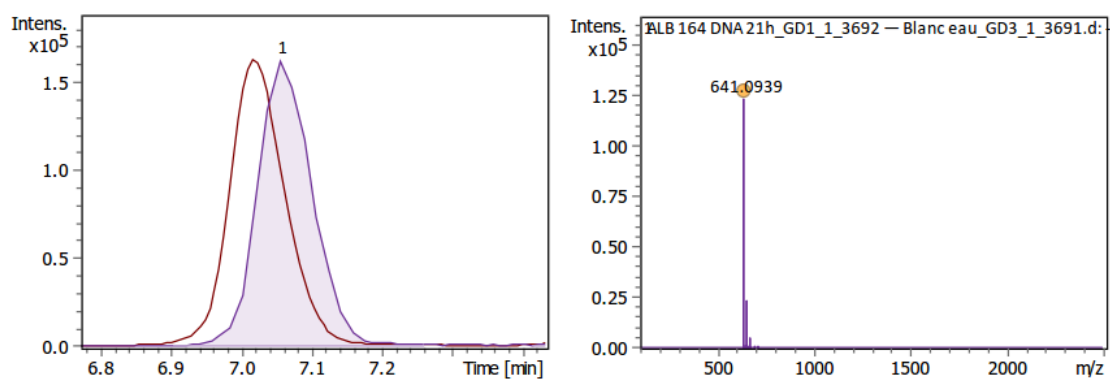

| Meas. m/z | Ion Formula    | Sum Formula    | m/z      | err [ppm] | mSigma | Adduct | z  |
|-----------|----------------|----------------|----------|-----------|--------|--------|----|
| 641.0939  | C40H50N14O27P4 | C40H52N14O27P4 | 641.0966 | 4.1       | 27.1   | M-H    | 2- |

→ Le spectre de masse met en évidence la présence des adduits correspondant à un produit dont la formule brute est la suivante : **C<sub>40</sub>H<sub>52</sub>N<sub>14</sub>O<sub>27</sub>P<sub>4</sub>**.

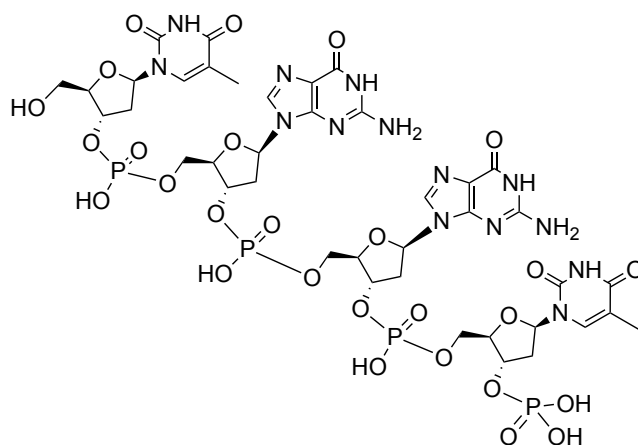

Chemical Formula:  $C_{40}H_{52}N_{14}O_{27}P_4$   
Exact Mass: 1284.21

4Dp

Composé 2 - Tr = 7.5 min

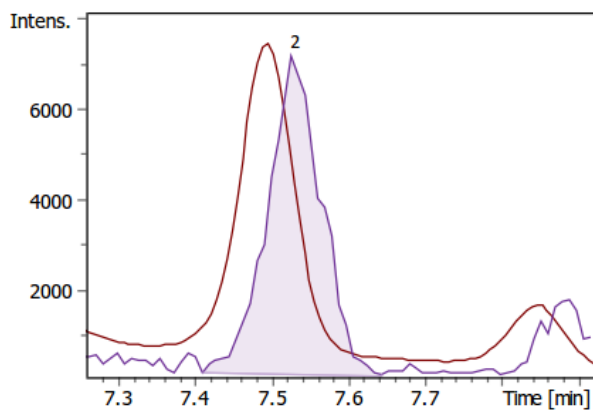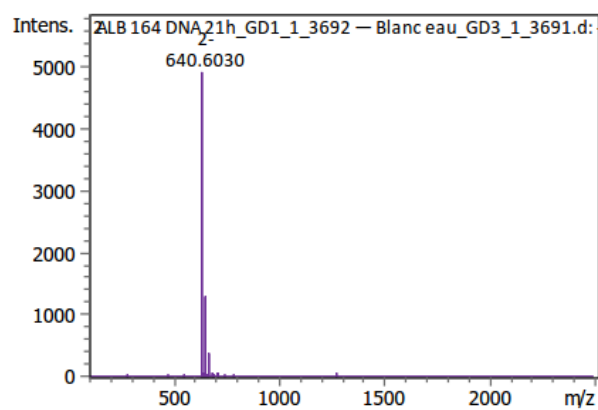

Mass observed: 1283.21

Unidentified derivative

Composé 3 - Tr = 8.4 min

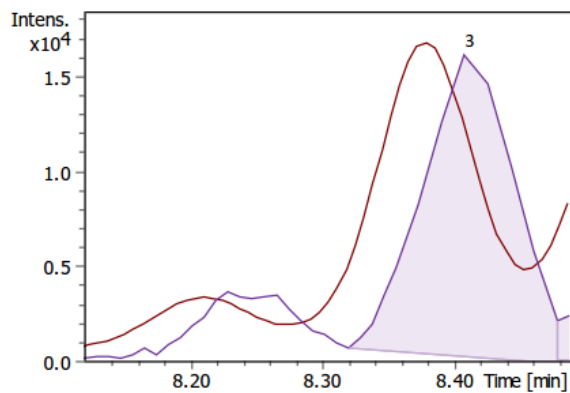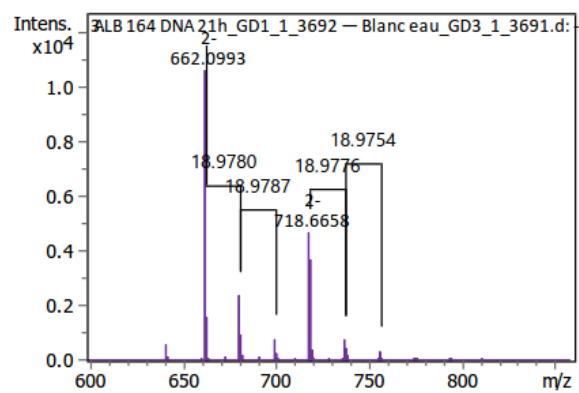

Mass observed: 1326.20

Unidentified derivative

■ Composé 4 - Tr = 8.5 min

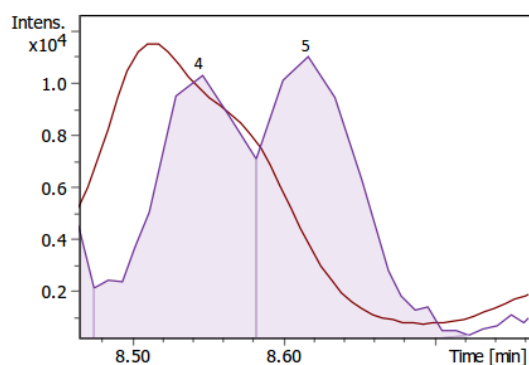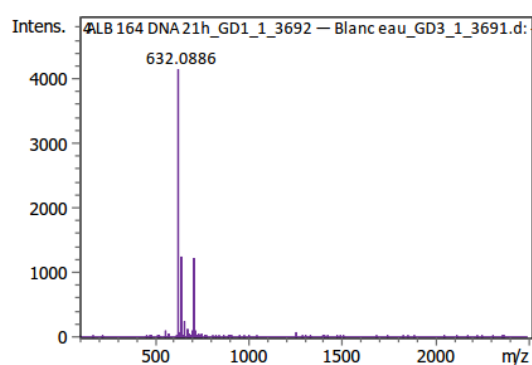

Mass observed: 1266.18

Unidentified derivative

■ Composé 5 - Tr = 8.6 min

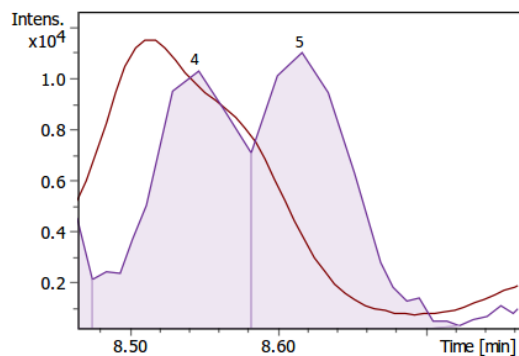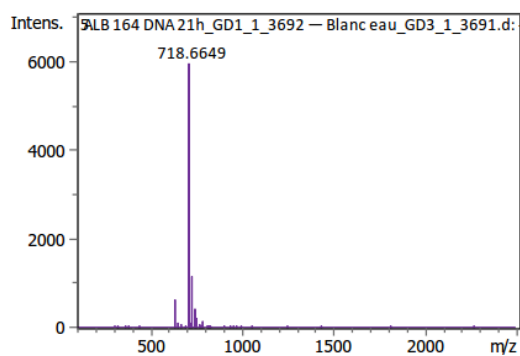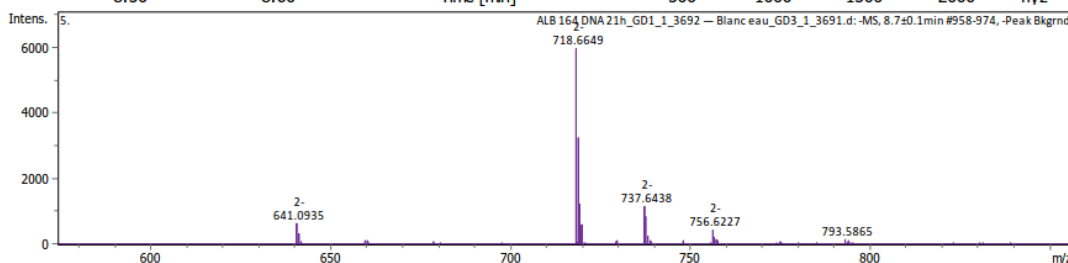

Mass observed: 1439.33

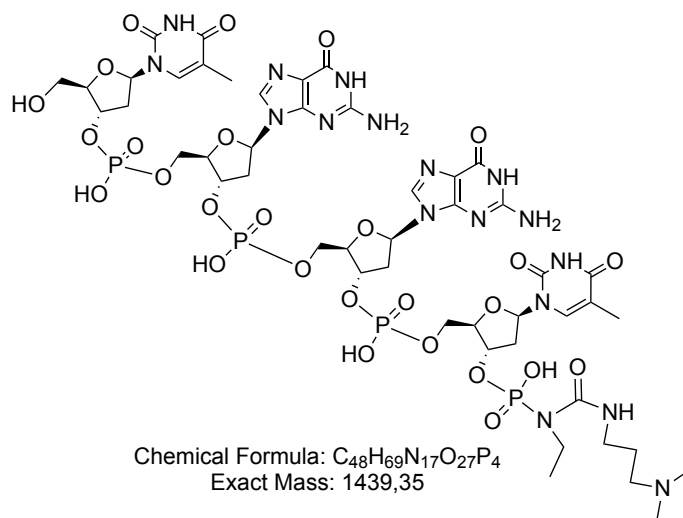

4Dp-EDC

■ Composé 6 - Tr = 9.0 min

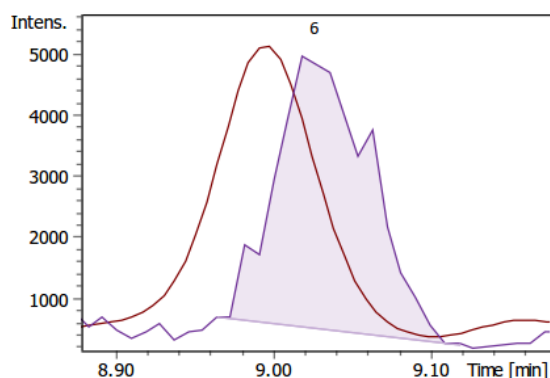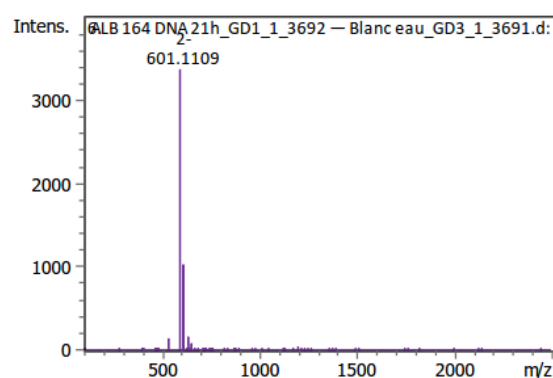

Mass observed: 1204.22

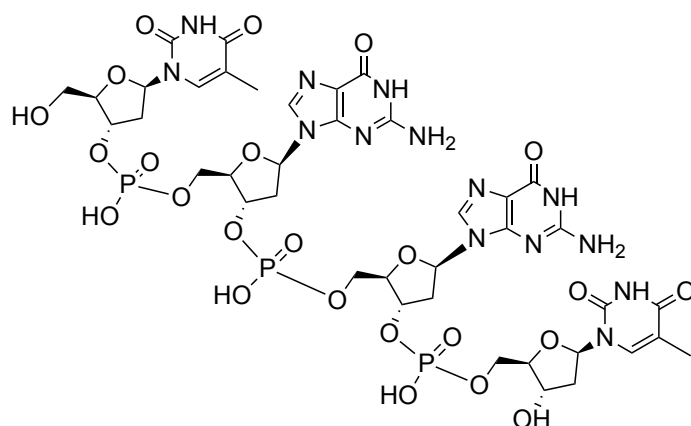

Chemical Formula:  $C_{40}H_{51}N_{14}O_{24}P_3$   
Exact Mass: 1204,24

4D

■ Composé 7 - Tr = 9.7 min

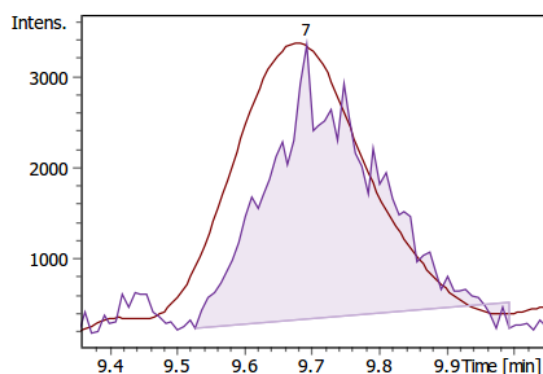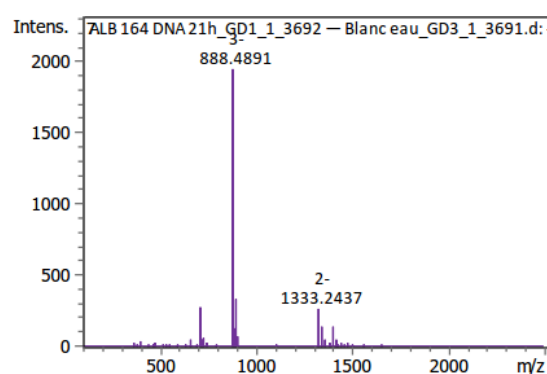

| Meas. m/z | Ion Formula     | Sum Formula     | m/z      | err [ppm] | mSigma | Adduct | z  |
|-----------|-----------------|-----------------|----------|-----------|--------|--------|----|
| 888.1546  | C85H106N35O50P8 | C85H109N35O50P8 | 888.1582 | 4.1       | 25     | M-H    | 3- |

→ Le spectre de masse met en évidence la présence des adduits correspondant à un produit dont la formule brute est la suivante :  $C_{85}H_{109}N_{35}O_{50}P_8$ .

9D

■ Composé 8 - Tr = 10.2 min

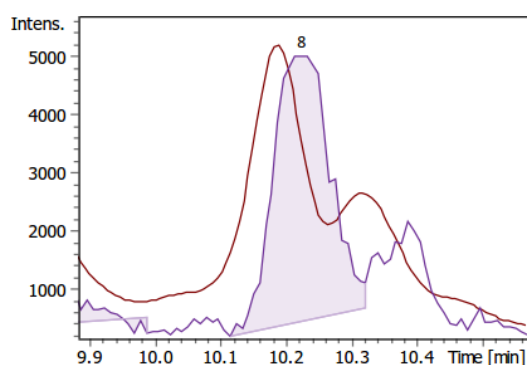

Mass observed: 1266.16

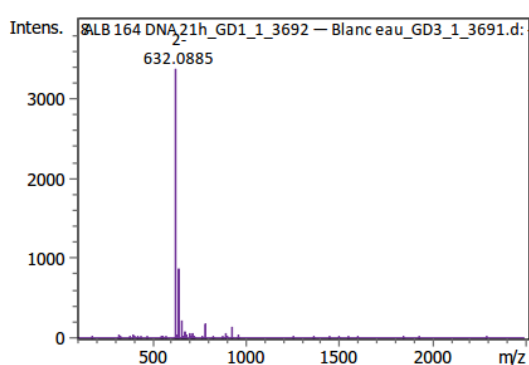

Unidentified derivative

■ Composé 9 - Tr = 12.9 min

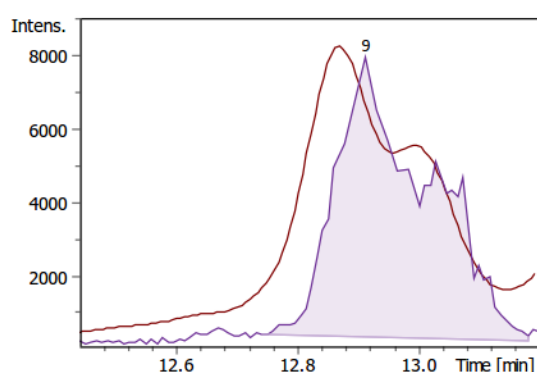

Masses observed: 2248.52 and 2247.53

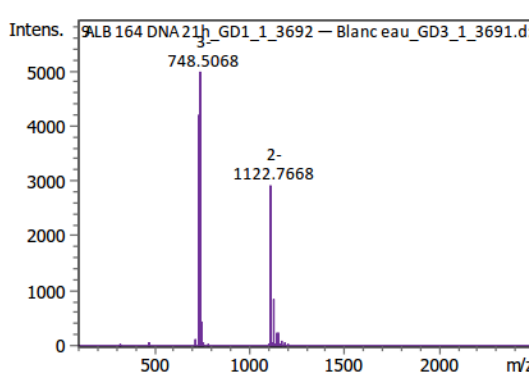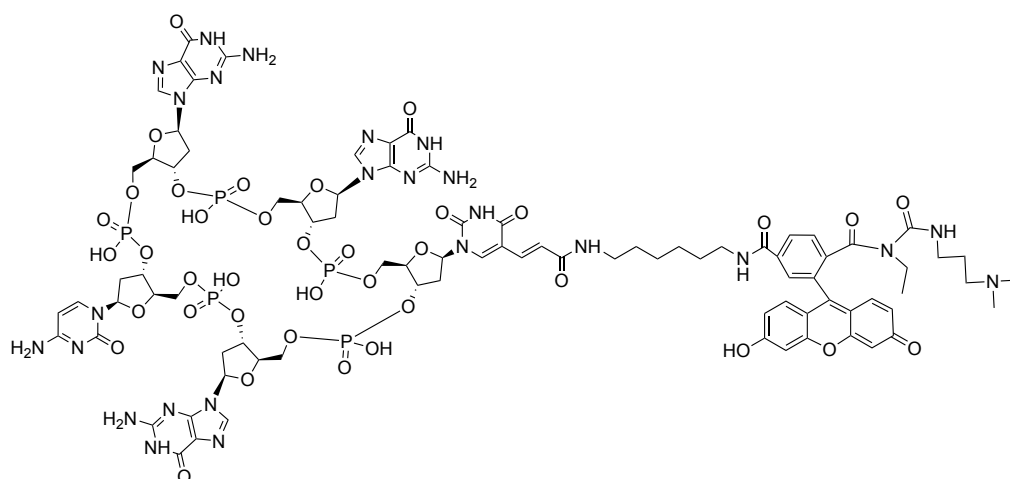

Chemical Formula:  $C_{86}H_{102}N_{25}O_{38}P_5$   
Exact Mass: 2247.55

Unidentified derivative and c5Dp-EDC

Figure S40. E.D experiment after 21 hours of incubation at ambient temperature. A) UV chromatogram (260 nm), B) all-negative-ion LC-MS chromatogram (main peaks annotated 1-9), C-E) extracted ion chromatograms (EIC) for mass ranges of the possible products of ligation targeting C: [9Df>p]<sup>3-</sup> and [9Dfp]<sup>3-</sup> (found in peak 9: [c5Dp-EDC]<sup>2-</sup>, 13-17 min. several unidentified [UI]<sup>2-</sup>), D: [9Df>p-EDC]<sup>2-</sup> and [9Dfp-EDC]<sup>2-</sup>, E: [9Df>p]<sup>2-</sup>, [9Dfp]<sup>2-</sup>, [9Df>p-EDC]<sup>2-</sup>, [9Dfp-EDC]<sup>2-</sup> and [9Dfp-EDC-EDC]<sup>2-</sup>, followed by mass spectra of the annotated peaks, their molecular masses (1-9) and identified compounds (only one isomer shown).

# E.R experiment (10 months):

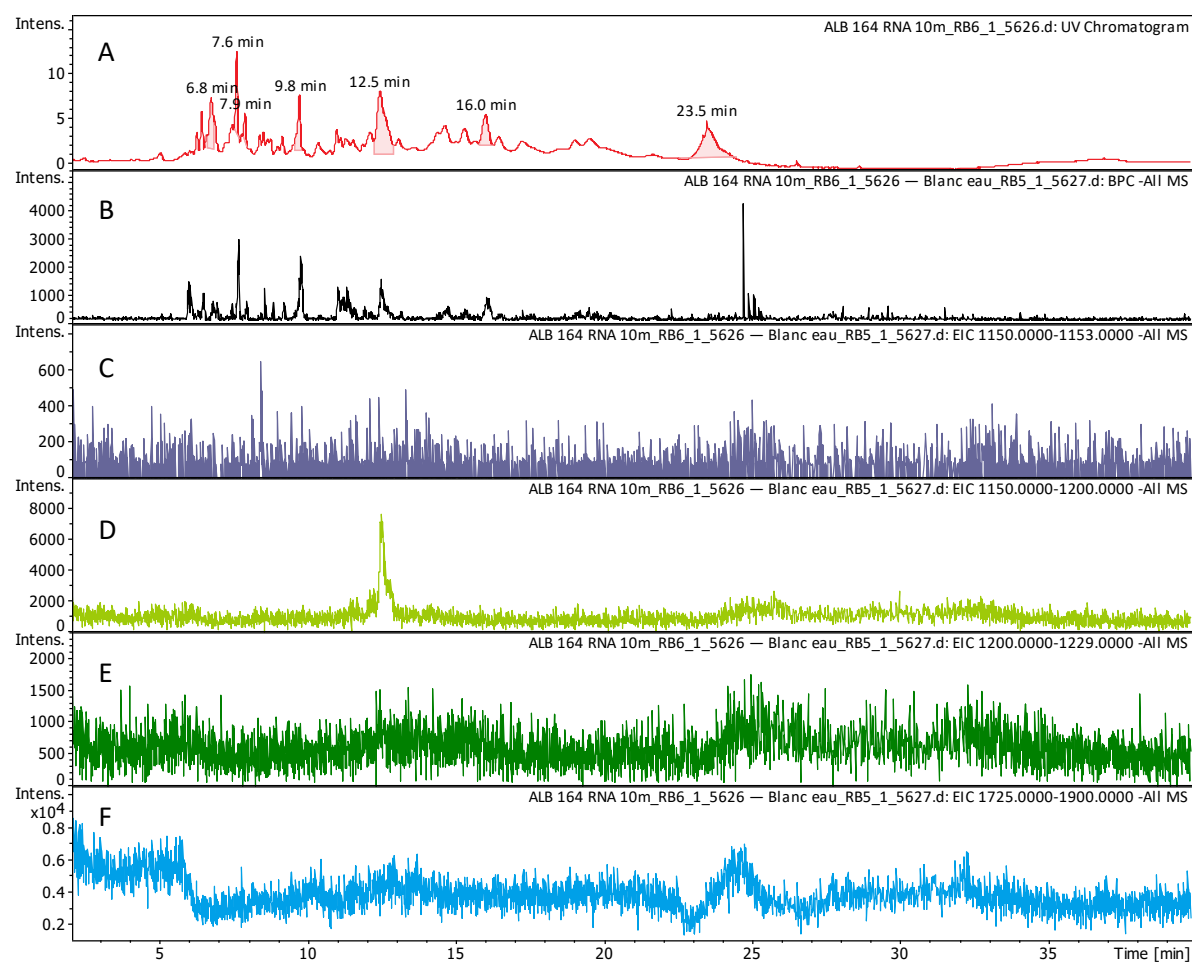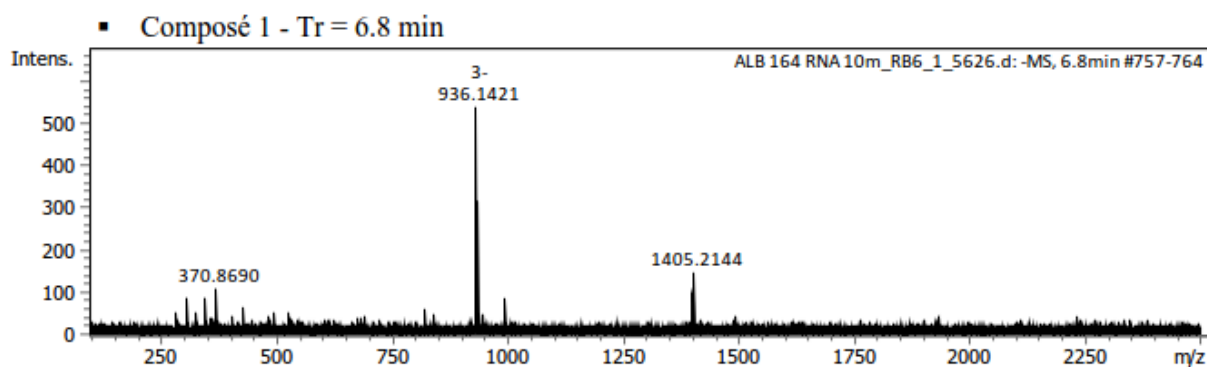

Mass observed: 2811.43

9R

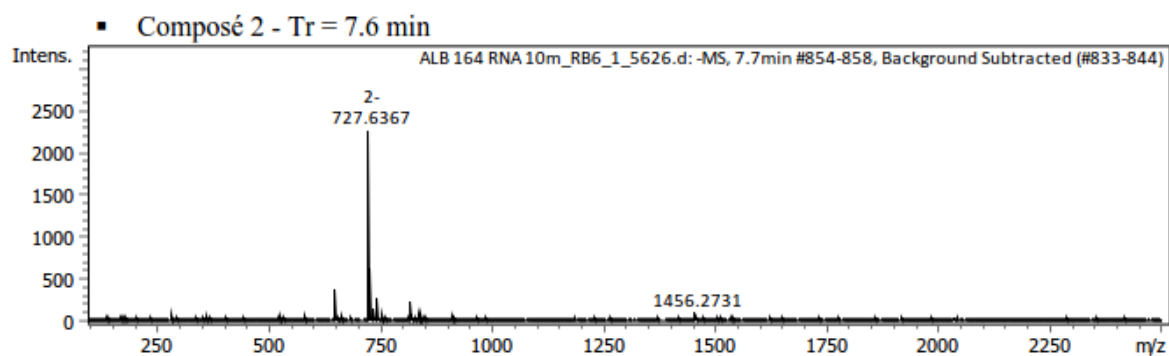

Mass observed: 1457.27

4R>p-EDC

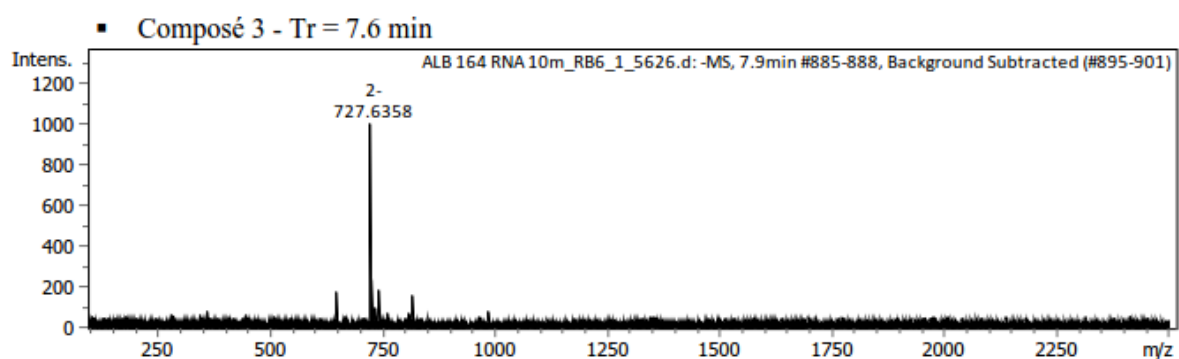

Mass observed: 1457.27

4R>p-EDC

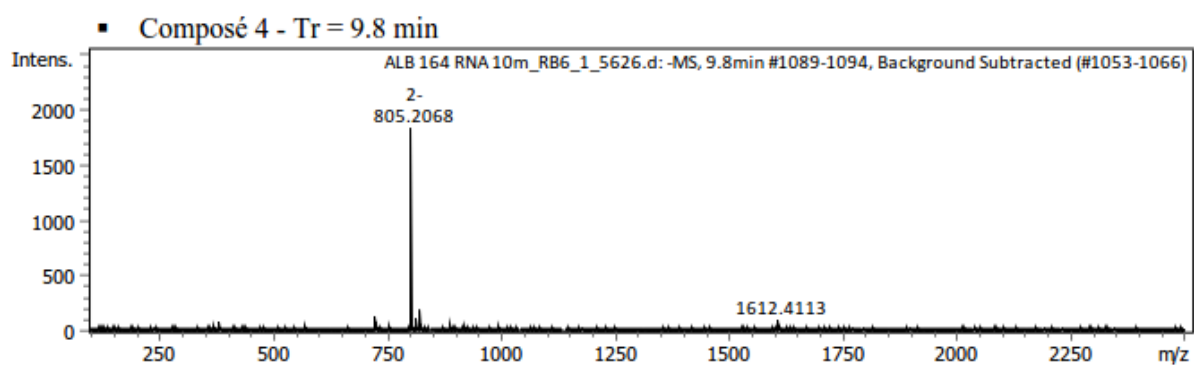

Mass observed: 1612.41

4R>p-EDC-EDC

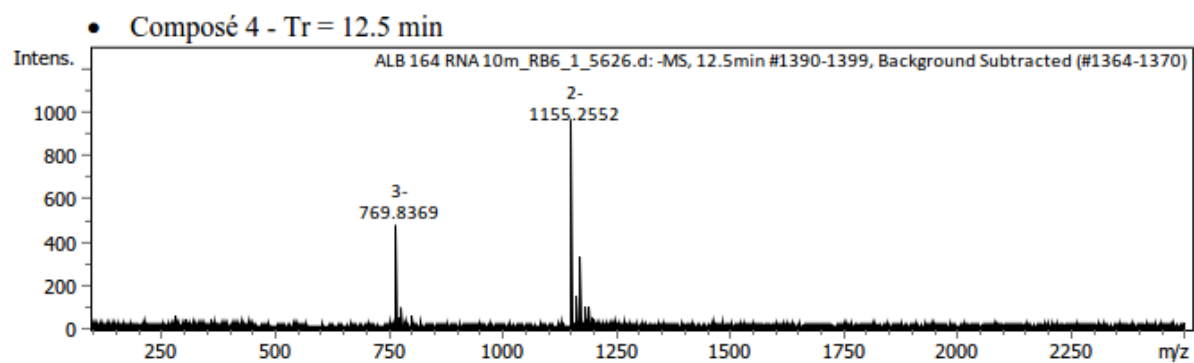

Mass observed: 2312.51

5R>p-EDC

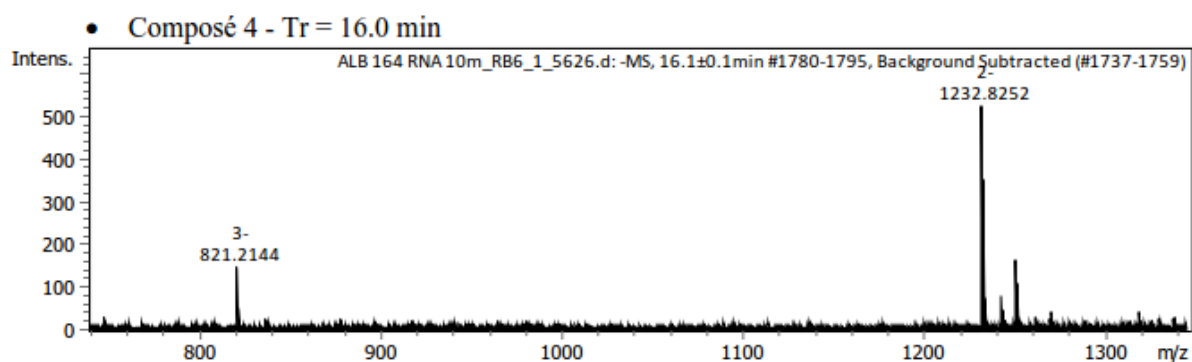

Mass observed: 2467.51

5R>p-EDC-EDC

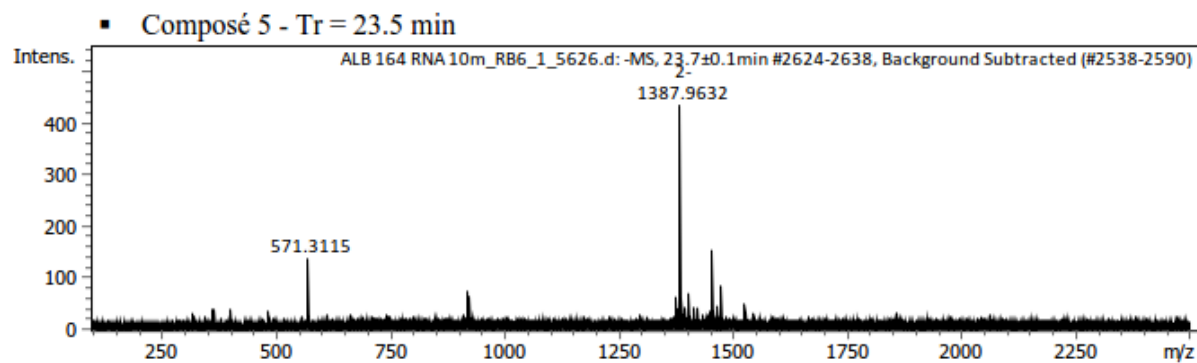

Mass observed: 2777.92

Unidentified derivative

Figure S41. E.R experiment after 10 months-incubation at 4-6°C. A) UV chromatogram (260 nm), B) all-negative-ion LC-MS chromatogram, picked (colour-filled) main peaks 1-5 annotated with their retention times, C-F) extracted ion chromatograms (EIC) for mass ranges of the possible products of ligation targeting C: [9Rf>p]<sup>3-</sup>, D: [9Rf>p]<sup>3-</sup> and [9Rfp]<sup>3-</sup> (found at 12.5, 16.0 and 23.5 min: [5R>p-EDC]<sup>2-</sup>, [5R>p-EDC-EDC]<sup>2-</sup> and unidentified [UI]<sup>2-</sup>), E: [9Rf>p-EDC]<sup>3-</sup> and [9Rfp-EDC]<sup>3-</sup>, F: [9Rf>p]<sup>2-</sup>, [9Rfp]<sup>2-</sup>, [9Rf>p-EDC]<sup>2-</sup>, [9Rfp-EDC]<sup>2-</sup> and [9Rfp-EDC-EDC]<sup>2-</sup>, followed by mass spectra of the annotated peaks, associated molecular masses (1-5) and identified compounds.



## E.H experiment (10 months):

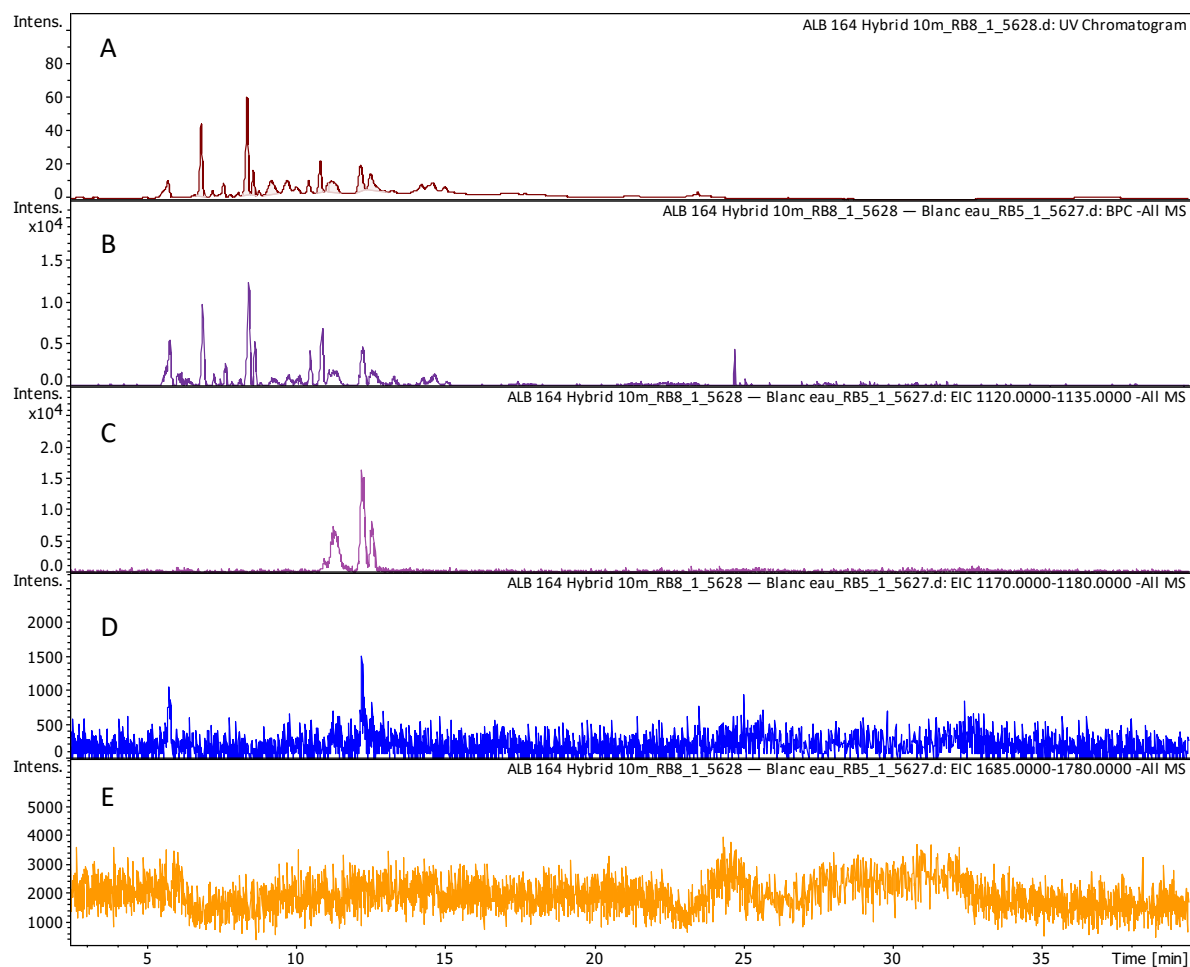

### • Chromatogrammes (Haut : UV 260 nm, Bas : MS-)

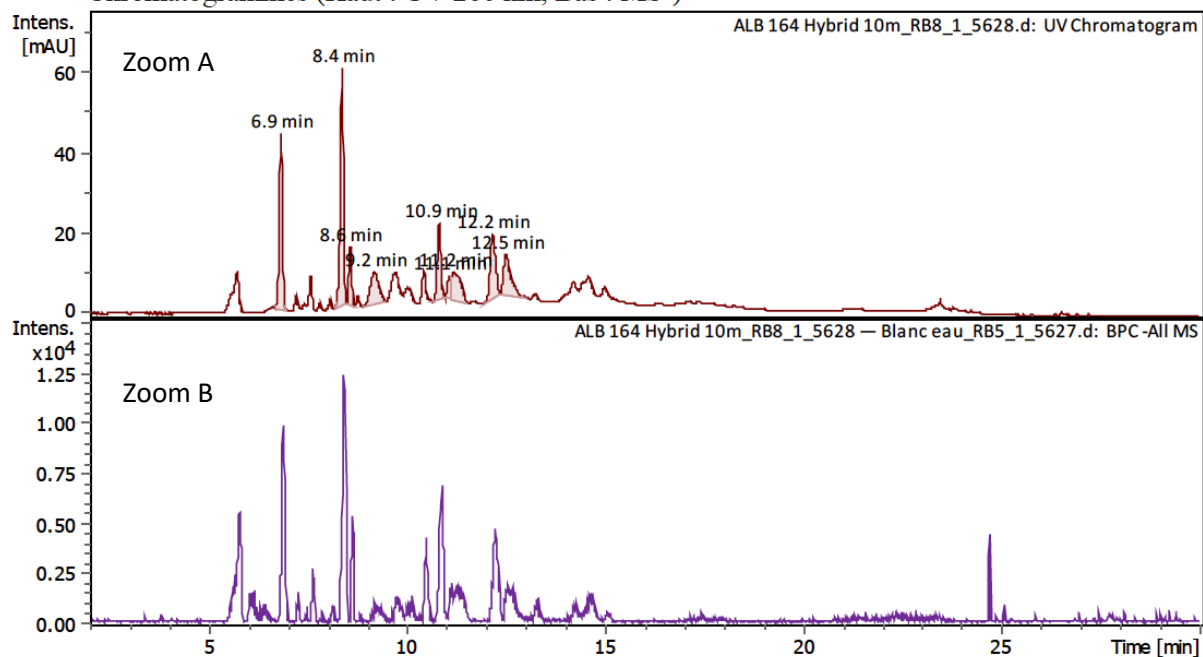

▪ Composé 1 – Tr 6.9 min

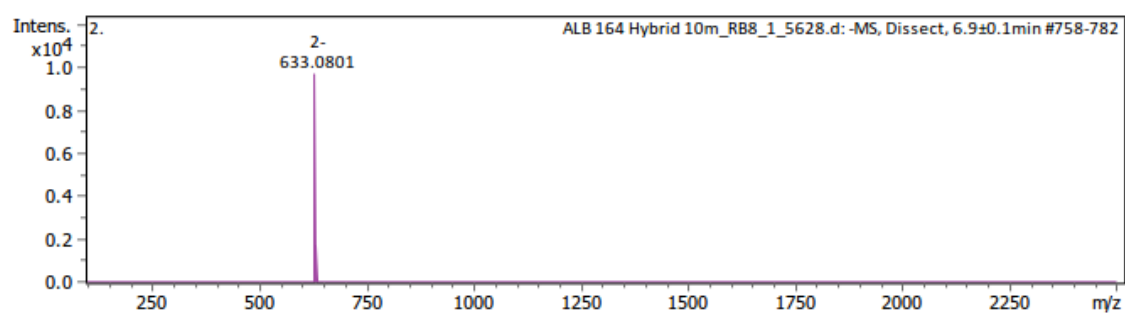

| Meas. m/z | Ion Formula                                                                    | Sum Formula                                                                    | m/z      | err [ppm] | mSigma | Adduct | z  |
|-----------|--------------------------------------------------------------------------------|--------------------------------------------------------------------------------|----------|-----------|--------|--------|----|
| 633.0801  | C <sub>39</sub> H <sub>46</sub> N <sub>14</sub> O <sub>27</sub> P <sub>4</sub> | C <sub>39</sub> H <sub>48</sub> N <sub>14</sub> O <sub>27</sub> P <sub>4</sub> | 633.0809 | 1.3       | 21.6   | M-H    | 2- |

→ Le spectre de masse met en évidence la présence des adduits correspondant à un produit dont la formule brute est la suivante : **C<sub>39</sub>H<sub>46</sub>N<sub>14</sub>O<sub>27</sub>P<sub>4</sub>**.

4H>p

▪ Composé 2 - Tr = 8.4 min

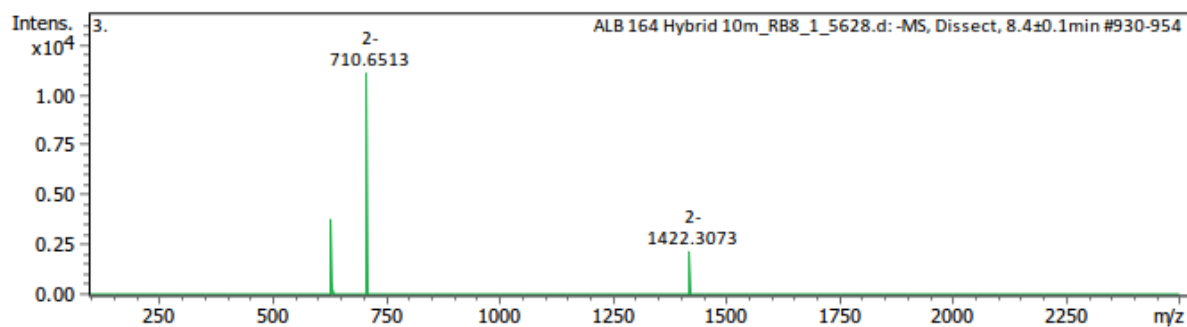

Zoom :

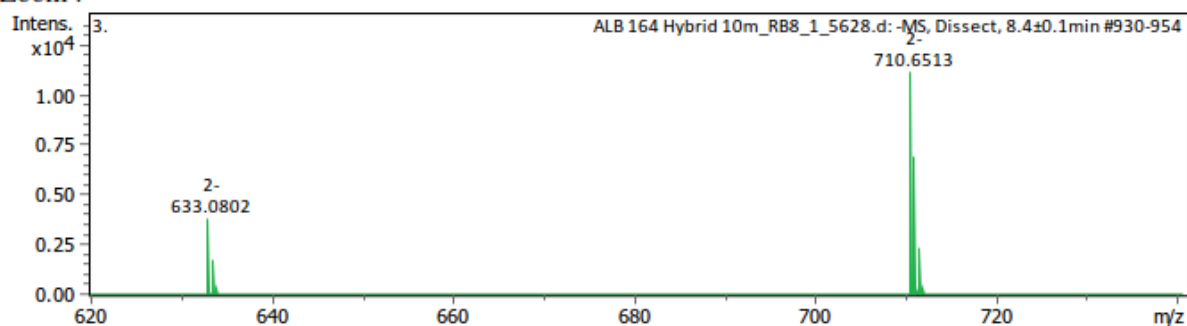

Mass observed: 1423.30

4H>p-EDC

■ Composé 3 - Tr = 8.6 min

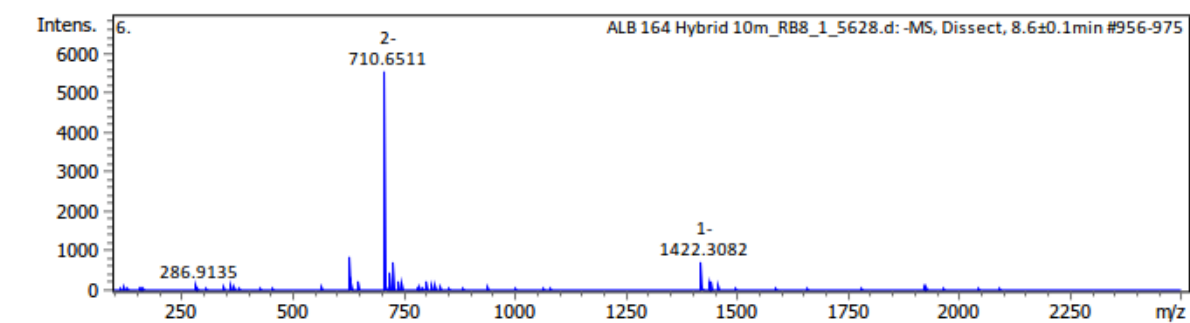

Zoom :

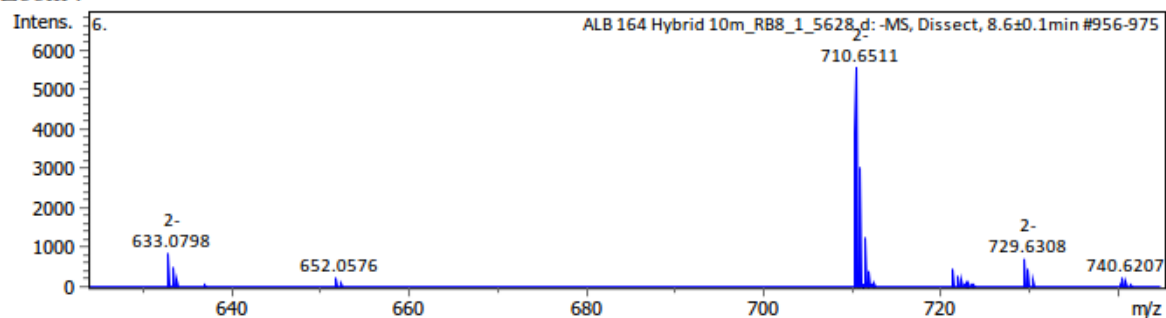

Mass observed: 1423.30

4H>p-EDC

■ Composé 4 - Tr = 9.2 min

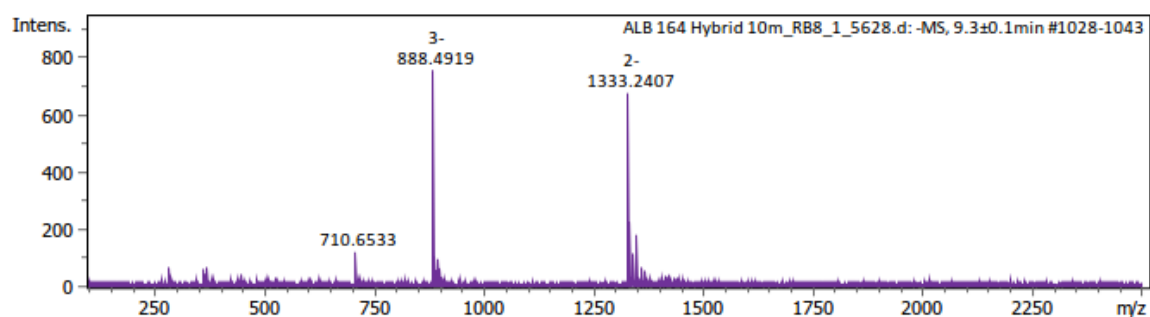

| Meas. m/z | Ion Formula     | Sum Formula     | m/z      | err [ppm] | mSigma | Adduct | z  |
|-----------|-----------------|-----------------|----------|-----------|--------|--------|----|
| 888.1579  | C85H106N35O50P8 | C85H109N35O50P8 | 888.1582 | 0.3       | 37.7   | M-H    | 3- |

→ Le spectre de masse met en évidence la présence des adduits correspondant à un produit dont la formule brute est la suivante :  $C_{85}H_{109}N_{35}O_{50}P_8$ .

■ Composé 4' - Tr = 10.9 min

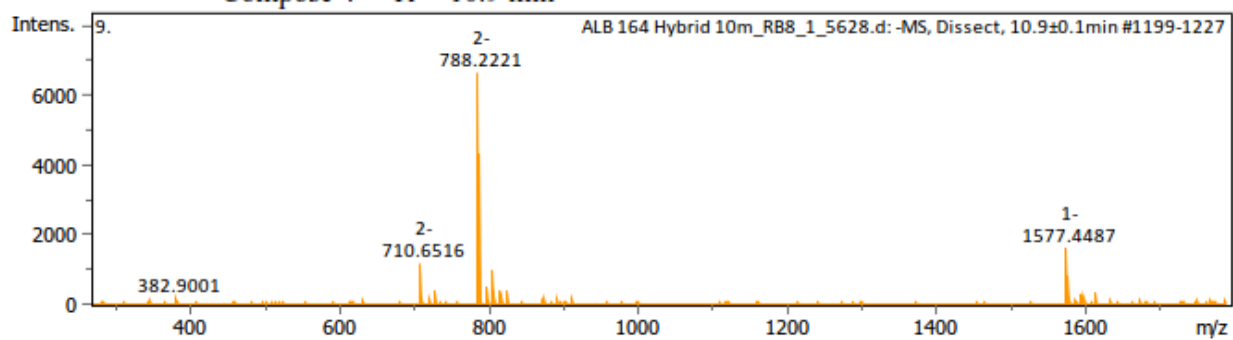

Mass observed: 1578.44

4H>p-EDC-EDC

■ Composé 4'' - Tr = 11.1 min

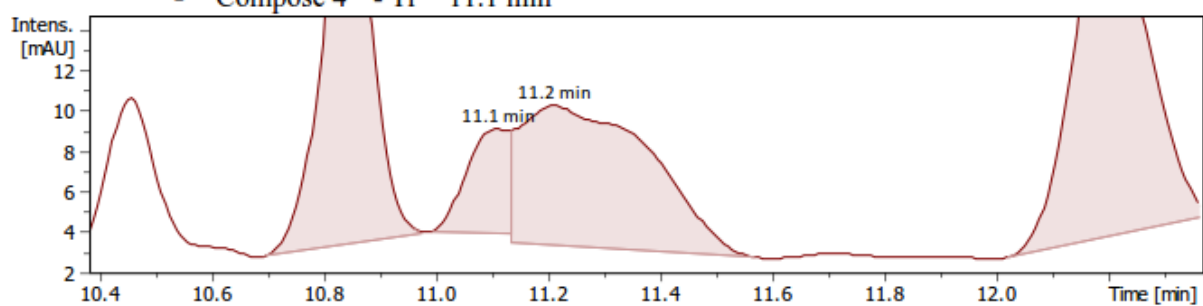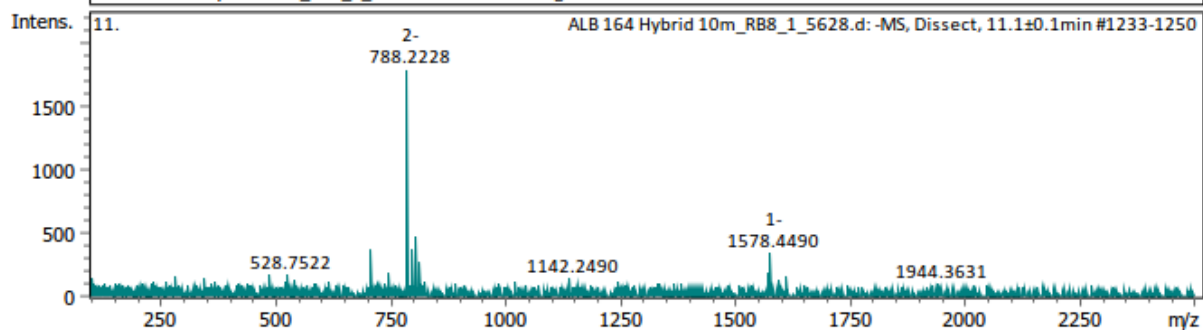

Mass observed: 1578.44

4H>p-EDC-EDC

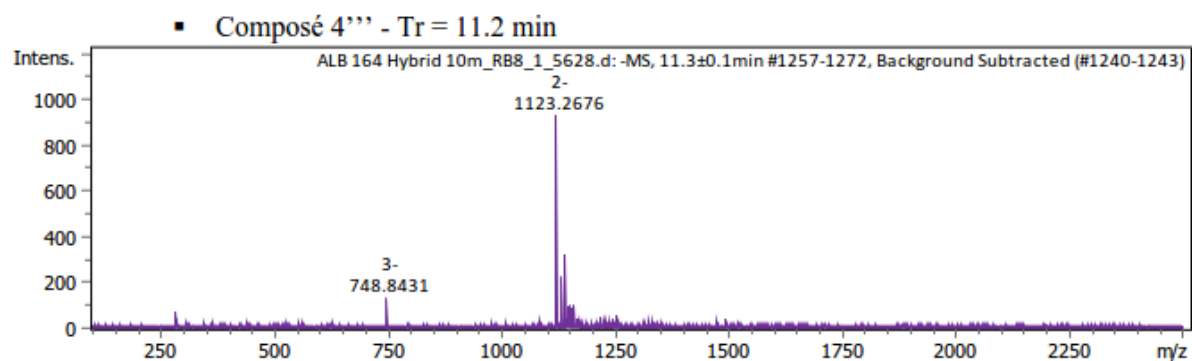

Mass observed: 2248.53

c5Dp-EDC

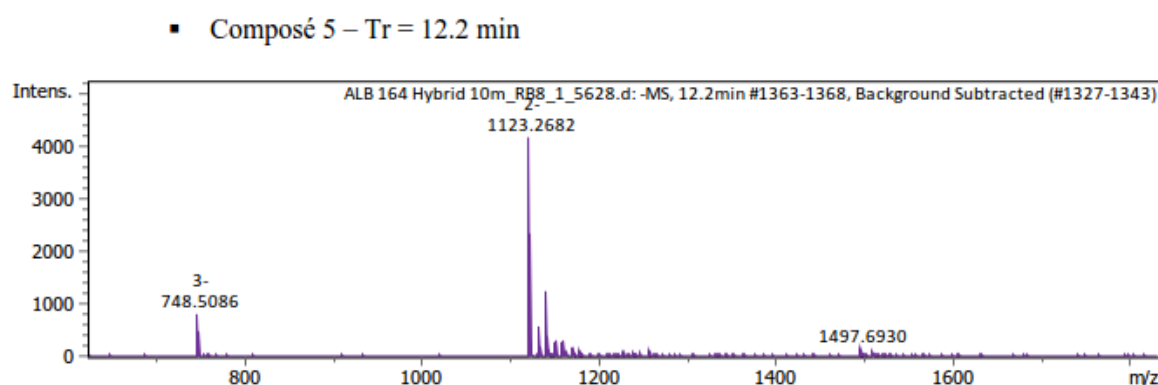

Mass observed: 2248.54

c5Dp-EDC

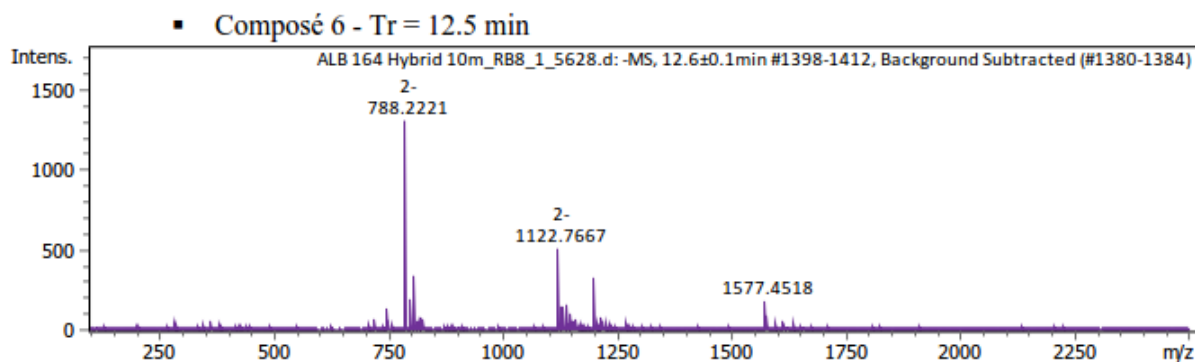

Mass observed: 1578.44

4H>p-EDC-EDC

Figure S42. E.H experiment after 10 months-incubation at 4-6°C. A) UV chromatogram (260 nm), B) all-negative-ion LC-MS chromatogram, picked (colour-filled) main peaks 1-6 annotated with their retention times (in Zoom A below), C-E) extracted ion chromatograms (EIC) for mass ranges of the possible products of ligation targeting C: [9Hf>p]<sup>3-</sup> and [9Hfp]<sup>3-</sup> (found at 11.2, 12.2 and 12.5 min compounds 4''', 5 and 6: [c5Dp-EDC]<sup>2-</sup> and [4Hp-EDC-EDC]<sup>2-</sup>), D: [9Hf>p-EDC]<sup>2-</sup> and [9Hfp-EDC]<sup>2-</sup> (found 2 minor unidentified [UI]<sup>2-</sup> peaks of molecular mass < 3000 Da), E: [9Hf>p]<sup>2-</sup>, [9Hfp]<sup>2-</sup>, [9Hf>p-EDC]<sup>2-</sup>, [9Hfp-EDC]<sup>2-</sup> and [9Hfp-EDC-EDC]<sup>2-</sup>, followed by mass spectra of the annotated peaks, associated molecular masses (1-6) and identified compounds.

## E.D experiment (10 months):

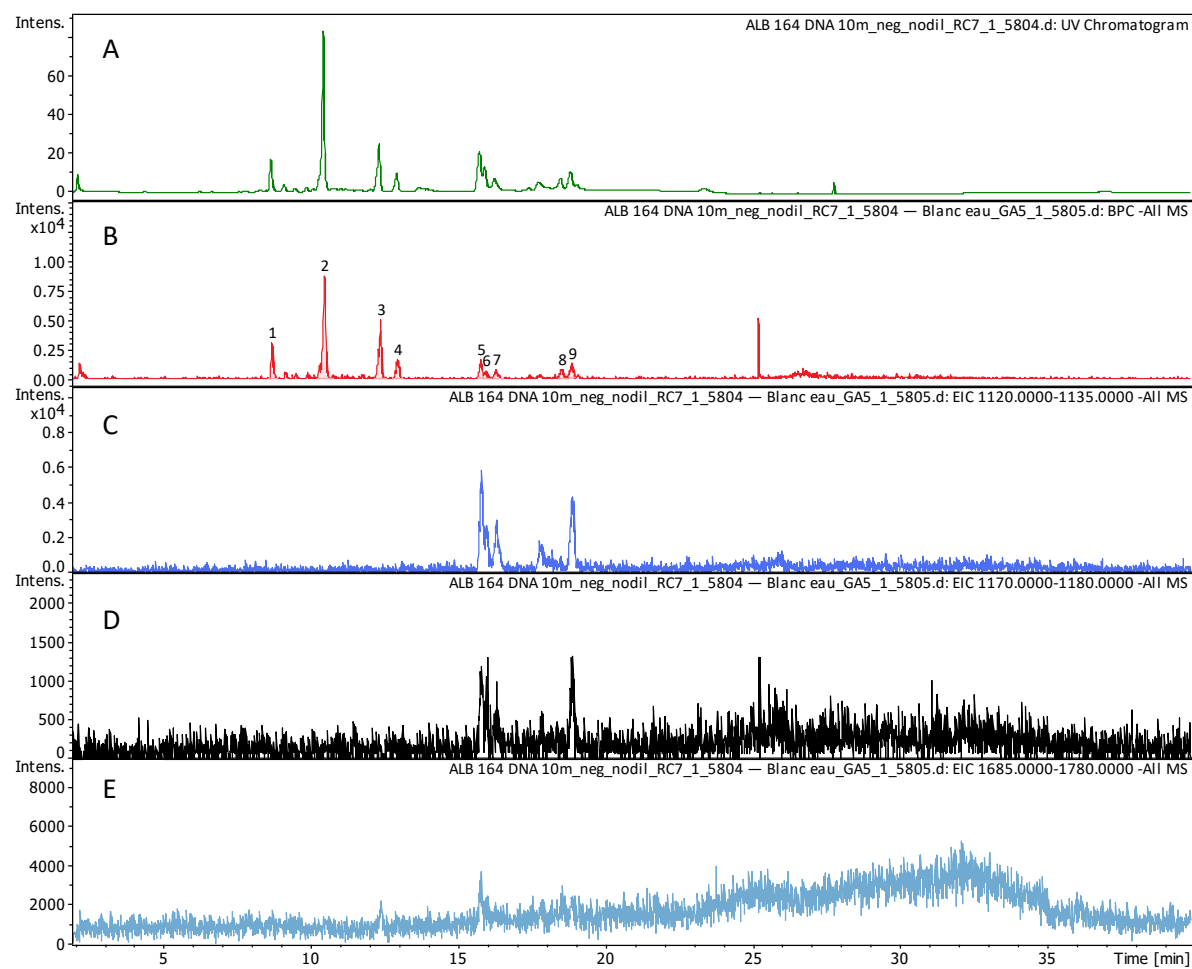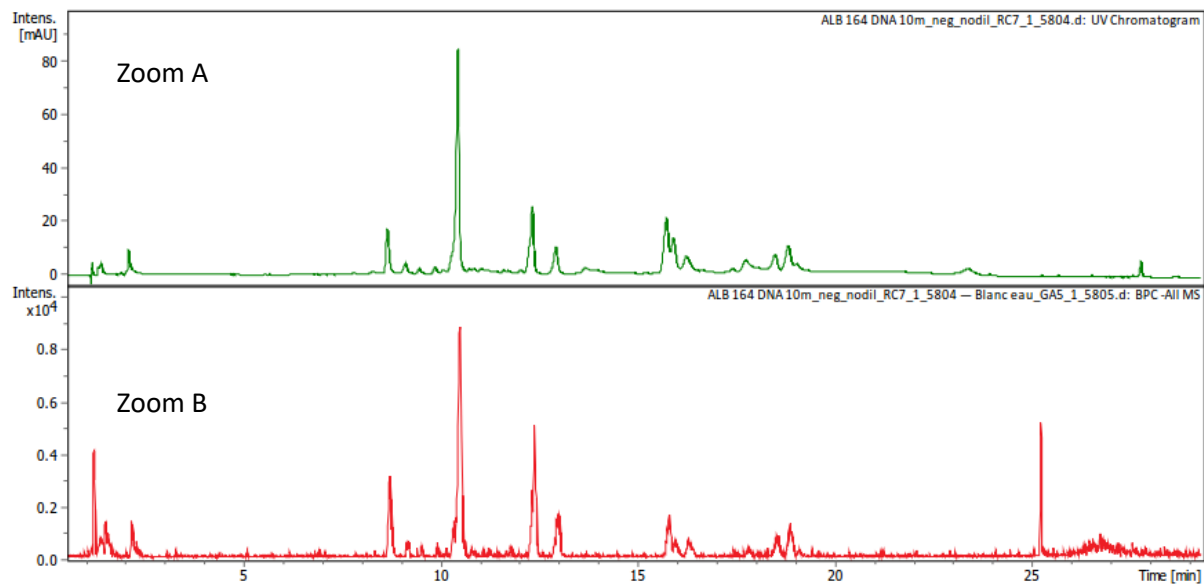

■ Composé 1 - Tr = 8.7 min

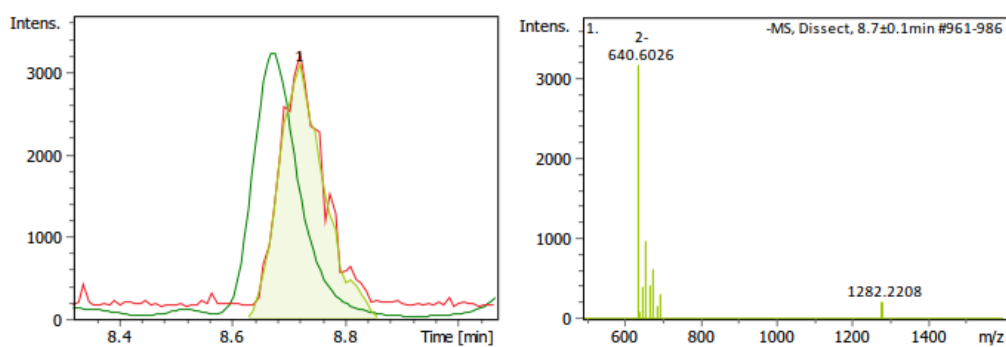

| Meas. m/z | Ion Formula    | Sum Formula    | m/z      | err [ppm] | mSigma | Adduct | z  |
|-----------|----------------|----------------|----------|-----------|--------|--------|----|
| 640.6026  | C45H51N13O24P4 | C45H53N13O24P4 | 640.6066 | 6.2       | 24.7   | M-H    | 2- |
| 640.6026  | C40H51N15O26P4 | C40H53N15O26P4 | 640.6046 | 3.1       | 16     | M-H    | 2- |
| 640.6026  | C39H55N11O30P4 | C39H57N11O30P4 | 640.6039 | 2         | 20.3   | M-H    | 2- |
| 640.6026  | C35H51N17O28P4 | C35H53N17O28P4 | 640.6025 | -0.1      | 29.9   | M-H    | 2- |
| 640.6026  | C41H51N13O27P4 | C41H53N13O27P4 | 640.5989 | -5.7      | 15.5   | M-H    | 2- |
| 640.6026  | C37H47N19O25P4 | C37H49N19O25P4 | 640.5976 | -7.8      | 20.8   | M-H    | 2- |
| 640.6026  | C36H51N15O29P4 | C36H53N15O29P4 | 640.5969 | -8.8      | 27.8   | M-H    | 2- |

4Dp

■ Composé 2 - Tr = 10.5 min

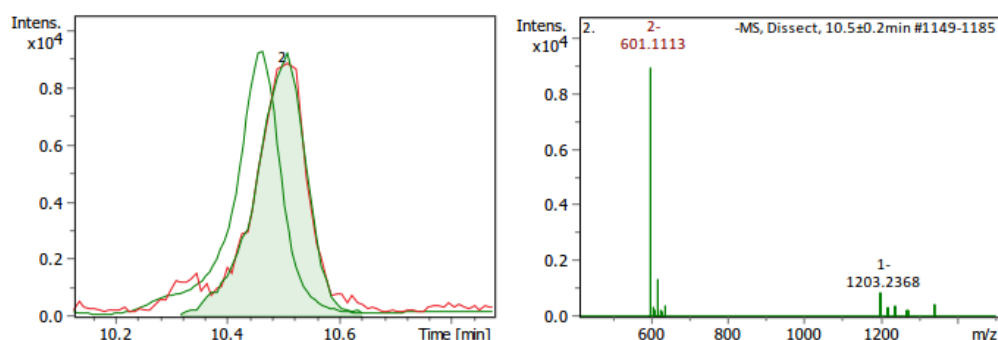

| Meas. m/z | Ion Formula    | Sum Formula    | m/z      | err [ppm] | mSigma | Adduct | z  |
|-----------|----------------|----------------|----------|-----------|--------|--------|----|
| 601.1113  | C38H54N12O25P4 | C38H56N12O25P4 | 601.1142 | 4.8       | 27.3   | M-H    | 2- |
| 601.1113  | C39H54N10O26P4 | C39H56N10O26P4 | 601.1086 | -4.5      | 24.9   | M-H    | 2- |
| 601.1113  | C35H50N16O24P4 | C35H52N16O24P4 | 601.1073 | -6.7      | 37     | M-H    | 2- |

4D

■ Composé 3 - Tr = 12.4 min

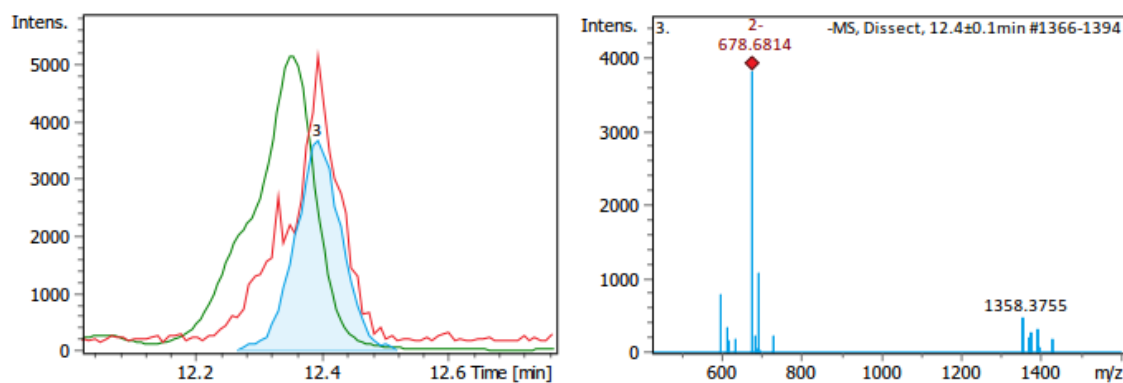

Soit  $M = 678.7 \times 2 + 2 = 1359.4 \text{ Da}$

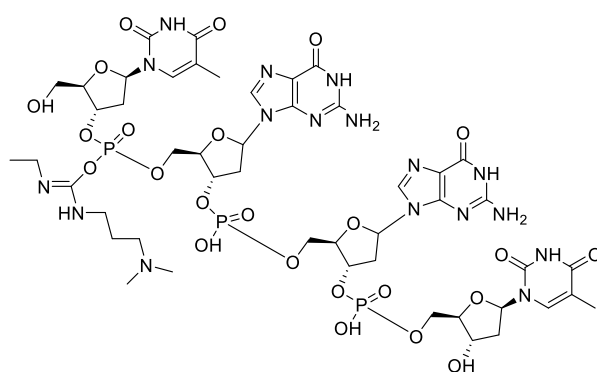

Chemical Formula:  $\text{C}_{49}\text{H}_{68}\text{N}_{17}\text{O}_{24}\text{P}_3$   
Exact Mass: 1359.38

4D-EDC

■ Composé 4 - Tr = 13.0 min

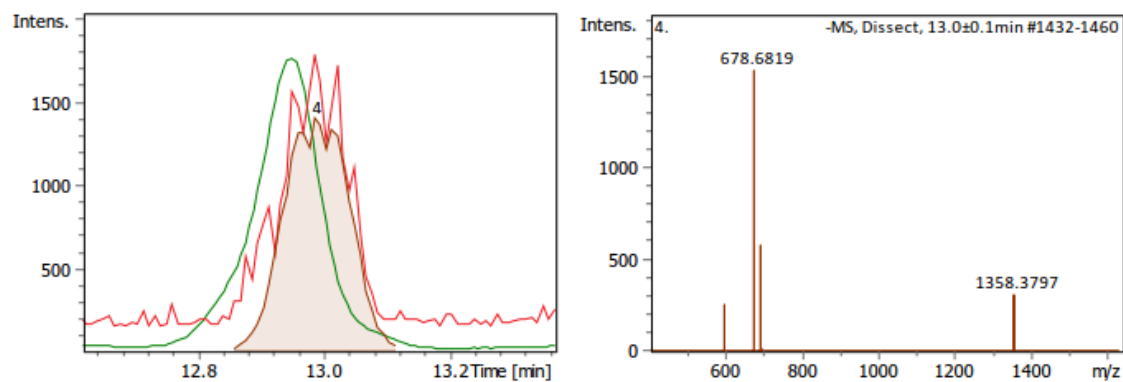

Soit  $M = 678.7 \times 2 + 2 = 1359.4 \text{ Da}$

4D-EDC



▪ Composé 5 - Tr = 15.8 min

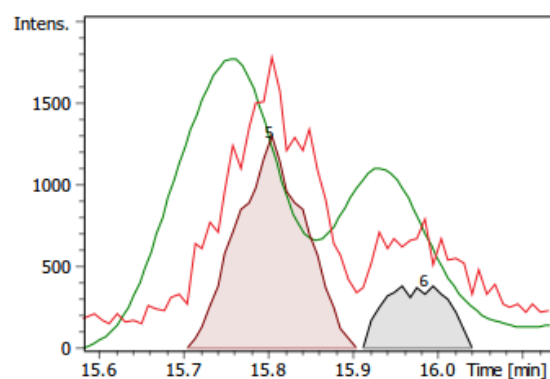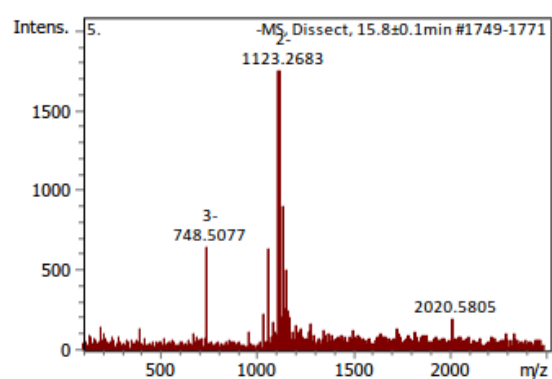

Soit  $M = 1123.3 \times 2 + 2 = 2248.6 \text{ Da}$

c5Dp-EDC

▪ Composé 6 - Tr = 16.0 min

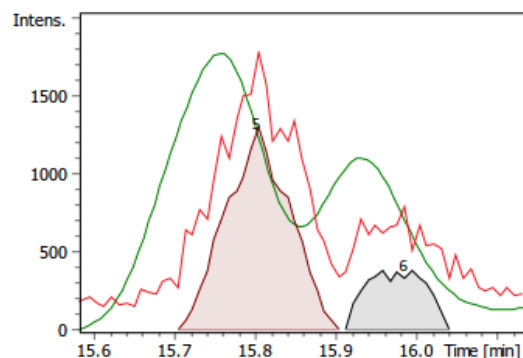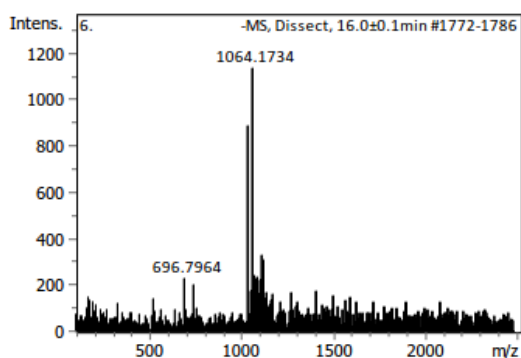

Mass observed: 2130.35

Unidentified derivative

▪ Composé 7 - Tr = 16.3 min

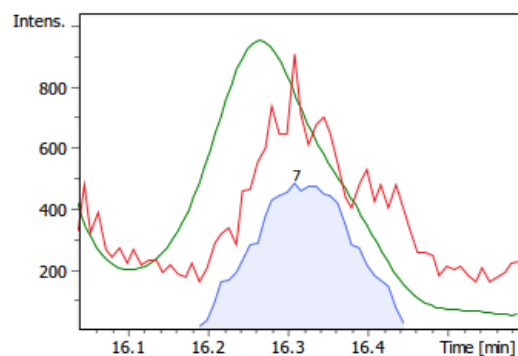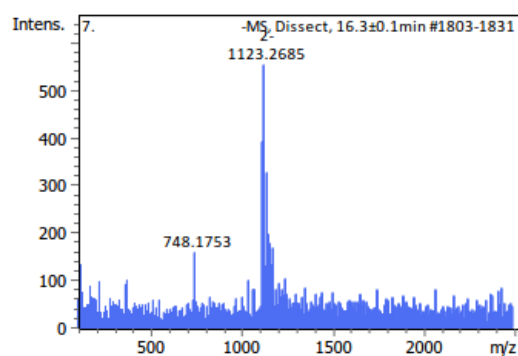

Soit  $M = 1123.3 \times 2 + 2 = 2248.6 \text{ Da}$

c5Dp-EDC

Composé 8 - Tr = 18.6 min

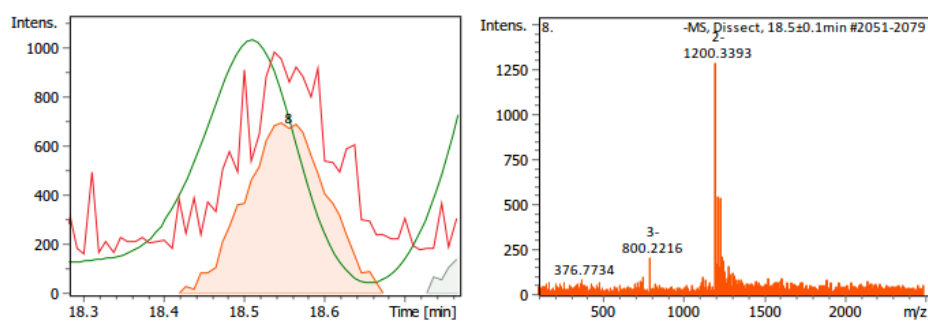

Soit  $M=1200.3 \times 2 + 2 = 2402.6 \text{ Da}$

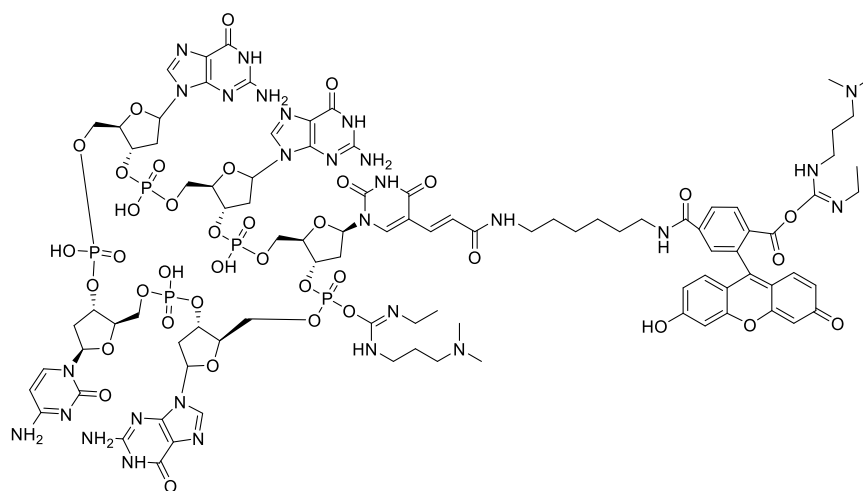

Chemical Formula:  $\text{C}_{94}\text{H}_{119}\text{N}_{28}\text{O}_{38}\text{P}_5$   
Exact Mass: 2402,69

c5Dp-EDC-EDC

Composé 9 - Tr = 18.9 min

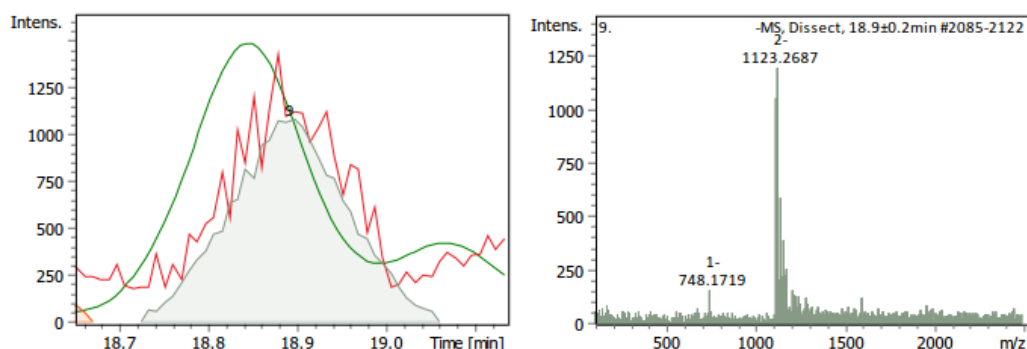

Soit  $M=1123.3 \times 2 + 2 = 2248.6 \text{ Da}$

c5Dp-EDC

Figure S43. E.D experiment after 10 months-incubation at 4-6°C. A) UV chromatogram (260 nm), B) all-negative-ion LC-MS chromatogram (main peaks annotated 1-9), C-E) extracted ion chromatograms (EIC) for mass ranges of the possible products of ligation targeting C:  $[\text{9Df}>\text{p}]^{3-}$  and  $[\text{9Dfp}]^{3-}$  (found in peak 9:  $[\text{c5Dp-EDC}]^{2-}$ , 13-17 min. several unidentified  $[\text{UI}]^{2-}$ ), D:  $[\text{9Df}>\text{p-EDC}]^{2-}$  and  $[\text{9Dfp-EDC}]^{2-}$ , E:  $[\text{9Df}>\text{p}]^{2-}$ ,  $[\text{9Dfp}]^{2-}$ ,  $[\text{9Df}>\text{p-EDC}]^{2-}$ ,  $[\text{9Dfp-EDC}]^{2-}$  and  $[\text{9Dfp-EDC-EDC}]^{2-}$  (found several minor unidentified  $[\text{UI}]^{2-}$  peaks of molecular mass < 3000 Da), followed by mass spectra of the annotated peaks, their molecular masses (1-9) and identified compounds (only one isomer shown).

#### Prebiotic vesicle preparation in E5/E5-like conditions:

A mixture of lipids containing LA, MLG, DLPA (1:1:1) was diluted in a flask in 1 mL of MeOH (5 mM total lipid concentration). The solvent was evaporated using a rotavapor and a bath at 40°C to form a thin lipid film. After dehydration overnight, the film was rehydrated overnight at room temperature with 1 mL of a buffer solution containing 100 mM NaCl, 250 mM EDC pH 6.0 (E-conditions) ( $\pm$  5 mM MgCl<sub>2</sub> or MnCl<sub>2</sub>) (E-like conditions). After hydration, the samples were supplemented with 250 mM of sulfo-NHS. Micrograph images were taken at each step using 3  $\mu$ M of *Nile Red*<sup>TM</sup>.

## 5) References

1. Jash, B.; Tremmel, P.; Jovanovic, D.; Richert, C. Single Nucleotide Translation without Ribosomes. *Nat. Chem.* **2021**, *13*, 751–757, <https://doi.org/10.1038/s41557-021-00749-4>.
2. Le Chevalier Isaad, A.; Carrara, P.; Stano, P.; Krishnakumar, K.S.; Lafont, D.; Zamboulis, A.; Buchet, R.; Bouchu, D.; Albrieux, F.; Strazewski, P. A Hydrophobic Disordered Peptide Spontaneously Anchors a Covalently Bound RNA Hairpin to Giant Lipidic Vesicles. *Org. Biomol. Chem.* **2014**, *12*, 6363–6373, <https://doi.org/10.1039/C4OB00721B>.
3. Eberle, F.; Gießler, K.; Deck, C.; Heeg, K.; Peter, M.; Richert, C.; Dalpke, A.H. Modifications in Small Interfering RNA that Separate Immunostimulation from RNA Interference. *J. Immunol.* **2008**, *180*, 3229–3237, <https://doi.org/10.4049/jimmunol.180.5.3229>.
4. Naylor, R.; Gilham, P.T. Studies on Some Interactions and Reactions of Oligonucleotides in Aqueous Solution. *Biochemistry* **1966**, *5*, 2722–2728, <https://doi.org/10.1021/bi00872a032>.
